# Supplementary material for: A gut microbiome-kidney-heart axis predictive of future cardiovascular diseases.
Source: Research Square preprint supplement (doi:10.21203/rs.3.rs-5843796/v1), 2025-09-08
Supplement: Supplementary file 1 [file 62ce892f010aa2364d5db2f0.xlsx]

## Sheet: Legends
Table	Details
ST1	Supplementary Table 1: Gut microbiome compositional and functional variance explained by host variables, univariate analyses. R2 (explained variance) and P-values derived from univariate ADONIS analysis of the Bray-Curtis dissimilarity indices of genus, MGS, GMM and KEGG pathways, respectively, using key environmental variables as predictors (e.g., diet, medication, demographics, lifestyle, preco…
ST2	Supplementary Table 2: Host variables affect the gut microbiome, metabolome and phenome in healthy individuals. Associations among host variables (e.g., diet, medication, demographics, lifestyle, preconditions and stool characteristics) and gut microbiome composition (i.e., genus, MGS) and functions (i.e., GMM, KEGG pathways) and metabolome tested using Spearman correlation in the MetaCardis heal…
ST3	Supplementary Table 3: Microbiome affects the phenome in healthy individuals. Multivariate (CA-PLS) models explaining (R2) and predicting (q2 as the goodness of prediction) the proportion of variance of clinical variables using gut microbiome composition (i.e., genus, MGS) and functions (i.e., GMM, KEGGp) as predictors and demographics (i.e., age, sex and country) as covariates in the MetaCardis …
ST4	Supplementary Table 4: Gut microbial functions associate with circulating proANP levels in healthy individuals. Associations among clinical variables and gut microbiome composition (i.e., MGS) and functions (i.e., GMM, KEGG pathways) tested using demographics adjusted linear models in the MetaCardis healthy individuals (n = 255). Partial spearman correlations were used for MGS whereas linear regr…
ST5	Supplementary Table 5: Gut microbial functions associated with circulating proANP levels are driven by fecal microbial load in healthy individuals. Associations among circulating proANP levels and gut microbiome GMM and KEGG pathways tested using two models i.e., model 1: demographics adjusted and model 2: demographics and fecal microbial load adjusted, in the MetaCardis healthy individuals (n = …
ST6	Supplementary Table 6: Mediation analyses testing gut microbial functions (GMMs) as mediators of the fecal microbial load-proANP associations in healthy individuals. ACME, ADE and total effects, related P-values were derived from demographics-adjusted mediation analyses (using mediation package in R) for each of 78 GMMs that associated with proANP in demographics-adjusted linear models (n =255). …
ST7	Supplementary Table 7: Mediation analyses testing gut microbial functions (KEGG pathways) as mediators of the fecal microbial load-proANP associations in healthy individuals. ACME, ADE and total effects, related P-values were derived from demographics-adjusted mediation analyses (using mediation package in R) for each of 168 KEGG pathways that associated with proANP in demographics-adjusted linea…
ST8	Supplementary Table 8: Metabolites associated with plasma proANP concentrations in healthy individuals. Associations among circulating proANP levels and metabolome tested using linear models adjusted for demographics (i.e., age, sex and country) in the MetaCardis healthy individuals (n = 230-274). Effect sizes (standardised beta) and significance level are reported (linear regression using rankno…
ST9	Supplementary Table 9: Microbiome affects the metabolome in healthy individuals. Multivariate (CA-PLS) models explaining (R2) and predicting (q2 as the goodness of prediction) the proportion of variance of metabolome using gut microbiome composition (i.e., genus, MGS) and functions (i.e., GMM, KEGGp) as predictors and demographics (i.e., age, sex and country) as covariates in the MetaCardis healt…
ST10	Supplementary Table 10: Microbiome associates with key metabolites and kidney-heart variables in healthy individuals. Associations among metagenomic species and key metabolites derived from phenylalanine-tyrosine metabolism as well as key clinical variables tested using demographics-adjusted Spearman correlations in the MetaCardis healthy individuals. Effect sizes (Spearman rho) and significance …
ST11	Supplementary Table 11: Confounders analyses in the MetaCardis population. List of host variables included in the confounder analyses for the metabolically healthy controls and individuals with CMD in the MetaCardis population, respectively.
ST12	Supplementary Table 12: Confounder-controlled associations among gut microbiome, key metabolites and kidney-heart variables identified in the healthy individuals and replicated in those with CMD within the MetaCardis population. List of associations among gut microbiome features (i.e., ecological, taxonomy and functions), key metabolites derived from phenylalanine-tyrosine metabolism and kidney-h…
ST13	Supplementary Table 13: Mediation analyses testing metabolites as mediators of the microbiome-eGFR associations in healthy individuals. ACME, ADE, total effects and related P-values were derived from demographics-adjusted mediation analyses (using mediation package in R) for each deconfounded microbiome-metabolite association listed in Supplementary Table 12, where microbiome feature was treated …
ST14	Supplementary Table 14: Mediation analyses testing metabolites as mediators of the microbiome-proANP associations in healthy individuals. ACME, ADE, total effects and related p-values were derived from demographics-adjusted mediation analyses (using mediation package in R) for each deconfounded microbiome-metabolite association listed in Supplementary Table 12, where microbiome feature was treate…
ST15	Supplementary Table 15: Genetic instruments used in the Mendelian Randomization analyses.
ST16	Supplementary Table 16: Univariate Mendelian Randomization analyses of circulating metabolites and kidney function (eGFR). Genetic associations for key metabolites were derived from the CLSA except for 4-cresol, which were derived from the EGEA (see Methods) and eGFR from the CKDGen. For related sctter and funnel plots please see Supplementary Figures 5 and 7. Table A represents the estimates fro…
ST17	Supplementary Table 17: Univariate Mendelian Randomization analyses of eGFR and circulating metabolites. Genetic associations for key metabolites were derived from the CLSA except for 4-cresol, which were derived from the EGEA (see Methods) and for eGFR from the CKDGen. For related sctter and funnel plots please see Supplementary Figures 6 and 7. Table A represents the estimates from IVW pre- and…
ST18	Supplementary Table 18: Univariate Mendelian Randomization analyses of circulating metabolites and NPPA. Genetic associations for metabolites were derived from the CLSA except for 4-cresol, which were derived from the EGEA (see Methods) and for NPPA from the deCODE study. For related sctter and funnel plots please see Supplementary Figures 8 and 10. Table A represents the estimates from IVW pre- …
ST19	Supplementary Table 19: Univariate Mendelian Randomization analyses of NPPA on circulating metabolites. Genetic associations for metabolites were derived from the CLSA except for 4-cresol, which were derived from the EGEA (see Methods) and for NPPA from the deCODE study. For related sctter and funnel plots please see Supplementary Figures 9 and 10. Table A represents the estimates from IVW pre- a…
ST20	Supplementary Table 20: Univariate bi-directional Mendelian Randomization analyses of eGFR-NPPA axis. Genetic associations for eGFR were derived from the CKDGen and for NPPA from the deCODE study. For related sctter and funnel plots please see Supplementary Figure 11.

## Sheet: ST1
Supplementary Table 1: Gut microbiome compositional and functional variance explained by host variables, univariate analyses.
Variable	DisplayName	Category	R2_genus	P_genus	FDR_genus	R2_MGS	P_MGS	FDR_MGS	R2_GMM	P_GMM	FDR_GMM	R2_KEGGp	P_KEGGp	FDR_KEGGp
AGL_OGTT	FFA	clinical	0.00626	0.27	0.798072	0.00688	0.06	0.32	0.00206	0.65	0.898647	0.00074	0.85	0.970909
BMI_C	BMI kg/m2	clinical	0.00266	0.74	0.903051	0.00502	0.41	0.661622	0.00052	0.98	0.986853	0.00017	0.99	0.996923
BPRAMAX_C	Systolic blood pressure (SBP) mmHg	clinical	0.00715	0.2	0.798072	0.00567	0.22	0.509538	0.00389	0.41	0.898647	0.00495	0.34	0.970909
BPRAMIN_C	Diastolic blood pressure (DBP) mmHg	clinical	0.00161	0.9	0.952941	0.00367	0.94	0.946573	0.00128	0.81	0.898647	0.00078	0.84	0.970909
CLEARAN_C	MDRD (kidney function) ml/mn	clinical	0.00318	0.65	0.850909	0.0048	0.51	0.661622	0.00061	0.96	0.986853	0.00072	0.85	0.970909
CREATIN	Plasma creatinin	clinical	0.01145	0.06	0.576	0.00823	0.02	0.192	0.00155	0.74	0.898647	0.00038	0.94	0.98087
FASTGLYC	Plasma glucose	clinical	0.00655	0.25	0.798072	0.008	0.02	0.192	0.00408	0.4	0.898647	0.00379	0.42	0.970909
FASTLIPCT_C	Total cholesterol in mmol/l	clinical	0.00139	0.93	0.966713	0.00483	0.49	0.661622	0.00309	0.51	0.898647	0.00351	0.43	0.970909
FASTLIPHDLC_C	HDL-cholesterol in mmol/l	clinical	0.00263	0.74	0.903051	0.00497	0.43	0.661622	0.00248	0.58	0.898647	0.00308	0.48	0.970909
FASTLIPLDL_C	LDL-cholesterol in mmol/l	clinical	0.00193	0.86	0.945672	0.00523	0.34	0.58988	0.00347	0.46	0.898647	0.00363	0.43	0.970909
FASTLIPTG_C	Triglycerides in mmol/l	clinical	0.01175	0.05	0.553846	0.00643	0.1	0.369231	0.01397	0.07	0.898647	0.01644	0.06	0.96
GLYCATHB	Glycated hemoglobin (HbA1C) (%)	clinical	0.00846	0.14	0.798072	0.00904	0.01	0.16	0.00509	0.32	0.898647	0.00484	0.34	0.970909
HBGDL_C	Hemoglobin in g/dl	clinical	0.00916	0.11	0.792	0.00729	0.05	0.288	0.00218	0.62	0.898647	0.00104	0.78	0.970909
INSULINE_T0_OGTTmUI	Fasting insulin	clinical	0.00329	0.62	0.842264	0.00445	0.66	0.736489	0.00421	0.39	0.898647	0.00392	0.4	0.970909
LIFUASAT_C	ASAT in U/l	clinical	0.0134	0.03	0.48	0.00587	0.18	0.471273	0.00347	0.46	0.898647	0.00464	0.35	0.970909
LIFUGGT_C	GGT in U/l	clinical	0.00161	0.91	0.956496	0.00546	0.27	0.552329	0.00053	0.97	0.986853	0.00011	1	1
LIFUNALT_C	ALAT in U/l	clinical	0.01179	0.05	0.553846	0.00489	0.47	0.661622	0.0016	0.73	0.898647	0.00146	0.7	0.970909
MODIMUSCM	Muscle mass	clinical	0.01661	0.01	0.48	0.00877	0.01	0.16	0.00247	0.58	0.898647	0.00128	0.74	0.970909
MODITOTFM	Fat mass	clinical	0.00545	0.34	0.798072	0.00493	0.45	0.661622	0.00153	0.75	0.898647	0.00115	0.76	0.970909
MODIVISCFM	Visceral fat rating	clinical	0.00693	0.22	0.798072	0.00976	0	0	0.00152	0.75	0.898647	0.0005	0.91	0.974118
MODIWEIGHT	Weight	clinical	0.0101	0.08	0.72	0.00709	0.05	0.288	0.00271	0.55	0.898647	0.00213	0.6	0.970909
Peptide_C_T0_OGTT	Peptide C fasting	clinical	0.0058	0.31	0.798072	0.00422	0.75	0.794118	0.00154	0.74	0.898647	0.00269	0.52	0.970909
POTASSIUM	Plasma potassium (K)	clinical	0.00485	0.41	0.798072	0.00821	0.02	0.192	0.00381	0.42	0.898647	0.00243	0.56	0.970909
PRO_ANP	proANP pmol/l	clinical	0.01796	0.01	0.48	0.00771	0.03	0.24	0.01586	0.05	0.898647	0.01806	0.04	0.96
SODIUM	Plasma sodium (Na)	clinical	0.00221	0.81	0.940645	0.00461	0.58	0.707797	0.00139	0.78	0.898647	0.00117	0.75	0.970909
WAISTCIRC	Waist circumference	clinical	0.00294	0.69	0.871579	0.00464	0.57	0.701538	0.00207	0.64	0.898647	0.00168	0.66	0.970909
WAISTHIP_C	Waist to hip ratio	clinical	0.00184	0.87	0.945672	0.00479	0.51	0.661622	0.00066	0.95	0.984173	0.00033	0.95	0.984173
ALLERGIE	Do you have allergies?	preconditions	0.00215	0.83	0.945	0.00442	0.67	0.736489	0.00493	0.34	0.898647	0.00379	0.42	0.970909
OSA	Do you have obstructive sleep apnea (OSA)?	preconditions	0.00869	0.52	0.805161	0.0096	0.55	0.682759	0.00626	0.62	0.898647	0.00678	0.55	0.970909
AGE	Age	demographics	0.00919	0.11	0.792	0.01033	0	0	0.00183	0.69	0.898647	0.00062	0.87	0.970909
CENTER_C	Country of recruitment	demographics	0.01696	0.09	0.762353	0.02515	0	0	0.00672	0.58	0.898647	0.00514	0.67	0.970909
GENDER	Sex	demographics	0.01679	0.01	0.48	0.0101	0	0	0.0023	0.61	0.898647	0.00064	0.87	0.970909
HTASTATUS_C	HTA status	preconditions	0.0095	0.1	0.792	0.00584	0.18	0.471273	0.00488	0.34	0.898647	0.00551	0.3	0.970909
MENOPAUSE	Menopausal	preconditions	0.01166	0.05	0.553846	0.0072	0.05	0.288	0.00315	0.49	0.898647	0.00189	0.63	0.970909
PREDIAB_C	Prediabetes status	preconditions	0.00493	0.4	0.798072	0.0045	0.64	0.731429	0.00397	0.4	0.898647	0.00487	0.33	0.970909
ANTIBIOTIC	Have you been treated with antibiotics in the last 5 years?	medication	0.00814	0.15	0.798072	0.00872	0.01	0.16	0.00524	0.31	0.898647	0.00423	0.38	0.970909
ANTIBIOTICS_TOTAL	Antibiotics total	medication	0.01151	0.06	0.576	0.00892	0.01	0.16	0.00643	0.25	0.898647	0.00451	0.37	0.970909
ANTIHTATT_C	Any antihypertensive treatment	medication	0.01488	0.02	0.48	0.00572	0.21	0.509538	0.0126	0.08	0.898647	0.01639	0.05	0.96
ANTILIPIDTT_C	Any antilipid treatment	medication	0.0045	0.45	0.798072	0.00452	0.64	0.731429	0.00225	0.62	0.898647	0.00216	0.6	0.970909
ANTITHOMBO_C	Anti-thrombocyte intake	medication	0.00493	0.37	0.798072	0.00399	0.85	0.874286	0.00325	0.48	0.898647	0.00401	0.4	0.970909
NRHTATT_C	Number of antihypertensive treatments	medication	0.01354	0.03	0.48	0.00562	0.23	0.509538	0.01121	0.11	0.898647	0.01425	0.08	0.970909
NRLIPIDTT_C	Number of anti-lipid treatments	medication	0.0045	0.44	0.798072	0.00452	0.62	0.725854	0.00225	0.61	0.898647	0.00216	0.59	0.970909
PPI_AND_PPI_RELATED_C	PPI (and related drugs) intake	medication	0.0027	0.73	0.903051	0.00476	0.52	0.668571	0.00153	0.76	0.898647	0.0009	0.82	0.970909
BITYPDEL	Birth: delivery mode	lifestyle	0.01112	0.33	0.798072	0.00933	0.64	0.731429	0.01249	0.27	0.898647	0.0142	0.23	0.970909
BREASTFED	Birth: breastfed?	lifestyle	0.00863	0.54	0.81	0.00952	0.59	0.71395	0.00738	0.53	0.898647	0.00808	0.48	0.970909
CURREMPL	Lifestyle: Currently employed?	lifestyle	0.00353	0.59	0.836571	0.00484	0.48	0.661622	0.00138	0.78	0.898647	0.00211	0.59	0.970909
educational_level_c	Education level	lifestyle	0.00758	0.65	0.850909	0.01077	0.28	0.552329	0.00881	0.44	0.898647	0.01053	0.36	0.970909
income_cu_c	Income by consumption unit	lifestyle	0.00947	0.47	0.805161	0.01201	0.11	0.377143	0.00479	0.73	0.898647	0.00465	0.7	0.970909
ls_sed_tps	Leisure sedentary time (h/week)	lifestyle	0.004	0.52	0.805161	0.00478	0.51	0.661622	0.00322	0.48	0.898647	0.00262	0.53	0.970909
pa_mvpa_tps	Moderate-to-vigorous intensity leisure-time physical activity (h/week)	lifestyle	0.00197	0.85	0.945672	0.005	0.43	0.661622	0.00135	0.79	0.898647	0.00046	0.92	0.974118
pa_screen_tps	Leisure sedentary time - Screen (h/week)	lifestyle	0.00186	0.87	0.945672	0.00425	0.75	0.794118	0.00284	0.53	0.898647	0.00222	0.58	0.970909
pa_work_2cl	Occupational physical activity	lifestyle	0.00442	0.46	0.798072	0.00473	0.53	0.669474	0.01019	0.13	0.898647	0.01041	0.13	0.970909
pamet_week	Total physical activity without work (MET h week -1)	lifestyle	0.00817	0.15	0.798072	0.00623	0.12	0.382041	0.01497	0.06	0.898647	0.01404	0.08	0.970909
REGCONTACT	Lifestyle: Regular contact with animals?	lifestyle	0.00229	0.8	0.936585	0.00531	0.31	0.57974	0.00146	0.76	0.898647	0.00189	0.63	0.970909
SMOKSTATUS_C	Creation of new simple smoking status	lifestyle	0.01496	0.44	0.798072	0.018	0.08	0.338824	0.00776	0.77	0.898647	0.00591	0.84	0.970909
aHEI	aHEI score (ranges from 0 to 70)	diet	0.00505	0.39	0.798072	0.00765	0.03	0.24	0.00886	0.16	0.898647	0.00744	0.21	0.970909
DASH	DASH score (ranges from 0 to 80)	diet	0.00113	0.95	0.966713	0.00487	0.47	0.661622	0.00093	0.88	0.931765	0.00048	0.91	0.974118
DDS	DDS score (ranges from 0 to 29)	diet	0.00206	0.84	0.945	0.00409	0.81	0.839137	0.00101	0.87	0.931765	0.00028	0.96	0.987429
food_37_animal_fats	Daily consumption of added animal fats (such as butter)	diet	0.0003	1	1	0.00381	0.9	0.912676	0.00115	0.83	0.898647	0.00153	0.68	0.970909
food_37_beer	Daily consumption of beer and cider	diet	0.00747	0.18	0.798072	0.00668	0.08	0.338824	0.0094	0.15	0.898647	0.01008	0.14	0.970909
food_37_bread	Daily bread consumption	diet	0.0021	0.83	0.945	0.00433	0.72	0.779549	0.00068	0.95	0.984173	0.00059	0.88	0.970909
food_37_breakfast	Daily consumption of breakfast cereals	diet	0.00661	0.24	0.798072	0.00826	0.02	0.192	0.00193	0.67	0.898647	0.00071	0.86	0.970909
food_37_cereals	Daily consumption of cereals, pasta and rice	diet	0.00902	0.12	0.798072	0.00645	0.1	0.369231	0.00587	0.28	0.898647	0.00621	0.26	0.970909
food_37_cheese	Daily cheese consumption	diet	0.00404	0.51	0.805161	0.00441	0.68	0.741818	0.00192	0.67	0.898647	0.00192	0.62	0.970909
food_37_coffee	Daily coffee consumption (with or without caffeine)	diet	0.00475	0.42	0.798072	0.00621	0.13	0.382041	0.00423	0.39	0.898647	0.004	0.4	0.970909
food_37_cookies_pastry	Daily consumption of pastry (such as cake, biscuits, croissants), creme desserts	diet	0.00372	0.56	0.814545	0.00527	0.32	0.58988	0.00472	0.35	0.898647	0.0045	0.36	0.970909
food_37_diet_soda	Daily consumption of artificially sweetened beverages	diet	0.00337	0.61	0.836571	0.00624	0.13	0.382041	0.00355	0.45	0.898647	0.00224	0.58	0.970909
food_37_eggs	Daily consumption of eggs and egg dishes	diet	0.00856	0.13	0.798072	0.00507	0.39	0.653023	0.01739	0.04	0.898647	0.01861	0.04	0.96
food_37_fruit_juices	Daily consumption of fruit juices	diet	0.00578	0.3	0.798072	0.00524	0.34	0.58988	0.00792	0.19	0.898647	0.0098	0.15	0.970909
food_37_fruits	Daily fruit consumption	diet	0.00596	0.29	0.798072	0.00607	0.15	0.423529	0.00478	0.34	0.898647	0.00674	0.24	0.970909
food_37_lean_fish	Daily consumption of lean fish & lean fish products	diet	0.00328	0.63	0.84785	0.00472	0.54	0.676174	0.00321	0.49	0.898647	0.00378	0.41	0.970909
food_37_milk	Daily milk consumption	diet	0.00124	0.94	0.966713	0.00448	0.65	0.736489	0.00207	0.64	0.898647	0.00184	0.63	0.970909
food_37_nuts	Daily consumption of nuts (including peanuts)	diet	0.01316	0.04	0.553846	0.0075	0.04	0.274286	0.02394	0.02	0.898647	0.02575	0.01	0.96
food_37_offal	Daily consumption of offal	diet	0.0034	0.61	0.836571	0.00545	0.28	0.552329	0.00282	0.53	0.898647	0.00238	0.56	0.970909
food_37_oily_fish	Daily consumption of oily fish & oily fish products	diet	0.00548	0.33	0.798072	0.00456	0.61	0.72	0.00548	0.3	0.898647	0.00447	0.37	0.970909
food_37_other_alcoholic_beverages	Daily consumption of other alcoholic beverages (such as liquors)	diet	0.00125	0.96	0.966713	0.00333	0.99	0.99	0.00053	0.99	0.99	0.00038	0.97	0.990638
food_37_other_hot_beverages	Daily consumption of other hot beverages (herbal or fruit tea, hot chocolate)	diet	0.0049	0.4	0.798072	0.00525	0.34	0.58988	0.00329	0.47	0.898647	0.00318	0.47	0.970909
food_37_otherdairy	Daily consumption of other dairy products (such as white cheese)	diet	0.00103	0.96	0.966713	0.00575	0.2	0.509538	0.00045	0.98	0.986853	0.0002	0.98	0.993803
food_37_pizza_lasagnes_raviolis	Daily consumption of mixed dishes based on cereals, such as pizza, lasagne, raviolis, ‚Ä¶	diet	0.00633	0.26	0.798072	0.00623	0.12	0.382041	0.00397	0.41	0.898647	0.00503	0.33	0.970909
food_37_plant_fats	Daily consumption of added plant fats (such as margarine and oil)	diet	0.00129	0.94	0.966713	0.00457	0.61	0.72	0.00137	0.78	0.898647	0.00061	0.88	0.970909
food_37_potatoes	Daily consumption of potatoes & potato dishes	diet	0.00494	0.4	0.798072	0.00653	0.09	0.35027	0.00506	0.32	0.898647	0.0041	0.39	0.970909
food_37_poultry	Daily consumption of poultry	diet	0.0017	0.89	0.949333	0.00444	0.67	0.736489	0.00264	0.55	0.898647	0.00289	0.51	0.970909
food_37_processed_meat	Daily consumption of processed meat & processed meat products (such as sausages)	diet	0.00347	0.6	0.836571	0.00487	0.47	0.661622	0.00302	0.5	0.898647	0.00385	0.41	0.970909
food_37_pulses	Daily pulses consumption	diet	0.00248	0.77	0.924	0.00511	0.39	0.653023	0.00125	0.81	0.898647	0.00125	0.74	0.970909
food_37_red_meat	Daily consumption of red meat & red meat products	diet	0.00294	0.69	0.871579	0.00618	0.13	0.382041	0.00465	0.35	0.898647	0.00408	0.39	0.970909
food_37_sauces	Daily consumption of sauces	diet	0.0048	0.41	0.798072	0.00483	0.49	0.661622	0.00231	0.6	0.898647	0.00287	0.51	0.970909
food_37_savoury_snacks	Daily consumption of savoury snacks (such as crisps)	diet	0.00761	0.18	0.798072	0.00772	0.03	0.24	0.00788	0.2	0.898647	0.00606	0.28	0.970909
food_37_soups	Daily soup consumption	diet	0.00371	0.57	0.8208	0.00522	0.34	0.58988	0.00445	0.37	0.898647	0.00381	0.41	0.970909
food_37_sweetened_beverages	Daily consumption of sugar-sweetened beverages (different from """"food_sweetened"""": exclusion of fruit juices and diet soda)	diet	0.00341	0.61	0.836571	0.00547	0.28	0.552329	0.00187	0.68	0.898647	0.0019	0.63	0.970909
food_37_sweets_spreads	Daily consumption of sweets (such as chocolate, ice cream, bonbons) and sweet spreads (honey, marmelade, 'nutella'-type spreads)	diet	0.00377	0.54	0.81	0.00516	0.37	0.634286	0.00127	0.8	0.898647	0.00091	0.81	0.970909
food_37_tea	Daily tea consumption (excluding herbal tea)	diet	0.00668	0.24	0.798072	0.0059	0.18	0.471273	0.00418	0.39	0.898647	0.00437	0.37	0.970909
food_37_vegetables	Daily vegetables consumption (different from """"food_vegetables"""": exclusion of pulses)	diet	0.00233	0.79	0.932459	0.00539	0.29	0.5568	0.00207	0.64	0.898647	0.00177	0.65	0.970909
food_37_water	Daily water consumption	diet	0.01357	0.03	0.48	0.0056	0.23	0.509538	0.02012	0.03	0.898647	0.02431	0.02	0.96
food_37_wine	Daily consumption of wine and champagne	diet	0.00378	0.56	0.814545	0.00556	0.25	0.537313	0.00129	0.81	0.898647	0.00102	0.78	0.970909
food_37_yogurt	Daily yogurt consumption	diet	0.00694	0.22	0.798072	0.00742	0.04	0.274286	0.01093	0.12	0.898647	0.00905	0.17	0.970909
nutr_alcohol	Alcohol intake	diet	0.00176	0.88	0.945672	0.00547	0.27	0.552329	0.00074	0.93	0.977518	0.00055	0.89	0.970909
nutr_betaine	Betaine (dietary)	diet	0.00591	0.3	0.798072	0.00681	0.07	0.336	0.00168	0.71	0.898647	0.00152	0.69	0.970909
nutr_ca	Calcium intake	diet	0.00684	0.22	0.798072	0.00694	0.06	0.32	0.00415	0.39	0.898647	0.00458	0.36	0.970909
nutr_carb_g	Carbohydrate intake	diet	0.00543	0.34	0.798072	0.00472	0.53	0.669474	0.00234	0.6	0.898647	0.00243	0.56	0.970909
nutr_carnitine	Carnitine (dietary)	diet	0.00301	0.68	0.871579	0.0067	0.08	0.338824	0.00095	0.88	0.931765	0.00057	0.89	0.970909
nutr_chol	Cholesterol intake	diet	0.00813	0.15	0.798072	0.00566	0.22	0.509538	0.01361	0.07	0.898647	0.01602	0.06	0.96
nutr_choline	Choline (dietary)	diet	0.00785	0.16	0.798072	0.00808	0.02	0.192	0.0051	0.32	0.898647	0.00246	0.55	0.970909
nutr_fat_g	Fat intake	diet	0.003	0.68	0.871579	0.00478	0.51	0.661622	0.00116	0.83	0.898647	0.00034	0.94	0.98087
nutr_fe	Iron intake	diet	0.00399	0.52	0.805161	0.00415	0.78	0.813913	0.0024	0.59	0.898647	0.003	0.49	0.970909
nutr_fiber	Fiber intake	diet	0.00379	0.55	0.814545	0.00525	0.34	0.58988	0.00145	0.77	0.898647	0.00056	0.89	0.970909
nutr_gpcho	Glycerophosphocholine (dietary)	diet	0.00458	0.45	0.798072	0.00572	0.21	0.509538	0.00124	0.81	0.898647	0.00043	0.92	0.974118
nutr_isoleucine	Isoleucine (dietary)	diet	0.00482	0.41	0.798072	0.00496	0.43	0.661622	0.00236	0.6	0.898647	0.00093	0.8	0.970909
nutr_k	Potassium intake	diet	0.00523	0.36	0.798072	0.00538	0.29	0.5568	0.00193	0.67	0.898647	0.00235	0.57	0.970909
nutr_kcal	Calorie intake	diet	0.00404	0.52	0.805161	0.00483	0.49	0.661622	0.00163	0.72	0.898647	0.00136	0.72	0.970909
nutr_leucine	Leucine (dietary)	diet	0.00478	0.42	0.798072	0.00485	0.49	0.661622	0.00228	0.61	0.898647	0.00082	0.83	0.970909
nutr_mg	Magnesium intake	diet	0.004	0.52	0.805161	0.0061	0.14	0.4032	0.00154	0.75	0.898647	0.00059	0.89	0.970909
nutr_na	Sodium intake	diet	0.00568	0.32	0.798072	0.00574	0.21	0.509538	0.00279	0.54	0.898647	0.00344	0.44	0.970909
nutr_p	Phosphorus intake	diet	0.00469	0.43	0.798072	0.00688	0.07	0.336	0.00151	0.75	0.898647	0.00068	0.86	0.970909
nutr_pcho	Phosphocholine (dietary)	diet	0.00489	0.4	0.798072	0.00659	0.09	0.35027	0.00466	0.36	0.898647	0.00355	0.44	0.970909
nutr_protein_g	Protein intake	diet	0.00393	0.52	0.805161	0.00562	0.23	0.509538	0.00229	0.61	0.898647	0.0026	0.53	0.970909
nutr_ptdcho	Phosphatidylcholine (dietary)	diet	0.00588	0.3	0.798072	0.00619	0.13	0.382041	0.00303	0.5	0.898647	0.00339	0.45	0.970909
nutr_satfat	Saturated fat intake	diet	0.00239	0.78	0.928264	0.00397	0.86	0.878298	0.00118	0.82	0.898647	0.00092	0.81	0.970909
nutr_sm	Sphingomyelin (dietary)	diet	0.0027	0.73	0.903051	0.00487	0.48	0.661622	0.0015	0.75	0.898647	0.00164	0.68	0.970909
nutr_sugar_compl	Starch intake	diet	0.00448	0.46	0.798072	0.00457	0.6	0.72	0.00283	0.53	0.898647	0.00307	0.48	0.970909
nutr_sugar_simpl	Sugar intake	diet	0.00737	0.19	0.798072	0.00557	0.25	0.537313	0.00178	0.69	0.898647	0.00105	0.78	0.970909
nutr_total_choline	Total choline (dietary)	diet	0.00767	0.18	0.798072	0.00749	0.04	0.274286	0.00234	0.6	0.898647	0.00143	0.7	0.970909
nutr_tryptophane	Tryptophan (dietary)	diet	0.00528	0.36	0.798072	0.00489	0.47	0.661622	0.0026	0.56	0.898647	0.00117	0.76	0.970909
nutr_tyrosine	Tyrosine (dietary)	diet	0.00473	0.42	0.798072	0.00442	0.67	0.736489	0.00228	0.6	0.898647	0.00108	0.78	0.970909
nutr_unsatfat_mono	Monounsaturated fat intake	diet	0.00469	0.43	0.798072	0.00678	0.08	0.338824	0.00295	0.52	0.898647	0.00177	0.65	0.970909
nutr_unsatfat_poly	Polyunsaturated fat intake	diet	0.00248	0.77	0.924	0.00482	0.49	0.661622	0.00166	0.72	0.898647	0.00097	0.79	0.970909
nutr_valine	Valine (dietary)	diet	0.00509	0.38	0.798072	0.00491	0.45	0.661622	0.00246	0.58	0.898647	0.00107	0.78	0.970909
nutr_vita	Vitamin A intake	diet	0.00327	0.64	0.850909	0.00425	0.75	0.794118	0.0055	0.3	0.898647	0.00488	0.34	0.970909
nutr_vitb1	Vitamin B1 (thiamin) intake	diet	0.0058	0.31	0.798072	0.00533	0.31	0.57974	0.00124	0.81	0.898647	0.00059	0.88	0.970909
nutr_vitb12	Vitamin B12 (cobalamin) intake	diet	0.00205	0.84	0.945	0.0048	0.51	0.661622	0.00117	0.83	0.898647	0.00107	0.77	0.970909
nutr_vitb2	Vitamin B2 (riboflavin) intake	diet	0.00546	0.34	0.798072	0.00658	0.09	0.35027	0.00243	0.58	0.898647	0.00287	0.5	0.970909
nutr_vitb3	Vitamin B3 (niacin) intake	diet	0.00422	0.49	0.805161	0.00681	0.07	0.336	0.00444	0.37	0.898647	0.00292	0.49	0.970909
nutr_vitb6	Vitamin B6 (PLP) intake	diet	0.00407	0.51	0.805161	0.00495	0.44	0.661622	0.00124	0.81	0.898647	0.00149	0.69	0.970909
nutr_vitb9	Vitamin B9 (folate) intake	diet	0.00581	0.31	0.798072	0.00849	0.02	0.192	0.0026	0.56	0.898647	0.00123	0.74	0.970909
nutr_vitc	Vitamin C intake	diet	0.00686	0.22	0.798072	0.00478	0.51	0.661622	0.00489	0.33	0.898647	0.00637	0.26	0.970909
nutr_vitd	Vitamin D intake	diet	0.00571	0.31	0.798072	0.00482	0.5	0.661622	0.00544	0.3	0.898647	0.00475	0.34	0.970909
nutr_vite	Vitamin E intake	diet	0.00174	0.88	0.945672	0.00422	0.76	0.798832	0.00146	0.76	0.898647	0.00103	0.78	0.970909
nutr_zn	Zinc intake	diet	0.00391	0.53	0.81	0.00638	0.11	0.377143	0.00155	0.74	0.898647	0.00135	0.72	0.970909
APPENDIC	Have you ever received an appendectomy?	other conditions	0.00602	0.28	0.798072	0.00712	0.05	0.288	0.00567	0.29	0.898647	0.0049	0.33	0.970909
CHOLECYST	Have you ever received a cholecystectomy?	other conditions	0.00652	0.24	0.798072	0.00631	0.12	0.382041	0.01078	0.12	0.898647	0.00904	0.16	0.970909
GOUT	Do you have gout?	other conditions	0.01154	0.29	0.798072	0.01076	0.28	0.552329	0.01113	0.33	0.898647	0.01273	0.26	0.970909
BLOAFLACT	Bloating/flatulence ?	stool	0.01383	0.03	0.48	0.00892	0.01	0.16	0.01929	0.03	0.898647	0.02003	0.03	0.96
FRECMOSEL	Average stool frequency?	stool	0.02961	0.03	0.48	0.0164	0.22	0.509538	0.03133	0.06	0.898647	0.03714	0.04	0.96
STOOLREG	Stools regular?	stool	0.00545	0.34	0.798072	0.00636	0.11	0.377143	0.00195	0.67	0.898647	0.00158	0.68	0.970909
TYPE	BristolStoolScore	stool	0.03273	0.16	0.798072	0.02746	0.17	0.470769	0.02724	0.35	0.898647	0.02706	0.36	0.970909

## Sheet: ST2
Supplementary Table 2: Host variables affect the gut microbiome, metabolome and phenome in healthy individuals.
VariableID	DisplayName	Group	Description	AGE	Sex	France	Denmark	Germany	nutr_kcal	aHEI	DASH	DDS	food_37_animal_fats	food_37_beer	food_37_bread	food_37_breakfast	food_37_cereals	food_37_cheese	food_37_coffee	food_37_cookies_pastry	food_37_diet_soda	food_37_eggs	food_37_fruit_juices	food_37_fruits	food_37_lean_fish	food_37_milk	food_37_nuts	food_37_offal	food_37_oily_fish	food_37_other_alcoholic_beverages	food_37_other_hot_beverages	food_37_otherdairy	food_37_pizza_lasagnes_raviolis	food_37_plant_fats	food_37_potatoes	food_37_poultry	food_37_processed_meat	food_37_pulses	food_37_red_meat	food_37_sauces	food_37_savoury_snacks	food_37_soups	food_37_sweetened_beverages	food_37_sweets_spreads	food_37_tea	food_37_vegetables	food_37_water	food_37_wine	food_37_yogurt
_Clostridium_	_Clostridium_	genus	_Clostridium_	0.0564104	0.0116889	0.00414294	0.0143466	-0.0187696	0.0492583	-0.0070413	0.0400092	-0.0149216	0.0691321	-0.0908583	0.0723261	0.0389815	0.034661	-0.053219	0.0138585	0.0337567	-0.0867165	0.0948882	-0.0206651	0.0164053	-0.00767783	0.0486877	-0.0700233	-0.0153892	-0.0791626	-0.0724385	-0.0363976	-0.0353923	0.108084	0.0625373	0.109036	-0.0400221	0.144487	-0.0786276	0.0290464	-0.00507749	0.0490417	-0.0317124	0.043423	-0.00452069	0.0345838	0.0457286	-0.052266	-0.0232581	-0.0732401
_Ruminococcus_	_Ruminococcus_	genus	_Ruminococcus_	-0.0452524	-0.0447738	0.0418935	-0.174924	0.137551	-0.0711601	-0.196253	-0.0674218	-0.0474422	0.122488	-0.0236583	-0.0447755	-0.138116	0.0149339	0.0121598	-0.121703	-0.0115798	-0.082201	-0.022357	0.104634	-0.0417821	0.129861	0.0284105	-0.181061	-0.0312128	-0.0562879	0.0102227	-0.0039809	0.0714454	0.0103208	0.115673	0.0301267	-0.0391731	0.0747467	-0.0316687	-0.0403915	0.0270845	0.0881355	-0.0139587	-0.0660131	-0.0164094	0.0605289	-0.104836	0.0772945	-0.152513	-0.123928
Acidaminococcus	Acidaminococcus	genus	Acidaminococcus	-0.114274	0.0763711	0.20694	-0.0620292	-0.14101	-0.0157037	-0.0668034	-0.0321749	-0.0954763	0.0373038	0.0181976	-0.0368375	-0.0522548	0.160211	-0.141031	-0.0382287	0.0271835	0.0477783	0.0143608	-0.0282077	-0.0909591	0.0939443	0.0389643	-0.11871	-0.00324535	-0.0335865	0.0300871	-0.0694497	0.102245	0.0204979	0.018553	-0.0484255	0.0550359	-0.0333739	0.0629769	0.0542976	0.0180135	0.0580963	0.0219229	0.0252974	-0.101279	0.0603905	-0.0248419	0.0217828	0.0211968	-0.0739745
Actinomyces	Actinomyces	genus	Actinomyces	0.0226866	0.0527061	0.106085	-0.00115255	-0.103637	0.0658031	-0.00434379	0.0137797	-0.0106095	0.125479	0.0762712	0.0539089	-0.0173623	0.0583619	0.0563229	0.0434305	0.047713	-0.00215971	0.0927958	-0.0225914	0.0320081	0.0273014	0.0847405	-0.0615699	0.0955363	0.121606	0.0602468	0.0271611	0.20557	0.0506881	0.0250061	-0.0273274	0.0347923	0.155518	-0.0362479	0.0694853	0.0308442	0.109524	0.0327568	-0.00594132	0.00153841	-0.0182463	0.0314313	0.0398748	0.0110809	-0.0448799
Akkermansia	Akkermansia	genus	Akkermansia	0.12261	-0.0851929	-0.0774585	0.174272	-0.101745	0.124205	0.0727468	0.0581542	0.0144069	-0.0146445	0.0169308	0.095238	0.0954882	-0.0974912	-0.0306421	0.116244	-0.101923	0.115138	0.0662266	-0.0404547	-0.0339866	-0.0329869	0.0916604	0.0776791	0.00211907	-0.00530406	-0.0311866	-0.00805385	0.0289511	-0.00227071	-0.0721997	0.0829336	0.00213505	-0.0854999	-0.0255595	0.0559396	-0.0208989	0.0133225	0.0441776	0.0533646	-0.0697813	0.0630754	0.0712758	-0.0316734	0.0744726	0.043005
Alistipes	Alistipes	genus	Alistipes	0.0358279	-0.0757097	0.060074	0.0788736	-0.140041	0.0294793	-0.058311	-0.0456908	-0.0540132	0.0424453	-0.0247568	0.118197	-0.055608	-0.0636737	0.00708829	0.0179563	0.0211832	0.0442659	0.062124	-0.0745888	-0.10273	0.0513248	-0.0811845	-0.150284	-0.0631453	0.088696	-0.00619668	-0.0842085	0.0654107	-0.0794075	0.0441895	0.0747656	0.015399	-0.0454031	-0.0922005	0.0796402	0.0326899	0.0388505	0.019049	-0.0519757	-0.0380152	-0.0163911	0.0562057	-0.0206452	0.066083	-0.0328286
Anaerotruncus	Anaerotruncus	genus	Anaerotruncus	-0.175857	-0.0611364	-0.0700314	-0.0198745	0.0895248	-0.103092	-0.164596	-0.159074	-0.0694054	-0.0280982	-0.101459	-0.0729683	-0.0349644	0.0251089	-0.0187358	0.00789439	-0.0759561	-0.00948535	0.108677	-0.0468414	-0.187165	0.134709	0.0445093	-0.0450728	-0.129826	-0.142765	-0.0423038	-0.0277726	-0.0323017	0.0482371	0.0260832	0.0523548	0.0734221	0.0292696	-0.191146	0.0163859	-0.0550554	0.0931041	-0.111365	0.120868	0.00999153	-0.0270504	-0.108562	0.064551	-0.0953937	-0.033348
Bacteroides	Bacteroides	genus	Bacteroides	-0.0701757	-0.157464	-0.00859607	-0.112512	0.123591	-0.0861008	-0.102769	-0.0757369	-0.075946	0.0119429	-0.0711172	-0.097364	-0.0521169	-0.0791516	-0.0285761	-0.0564838	-0.00972911	-0.07994	-0.0257297	0.0883132	-0.0981939	0.00516031	-0.0411237	-0.0586741	-0.0694126	-0.102783	-0.0699131	-0.0771728	-0.000476155	0.0294441	0.0538751	0.00639806	0.016187	-0.0123266	-0.0448011	-0.0792699	-0.10418	0.118104	-0.0415184	-0.0866363	0.014793	-0.0406409	-0.100577	0.0791977	-0.113601	-0.0701039
Bifidobacterium	Bifidobacterium	genus	Bifidobacterium	-0.107555	-0.0106754	0.0177875	-0.0146506	-0.00258738	0.0573383	-0.0175186	0.0825737	0.00186456	0.0348621	0.0285017	0.0816555	0.022023	0.0862685	-0.0456978	0.063441	0.0892877	-0.0789713	0.0293656	-0.0520157	-0.0319987	0.107374	0.0501526	-0.134928	-0.0661528	-0.055405	0.0124925	-0.0567726	0.0946368	0.158165	0.0885251	0.0468336	0.0993485	-0.017351	0.105924	-0.0461243	0.0458503	0.0529579	-0.014685	0.00050123	0.0480231	-0.0694904	0.025953	0.0590118	-0.134682	-0.0569124
Bilophila	Bilophila	genus	Bilophila	-0.0915271	-0.148285	0.0589191	-0.174491	0.120287	-0.0545289	-0.0985741	-0.0365143	-0.0795837	-0.0563893	-0.0417391	-0.107501	-0.0480001	0.0227089	0.0923007	-0.0855673	0.0302064	-0.0176765	-0.0406009	0.134074	-0.01658	0.157294	0.0082405	-0.0675403	0.0327222	-0.00295753	-0.0167592	0.0494332	0.0771937	-0.069864	0.0572855	-0.0910286	-0.0199226	-0.0346287	-0.0437115	-0.0855479	-0.011422	-0.00236199	-0.0383515	-0.13065	0.00368666	-0.0207405	-0.057963	0.180733	-0.0877878	0.00751188
Capnocytophaga	Capnocytophaga	genus	Capnocytophaga	0.120647	0.207037	0.02052	0.229093	-0.254632	0.0316621	0.00309605	0.0648055	0.0231552	-0.0931466	0.116311	-0.0630144	0.202684	0.018621	-0.0647075	0.108308	-0.0177491	0.108785	-0.0381565	-0.12714	0.0195482	0.0132254	0.0720646	-0.0405721	-0.0497767	0.0613252	0.104192	-0.15424	0.0473918	0.00505639	-0.0707861	0.0636988	-0.0783596	-0.0708557	0.0142248	0.0544885	-0.0852523	0.10763	0.109182	0.059564	-0.146202	-0.0206174	0.0140103	-0.0456809	0.112166	-0.0783063
Clostridiales	Clostridiales	genus	Clostridiales	-0.00141584	-0.161393	0.0449842	-0.116519	0.0747501	-0.201882	-0.133829	-0.08919	-0.0890122	0.00764299	-0.115338	-0.129903	-0.0690105	-0.0660549	-0.09465	-0.0631146	-0.149227	-0.0907072	0.0253689	0.0282422	-0.185043	0.0395437	-0.0404254	-0.0471552	0.0384199	-0.0729628	-0.0518176	0.0200247	-0.00982439	-0.0361054	-0.0194459	-0.103249	-0.0445362	-0.0491287	-0.0150761	-0.195214	0.0452731	0.0276932	-0.00850776	-0.0599995	-0.055762	0.131776	-0.118763	-0.0582854	-0.12944	-0.0221524
Clostridium	Clostridium	genus	Clostridium	-0.0316425	-0.0202147	0.125979	-0.141335	0.0201108	-0.0448863	-0.0612075	-0.0117656	0.00968627	0.0176241	-0.00733303	-0.0200192	-0.106373	0.0199858	-0.136248	-0.0548212	-0.029283	-0.156963	-0.0135487	0.07626	-0.040827	0.0258018	0.0552832	-0.0574093	-0.0366498	-0.0786649	0.0825911	-0.0715002	0.095045	0.100467	-0.0436774	0.0246299	0.0126843	0.0149066	0.0452138	-0.0324576	0.00277486	0.0602494	-0.0027622	-0.069525	-0.0439837	0.0160569	-0.0917344	0.0389053	-0.0634483	0.00239656
Collinsella	Collinsella	genus	Collinsella	-0.0473803	0.0609123	-0.0974024	0.0140468	0.0818676	-0.064402	-0.0559457	-0.0392631	-0.0679695	-0.0808549	0.0749962	-0.043094	0.109846	-0.0727616	0.011036	0.0319974	-0.0643081	-0.00887953	-0.0593292	-0.0302146	-0.0983291	0.126319	-0.0077805	-0.128059	0.0424852	-0.0109494	0.0035959	-0.0545466	-0.049246	0.0669563	0.023352	0.0776824	-0.00800237	-0.0668425	-0.0522381	0.0208816	-0.0586329	0.0933299	0.00899319	0.0481216	-0.0294485	-0.0721049	-0.0226095	0.0583347	3.41e-05	-0.113015
Coprococcus	Coprococcus	genus	Coprococcus	0.098949	0.160962	0.00800338	0.0295839	-0.0381714	0.0883166	-0.0810943	-0.0328422	-0.0607123	0.0721436	0.0305572	0.107148	-0.00336554	0.0346278	0.163377	-0.0159941	-0.0209935	0.00903322	-0.00426093	-0.000379592	0.0442419	0.21549	-6.44e-06	-0.0933409	-0.0457477	0.124442	-0.0320722	-0.0467978	0.0268345	-0.0137752	-0.026192	0.0865215	0.0950097	0.128489	-0.00857875	0.127462	-0.0385839	0.0767646	0.0108604	-0.0920368	-0.0288425	-0.0673241	-0.00600881	0.164652	-0.0199492	-0.141181
Desulfovibrio	Desulfovibrio	genus	Desulfovibrio	0.0470659	0.0472304	0.00310568	0.109874	-0.115468	-0.0593267	-0.0611869	-0.168433	0.06453	0.0157329	0.0207338	-0.0659521	0.0974966	-0.00162048	-0.0960961	-0.00361079	-0.117597	0.123536	-0.0141129	-0.0347676	-0.114128	0.01943	-0.045396	-0.0542407	-0.035062	0.00376961	-0.0538231	0.0451789	0.0492652	-0.0159064	-0.138325	0.0592833	-0.00591172	-0.0169635	0.0159728	0.0796671	0.025783	0.0486173	0.0654787	0.0691532	-0.0172034	0.0955126	-0.0492879	-0.107914	0.0690429	-0.0367663
Dialister	Dialister	genus	Dialister	0.0219494	-0.0108997	-0.107855	0.118046	-0.0141936	0.0961219	0.00182706	-0.0421523	-0.00241071	0.0416567	-0.0505874	0.0536885	0.131523	-0.063487	-0.022168	0.0761181	0.0224177	0.0607081	0.0209368	-0.0449493	-0.0317223	0.102087	-0.0130333	-0.0161517	-0.0415406	-0.0181217	-0.0610035	-0.0898133	0.020274	0.0399658	-0.0790093	0.136935	0.0848071	0.0584857	-0.0462512	0.0835933	0.0823007	0.0748911	0.00994933	0.136144	0.0490016	-0.0690693	-0.0211184	0.0127305	0.0549398	0.0251554
Dorea	Dorea	genus	Dorea	0.0769362	0.0202144	0.0971258	-0.0935219	-0.00029287	-0.0371389	-0.151759	-0.0977465	0.0281347	0.0644583	-0.000336845	-0.0434079	-0.0526016	0.0353599	0.024666	-0.0497886	0.0472431	-0.0696252	0.0260609	0.039626	-0.0705197	0.138701	-0.0290727	-0.158306	0.027075	0.0472049	0.102067	0.0588427	0.160351	-0.00101508	-0.0412561	0.0485975	-0.00248444	0.0441651	0.00146836	0.0627421	-0.00831333	0.147078	-0.058838	-0.059356	-0.00613847	0.0357599	-0.0784602	0.131344	0.0155005	-0.0897978
Eggerthella	Eggerthella	genus	Eggerthella	0.0728919	-0.194784	-0.0683103	-0.107187	0.177143	-0.0659409	-0.0376849	-0.0606627	-0.0751382	0.0345944	-0.0555759	-0.0818313	-0.145835	-0.128596	0.00214523	0.0116649	0.0753914	-0.113641	-0.0534391	0.0969063	-0.013272	0.0637758	-0.0194835	0.0829782	-0.0861016	-0.0296103	-0.175163	-0.0118674	0.014281	-0.0487023	-0.0252528	0.0511606	-0.0283468	0.0911332	-0.0508593	-0.112745	-0.00850657	-0.00834098	0.0395816	-0.135889	0.0700315	-0.00361006	-0.070233	-0.0185813	-0.152454	-0.00859511
Escherichia	Escherichia	genus	Escherichia	0.157022	-0.107358	0.192096	-0.108268	-0.0790411	0.0106177	0.0164451	0.0730839	0.160767	-0.00395163	-0.0688804	-0.0622527	-0.0193716	0.0568475	-0.0415437	-0.171415	0.133953	0.0251416	0.0229773	0.0476563	0.0616845	0.0236997	-0.000259248	-0.0385848	0.00999108	0.0826475	0.0707022	0.103046	0.110119	-0.00507365	-0.0115364	-0.0608514	0.0878325	0.00643721	0.141078	-0.0223413	0.0594501	0.0601384	0.0321281	-0.0247057	-0.098638	0.126973	0.118489	0.0976097	-0.00770906	-0.00793338
Eubacterium	Eubacterium	genus	Eubacterium	-0.0112629	-0.0268265	0.138426	-0.219776	0.0880563	-0.00107244	-0.074451	-0.00819991	-0.0554055	-0.0336551	-0.0549486	-0.0233102	-0.0465452	0.0870228	0.0445116	-0.180379	0.107042	-0.044854	0.0107393	0.128269	0.0287262	0.100646	-0.045809	-0.167527	-0.0533753	0.0548405	-0.038067	-0.0733291	0.0929095	-0.0663308	0.0705147	0.0239171	0.0184598	0.0484757	0.0462251	-0.0678763	-0.0407357	0.0723543	-0.115522	-0.133438	0.0248094	0.0559989	-0.036678	0.130141	-0.163205	0.0190415
Faecalibacterium	Faecalibacterium	genus	Faecalibacterium	-0.0281201	0.0201199	0.134573	-0.129976	0	-0.0158936	-0.120469	0.0044856	-0.0646012	0.0406371	-0.0668681	0.00822015	-0.0942826	0.0250923	0.0812769	-0.114948	0.0726922	-0.128262	0.0968987	0.0608619	-0.000198299	0.0783745	0.0109161	-0.221631	-0.0534172	-0.0538228	-0.0546665	-0.064333	0.112272	-0.0695826	0.0841365	0.0309781	0.0324224	0.043606	0.0133585	-0.0559335	-0.0589181	0.000817885	-0.0810213	-0.119467	-0.0659954	-0.000888962	-0.0639994	0.0873339	-0.102016	-0.131431
Haemophilus	Haemophilus	genus	Haemophilus	0.0176245	0.0964625	0.14497	0.00250376	-0.145797	0.0233854	0.0789843	0.1516	0.0396561	-0.029391	-0.0724677	0.0544402	0.138003	0.0443773	-0.00729432	-0.0818106	0.0258326	-0.0210771	-0.00533754	-0.0538168	0.103308	0.142479	-0.0502729	-0.0515556	-0.069619	0.115285	-0.057963	-0.0659334	0.0663815	0.0542886	-0.0375667	-0.0617331	0.0662608	0.0111546	0.132863	0.0118602	-0.09888	0.0782645	0.0357175	-0.091844	-0.131214	-0.0587488	0.0510492	0.0475086	0.00855684	-0.0633627
Holdemania	Holdemania	genus	Holdemania	0.0606795	-0.0292479	-0.114305	0.101077	0.00953782	-0.0292138	-0.0578269	-0.123856	-0.0376554	0.013443	-0.0179024	-0.080331	-0.0217382	-0.131455	-0.0374044	0.0737857	0.00555053	0.101917	0.12306	-0.0148051	-0.0672534	0.123336	-0.0226684	-0.0341454	-0.184915	-0.00565431	-0.0719013	-0.0379055	-0.0374972	-0.0738207	-0.122557	0.116388	-0.045998	0.0139466	-0.177095	0.0191025	-0.0649883	0.0861722	0.0676957	0.0105519	-0.0820137	-0.0373369	-0.0882101	0.0317955	0.0455292	0.00606183
Klebsiella	Klebsiella	genus	Klebsiella	0.120719	-0.0508077	0.117857	-0.0535189	-0.0616985	0.0350511	0.0568823	0.115641	0.0457047	-0.0268829	-0.0484156	0.0935564	-0.0547503	-0.000186648	-0.0174685	-0.103455	-0.015621	-0.0369563	0.000477307	-0.103129	0.0957233	0.0450875	0.0204302	-0.0536903	0.0919521	0.0278417	-0.034059	0.029194	0.00346511	-0.0652997	0.0416391	-0.0646527	-0.0194657	-0.0646908	0.0465028	-0.105567	0.030967	-0.0425057	-0.0284751	-0.0146577	-0.0219355	0.0863642	0.0735543	-0.0443183	-0.0494905	0.0632206
Lactobacillus	Lactobacillus	genus	Lactobacillus	0.0148956	0.00142968	-0.0180563	0.0277106	-0.0105071	0.0811674	0.0654519	0.117881	0.0467007	0.0351887	-0.0275875	0.111864	0.0382968	0.0288805	0.0935754	0.0421798	0.0549469	-0.0412442	0.0847092	-0.0734629	0.0563574	0.00342105	-0.0248556	-0.0198044	0.12903	0.0298885	-0.044623	0.0927065	0.0500298	-0.0212192	-0.0189108	-0.00219618	0.0151598	0.109744	0.0275779	-0.0940985	-0.00893282	-0.0043899	0.0501172	0.052238	0.0387758	0.00409738	0.0687482	-0.0107138	-0.0137181	-0.0129919
Lactococcus	Lactococcus	genus	Lactococcus	0.00346182	-0.0489094	0.111581	-0.187745	0.0818129	0.0283842	0.0215653	0.12395	0.0212401	-0.0412248	-0.0139184	0.0562171	-0.0697384	0.0431055	0.15256	0.0351678	0.101338	-0.0490153	-0.0574184	-0.0282944	0.089106	0.075789	-0.0268567	-0.0203154	0.181903	0.114294	-0.035152	0.0747731	0.149408	-0.0110603	0.023323	-0.0894994	0.054539	0.123862	0.162334	-0.0481351	-0.0848352	-0.14149	0.09474	-0.155363	0.0368877	0.0745834	0.0288608	0.0947634	-0.0224971	0.00674693
Megasphaera	Megasphaera	genus	Megasphaera	0.0563713	0.134913	-0.0595625	0.120132	-0.0640425	0.0348584	-0.0851016	-0.0223921	-0.0566052	0.0219666	0.0362012	-0.0298046	0.0760772	-0.0819966	-0.084667	0.0556311	-0.0177078	0.0036912	0.0530984	-0.0615735	-0.0477057	-0.00307402	0.103571	-0.0601085	-0.00371985	-0.0248628	0.0324999	-0.0828293	-0.0240254	-0.0189329	-0.0123418	0.0124659	0.0452061	0.0576077	-0.030064	0.0597514	-0.10833	-0.0440103	0.0827184	0.0819622	-0.110492	-0.0404779	0.0176955	-0.0734431	0.10765	-0.0907357
Methanobrevibacter	Methanobrevibacter	genus	Methanobrevibacter	0.164164	0.0443956	0.0713271	0.0597331	-0.13158	0.10815	-0.0238394	-0.00916911	0.0956768	0.0156112	0.0549663	0.0652311	0.170542	0.0810597	0.0444187	0.0214082	0.0457108	0.0360208	0.0494682	-0.0712245	0.00599654	0.0151621	0.0540627	-0.133769	0.0259952	0.108345	0.0242194	0.00693164	0.0503281	-0.00156024	-0.0198377	0.0433767	0.0906637	0.0182028	0.0416614	0.0646377	0.0313105	-0.00221383	0.0485411	0.0320283	-0.0483166	0.0259976	0.0121842	-0.0161071	0.0835896	0.0912494
Odoribacter	Odoribacter	genus	Odoribacter	-0.0102764	-0.115054	0.121138	-0.106598	-0.0106411	0.027508	-0.0620616	-0.0769559	-0.0787312	-0.00680379	-0.0843162	-0.0119012	-0.0485178	-0.00197226	0.105458	-0.101889	-0.0110126	0.0490704	0.0458914	0.0857527	-0.0534974	0.115434	-0.0389284	-0.0866791	-0.105415	0.0834623	-0.0846114	0.00606255	0.165333	-0.0747668	0.059501	-0.0397363	0.0620229	0.051343	0.0162432	-0.0147232	0.0672081	0.0555746	0.0308743	-0.146656	0.0129633	0.0263753	-0.0154309	0.0976659	0.0319951	-0.039434
Parabacteroides	Parabacteroides	genus	Parabacteroides	-0.00796075	0.00623453	-0.0145249	-0.0402729	0.0555494	-0.0471698	-0.148517	-0.134417	-0.0727367	0.0252291	0.0354417	-0.074354	0.00832919	-0.0222689	-0.0377182	0.00405681	0.0162451	-0.0249933	0.033684	0.0298265	-0.166678	0.147821	0.00100002	-0.117354	-0.169758	-0.0527734	-0.0768734	-0.124075	-0.00462605	0.0176638	0.0335842	0.0629683	0.0717266	0.0321499	-0.0485348	-0.00919478	-0.0523937	0.00711496	0.0717152	-0.0450239	-0.0398181	-0.0723806	-0.108982	0.0293467	-0.0510903	-0.0548671
Parasutterella	Parasutterella	genus	Parasutterella	-0.0317176	-0.0608368	0.0500707	-0.0559709	0.00778539	-0.0174565	0.112165	0.0843137	0.113687	0.0425056	0.0530199	-0.105182	0.0196546	-0.00311525	-0.0108297	-0.0167001	0.0412159	0.0204003	0.0674104	0.0275043	0.0504514	0.0662879	0.0211644	0.112389	-0.0273385	0.0082657	0.0719765	0.0561932	0.0277392	-0.0618269	-0.0428371	0.0183277	0.0443825	-0.124234	0.0600512	-0.0864046	-0.0649612	0.000566763	-0.00975379	-0.0175546	-0.00605162	-0.0093983	0.0371071	0.0367965	-0.0317268	-0.0275895
Phascolarctobacterium	Phascolarctobacterium	genus	Phascolarctobacterium	0.067787	0.0989694	-0.058975	0.0526824	0.00437646	0.0788632	0.0678398	0.0968908	0.0224691	0.025941	0.152569	0.0320335	0.0215739	0.0631948	0.0977648	-0.0525557	0.0299153	0.059616	-0.00220342	0.00339019	0.112828	-0.0727327	0.0654602	0.019412	0.0745263	0.0878272	0.0774834	0.0480338	0.112913	0.0236633	0.0477261	0.0464115	-0.104262	0.00830886	-0.0377236	0.0566625	0.0275926	0.0475909	0.0588438	-0.0147565	-0.0188668	0.128836	0.0363393	-0.0586215	0.0349277	-0.0722969
Prevotella	Prevotella	genus	Prevotella	-0.0301862	0.162279	0.0662823	-0.0175917	-0.0474934	-0.00803326	0.0403308	0.0764201	0.0331061	-0.0815402	-0.0286246	0.00144448	0.0633101	0.028128	-0.0838871	-0.0577044	0.0442924	-0.0490718	-0.0184536	0.0878554	0.103834	-0.00294621	-0.0828406	-0.0403126	0.0646817	-0.0361197	0.0516255	0.00970606	0.0335572	-0.0934861	-0.0493309	-0.031581	-0.0103447	-0.083048	0.0692816	0.0365979	0.0400669	-0.0942369	0.0577015	0.0482659	-0.0248181	-0.000469875	-0.0197506	0.0350284	0.0849849	-0.0721037
Pseudoflavonifractor	Pseudoflavonifractor	genus	Pseudoflavonifractor	0.0166656	-0.19025	-0.119105	0.0182416	0.0990192	-0.133819	-0.252423	-0.248848	-0.0765837	-0.0110423	-0.0850232	-0.127914	-0.0942325	-0.118292	-0.0687136	-0.00141113	-0.0726289	0.0445525	0.0691496	0.0875923	-0.260405	0.111562	-0.0136967	-0.165988	-0.0863477	-0.022152	-0.0769889	0.0148539	-0.012099	-0.0869918	-0.0178915	0.126593	0.0502521	0.00716866	-0.173243	0.0287311	-0.0201035	-0.00149694	0.0109981	-0.0476002	-0.0577048	0.0170724	-0.175664	-0.0797514	-0.0234635	-0.1189
Pseudomonas	Pseudomonas	genus	Pseudomonas	0.0445424	0.0491807	-0.346449	0.462099	-0.130413	0.140446	0.0608945	-0.0105048	0.0747666	-0.00219365	0.102929	0.07832	0.206644	-0.052315	-0.0355287	0.247529	-0.0889225	0.29894	0.0799953	-0.277947	-0.143471	-0.140134	0.109564	0.149522	-0.179173	-0.185356	0.0632987	-0.0198667	-0.0152733	0.103533	-0.0395254	0.230497	-0.0377255	0.0201048	-0.177218	0.202625	-0.116669	0.0537249	0.0182677	0.27343	0.0200066	-0.043009	0.00590915	-0.0386804	0.119672	-0.0907853
Roseburia	Roseburia	genus	Roseburia	-0.0680279	0.012941	-0.0055331	-0.0704277	0.0775129	-0.0520067	-0.0561679	0.00578002	0.00292272	-0.0529477	0.00912531	0.0184908	-0.0473631	0.0551789	0.026752	-0.0857051	-0.0468245	-0.00564652	-0.107207	-0.0708239	0.0281288	0.0626001	-0.0826478	-0.167596	-0.0710574	0.0108684	-0.0556318	-0.181151	0.00278983	-0.0150116	-0.0295369	-0.0497597	0.0331462	0.0836695	0.000723922	-0.0346529	0.00656728	0.102836	0.00852895	-0.0895187	-0.108516	-0.0427914	-0.0621904	0.0452729	-0.0552636	-0.1059
Rothia	Rothia	genus	Rothia	0.119622	0.00692767	0.19152	-0.0108743	-0.178105	0.0276447	-0.0280291	-0.0163903	0.0477709	0.069864	-0.0425775	0.0536126	-0.014283	0.0898189	-0.0179132	-0.096839	0.183018	-0.00598505	-0.00200208	-0.0846599	0.00217363	0.0433377	-0.0201732	-0.117513	0.041485	0.109532	-0.0414266	-0.0605863	0.199857	0.015016	-0.0414888	-0.000883999	0.0567505	0.0147415	0.100676	0.00310029	0.0616199	-0.053203	0.0934935	-0.0889829	0.0004361	0.0506618	0.0130066	-0.040924	0.0662254	-0.0197489
Ruminococcaceae	unclassified_Ruminococcaceae	genus	unclassified_Ruminococcaceae	-0.0204469	-0.181856	-0.100607	-0.038543	0.138832	-0.0253073	-0.133791	-0.128491	-0.0129617	0.0982604	-0.0246482	-0.0925966	-0.0863305	-0.0684966	-0.0355091	0.00291467	-0.0206177	0.0312301	0.10734	0.140418	-0.136377	0.00401038	0.0718457	-0.10695	-0.0409155	-0.0426535	-0.0271388	0.0236261	0.000700168	-0.0160495	-0.00357173	0.0637627	0.0580272	0.0309088	-0.0662351	0.0306747	-0.0259743	0.116891	-0.0449159	0.0028569	0.000488943	0.0372046	-0.0802175	0.080404	-0.0141269	-0.06414
Ruminococcus	Ruminococcus	genus	Ruminococcus	0.0707164	-0.104283	0.0678793	-0.144768	0.0810274	-0.0914722	-0.171557	-0.115564	-0.000674091	0.0397179	-0.00300692	-0.0561356	-0.136389	-0.0621529	0.00332964	-0.0677681	-0.0096683	-0.0176595	0.0374932	0.0512956	-0.0364669	0.0534802	-0.0806668	-0.188118	-0.0558251	-0.0423705	-0.00583705	-0.00177687	0.0606862	-0.0755903	0.0064734	0.0576052	0.0650487	0.111406	-0.025704	0.056666	-0.0126059	0.0123449	0.0190382	-0.0941636	-0.0404599	0.0149664	-0.0740721	0.0863381	-0.067727	-0.000665542
Streptococcus	Streptococcus	genus	Streptococcus	0.0514375	-0.0976712	0.094952	-0.0573537	-0.0351444	0.0563587	-0.0319647	0.0619069	0.0307025	-0.0436638	0.00278986	0.037918	0.0476317	-0.00577701	-0.0536882	0.00389343	0.055142	-0.0179709	0.078577	0.053994	0.0460677	0.0786146	0.0280877	-0.0738254	-0.00865654	0.0752716	-0.0303235	-0.0419091	0.143635	0.0260541	-0.0312068	-0.0223547	0.082035	0.0498098	0.0187297	0.0383342	-0.0177394	0.060522	0.0757401	-0.119444	-0.0339086	0.0184456	-0.00293243	0.0417171	-0.0325482	0.118373
Sutterella	Sutterella	genus	Sutterella	-0.169068	0.135144	0.0526873	-0.0265365	-0.0249107	-0.0418764	0.0351343	-0.0190281	0.0312822	-0.0260349	0.0122864	-0.00403528	0.0452588	0.0951044	-0.155774	-0.0858229	-0.00139293	-0.0383445	0.0198567	0.00858352	-0.000429567	0.020071	-0.0674276	-0.045221	-0.143909	-0.0742205	0.118918	-0.0263187	-0.0826119	0.063914	-0.074445	-0.0318864	-0.0533292	-0.119147	-0.00284663	-0.0578512	-0.0152962	0.0570925	-0.0410565	0.0538142	0.0300209	0.0706034	0.0124655	0.000191507	0.124089	-0.0899216
unclassified	unclassified	genus	unclassified	0.0773542	-0.0785907	0.0936185	-0.0227125	-0.0692641	0.0581246	-0.0513446	-0.0266776	-0.0439902	-0.00191951	-0.068365	0.00124319	0.0385688	-0.013279	0.0283006	-0.0982711	-0.0852253	-0.0434946	0.0716966	0.00554544	0.0124038	0.106678	0.00885354	-0.126736	-0.102624	-0.0135548	-0.0683213	-0.0400945	0.0730068	-0.148111	-0.0450257	-0.00208196	0.0406515	0.0253974	-0.0234202	0.0317321	0.0184117	0.0341689	-0.060073	-0.12156	-0.0662714	0.079458	0.0163225	0.0834839	0.0102832	-0.0365686
Veillonella	Veillonella	genus	Veillonella	0.0688547	0.00204151	0.0595934	0.0161162	-0.075367	0.012166	0.0420154	0.0748447	0.0174589	-0.0155039	-0.0191638	0.016729	0.0899006	-0.0152947	-0.0541277	-0.0417813	0.024374	-0.0775826	-0.00413791	-0.0725812	0.0223743	0.180241	-0.0118891	-0.0261803	-0.11363	0.104317	-0.05074	-0.112979	0.0303059	0.00476447	-0.0935981	0.0452329	-0.0311822	-0.00450871	0.115844	-0.0531849	-0.0854971	0.0757629	0.0689975	-0.0506063	-0.102388	-0.040199	-0.00477043	-0.0793188	0.0779509	-0.0451761
Victivallis	Victivallis	genus	Victivallis	0.038836	0.0820188	0.117611	0.0612548	-0.178867	0.0574605	0.130516	-0.00911782	0.0233721	-0.0414062	0.00558037	-0.0117479	0.0977122	0.0384296	-0.0226	0.0389328	-0.0605871	0.0220549	0.0687176	-0.0180536	0.0576182	0.0911032	-0.0130361	0.113888	-0.12587	0.176991	0.0401254	0.0113288	-0.0153086	-0.0587996	-0.0455499	-0.0255588	-0.000397354	-0.0593203	0.0649832	0.0597555	0.0336368	-0.117514	0.100405	0.0566353	-0.0579267	0.0116575	0.0762168	0.0654911	0.0922725	0.0695659
TaxonAdjustedID.MGS.down.10000000.v6.10	CAG00014	MGS	Bacteria;Firmicutes;Clostridia;Clostridiales;Lachnospiraceae;Eisenbergiella;Eisenbergiella tayi	0.0796048	-0.137672	0.00051211	0.029776	-0.0309662	0.0231242	0.0155524	-0.043582	-0.0532579	0.0310135	-0.0340558	0.0345981	-0.0372491	-0.0310276	0.0353414	0.0371834	-0.059422	-0.0271224	0.142115	-0.0312064	-0.0528145	0.058088	0.0152961	-0.00649956	-0.0812366	0.0301495	-0.122301	0.0727304	0.0441676	-0.112435	-0.0756112	0.0776492	0.0423065	-0.0235396	-0.162746	-0.0199361	-0.0452641	0.0687984	0.09967	-0.0275176	-0.0214218	0.0408383	-0.034663	0.0603095	-0.0423827	-0.0300657
TaxonAdjustedID.MGS.down.10000000.v6.100	CAG00102	MGS	Bacteria;Firmicutes;Clostridia;Clostridiales;Lachnospiraceae;unclassified Lachnospiraceae;unclassified Lachnospiraceae	0.0256704	-0.162823	-0.0958764	0.0525128	0.0410099	0.115683	-0.0442496	0.0139791	0.0463756	0.0579644	0.0401293	0.117448	-0.0366593	-0.101886	-0.0151766	0.102221	0.0457416	0.185807	0.139566	0.0734259	-0.037061	0.0276306	0.0924089	-0.085295	0.0195519	0.0120441	-0.00011771	0.0150427	0.0879672	0.0168723	0.049526	0.117807	0.139499	0.0632635	-0.0607945	0.0550384	0.000435507	-0.00360357	0.0525356	-0.00556629	-0.0490547	-0.07945	-0.0364729	0.0577556	0.0256903	0.0169408
TaxonAdjustedID.MGS.down.10000000.v6.1001	CAG00988	MGS	Bacteria;Firmicutes;Clostridia;Clostridiales;unclassified Clostridiales;unclassified Clostridiales;Clostridium sp. CAG:349	0.0712716	-0.0647995	-0.0399309	0.15046	-0.114464	0.136864	0.0292286	0.0121484	0.0699871	0.0635453	0.0460608	0.130842	0.110974	0.0152872	0.0410952	0.0741618	0.0679623	0.0994902	0.0529482	-0.0805432	0.0469911	-0.00123148	-0.0305889	-0.00149021	-0.0612252	0.0650303	-0.0389191	0.0866608	-0.00449203	0.0341712	-0.0664568	0.0311262	0.0809807	-0.017048	0.0100771	0.11679	0.000720693	-0.066192	0.0628928	0.109361	0.05287	0.0586853	0.0917402	-0.0906894	0.0476301	0.00691602
TaxonAdjustedID.MGS.down.10000000.v6.1007	CAG00994	MGS	Bacteria;Firmicutes;Clostridia;Clostridiales;unclassified Clostridiales;unclassified Clostridiales;unclassified Clostridiales	0.0871172	0.0186264	0.123759	0.00604858	-0.128466	0.0752799	0.116995	0.162433	0.0603997	-0.0531709	0.0184182	0.0355649	0.0824953	0.0622224	0.0296833	-0.0413667	-0.00646914	-0.0105028	-0.032705	-0.0320208	0.132995	0.0873824	0.0226334	-0.0865662	-0.0321693	0.0218941	-0.00429151	0.0519686	0.0817597	-0.0849206	0.0331333	-0.0836825	-0.0229983	-0.0326429	0.0960278	-0.0150623	0.0189599	-0.0496106	0.0808989	-0.085316	-0.0654991	0.0789098	0.189641	0.0975844	0.0722436	0.0582712
TaxonAdjustedID.MGS.down.10000000.v6.1008	CAG00995	MGS	Bacteria;Firmicutes;unclassified Firmicutes;unclassified Firmicutes;unclassified Firmicutes;unclassified Firmicutes;Firmicutes bacterium CAG:475	0.107918	-0.0915809	-0.0798285	0.117851	-0.0416855	-0.0311467	0.0571009	0.0307449	0.0202122	-0.0640659	0.0136197	-0.0173662	0.105564	-0.0299117	-0.0131399	0.0463793	-0.0353839	0.0933938	0.0866958	-0.0564348	0.0743249	-0.0545069	0.026016	0.0207311	-0.0388952	0.0691195	-0.04016	0.0730351	-0.0410801	-0.0210609	-0.0879499	-0.0176949	-0.0762406	-0.095968	-0.0401886	0.0547147	-0.0366628	-0.0774689	-0.0532439	0.0308599	-0.0376291	0.0519226	0.0395708	0.0177556	0.143985	0.0902368
TaxonAdjustedID.MGS.down.10000000.v6.1009	CAG00996	MGS	Bacteria;Firmicutes;unclassified Firmicutes;unclassified Firmicutes;unclassified Firmicutes;unclassified Firmicutes;unclassified Firmicutes	0.0701286	-0.208125	-0.0178813	-0.0315228	0.0499145	0.0205395	-0.0833778	-0.0732629	-0.00137304	0.0330321	0.0207158	0.0105162	-0.071463	-0.0638945	-0.0138362	0.00639302	0.0266445	0.00756554	0.115254	0.0818465	-0.0224512	0.0197618	0.0742808	-0.0915421	-0.0816036	-0.029412	-0.0148983	-0.0701132	0.0342493	0.00468851	0.0169991	0.0755814	0.126705	0.0886872	-0.0726786	0.0301907	0.0315806	-0.00879596	-0.0234567	0.0372571	-0.0943116	0.00112633	0.00592345	0.0541808	-0.0149725	0.0170667
TaxonAdjustedID.MGS.down.10000000.v6.1017	CAG01003	MGS	Bacteria;Firmicutes;Clostridia;Clostridiales;unclassified Clostridiales;unclassified Clostridiales;unclassified Clostridiales	0.111995	-0.0964484	-0.111435	0.169555	-0.0633492	0.0615158	-0.0934763	-0.161193	0.0112336	0.0371481	0.0204819	0.0406039	0.0341788	-0.113789	-0.0477881	0.163525	-0.0128645	0.133181	0.170978	-0.0787189	-0.111786	-0.0271321	0.0375219	-0.149811	-0.0866266	0.00664296	0.0549067	0.0147911	0.0608842	-0.00877424	-0.0419683	0.0879719	0.182909	0.0885088	-0.0950617	0.140067	-0.00744784	0.0119939	0.0432653	0.0374132	-0.00370357	0.0153673	-0.0518279	0.0373343	0.132262	0.0859574
TaxonAdjustedID.MGS.down.10000000.v6.1022	CAG01008	MGS	Bacteria;Firmicutes;Clostridia;Clostridiales;unclassified Clostridiales;unclassified Clostridiales;Clostridium sp. CAG:343	0.0238343	0.116592	0.0405726	0.0593564	-0.100808	0.0484241	-0.0614917	-0.0535348	-0.0268245	-0.00655676	0.00460928	0.0822508	0.0562545	-0.035326	0.0252764	0.0626099	0.0282297	0.00285177	-0.0516372	-0.0603295	-0.0717921	0.0718924	-0.0201465	-0.0337696	0.0182668	0.0879343	-0.0203268	-0.0106732	0.0786345	-0.0572086	0.0282314	0.104407	-0.0118973	-0.010593	0.0532486	-0.00178804	-0.0259984	0.0376063	0.0382772	0.0302701	0.0593424	0.00518597	-0.0432522	-0.0528398	-0.0560957	0.0466826
TaxonAdjustedID.MGS.down.10000000.v6.1025	CAG01011	MGS	Bacteria;Firmicutes;Clostridia;Clostridiales;unclassified Clostridiales;unclassified Clostridiales;Ruminococcus sp. 2789STDY5608817 / Eubacterium sp. 2789STDY5834872	0.0392257	-0.0936144	0.0173907	-0.0428505	0.0266526	0.0364661	-0.0808484	-0.0550975	-0.0297133	-0.0507204	-0.0549304	0.00989098	-0.049899	-0.0374017	0.0989594	-0.0842038	-0.00559247	0.0745763	0.154801	0.042253	-0.019991	0.0682322	0.107846	-0.146535	-0.102736	0.0224098	-0.00623768	-0.0537852	-0.014947	-0.0694995	0.026608	-0.0230827	0.00290654	0.0202425	-0.113902	-0.0127029	-0.00734	0.0556942	-0.0466834	-0.192483	-0.0123286	-0.030113	-0.0170598	0.0848007	0.0184712	-0.0940414
TaxonAdjustedID.MGS.down.10000000.v6.1029	CAG01015	MGS	Bacteria;Firmicutes;Clostridia;Clostridiales;unclassified Clostridiales;unclassified Clostridiales;unclassified Clostridiales	0.0901101	0.111325	0.208437	0.0851539	-0.293054	0.00837142	0.0643484	0.0631527	0.051846	-0.0548792	-0.0244817	-0.0535847	0.0201385	0.0312273	0.0377824	0.00971808	0.0375039	-0.0181403	0.0840527	-0.158737	0.0667397	0.0832952	-0.020774	0.0477792	0.0182589	0.0483863	0.00739782	-0.0856219	0.0302563	-0.0354463	-0.0411461	-0.0467909	0.0468105	0.0165552	0.128306	0.0658545	-0.0627012	-0.065405	0.0412278	-0.00679609	-0.114391	-0.0667596	0.157809	-0.0657256	0.144886	-0.0173229
TaxonAdjustedID.MGS.down.10000000.v6.1031	CAG01017	MGS	Bacteria;Firmicutes;Clostridia;Clostridiales;unclassified Clostridiales;unclassified Clostridiales;unclassified Clostridiales	-0.0211546	0.135191	-0.0485211	0.158957	-0.114669	0.125425	0.0241273	0.0151498	0.0472173	-0.0589994	0.099142	0.0972528	0.158128	-0.0488974	0.0631602	0.0751895	-0.00442881	0.0788293	-0.00263278	-0.0355129	0.0490995	-0.100971	0.0495965	-0.0180188	-0.0123762	0.0450034	0.107862	0.0318781	0.0759859	0.0642967	-0.131472	0.0667991	0.0162712	-0.0367353	-0.0518469	0.0963893	-0.0521008	0.0793801	0.0643117	0.119421	0.0392207	-0.0765322	-0.0139372	-0.060327	0.0941862	-0.00245365
TaxonAdjustedID.MGS.down.10000000.v6.1033	CAG01019	MGS	Bacteria;Actinobacteria;Coriobacteriia;Eggerthellales;Eggerthellaceae;Gordonibacter;unclassified Gordonibacter	0.0555534	0.0113165	-0.212526	0.13111	0.0758601	0.113387	0.111625	0.05717	0.106169	0.00374734	0.035123	0.0478902	0.125574	-0.0937871	0.0424445	0.0891712	-0.040621	0.112167	0.115532	-0.0475001	0.093122	0.0040994	0.0251865	0.0652911	0.0551589	0.0577004	-0.0408063	0.0916912	-0.124223	-0.00398292	-0.0425786	0.0520345	-0.065995	0.00957106	-0.0524646	0.0621517	-0.115241	-0.113908	0.138623	0.132954	-0.0126275	-0.0255287	0.0554002	0.0211676	0.0802743	0.125458
TaxonAdjustedID.MGS.down.10000000.v6.1034	CAG01020	MGS	Bacteria;Firmicutes;Clostridia;Clostridiales;Ruminococcaceae;unclassified Ruminococcaceae;Ruminococcaceae bacterium D5	0.160359	-0.213081	0.0634944	0.0155922	-0.0786852	0.0659591	0.0578725	-0.0278053	0.107545	-0.0328534	-0.172703	-0.0711332	0.0764971	0.0470021	0.0205218	-0.039804	0.040992	-0.037085	0.145123	0.0240563	0.100273	-0.0670719	-0.0772602	0.0662865	-0.0796371	0.046701	-0.0798365	0.0448046	0.0792484	-0.0601717	-0.00400035	-0.0604636	0.0870956	-0.0341893	0.0334219	0.013212	0.0336671	-0.133937	-0.0348531	0.00693254	0.00818805	0.0277553	0.0823298	-0.00148446	0.0271588	0.222089
TaxonAdjustedID.MGS.down.10000000.v6.1038	CAG01024	MGS	Bacteria;Firmicutes;unclassified Firmicutes;unclassified Firmicutes;unclassified Firmicutes;unclassified Firmicutes;unclassified Firmicutes	0.169523	-0.0321094	-0.0477746	0.129708	-0.0854854	0.0621629	-0.0309933	-0.0202402	-0.0156525	0.0481453	0.0461715	0.0137127	0.0485235	-0.124497	0.0777699	0.0649182	-0.0318651	-0.0107023	0.127124	-0.0299405	0.0461282	-0.0289067	-0.0702396	-0.0745921	-0.0923903	-0.0611324	-0.122511	0.00599438	0.00378023	-0.158997	-0.0700305	0.111241	-0.0339207	0.0399304	-0.0627087	0.062891	0.0157433	-0.103183	0.057224	0.0127103	-0.106332	0.051702	-0.0334572	-0.0735397	0.083054	0.093503
TaxonAdjustedID.MGS.down.10000000.v6.1039	CAG01025	MGS	Bacteria;Firmicutes;Clostridia;Clostridiales;Lachnospiraceae;Lachnoclostridium;Clostridium citroniae	-0.113183	-0.0550845	-0.0355247	-0.146256	0.184717	-0.157546	-0.0990501	-0.0933629	-0.087686	-0.0381531	-0.0753024	-0.0796448	-0.0711706	-0.00258687	-0.0299766	-0.136813	-0.0590935	-0.118327	-0.114314	0.0324932	-0.0774219	0.120549	-0.0655284	-0.0278346	-0.0261104	-0.114054	-0.0709492	0.0470062	-0.11239	-0.00876246	0.0277723	0.00628943	-0.148922	-0.0262763	-0.103189	-0.122834	-0.0117577	0.11825	-0.0342848	-0.113796	0.0849663	0.0693747	-0.149535	-0.0243772	-0.148985	-0.143775
TaxonAdjustedID.MGS.down.10000000.v6.104	CAG00580	MGS	Bacteria;Firmicutes;Clostridia;Clostridiales;unclassified Clostridiales;unclassified Clostridiales;Clostridium sp. CAG:62	0.000192969	-0.113885	0.115163	-0.131027	0.0202524	-0.0270549	0.0226322	0.00756132	-0.00922847	-0.0293914	-0.0368979	-0.125216	-0.064634	-0.0142883	0.0658244	-0.211489	0.0221417	-0.0257169	0.0186501	0.0691848	0.0486769	0.0910341	0.0458483	-0.0683055	-0.0371762	0.0732247	-0.027446	-0.0520315	0.0648855	-0.191317	0.0617759	-0.0895813	0.0917286	-0.0161414	0.0650226	-0.140132	0.112342	0.0654479	-0.0699883	-0.09745	-0.0226086	0.0473549	0.0789423	0.0767732	-0.0337556	-0.0772168
TaxonAdjustedID.MGS.down.10000000.v6.1041	CAG01030	MGS	Bacteria;Firmicutes;Erysipelotrichia;Erysipelotrichales;Erysipelotrichaceae;Coprobacillus;bacterium LF-3 / Coprobacillus sp. CAG:235	-0.060268	-0.011813	0.0286671	-0.0882194	0.0619225	0.0611831	-0.012354	0.0475539	-0.0245064	-0.069316	-0.0621847	0.00212651	-0.0790917	0.0259788	0.133081	0.032488	-0.036464	-0.0662172	0.114117	0.0303071	0.0926449	0.0353953	0.100198	-0.0486366	0.0473841	0.0644557	-0.0132961	0.0256253	0.07148	-0.0124978	0.0696392	-0.0414565	0.0189765	0.0512349	0.0514132	-0.0514748	0.0860514	0.0166061	-0.037592	-0.13127	-0.0503418	-0.0416074	0.0164118	0.0646618	-0.0451772	0.0121349
TaxonAdjustedID.MGS.down.10000000.v6.1046	CAG01035	MGS	Bacteria;Firmicutes;Clostridia;Clostridiales;Lachnospiraceae;Coprococcus;unclassified Coprococcus	0.0946218	0.0143065	0.0611061	0.0315351	-0.0926348	0.158175	0.208434	0.239911	0.092138	-0.038319	0.0654726	0.0638182	0.0286665	0.0214861	0.111842	0.0257611	-0.0133767	-0.00554468	-0.0119329	0.00741819	0.206543	-0.0536235	-0.0770765	0.194983	-0.131948	0.118889	0.0919211	0.0676711	0.00859504	0.0273335	0.00724086	0.0269358	-0.0955915	-0.105673	0.159196	0.00533601	0.0347554	0.0144021	0.0358101	-0.0491043	-0.0226327	0.107181	0.161054	-0.0673568	0.170422	0.0951907
TaxonAdjustedID.MGS.down.10000000.v6.1047	CAG01036	MGS	Bacteria;Firmicutes;Clostridia;Clostridiales;Eubacteriaceae;Eubacterium;Eubacterium sp. CAG:274	0.134296	0.0788195	0.0019787	-0.0479052	0.047051	-0.057746	0.0428677	0.088415	0.0445491	0.028043	-0.0532301	-0.00462663	-0.0622186	-0.058339	0.0136557	-0.0615229	-0.0336345	-0.0629667	0.0192646	-0.0562508	0.0331376	0.0444536	0.117772	0.0367704	-0.0034017	0.0140906	0.0133074	-0.219593	-0.0976293	-0.0337183	-0.0126408	-0.108299	-0.0822967	-0.0810955	0.0711264	-0.155775	-0.105506	-0.117723	0.020265	-0.0848361	-0.0267623	-0.0574401	0.0820595	-0.0450477	0.0210276	-0.0226959
TaxonAdjustedID.MGS.down.10000000.v6.1050	CAG01039	MGS	Bacteria;Firmicutes;Clostridia;Clostridiales;Ruminococcaceae;Faecalibacterium;unclassified Faecalibacterium	0.128173	0.0900419	0.08159	0.115632	-0.198903	0.0476458	0.0649453	0.0852662	0.0347612	-0.0907981	0.000797408	0.00704977	0.0267287	-0.0486905	0.119581	0.0495335	-0.0616262	0.0825317	0.0815127	-0.0632574	0.0776128	0.0378231	-0.0252347	-0.0339183	-0.0174943	0.131728	0.0081733	-0.00311256	0.0379526	-0.143844	-0.0689802	-0.00660729	0.0333277	-0.00877147	0.0507958	0.0872587	-0.0077914	-0.0760911	0.0960235	-0.0744885	-0.0700766	-0.0926923	0.177345	0.0721433	0.135324	-0.043232
TaxonAdjustedID.MGS.down.10000000.v6.1051	CAG01040	MGS	Bacteria;Firmicutes;Clostridia;Clostridiales;Lachnospiraceae;Lachnoclostridium;Clostridium asparagiforme == lavalense	-0.0131673	-0.0733922	-0.0572785	-0.0819067	0.140382	-0.133305	-0.129573	-0.156123	-0.135796	0.0207502	-0.087994	-0.111648	-0.0771845	-0.0731435	-0.0857057	-0.0452899	-0.112315	-0.0554406	-0.0349454	0.0284076	-0.144403	0.076459	-0.0513572	-0.00262652	-0.0773905	-0.116212	-0.136804	-0.00984725	-0.0898898	-0.114138	-0.00489388	0.033218	-0.0588197	0.0314013	-0.0823189	-0.088917	0.0337038	0.0500369	0.0313853	-0.0730496	0.0174835	0.113403	-0.128782	-0.0253232	-0.105943	-0.0711494
TaxonAdjustedID.MGS.down.10000000.v6.1054	CAG01043	MGS	Bacteria;Firmicutes;unclassified Firmicutes;unclassified Firmicutes;unclassified Firmicutes;unclassified Firmicutes;unclassified Firmicutes	0.146592	0.0187971	0.0308973	0.153008	-0.187051	0.153442	0.165874	0.0869416	0.0827298	-0.0372847	0.0632029	0.0997689	0.136456	0.115469	0.0480159	0.00792601	-0.0554848	0.123489	0.0757767	-0.0697044	0.102659	-0.0414038	0.0577334	0.047105	-0.0523744	0.139252	-0.00652423	0.0213787	0.0339952	-0.00108525	0.00334901	0.0934105	0.00796765	-0.0702134	0.029676	0.0695795	0.106534	-0.0339215	-0.0329016	0.103895	-0.0663483	0.0915013	0.156	-0.0583038	0.138122	0.145075
TaxonAdjustedID.MGS.down.10000000.v6.1057	CAG01046	MGS	Bacteria;Firmicutes;Clostridia;Clostridiales;unclassified Clostridiales;Intestinimonas;Intestinimonas massiliensis	0.225059	-0.180397	0.0772948	-0.00964857	-0.0664998	-0.0397888	-0.0111638	-0.0141881	0.0423642	-0.0113619	-0.0101064	-0.0447785	-0.0694128	-0.0807109	-0.0472452	-0.0894233	-0.0403109	0.01586	0.0731358	0.0626031	0.0310361	0.0106112	-0.148845	-0.0487613	-0.119522	0.0446467	-0.101127	0.025611	0.099396	-0.135581	-0.0341076	-0.0248496	5.83e-05	-0.0757387	-0.0400719	-0.0650837	0.032222	-0.075465	0.0302514	-0.0149899	-0.0834946	0.131474	0.0133246	-0.0385038	0.00586357	0.0602937
TaxonAdjustedID.MGS.down.10000000.v6.1062	CAG01052	MGS	Bacteria;Firmicutes;unclassified Firmicutes;unclassified Firmicutes;unclassified Firmicutes;unclassified Firmicutes;Firmicutes bacterium CAG:103	-0.030532	0.181512	0.0897408	0.128904	-0.220534	0.0405084	0.0468569	0.0892065	0.0321652	-0.0201048	0.0599747	0.0378643	0.108897	0.123237	-0.101731	0.0734667	-0.0420356	-0.0179997	-0.0103505	-0.112377	-0.0325518	0.114101	-0.029137	-0.0148119	-0.0792583	-0.0296107	0.0834688	-0.0616377	0.0536163	0.0368877	-0.0841732	0.0268669	-0.0672487	-0.0936047	0.100196	0.0252722	0.0933026	0.0253023	0.0611556	0.0816556	-0.0816114	-0.00478755	0.0936873	0.0182602	0.0392969	-0.124702
TaxonAdjustedID.MGS.down.10000000.v6.1066	CAG01637	MGS	Bacteria;Firmicutes;Clostridia;Clostridiales;unclassified Clostridiales;unclassified Clostridiales;Firmicutes bacterium CAG:65 / Clostridium sp. 2789STDY5608883	0.050925	-9.45e-05	0.0632355	-0.00944761	-0.0528142	0.0434944	0.0697957	-0.00141637	-0.0581265	-0.0681381	0.0577354	0.0519282	-0.00114492	0.0245963	0.0416779	-0.145646	0.0565922	0.0459971	0.0433755	-0.0307277	0.038322	0.145761	-0.0752843	-0.069643	-0.0914985	0.0114741	-0.0447633	-0.0466152	0.00663744	-0.200314	-0.0724842	0.0203366	0.0122125	0.00638426	0.00876052	0.0285996	-0.0684162	0.0469958	0.0385033	-0.149777	-0.00062848	0.0958216	0.00029904	-0.0122659	0.0899146	-0.0798509
TaxonAdjustedID.MGS.down.10000000.v6.1067	CAG01056	MGS	Bacteria;Proteobacteria;Gammaproteobacteria;Pasteurellales;Pasteurellaceae;Haemophilus;Haemophilus parainfluenzae	-0.00314528	0.0798627	0.134967	-0.0155773	-0.117417	0.0279592	0.0517914	0.148693	0.040666	-0.0166569	-0.0765902	0.0322346	0.143091	0.0466314	-0.00844701	-0.0934624	0.0378772	-0.0273142	-0.00481408	-0.0368812	0.120435	0.0999045	-0.0392081	-0.0363506	-0.0692058	0.0887159	-0.0603096	-0.0392506	0.0757215	0.057855	-0.0431518	-0.0528362	0.0795198	0.032613	0.135951	0.0143881	-0.0930818	0.0588557	0.0475828	-0.0749865	-0.115347	-0.0482506	0.0510611	0.037404	-0.0356156	-0.03649
TaxonAdjustedID.MGS.down.10000000.v6.1072	CAG01061	MGS	Bacteria;Firmicutes;Clostridia;Clostridiales;unclassified Clostridiales;unclassified Clostridiales;Clostridium sp. CAG:245	-0.0246142	-0.0452854	-0.00479949	0.0898893	-0.0872128	0.081897	0.115199	0.0374869	0.136674	-0.024318	0.0332701	-0.00831159	0.145441	-0.0696749	0.0469274	0.0712222	-0.117294	0.114716	0.0850252	-0.0562022	-0.00620711	0.0827229	0.0395787	0.0696341	-0.0552928	0.0898501	0.036248	0.0816204	-0.0363532	-0.0718144	0.00453654	0.0159529	-0.0163915	-0.161836	0.0762544	-0.0102372	0.0110461	-0.0573464	0.1188	0.0833366	0.040235	0.0232617	0.119355	-0.0613747	0.127135	0.018932
TaxonAdjustedID.MGS.down.10000000.v6.1073	CAG01062	MGS	Bacteria;Firmicutes;Clostridia;Clostridiales;unclassified Clostridiales;unclassified Clostridiales;unclassified Clostridiales	0.0983875	-0.0621462	-0.0107458	0.0994307	-0.0910984	0.0765426	0.029851	-0.0173446	0.0544908	-0.127536	-0.0787009	0.0224281	0.110955	-0.0132805	0.0647238	0.0368231	-0.0081479	0.110582	0.0114742	-0.0612171	0.0652467	0.0185281	0.0502972	-0.0100978	-0.035946	0.12404	0.00336233	0.0615816	0.0646122	0.00989381	-0.0557908	-0.0355171	0.0514578	-0.0367188	-0.0316531	0.014327	0.0691015	-0.119881	-0.0718429	0.0553078	0.0285911	-0.0144702	-0.00178326	-0.0370879	0.0414406	0.0236274
TaxonAdjustedID.MGS.down.10000000.v6.1074	CAG01063	MGS	Bacteria;Firmicutes;Clostridia;Clostridiales;unclassified Clostridiales;unclassified Clostridiales;Clostridium sp. 28_12 & CAG:356	0.101433	0.0838109	-0.0384293	0.0433027	-0.00632825	0.0902644	0.0679331	0.0771505	-0.00241628	0.0377586	0.0596507	0.0685161	0.0402471	0.0123435	0.166839	0.0334858	0.119689	0.0778883	-0.01808	0.0119855	0.0552484	-0.0107278	0.0279815	0.0976983	-0.0473322	0.123662	-0.00731193	-0.0177825	-0.0720412	-0.0160913	0.0162867	0.0339573	-0.002151	-0.0508512	0.0188799	0.0205783	-0.0227365	-0.0943551	-0.0196406	-0.0377144	-0.00887894	9.8e-05	0.0616041	0.0260794	0.028757	0.0475841
TaxonAdjustedID.MGS.down.10000000.v6.1076	CAG01065	MGS	Bacteria;Firmicutes;Clostridia;Clostridiales;unclassified Clostridiales;unclassified Clostridiales;unclassified Clostridiales	0.147795	0.0464966	0.248633	-0.051319	-0.19316	0.040214	0.179633	0.228121	0.0957229	-0.0778097	-0.108311	0.0387369	0.074983	0.151659	0.0969525	-0.0410597	0.0580696	0.0297666	-0.0696788	-0.072385	0.241445	0.0719979	-0.0232073	0.0254777	0.0584859	0.115737	0.0358402	-0.0594157	0.103032	-0.150833	0.00325151	-0.143035	-0.0479788	-0.131906	0.14056	-0.0598165	0.0347079	-0.0878968	0.00631427	-0.065284	-0.103158	0.02965	0.158443	-0.0457266	0.143937	0.147763
TaxonAdjustedID.MGS.down.10000000.v6.1084	CAG01072	MGS	Bacteria;Firmicutes;Clostridia;Clostridiales;unclassified Clostridiales;unclassified Clostridiales;unclassified Clostridiales	0.0151779	-0.0437705	0.013342	-0.000406936	-0.0127661	0.0447169	0.107856	-0.00500505	-0.000615769	-0.0569945	-0.0399377	-0.0543107	0.101166	0.0804669	-0.0222763	-0.0562417	0.0378429	-0.012654	0.0568964	0.0108174	0.0352954	0.0659899	-0.067815	0.154252	0.000779757	0.0787204	-0.057722	0.0167875	-0.0277163	-0.0775434	-0.0647574	0.0225387	0.0704932	-0.087315	0.117223	0.0442751	-0.071743	-0.124614	-0.00804109	-0.061145	0.0800036	0.0653441	0.106928	0.0147591	0.0969796	0.116597
TaxonAdjustedID.MGS.down.10000000.v6.1098	CAG01085	MGS	Bacteria;Firmicutes;unclassified Firmicutes;unclassified Firmicutes;unclassified Firmicutes;unclassified Firmicutes;unclassified Firmicutes	0.0694119	0.0357625	0.0712877	0.0320177	-0.103188	0.126041	0.08645	0.0390279	0.113992	-0.0543851	0.104949	0.0377061	0.152923	0.0710996	-0.0480621	0.00720224	0.0449263	-0.0195641	-0.0356954	-0.0547555	0.112429	-0.00805717	0.0355522	0.0312794	-0.00486458	0.109272	0.0463333	0.0553476	0.0499756	0.0172219	0.0344115	0.0740787	0.0982226	0.0480372	0.0630492	0.0588078	0.0811875	-0.0232693	0.0378358	0.0948921	0.00241945	-0.00449142	0.0581761	-0.0232676	0.0462161	0.181792
TaxonAdjustedID.MGS.down.10000000.v6.1099	CAG01086	MGS	Bacteria;Firmicutes;unclassified Firmicutes;unclassified Firmicutes;unclassified Firmicutes;unclassified Firmicutes;unclassified Firmicutes	0.195828	0.125991	-0.00352021	0.288147	-0.291291	0.108027	0.0577329	0.030264	0.118671	-0.033261	0.0756626	0.0329107	0.171319	0.0403954	-0.0305087	0.123011	-0.0471163	0.163059	0.107248	-0.0696583	0.0399546	-0.099003	-0.0187684	0.00253268	-0.0758661	0.0694097	0.094957	-0.0274946	0.0992812	0.0324733	-0.0300516	0.0908493	0.0120592	-0.0829656	-0.0190078	0.174264	0.0259498	0.0193524	0.0971669	0.123968	-0.103468	0.0578625	0.0711526	-0.0254517	0.250038	0.105405
TaxonAdjustedID.MGS.down.10000000.v6.11	CAG00015	MGS	Bacteria;Firmicutes;Clostridia;Clostridiales;Clostridiaceae;Hungatella;Hungatella hathewayi 2	0.0899743	-0.082556	-0.0421182	-0.0635192	0.106593	-0.111915	-0.153118	-0.139084	-0.155195	0.009912	-0.122106	-0.0648321	-0.145191	-0.112137	-0.0294523	-0.0411804	0.0132596	-0.0891234	-0.136192	0.0895263	-0.117558	0.0363284	-0.110021	-0.031948	-0.0871309	-0.108261	-0.0962415	0.0701723	-0.0289736	-0.0819115	0.0208122	0.119151	-0.0820794	-0.0466295	-0.135401	-0.104879	0.000501155	0.00736197	-0.0278537	-0.064025	0.0462861	0.0957761	-0.181049	-0.125671	-0.132476	-0.0822841
TaxonAdjustedID.MGS.down.10000000.v6.1103	CAG01090	MGS	Bacteria;Firmicutes;unclassified Firmicutes;unclassified Firmicutes;unclassified Firmicutes;unclassified Firmicutes;unclassified Firmicutes	0.239762	-0.0212042	0.0951009	0.114386	-0.210978	0.100977	0.129422	0.12374	0.101555	-0.0302522	0.0437009	0.0875093	0.132364	0.00100744	0.0735538	0.000137465	0.0334446	0.142055	-0.00159097	-0.0296877	0.10014	-0.0448588	0.0197763	-0.0103957	0.00408584	0.0500929	0.0704759	-0.00345163	0.096766	-0.00306058	0.0667255	-0.0843842	0.0152778	-0.0677383	0.0319876	0.0685013	-0.00170471	-0.0528285	0.105845	-0.0142642	-0.00357367	0.0574788	0.129999	-0.055908	0.129181	0.0222813
TaxonAdjustedID.MGS.down.10000000.v6.1104	CAG01091	MGS	Bacteria;Firmicutes;Clostridia;Clostridiales;unclassified Clostridiales;unclassified Clostridiales;Clostridium sp. 27_14	0.0337962	0.0105346	0.00728061	0.0947092	-0.104079	-0.0279973	-0.0340268	-0.0319091	-0.0536974	-0.034797	0.0724224	-0.00875356	0.0437251	-0.0219834	-0.0496075	-0.00613487	-0.119555	0.197615	-0.0177644	0.0295235	-0.111237	0.140347	0.00835626	-0.0307077	-0.058937	0.0838431	0.0328827	0.023701	0.0107731	-0.0738593	-0.0547077	0.0703339	0.0392983	-0.0108269	0.0224638	0.0393108	-0.0294676	0.0446865	0.0234095	0.0442482	-0.102145	-0.0291982	-0.0449773	-0.0129117	0.0366307	-0.0096661
TaxonAdjustedID.MGS.down.10000000.v6.1110	CAG01098	MGS	Bacteria;Firmicutes;Clostridia;Clostridiales;Lachnospiraceae;unclassified Lachnospiraceae;Coprococcus sp. 2789STDY5608819 / Clostridium sp. CAG:264	0.0188961	0.0681737	0.0746329	-0.0559141	-0.016541	-0.0111377	0.0486686	0.0951155	0.0795607	-0.0135299	0.0956504	-0.0122313	-0.0707883	-0.0784383	-0.0713452	-0.061774	-0.0516484	-0.111906	-0.0281468	0.107962	0.0122829	-0.0409346	0.0279241	0.0192376	0.0172626	-0.0747154	0.114007	-0.0975498	0.0885047	0.00700094	-0.0540315	0.0194092	-0.0547525	-0.102616	0.15637	-0.0540819	0.0512037	0.0180938	0.063705	-0.00146031	-0.0510123	-0.0477358	-9.43e-05	0.0154769	-0.0329012	0.0261032
TaxonAdjustedID.MGS.down.10000000.v6.1127	CAG01115	MGS	Bacteria;Actinobacteria;Coriobacteriia;Eggerthellales;Eggerthellaceae;Eggerthella;Eggerthella sp. CAG:298	0.000749137	-0.127271	-0.00755131	-0.041113	0.0495187	-0.000755296	0.0216243	0.00625104	0.0739931	-0.119145	0.00906287	-0.020079	0.031434	-0.0794306	-0.0900644	0.0270532	0.038828	0.00351239	-0.00095125	0.127852	-0.0361128	0.0566764	-0.0354861	0.0516988	-0.01631	-0.0490157	-0.0358152	0.0271717	0.123598	0.0646972	-0.0461656	-0.00295269	0.0543382	-0.0149059	0.0531732	-0.011039	0.0559493	-0.00795317	0.033976	-0.0221803	-0.0327176	-0.119601	-0.0477368	0.0414414	-0.0380852	0.129987
TaxonAdjustedID.MGS.down.10000000.v6.1144	CAG01132	MGS	Bacteria;Firmicutes;Clostridia;Clostridiales;unclassified Clostridiales;unclassified Clostridiales;Clostridium sp. 2789STDY5834924	-0.0536674	-0.0598446	-0.0175037	-0.0544424	0.0729877	-0.00550207	0.0789705	0.0420537	0.0220791	-0.0698485	-0.0592529	-0.0954339	0.0662506	-0.0527014	0.0369915	-0.0347714	-0.0891154	-0.0303664	0.0719591	0.0623243	0.0217868	0.130078	0.0449981	0.10177	-0.111398	0.0366303	-0.0781714	0.0903448	-0.120366	-0.123934	-0.0465625	-0.0669715	-0.0287834	-0.09301	0.0864482	-0.128151	0.029484	-0.0411651	0.084911	-0.0731311	0.0610154	-0.0608854	0.0320345	0.112274	0.0446188	-0.032021
TaxonAdjustedID.MGS.down.10000000.v6.1145	CAG01133	MGS	Bacteria;Actinobacteria;Coriobacteriia;Coriobacteriales;Coriobacteriaceae;Senegalimassilia;Senegalimassilia anaerobia	0.00774358	-0.0525117	-0.0108382	0.0538645	-0.0443937	-0.0317581	0.00302053	0.0740118	0.00591662	-0.11059	-0.0473542	0.0870051	-0.00107522	0.0207307	0.0257223	-0.104174	-0.046105	0.0406564	0.0454007	-0.0394094	0.0104614	0.101403	-0.119441	-0.119316	0.0206767	0.0632641	0.0279359	0.101545	0.00684721	-0.0810407	-0.0835034	0.0109061	0.0126837	-0.117569	0.075467	-0.0146196	0.0273626	0.0135484	-0.0379528	0.0970868	-0.0442604	0.0115174	0.0549503	-0.112276	0.0369897	-0.045072
TaxonAdjustedID.MGS.down.10000000.v6.1147	CAG01135	MGS	Bacteria;Firmicutes;Clostridia;Clostridiales;unclassified Clostridiales;unclassified Clostridiales;unclassified Clostridiales	0.161735	0.0900485	0.0191699	0.181115	-0.204218	0.151424	0.14237	0.0239289	0.0563071	-0.0590936	0.00168609	0.0891145	0.147744	0.00794627	0.132806	0.148654	0.0139577	0.10656	0.0918658	-0.0759884	0.0961604	-0.0414701	0.00293582	0.0953387	-0.0398825	0.105314	0.0280015	0.0409304	-0.0566475	0.00159685	-0.126528	-0.01198	-0.11125	-0.00824659	0.00995443	0.0358931	-0.0473057	-0.0355285	-0.050941	0.112218	-0.00806824	0.0365932	0.0388435	-0.088946	0.181918	0.0231288
TaxonAdjustedID.MGS.down.10000000.v6.1149	CAG01137	MGS	Bacteria;Firmicutes;Clostridia;Clostridiales;unclassified Clostridiales;unclassified Clostridiales;unclassified Clostridiales	0.201995	-0.0395513	-0.0763063	0.0196032	0.0553398	0.153145	0.13836	0.0504987	0.0334912	0.0530803	0.0919717	0.152794	0.0365361	-0.0116919	0.0743685	0.0554248	0.149948	-0.0175047	-0.0114632	-0.0458852	0.103084	0.0116275	-0.0175712	-0.00462215	0.0364485	0.0560347	-0.0651069	0.171	0.0284426	-0.0655871	-0.0435948	0.112854	-0.0765329	0.0220524	-0.0215188	-0.0323051	0.0728023	-0.0742617	0.0876091	0.0198068	0.0808617	0.0936368	-0.0245777	-0.0467245	0.116931	0.047634
TaxonAdjustedID.MGS.down.10000000.v6.115	CAG00116	MGS	Bacteria;Bacteroidetes;Bacteroidia;Bacteroidales;Bacteroidaceae;Bacteroides;Bacteroides nordii	-0.00501594	-0.0476393	0.242913	-0.13053	-0.106477	-0.0414718	0.0173201	0.0406626	0.0149947	-0.0537532	-0.0786261	-0.0301489	-0.0229808	0.146455	0.0262641	-0.109692	0.0234703	-0.0099127	-0.0917928	0.0206551	0.104511	0.0595775	-0.0321634	-0.0699546	-0.100538	0.102984	0.0357942	0.061399	0.149594	-0.096621	0.137433	-0.1819	0.0287367	-0.041307	0.0343396	-0.0499023	0.079241	-0.109546	-0.125343	-0.103476	-0.078512	-0.050926	0.0665651	0.117685	-0.00948041	0.167869
TaxonAdjustedID.MGS.down.10000000.v6.1158	CAG01146	MGS	Bacteria;Firmicutes;Clostridia;Clostridiales;Oscillospiraceae;Oscillibacter;unclassified Oscillibacter	0.0501776	-0.0250212	0.070391	0.057442	-0.128311	0.0402791	0.0332144	0.051076	0.0939751	-0.0208798	0.0555921	0.0501724	0.0340384	-0.03621	-0.0733461	0.0183369	-0.0528794	0.0923084	0.0723618	0.0585797	-0.0554539	-0.0498995	-0.017248	-0.0776513	-0.0886524	-0.0189417	0.054684	-0.0380646	0.0532629	0.0167482	-0.0613613	0.0909432	0.0524699	0.0081321	0.0578264	0.0596545	0.0203773	-0.014878	0.0588648	-0.00285856	-0.116242	0.0945755	0.0914707	-0.0141012	0.158993	-0.0466071
TaxonAdjustedID.MGS.down.10000000.v6.116	CAG00117	MGS	Bacteria;Bacteroidetes;Bacteroidia;Bacteroidales;Tannerellaceae;Parabacteroides;Parabacteroides merdae	0.0208559	0.0649959	0.0303927	0.0114156	-0.041707	0.0106567	-0.0659774	-0.039049	-0.0301009	0.00202959	0.015981	-0.028234	0.0612604	0.0490533	-0.0763108	-0.0365202	0.0092647	0.034689	-0.00285662	0.00789276	-0.0999638	0.0896522	0.0318473	-0.126758	-0.0945392	-0.058801	0.0120051	-0.216649	-0.0316103	0.03714	0.0805587	-0.00891303	0.0127574	0.0162373	0.0370997	-0.00903845	0.0529884	-0.0429762	0.0808109	-0.0250943	-0.0527608	-0.0119233	-0.00493429	0.00988328	0.0337035	-0.0946699
TaxonAdjustedID.MGS.down.10000000.v6.1164	CAG01152	MGS	Bacteria;Firmicutes;Clostridia;Clostridiales;unclassified Clostridiales;unclassified Clostridiales;Clostridium sp. CAG:508	0.0952948	-0.00477676	-0.0839957	0.186122	-0.107408	0.0477493	0.0473641	-0.00212079	-0.0109184	0.0504553	0.0513321	0.049618	0.0945372	-0.0360701	-0.0957245	0.105905	0.000351453	0.0970463	0.0200347	-0.153988	-0.0147407	-0.0110096	-0.0209577	0.0302172	0.00409875	0.134535	0.0395393	0.0389586	0.0293132	0.0093683	-0.127862	0.0936375	0.00131079	-0.00042242	0.0512894	0.0634646	0.0188097	-0.0472929	0.08868	0.071339	-0.0141948	-0.00344259	-0.0257251	-0.067309	0.0846103	0.0656122
TaxonAdjustedID.MGS.down.10000000.v6.1167	CAG01155	MGS	Bacteria;Firmicutes;Clostridia;Clostridiales;Lachnospiraceae;Blautia;Blautia sp. Marseille-P3087 / Ruminococcus sp. 2789STDY5608882	0.120842	0.00288417	0.139637	-0.0751346	-0.0611057	-0.0165804	0.00855053	0.0174095	-0.0194073	0.108755	-0.0953921	0.00982382	-0.0476397	-0.0149765	-0.0262069	-0.042278	0.0420508	-0.00693018	0.100146	-0.0631134	0.00117333	0.0585605	-0.1194	-0.058068	0.0286842	0.102999	-0.0312887	0.0219403	0.0412895	-0.179102	0.0445211	-0.109334	-0.0179732	0.0060017	0.0589925	-0.0593041	0.00533848	-0.0982396	0.0535511	0.0498843	-0.0703995	-0.0485117	0.00656442	0.0395359	0.027262	-0.0324647
TaxonAdjustedID.MGS.down.10000000.v6.1169	CAG01156	MGS	Bacteria;Firmicutes;Clostridia;Clostridiales;Lachnospiraceae;unclassified Lachnospiraceae;unclassified Lachnospiraceae	0.11289	0.0335363	-0.0595488	0.0511176	0.00654411	0.0959109	0.136257	0.120233	0.0366605	-0.0569081	0.0654445	0.0417719	0.0930557	-0.0991244	0.0866864	-0.0101792	-0.104382	-0.0519193	-0.0569616	-0.0840121	0.197931	0.0110268	0.0180308	0.0272171	0.0232513	0.0708075	0.116479	0.0173604	-0.0444462	-0.0350474	-0.0877889	0.00142611	-0.0528575	0.0800543	-0.0081781	0.0701033	-0.0650053	-0.0676605	0.0838119	-0.0809289	-0.00173683	-0.0522813	0.0472332	0.00145494	0.117312	0.0422943
TaxonAdjustedID.MGS.down.10000000.v6.117	CAG00118	MGS	Bacteria;Bacteroidetes;Bacteroidia;Bacteroidales;Bacteroidaceae;Bacteroides;Bacteroides vulgatus	-0.133581	-0.124593	-0.0344832	-0.115185	0.151902	-0.0343508	-0.116545	-0.0700901	-0.0790266	0.0249052	-0.0406241	-0.0655801	0.00449738	-0.0672751	0.0138499	-0.0453848	-0.0257034	-0.100939	-0.080019	0.0625558	-0.0744682	-0.0637656	0.0574236	-0.105036	-0.0510706	-0.14065	-0.0688028	-0.0409085	-0.00900986	0.0312257	0.0222536	0.0416275	-0.00829183	0.100046	-0.105833	-0.0514173	-0.0969301	0.109659	-0.0103195	-0.0902626	0.00324209	-0.0211287	-0.131895	0.0288907	-0.0942449	-0.079632
TaxonAdjustedID.MGS.down.10000000.v6.1172	CAG01158	MGS	Bacteria;Firmicutes;Clostridia;Clostridiales;unclassified Clostridiales;unclassified Clostridiales;unclassified Clostridiales	0.0113683	-0.0351781	0.0594255	-0.0837495	0.0269594	-0.0646646	-0.0719332	0.0533414	0.108872	-0.0333009	0.0152514	-0.0489987	-0.118337	-0.0561801	-0.0121484	-0.0507391	-0.00672522	-0.00418924	-0.0744087	-0.0872467	0.0387965	-0.0151657	0.00643123	-0.0849251	0.125767	-0.0484539	0.0717186	-0.00483538	0.0015534	-0.130003	0.0038275	-0.0587538	-0.00468904	0.0546606	0.0998236	-0.0211114	-0.029631	-0.0414424	0.00634933	-0.112946	-0.0933717	0.0859844	0.0298849	-0.020786	-0.0621233	0.0290636
TaxonAdjustedID.MGS.down.10000000.v6.1173	CAG01159	MGS	Bacteria;Firmicutes;Negativicutes;Veillonellales;Veillonellaceae;Veillonella;Veillonella rogosae	0.0181214	0.081334	0.214138	-0.0981606	-0.11116	-0.0871268	0.0135742	-0.00800557	0.00712446	-0.0542546	-0.125288	-0.0897101	-0.0196269	0.103217	-0.104259	-0.149125	0.0394122	-0.0238437	-0.0642214	-0.0347422	0.0143716	0.169149	-0.0945793	0.0064494	-0.103369	0.0796364	-0.0591633	-0.067488	0.0550211	-0.0734499	-0.0278031	-0.042004	-0.0264377	0.00661539	0.0750872	-0.054394	-0.0200415	0.00624499	0.04981	-0.106995	-0.085536	0.0577402	0.00179241	0.0386389	0.0635695	-0.0531683
TaxonAdjustedID.MGS.down.10000000.v6.1176	CAG01162	MGS	Bacteria;Firmicutes;Clostridia;Clostridiales;Lachnospiraceae;Roseburia;unclassified Roseburia	0.0328153	0.00316977	0.0725154	0.0202471	-0.0923603	-0.0534042	0.0656047	0.0840526	0.0847601	-0.0529591	0.0704143	-0.115905	0.0776339	-0.00203899	-0.033794	-0.0305585	-0.0980317	0.0363013	0.0251357	-0.0308315	0.0400041	0.0874739	0.0952052	0.0676313	-0.0547578	0.0896049	-0.0158815	0.0342113	-0.0428524	-0.102204	-0.137416	-0.0711243	-0.00648768	-0.145972	0.00518974	-0.0624363	-0.0145635	-0.0709143	0.0607171	-0.0223939	-0.15807	0.0369258	0.0106155	0.0328902	0.0256772	-0.0561216
TaxonAdjustedID.MGS.down.10000000.v6.1179	CAG01165	MGS	Bacteria;Bacteroidetes;Bacteroidia;Bacteroidales;Bacteroidaceae;Bacteroides;Bacteroides ovatus	-0.135547	-0.00358947	-0.0227253	-0.0958123	0.120467	-0.0442756	-0.109638	-0.0980872	-0.130181	0.0248839	-0.0257585	-0.0137765	-0.058339	-0.0614417	-0.0595291	-0.0379569	0.0121628	-0.106391	-0.0847914	0.0157607	-0.133471	0.0219992	-0.0997594	-0.0734828	-0.115289	-0.0857825	-0.112943	-0.123473	-0.0630753	0.055976	0.0908605	0.0237361	-0.00225139	-0.0201493	-0.0310419	-0.0599149	-0.00939886	0.142294	-0.0227863	-0.0828093	0.0737864	-0.0925837	-0.108327	0.011963	-0.113354	-0.105391
TaxonAdjustedID.MGS.down.10000000.v6.1183	CAG01169	MGS	Bacteria;Firmicutes;Clostridia;Clostridiales;unclassified Clostridiales;unclassified Clostridiales;unclassified Clostridiales	0.142304	0.096368	0.0516377	0.0934761	-0.146644	0.16588	0.104216	0.108639	0.148868	-0.0101664	0.0791217	0.0459167	0.161825	0.0311288	0.0403554	-0.0374546	-0.0392083	0.00992928	-0.0698674	-0.102513	0.150014	-0.0110738	0.040247	0.117425	0.0337524	0.0890293	0.0308762	0.0942174	0.0129627	-0.0390535	0.00651785	0.0303934	0.0329134	0.0593246	0.0560336	0.127653	-0.0628254	-0.0134439	-0.0239241	0.0286661	-0.0836796	0.0476387	0.149739	0.00580564	0.0382519	0.0851752
TaxonAdjustedID.MGS.down.10000000.v6.1198	CAG01183	MGS	Bacteria;Firmicutes;Clostridia;Clostridiales;unclassified Clostridiales;unclassified Clostridiales;unclassified Clostridiales	0.155184	0.0431248	0.0236794	0.175048	-0.202467	0.170529	0.102913	-0.0219704	-0.0618016	-0.0605043	0.0341395	0.0968051	0.134198	0.0804416	0.119072	0.0147201	0.0105266	0.037908	0.115259	-0.109204	0.0677909	0.0584635	-0.0847157	0.027694	-0.0488342	0.0851349	-0.0504495	0.00928137	0.0586605	-0.0304866	-0.0309462	0.0467598	0.0646436	-0.0050326	-0.0378068	0.120718	0.0979073	-0.0444949	0.0373525	0.059856	0.017789	-0.0469585	0.0505806	0.094517	0.124608	0.166312
TaxonAdjustedID.MGS.down.10000000.v6.120	CAG00121	MGS	Bacteria;Bacteroidetes;Bacteroidia;Bacteroidales;Bacteroidaceae;Bacteroides;Bacteroides finegoldii	0.00704626	0.0382707	0.0692236	-0.00713798	-0.0610934	-0.0488246	-0.0107109	-0.0186238	0.0920747	0.1141	0.0244696	-0.0610621	-0.0254584	0.0847275	-0.0036139	0.012866	-0.0138727	0.0579392	0.0168193	-0.00627673	0.0523101	0.0577083	-0.00348579	-0.0574797	-0.0451112	9.26e-05	0.144129	-0.0160332	0.0927666	0.0468635	-0.0381832	-0.00838325	0.0634415	0.0598919	0.0351051	-0.00611932	-0.0259606	0.0197001	-0.0778078	-0.0339976	-0.0760598	0.0332939	0.0239244	0.0814067	0.0954507	-0.0260176
TaxonAdjustedID.MGS.down.10000000.v6.1203	CAG01188	MGS	Bacteria;Firmicutes;unclassified Firmicutes;unclassified Firmicutes;unclassified Firmicutes;unclassified Firmicutes;Firmicutes bacterium CAG:321	0.0870548	0.0596935	0.023263	0.131122	-0.157119	0.058639	0.0703922	0.065657	0.155107	-0.0797241	0.0275589	0.0916388	0.0702499	0.0588494	0.0779851	0.00367274	-0.0572719	0.124765	0.0444542	-0.0942874	0.057844	0.0559288	-0.0313939	0.0157604	0.01799	-0.0517723	0.0619521	0.0453328	0.0823635	0.0343322	0.0583561	-0.00762342	0.0555139	-0.0219424	0.0279082	0.0703471	0.0388984	-0.0248967	0.0527055	0.0539004	-0.0237031	0.133662	0.108874	-0.0445317	0.00991625	-0.00303722
TaxonAdjustedID.MGS.down.10000000.v6.1205	CAG01190	MGS	Bacteria;Bacteroidetes;Bacteroidia;Bacteroidales;Odoribacteraceae;Butyricimonas;Butyricimonas virosa	0.0897495	0.00822317	0.0971463	0.0172995	-0.113681	0.0808346	0.0409411	-0.0239396	-0.0601168	0.0134387	-0.0686343	0.0429564	-0.0323351	-0.00177621	0.0757293	-0.0272625	-0.0493322	0.0784728	0.0709978	-0.111273	0.0858769	0.0909643	0.0524535	-0.076435	-0.0529005	0.223951	-0.0155348	-0.0277801	0.0532084	-0.106128	0.0547532	-0.0860818	0.0963319	0.069532	0.0584005	0.00598181	0.0797469	-0.0607434	-0.0709998	-0.0422319	0.0389407	-0.0902943	0.0347968	0.112811	0.0361198	-0.0247441
TaxonAdjustedID.MGS.down.10000000.v6.1212	CAG01197	MGS	Bacteria;Firmicutes;Negativicutes;Veillonellales;Veillonellaceae;Allisonella;Allisonella histaminiformans	-0.0446179	0.0372348	-0.0584906	0.0230623	0.0341986	0.0339355	-0.00644343	-0.0464153	-0.0507134	0.17374	0.0559387	-0.0273271	0.159528	-0.012965	0.0121776	0.00437082	0.0392512	0.0278935	-0.0602994	-0.031553	-0.0175882	0.100931	-0.0753097	-0.0746405	0.0422559	0.0714346	0.0634624	0.00596897	0.0147748	0.0250584	-0.018968	0.0222021	-0.0140383	0.0524968	0.00627547	0.0655193	0.080333	0.0563187	0.0432533	0.0343808	-0.0170656	-0.0352387	-0.0349133	0.0410895	0.000669344	-0.00142573
TaxonAdjustedID.MGS.down.10000000.v6.1213	CAG01198	MGS	Bacteria;Firmicutes;Clostridia;Clostridiales;unclassified Clostridiales;unclassified Clostridiales;Clostridium sp. 26_22	-0.0247587	-0.0128354	0.120833	-0.0433037	-0.0750889	0.0583378	0.159218	0.11798	0.0350936	-0.0113243	0.0418686	-0.00825908	-0.0759461	0.0396765	-0.0691342	-0.0978593	0.0376848	0.0335288	0.0958588	-0.0433587	0.115409	-0.00205943	-0.0153554	0.114492	-0.0380167	-0.069333	0.0942348	0.0312012	-0.0527097	-0.0244481	0.0917479	-0.020977	0.0730809	-0.106866	0.105932	-0.0323741	0.0170114	-0.0854162	-0.0868898	-0.0918608	0.00872067	-0.00719267	0.103899	-0.076442	0.0203031	0.0298226
TaxonAdjustedID.MGS.down.10000000.v6.1215	CAG01200	MGS	Bacteria;Firmicutes;Clostridia;Clostridiales;unclassified Clostridiales;unclassified Clostridiales;unclassified Clostridiales	0.0936067	0.0993892	0.0350256	0.107443	-0.144518	0.104343	0.0811	0.0971085	0.106971	0.00653127	0.0596434	0.0735287	0.119971	0.0795776	0.0307396	0.0926084	0.0357751	0.123874	0.0294145	-0.0515258	0.0711981	-0.00250454	0.0377006	-0.0933305	-0.00554178	0.125421	0.136416	-0.0157739	0.0218161	0.0439353	-0.079407	-0.00649308	0.0224002	0.0359635	0.0136717	0.0612873	0.00292448	0.0319035	0.108781	0.111843	-0.0421454	0.00759079	0.140273	-0.0781423	0.12264	0.0512497
TaxonAdjustedID.MGS.down.10000000.v6.1217	CAG01202	MGS	Bacteria;Bacteroidetes;Bacteroidia;Bacteroidales;Bacteroidaceae;Bacteroides;Bacteroides cellulosilyticus	0.133124	-0.0242333	0.0259446	-0.0244823	-0.000589293	0.0423482	0.0284117	0.0502202	-0.111658	-0.0949813	-0.0719791	0.0663765	-0.0308597	0.0507127	-0.0698521	-0.132278	-0.0201474	0.00319707	-0.0402426	-0.0576236	0.0108557	0.0517635	-0.0888646	-0.00886024	-0.0136064	-0.0159057	-0.121673	-0.0380819	-0.0989067	-0.0968581	0.120621	0.0355585	-0.0552632	-0.0254229	0.0411263	-0.0420222	0.0356469	0.0157062	-0.0481382	-0.207406	-0.0647026	0.041823	0.0463901	-0.122411	-0.0461533	-0.0434529
TaxonAdjustedID.MGS.down.10000000.v6.1220	CAG01205	MGS	Bacteria;Firmicutes;Negativicutes;Acidaminococcales;Acidaminococcaceae;Phascolarctobacterium;Phascolarctobacterium succinatutens	0.0690465	0.101772	-0.0307622	0.00905914	0.0211269	0.0926249	0.0898581	0.108736	0.0235696	0.0553949	0.14228	0.0166901	0.0185206	0.0783688	0.13463	-0.0508274	0.0348184	0.0340094	-0.00758725	-0.00883007	0.130591	-0.0519552	0.0786099	0.0454781	0.0760115	0.0885043	0.093444	0.0366561	0.122809	0.0144244	0.0814816	0.0142672	-0.11645	0.0463812	-0.0133859	0.0323303	0.0670797	0.0510123	0.0486182	-0.0242958	-0.0236897	0.119105	0.0573356	-0.0578572	0.0391085	0.00173726
TaxonAdjustedID.MGS.down.10000000.v6.1222	CAG01207	MGS	Bacteria;Firmicutes;Clostridia;Clostridiales;Oscillospiraceae;Oscillibacter;unclassified Oscillibacter	-0.0415065	0.0904324	0.0541237	-0.0538041	0.0015642	-0.0370772	-0.0465296	0.0498431	-0.0678903	-0.0941061	0.0143851	-0.0306263	0.0234626	-0.0129227	0.00346338	-0.047502	-0.0545937	-0.0653024	0.0543769	0.0143655	0.000346789	0.148143	0.0478104	-0.0942553	0.0193898	-0.0261285	0.0180922	-0.0781982	-0.0552346	-0.0956455	-0.0508575	0.0279662	-0.0827598	0.00680201	0.083631	-0.0128818	-0.0168216	-0.0567176	-0.00667566	-0.165302	-0.0939425	-0.0715912	-0.0414692	0.0411535	-0.0124899	-0.122236
TaxonAdjustedID.MGS.down.10000000.v6.1223	CAG01208	MGS	Bacteria;Firmicutes;Clostridia;Clostridiales;Lachnospiraceae;Coprococcus;Coprococcus catus	0.00138886	0.071095	0.0660591	-0.0952264	0.0321458	0.0730284	-0.0724198	-0.0547523	-0.0955801	-0.0387024	-0.00429002	0.0599734	-0.0104483	0.0775469	0.182726	-0.0382034	0.0133658	-0.0742854	0.0271489	0.0457196	-0.036033	0.106993	0.115297	-0.142427	0.0442394	0.120986	0.000198389	-0.0216458	-0.00218925	-0.0304194	-0.0225633	-0.0328315	-0.0037727	0.00719498	0.0379249	0.0172941	0.0203408	0.0229275	-0.0683318	-0.0490479	0.0131114	-0.0525167	0.0047843	0.122554	-0.0250303	-0.118107
TaxonAdjustedID.MGS.down.10000000.v6.1229	CAG01214	MGS	Bacteria;Firmicutes;Clostridia;Clostridiales;Lachnospiraceae;unclassified Lachnospiraceae;unclassified Lachnospiraceae	-0.0206553	-0.0270163	0.014426	-0.0334971	0.0200134	-0.000995424	0.000459535	0.016322	-0.0211608	-0.0619818	-0.0185889	-0.0407927	0.0144693	-0.0556576	0.0312448	-0.0566161	-0.127189	-0.00515499	0.0200192	0.0297947	0.063799	0.0342567	-0.00109344	-0.0743662	-0.0417659	-0.0375144	-0.0711779	0.0352794	-0.030372	-0.0969523	-0.0394167	-0.0192006	-0.0539899	-0.0109045	-0.00288591	-0.0396443	-0.00910078	0.0112887	0.0771518	-0.0955764	-0.0491188	-0.063729	-0.00929746	0.0961525	0.0234967	-0.133565
TaxonAdjustedID.MGS.down.10000000.v6.1230	CAG01215	MGS	Bacteria;Firmicutes;Clostridia;Clostridiales;unclassified Clostridiales;unclassified Clostridiales;unclassified Clostridiales	0.0519497	-0.0704098	-0.0774908	0.0324924	0.0433247	-0.0498875	-0.0777305	-0.0852336	-0.000401925	-0.0356503	-0.0675736	0.0739127	-0.126234	-0.142569	0.000250151	0.0209561	-0.127775	0.0547522	0.0270633	-0.0633677	-0.121753	0.0895422	-0.128113	-0.0629239	-0.0465108	-0.0833936	-0.0494048	0.0182103	-0.0616506	-0.107419	0.0445155	0.112046	0.0546663	0.0232123	-0.139916	0.0570699	-0.0164334	-0.00645147	0.0533942	-0.0965448	-0.000960147	0.0034027	-0.0362236	-0.0637569	-0.00855832	-0.0809643
TaxonAdjustedID.MGS.down.10000000.v6.1237	CAG01220	MGS	Bacteria;Firmicutes;Negativicutes;Acidaminococcales;Acidaminococcaceae;Phascolarctobacterium;Phascolarctobacterium succinatutens	0.0601001	0.107541	-0.0261708	-0.00177382	0.0276723	0.0830322	0.0905138	0.129325	0.0341488	0.0640837	0.161608	0.0246009	0.00498719	0.0702228	0.10172	-0.0580743	0.0434671	0.0216324	-0.00153074	0.00819115	0.142585	-0.046847	0.0778578	0.0435453	0.0906168	0.0957785	0.099996	0.067326	0.109764	0.0231064	0.0517615	0.00660054	-0.130457	0.0250397	0.00432577	0.0134165	0.0548792	0.0479019	0.0639761	-0.0435765	-0.0145878	0.137934	0.0555721	-0.051123	0.0316254	-0.0329276
TaxonAdjustedID.MGS.down.10000000.v6.1239	CAG01222	MGS	Bacteria;Firmicutes;Clostridia;Clostridiales;Lachnospiraceae;Blautia;Blautia sp. Marseille-P3087 / Ruminococcus sp. 2789STDY5608882	0.064708	-0.0282517	0.0457603	-0.00410471	-0.0410138	0.0200059	-0.0344311	0.0301085	0.131704	0.1244	-0.0359092	-0.00417678	0.0254657	0.00246189	0.0511468	-0.025992	0.0022914	5.56e-05	0.130884	0.00857374	0.0661346	0.193156	-0.0404046	-0.0945526	0.0404869	0.106771	-0.0544186	-0.0197471	0.0320709	-0.0332366	0.0090582	0.00969029	0.00628986	0.0428097	0.1144	0.0338398	-0.0404032	-0.0069566	-0.000324528	-0.0118345	-0.0907432	-0.0281692	0.0764883	0.0912706	-0.0451766	-0.100203
TaxonAdjustedID.MGS.down.10000000.v6.124	CAG00267	MGS	Bacteria;Firmicutes;Clostridia;Clostridiales;unclassified Clostridiales;unclassified Clostridiales;Clostridium sp. CAG:58	-0.0125469	0.029247	0.116681	-0.0728841	-0.0407263	-0.142619	-0.148005	-0.170512	-0.0267422	0.0374067	-0.0813137	-0.111509	-0.122413	-0.02611	0.0106583	-0.137098	-0.0398425	0.069097	0.0675668	0.0152783	-0.133113	0.0980383	-0.0323651	-0.165995	0.0452536	-0.0161486	-0.038262	-0.0636224	0.0485234	-0.130194	0.0139867	-0.115926	0.072483	0.0597039	-0.0891883	0.0539487	-0.0591956	-0.0849045	0.0578368	-0.00886978	-0.119608	-0.025442	-0.111793	0.0881361	0.0714838	-0.110758
TaxonAdjustedID.MGS.down.10000000.v6.1240	CAG01223	MGS	Bacteria;Firmicutes;unclassified Firmicutes;unclassified Firmicutes;unclassified Firmicutes;unclassified Firmicutes;unclassified Firmicutes	0.0825418	0.122602	-0.0149398	0.159672	-0.14858	0.182626	0.102115	0.0306456	0.0509796	-0.0320408	0.0472342	0.0927547	0.168417	-0.0162152	0.0582932	0.0487334	0.0128845	0.0402402	0.178009	-0.0644248	0.0747057	-0.00622341	0.175766	0.0440139	-0.0431909	0.101809	0.0927316	-0.0643808	0.0558833	-0.0384753	-0.0749381	0.0501253	-0.0158324	-0.0656812	0.0226234	0.117275	0.00944293	-0.0276623	0.033278	0.114248	0.036528	-0.000429186	0.080177	-0.00215628	0.222039	0.0561535
TaxonAdjustedID.MGS.down.10000000.v6.1242	CAG01225	MGS	Bacteria;Firmicutes;unclassified Firmicutes;unclassified Firmicutes;unclassified Firmicutes;unclassified Firmicutes;unclassified Firmicutes	0.118209	0.02547	0.0940965	0.0670121	-0.161523	0.135652	0.142596	0.105713	0.113836	0.018804	0.0357371	0.057919	0.0639945	0.0734134	0.135279	-0.035639	-0.0339875	0.0282159	0.117313	-0.0228347	0.19359	0.00401719	-0.0270632	-0.0288509	0.0678248	0.0719895	0.0512436	0.0218116	0.124144	0.0322263	0.0393349	-0.0291772	0.103036	0.0723143	0.128274	0.10845	0.0339965	0.000486396	0.0362099	-0.0324716	-0.00989255	0.0127725	0.156145	0.0994043	0.127301	0.0361775
TaxonAdjustedID.MGS.down.10000000.v6.1245	CAG01228	MGS	Bacteria;Firmicutes;Clostridia;Clostridiales;Lachnospiraceae;Lachnoclostridium;unclassified Lachnoclostridium	-0.0703074	-0.0248784	0.0493743	-0.0194956	-0.02884	-0.0506448	0.00554728	0.0455608	-0.0567674	-0.178292	-0.0795058	-0.056107	0.0274789	0.0622331	-0.0542408	-0.191668	-0.0850886	0.0142539	-0.159117	0.103566	0.0678995	0.117434	-0.0134154	-0.111604	-0.0781173	0.00844678	0.00532568	-0.0309945	-0.0434657	-0.0876048	-0.0386742	-0.0572508	-0.0791956	-0.0792072	-0.00278154	0.0177032	-0.0295835	0.0078821	-0.0445966	-0.145329	-0.142442	-0.0591276	0.000847029	0.118975	0.0567439	-0.0565024
TaxonAdjustedID.MGS.down.10000000.v6.1247	CAG01230	MGS	Bacteria;Firmicutes;Clostridia;Clostridiales;unclassified Clostridiales;unclassified Clostridiales;Clostridiales bacterium 1_7_47FAA & VE202-28	0.0411208	-0.0756042	0.0490953	-0.0726094	0.0257699	-0.0846531	-0.0141788	-0.0080688	-0.14603	-0.00334015	-0.151044	-0.0797942	-0.0307479	-0.0154086	-0.0343214	-0.052596	-0.0830524	-0.0714494	0.0980359	-0.00292504	-0.0688375	0.0792329	0.022556	-0.0378149	-0.00974581	0.0556416	-0.131043	0.0106851	0.00399113	-0.167931	0.00706283	-0.157567	0.0128544	-0.0960504	0.0199392	-0.200411	0.0367383	-0.0598666	0.0455463	-0.0792814	-0.0639981	0.0578051	-0.0421948	0.0212912	-0.0789679	0.064772
TaxonAdjustedID.MGS.down.10000000.v6.1253	CAG01235	MGS	Bacteria;Firmicutes;Clostridia;Clostridiales;Lachnospiraceae;Blautia;unclassified Blautia	-0.0286674	0.147691	0.175849	-0.030075	-0.142979	0.117603	-0.0127659	0.0722694	0.0296169	0.0548003	0.0334094	0.220257	-0.00549035	0.137382	0.039527	0.0703166	0.0930164	-0.0286498	0.0446563	0.0519863	-0.00413504	0.053455	0.0370464	-0.136124	0.0546764	0.116608	0.0277663	-0.053622	0.132156	-0.0508998	0.0104826	-0.0304654	0.0839398	0.0441954	0.14293	0.0987885	0.0573437	0.0198716	0.0566203	0.0798339	-0.0309058	-0.0747769	0.0138113	0.125844	0.0174947	-0.00450526
TaxonAdjustedID.MGS.down.10000000.v6.1255	CAG01237	MGS	Bacteria;Firmicutes;Clostridia;Clostridiales;Oscillospiraceae;Oscillibacter;unclassified Oscillibacter	0.0366985	0.188207	-0.0157793	0.193666	-0.182526	0.187432	0.147019	0.109864	0.10471	-0.0734818	0.155667	0.0630665	0.171326	0.0723498	0.129736	0.137719	-0.0737826	0.0407949	0.0980395	-0.086903	0.0878981	-0.00272873	0.0592001	0.107876	-0.0757828	-0.0274147	0.135681	-0.0193718	-0.0639119	0.118138	-0.0742043	0.118693	0.00133009	-0.0398647	0.114303	0.132466	0.084839	0.03646	0.0927835	0.0460735	0.0112054	0.00659562	0.0955277	-0.0234603	0.17406	-0.0137212
TaxonAdjustedID.MGS.down.10000000.v6.1256	CAG01238	MGS	Bacteria;Firmicutes;Clostridia;Clostridiales;unclassified Clostridiales;unclassified Clostridiales;butyrate-producing bacterium SS3/4 - Clostridium sp. CAG:81	-0.149893	0.0282457	0.00335966	-0.135236	0.135024	-0.013073	-0.0423356	0.0189538	-0.0504131	-0.0875833	0.0405856	0.0294796	-0.0719412	0.0314525	0.0196814	-0.0346747	0.032549	-0.123962	-0.063538	0.0700762	0.0516075	0.0650876	0.00644164	-0.128036	-0.034136	-0.0734739	-0.0293386	-0.0161096	-0.0427036	-0.0426215	0.0403995	-0.049416	-0.0444021	0.0588004	0.0102656	-0.0326363	0.0181076	-0.0194576	-0.00243166	-0.191295	0.0124219	-0.0147274	-0.108297	0.0621767	-0.0972057	-0.173186
TaxonAdjustedID.MGS.down.10000000.v6.1257	CAG01239	MGS	Bacteria;Firmicutes;Clostridia;Clostridiales;Lachnospiraceae;Blautia;Blautia sp. 2789STDY5608796 & sp. 2789STDY5608848	0.0311129	0.0179677	0.0991018	0.0205563	-0.118945	0.195764	0.180162	0.171455	0.179273	0.00193055	0.0326973	0.0894043	0.150319	0.0750323	0.0816079	0.0412572	0.0337055	-0.0401972	0.0486641	-0.0431273	0.203496	0.0081258	-0.0478211	0.047336	-0.087177	0.067839	-0.00120268	0.0111113	-0.052153	-0.00454737	-0.117976	-0.00621737	0.0381029	-0.0751614	0.155121	-0.0170357	0.0261574	0.0173913	0.0136078	-0.0462818	0.0564149	-0.0298102	0.185493	0.173694	-0.0231025	0.112634
TaxonAdjustedID.MGS.down.10000000.v6.1259	CAG01241	MGS	Bacteria;Firmicutes;Clostridia;Clostridiales;unclassified Clostridiales;unclassified Clostridiales;Clostridium sp. CAG:433	-1.4e-05	0.0169799	0.141785	-0.0239104	-0.115629	0.0140754	0.131829	0.0767737	0.0565416	-0.0403727	0.00201048	-0.0362596	0.0675618	0.116561	0.0255476	-0.0583066	-0.01358	0.0195038	-0.00401045	0.0736369	0.142679	0.10636	-0.00757893	0.0892234	-0.0105674	0.051135	0.0987263	0.0915656	0.0733701	-0.0509766	-0.0293046	-0.0380079	-0.0363864	-0.114505	0.15154	-0.0790841	0.0444989	-0.0526204	0.0267607	0.0146229	0.00727401	0.106586	0.0310846	-0.0973656	0.0575671	0.0683735
TaxonAdjustedID.MGS.down.10000000.v6.1264	CAG01245	MGS	Bacteria;Firmicutes;Clostridia;Clostridiales;unclassified Clostridiales;unclassified Clostridiales;unclassified Clostridiales	0.163001	-0.0696937	-0.0626332	0.200417	-0.143138	0.121038	-0.0386856	-0.143802	-0.0164539	0.0784788	0.0352466	0.0486648	0.0363599	-0.0976611	-0.0035024	0.0445078	-0.015422	0.197094	0.161131	-0.0637221	-0.0987672	0.0561677	0.0290717	-0.0238042	-0.0562216	0.00883634	0.0794902	0.0958369	-0.0180786	0.0452548	0.0127045	0.171912	0.0726144	-0.015214	-0.153023	0.148748	0.0187595	0.00519984	0.0827775	0.119254	0.00933577	-0.0211947	0.0371147	-0.0319631	0.0922847	0.0155951
TaxonAdjustedID.MGS.down.10000000.v6.1272	CAG01253	MGS	Bacteria;Firmicutes;Clostridia;Clostridiales;Eubacteriaceae;Eubacterium;Eubacterium sp. CAG:274	0.112712	0.153904	-0.0518098	-0.0589093	0.111453	-0.0349171	-0.0121321	0.0031292	-0.0727192	-0.0335405	0.0292682	0.0351514	-0.158422	-0.0586229	-0.0124488	0.0272674	0.00694811	-0.122826	0.00210681	0.0394783	-0.0195531	-0.0277657	0.0305355	-0.0253433	-0.0364982	-0.102089	-0.0182795	-0.207592	-0.0738112	-0.0198998	0.0199642	-0.0288866	-0.0774058	-0.0385506	-0.00914699	-0.110028	-0.0822388	-0.120092	0.0631791	-0.0361573	0.0133631	-0.0786282	-0.0483283	-0.0570819	0.0537565	-0.0695603
TaxonAdjustedID.MGS.down.10000000.v6.1274	CAG01254	MGS	Bacteria;Firmicutes;unclassified Firmicutes;unclassified Firmicutes;unclassified Firmicutes;unclassified Firmicutes;unclassified Firmicutes	0.0379646	0.158853	0.0794657	0.0224232	-0.101453	0.0679703	0.0679093	0.115978	0.0463318	0.0952158	0.0850584	0.0875271	0.0705585	0.0871192	0.134374	0.0991007	0.0505816	-0.0604403	-0.00690969	0.00298211	0.0984004	-0.0408632	-0.0223427	-0.0218063	0.098013	0.00634766	0.00591729	0.126692	0.0726001	-0.0834828	0.0564307	0.0391991	0.0035185	0.0185421	0.0820789	0.0120024	0.09842	-0.0810531	0.0631138	0.0247456	-0.0257238	0.0906952	0.0702236	-0.021907	-0.00793921	0.0157387
TaxonAdjustedID.MGS.down.10000000.v6.128	CAG00010_1	MGS	Bacteria;Firmicutes;Clostridia;Clostridiales;unclassified Clostridiales;unclassified Clostridiales;unclassified Clostridiales	0.165854	0.0477357	0.112359	0.221851	-0.337964	0.128403	0.104516	0.00850078	0.0825244	-0.0779803	0.0149654	0.0303126	0.218057	0.0448775	0.0174572	0.0299279	-0.0522883	0.17244	0.0748107	-0.124533	0.0513724	0.0633015	-0.0529297	0.0752787	-0.0357414	0.0827238	0.0804915	0.0347642	0.0397481	-0.0354096	-0.119423	0.0678583	0.0483557	-0.0812893	0.0235865	0.159637	0.013259	-0.0143213	0.0416753	0.116354	-0.0265992	0.0154378	0.0537855	-0.0444343	0.182447	0.15523
TaxonAdjustedID.MGS.down.10000000.v6.1281	CAG01261	MGS	Bacteria;Firmicutes;Clostridia;Clostridiales;unclassified Clostridiales;unclassified Clostridiales;unclassified Clostridiales	0.148513	-0.0207242	0.0852342	-0.0197704	-0.0639898	0.03303	0.0780497	0.12231	0.071098	-0.0506659	-0.0206966	-0.0583465	-0.0114359	0.0204662	0.078586	-0.0166826	-0.0275576	0.0857908	0.117819	0.106603	0.140728	0.0490673	0.0830614	0.0894437	-0.0144932	0.0178614	0.0607098	-0.0444119	0.0920276	-0.0290593	-0.0138485	-0.0495902	-0.0170939	0.0103087	0.148561	-0.0685141	0.0365178	-0.0375358	-0.0672466	-0.0618022	-0.0150185	-0.0579297	0.0759016	-0.0589404	0.0467657	0.147337
TaxonAdjustedID.MGS.down.10000000.v6.1283	CAG01263	MGS	Bacteria;Firmicutes;Clostridia;Clostridiales;Lachnospiraceae;Lachnoclostridium;Clostridium bolteae	-0.0179935	-0.0915889	-0.0575398	-0.0908428	0.149782	-0.159814	-0.134835	-0.141209	-0.128014	0.0154589	-0.102013	-0.10927	-0.055074	-0.0800937	-0.0337842	-0.122374	-0.0436425	-0.0733078	-0.0612633	-0.0290691	-0.158004	0.0756345	-0.0231523	-0.00451513	0.000530417	-0.1314	-0.0886803	0.0889119	-0.0529865	-0.0470305	0.00942073	-0.0588906	-0.0905512	0.0627183	-0.13962	-0.12431	-0.0548443	0.0284283	-0.0358571	-0.01965	0.00594592	0.130682	-0.139534	-0.0544021	-0.140455	-0.0361304
TaxonAdjustedID.MGS.down.10000000.v6.1290	CAG01270	MGS	unclassified;unclassified;unclassified;unclassified;unclassified;unclassified;unclassified	0.149758	0.038367	0.0178918	0.0122404	-0.0301994	-0.0179164	-0.0487146	-0.162966	-0.106965	0.0113053	0.0526211	0.0121898	-0.0320311	-0.0597975	0.0322667	-0.0522795	-0.0401723	-0.0287784	-0.0303436	-0.0083738	-0.0544256	0.0484852	-0.101887	-0.0971085	-0.00184111	0.0182229	-0.0222436	-0.125681	-0.110741	-0.115394	-0.0368311	0.0740716	-0.0466487	0.0223048	-0.0437074	0.0396349	-0.0302691	-0.108387	-0.00735355	-0.0337238	0.0102255	0.0608766	-0.0285044	-0.0846578	0.0885802	-0.0574947
TaxonAdjustedID.MGS.down.10000000.v6.1292	CAG01272	MGS	Bacteria;Actinobacteria;Coriobacteriia;Eggerthellales;Eggerthellaceae;Adlercreutzia;Adlercreutzia equolifaciens	-0.0348443	-0.12641	0.0627217	-0.0689944	0.00860849	0.0218467	-0.0672246	-0.0891323	-0.00859326	0.043369	-0.0268919	0.0775999	-0.0800967	-0.0457044	0.0711688	0.0303646	0.0633293	0.0313642	0.0241283	0.00746686	-0.0609643	0.0611709	-0.0194232	-0.0771116	-0.0539693	0.00368893	-0.104751	-0.116179	0.121645	-0.0367951	0.029154	0.00339508	0.140113	0.0624003	-0.0607497	0.00857396	-0.0664418	0.00203982	-0.0570375	-0.0579631	-0.0177714	-0.0150343	-0.0345701	0.0278226	-0.024774	0.0588876
TaxonAdjustedID.MGS.down.10000000.v6.1297	CAG01277	MGS	Bacteria;Firmicutes;Clostridia;Clostridiales;unclassified Clostridiales;unclassified Clostridiales;unclassified Clostridiales	0.179229	-0.14617	0.0147257	0.0768794	-0.0931956	0.0790474	-0.050179	-0.0920314	0.0934253	0.0480686	0.00352602	0.0366114	0.0603868	-0.0329028	-0.0571252	-0.0184611	0.0494206	0.10131	0.106879	-0.00693658	-0.0122341	-0.00912743	-0.0304474	-0.0277205	-0.00475145	0.103249	0.0113294	0.0824561	0.0969669	0.0291038	-0.0672638	0.0466645	0.0935618	0.0251811	0.0108054	0.106462	-0.00879818	0.0124628	0.0259786	-0.0083732	-0.0295152	0.0327451	0.0108597	0.0535332	0.0800673	0.0904409
TaxonAdjustedID.MGS.down.10000000.v6.13	CAG00020	MGS	Bacteria;Firmicutes;Clostridia;Clostridiales;unclassified Clostridiales;unclassified Clostridiales;Clostridium sp. KLE 1755 & Clostridiales bacterium VE202-27	0.0993469	-0.0869459	-0.0166716	-0.0154602	0.0322876	-0.0497404	-0.0214426	-0.0825973	0.0184639	0.0304756	-0.173658	-0.0480314	-0.0999534	-0.0533614	-0.0105857	-0.0572461	0.054202	0.0406373	0.105505	-0.0069883	0.0237133	0.0779791	-0.0659746	0.0055154	-0.0173909	-0.0144989	-0.140206	0.0024069	0.0679229	-0.106232	0.0610776	-0.00376083	0.110435	0.0903452	-0.0472007	-0.0642781	-0.0631646	0.00780394	-0.0209085	-0.0629103	0.0142808	-0.0242816	-0.00567638	0.0382093	-0.0328625	0.0232751
TaxonAdjustedID.MGS.down.10000000.v6.1301	CAG01281	MGS	Bacteria;Firmicutes;Clostridia;Clostridiales;unclassified Clostridiales;unclassified Clostridiales;unclassified Clostridiales	0.0057645	-0.185556	0.0552342	-0.121152	0.0693626	-0.0151289	0.0534786	-0.0686097	0.0294053	-0.0170529	-0.0418631	-0.062794	-0.0675703	-0.0347634	0.0305274	-0.0536347	0.0279311	0.0182201	-0.0763918	-0.00797066	0.055724	-0.0616846	-0.0202708	0.0151977	-0.0312273	0.0491696	0.0151071	-0.0173796	0.0127587	-0.10511	0.112243	-0.0717101	0.107272	0.00415777	-0.0433389	-0.0191898	0.0859965	0.00404707	-0.0452001	-0.17494	0.0137994	0.0494311	-0.0352252	0.0914074	0.00492144	0.102575
TaxonAdjustedID.MGS.down.10000000.v6.1302	CAG01282	MGS	Bacteria;Bacteroidetes;Bacteroidia;Bacteroidales;Bacteroidaceae;Bacteroides;Bacteroides plebeius	0.0427345	0.000454657	0.0351925	0.136946	-0.174864	-0.0628571	0.0453892	0.0512223	0.0565517	-0.0641228	0.0464207	-0.101868	0.0709892	-0.0123487	-0.0610167	-0.0415486	-0.0948713	0.119438	-0.0179116	-0.144022	-0.0154854	0.058107	-0.0201331	0.0643454	0.0318259	0.0562072	0.0472726	0.00265839	0.0414766	-0.0273233	-0.0447444	0.0176711	0.0219642	-0.0854987	0.0547417	0.0551249	-0.0577866	0.0469921	0.0437451	-0.0310694	-0.0940809	-0.0613364	0.103052	0.0259184	0.0801419	-0.0703399
TaxonAdjustedID.MGS.down.10000000.v6.1304	CAG01284	MGS	Bacteria;Firmicutes;Clostridia;Clostridiales;Lachnospiraceae;Blautia;unclassified Blautia	0.0895257	-0.11048	0.12202	0.0153289	-0.136241	-0.0195053	0.199543	0.172484	0.0970155	-0.13484	-0.0228968	-0.0980899	0.0773176	0.028831	-0.0509471	-0.0253155	0.00191859	0.0688009	-0.0465445	0.0135989	0.143807	0.0581401	-0.0242793	0.124198	0.010004	0.102819	-0.0050189	0.0496925	0.0350726	-0.0727145	0.0751329	-0.111192	-0.0194903	-0.131326	0.124296	-0.0535182	-0.0102548	-0.122434	-0.0101914	-0.0802739	-0.0909302	0.00785815	0.225624	0.0336668	0.050849	0.0806788
TaxonAdjustedID.MGS.down.10000000.v6.1307	CAG01287	MGS	Bacteria;Firmicutes;Clostridia;Clostridiales;Ruminococcaceae;unclassified Ruminococcaceae;unclassified Ruminococcaceae	0.173989	0.0524842	-0.076845	0.178258	-0.106429	0.0390834	0.118548	0.0982131	0.0936044	-0.00695574	0.0520834	0.0320459	0.106021	-0.0332738	0.00336328	0.0656421	-0.0682414	0.10315	0.0592547	-0.126624	0.101151	-0.0686151	0.0574563	0.0547832	0.0218327	0.0914302	-0.0392529	-0.0158242	0.0782062	-0.0863671	-0.00689245	0.102896	-0.0720866	-0.0299266	-0.0611335	0.0613082	-0.0632413	-0.0848111	0.0621319	0.0559374	-0.118047	0.0386942	0.0816174	-0.00422029	0.197463	0.0414382
TaxonAdjustedID.MGS.down.10000000.v6.1308	CAG50003	MGS	Bacteria;Firmicutes;Clostridia;Clostridiales;unclassified Clostridiales;unclassified Clostridiales;Clostridium sp. 2789STDY5834874 & sp. 2789STDY5608885	-0.0896347	-0.0334356	0.111451	-0.0715718	-0.0369015	-0.0307919	0.0700161	0.0966336	-0.00983026	-0.0824136	-0.0160899	-0.0928808	0.0665232	-0.0191717	0.0542991	-0.170405	-0.0727144	0.0361224	-0.0475172	0.0785468	0.116443	0.0685163	0.0298738	-0.0331408	-0.0645564	0.0809645	0.0177516	-0.0568363	-0.04161	-0.0663196	-0.0305461	-0.0792225	-0.0837518	-0.0525463	0.0444659	-0.0743315	-0.0464706	-0.036776	-0.010661	-0.101596	-0.11911	0.0640771	0.10367	0.100773	0.0062759	-0.0533368
TaxonAdjustedID.MGS.down.10000000.v6.131	CAG00342	MGS	Bacteria;Actinobacteria;Actinobacteria;Bifidobacteriales;Bifidobacteriaceae;Bifidobacterium;Bifidobacterium pseudocatenulatum	-0.150481	-0.0699319	0.111749	-0.14668	0.0396383	-0.0348532	-0.00806114	0.0498202	-0.00514797	0.0629478	-0.0206948	-0.0637889	0.019807	0.0539017	-0.0415127	-0.0118834	0.109157	-0.00417429	-0.067509	0.0862375	-0.0496968	0.0437325	0.0927969	-0.0574157	-0.0616288	-0.0213178	-0.0414056	0.00653719	0.075526	0.0673752	0.0659999	-0.108197	0.00229419	-0.0464433	0.0667728	-0.105905	-0.0533528	-0.0167507	0.0264874	-0.143541	-0.00515585	-0.0182973	0.0399289	0.0599205	-0.134194	-0.0110459
TaxonAdjustedID.MGS.down.10000000.v6.132	CAG00129	MGS	Bacteria;Proteobacteria;Deltaproteobacteria;Desulfovibrionales;Desulfovibrionaceae;unclassified Desulfovibrionaceae;unclassified Desulfovibrionaceae	-0.0227152	-0.0346692	0.121248	-0.0378169	-0.0811112	-0.114908	-0.0273091	0.0356864	0.0277509	0.107467	0.00177919	-0.0636559	0.0563505	0.0582612	-0.0984356	-0.0898133	-0.0273388	0.0425544	0.0151579	-0.0499622	-0.0357949	0.00904796	0.0266369	-0.0350844	0.0106471	-0.0249091	0.0968545	0.100927	0.15417	-0.0420392	-0.0345869	-0.0879986	-0.0972848	-0.0321107	0.0919675	-0.0561307	0.0430724	0.0336416	-0.043303	0.0260287	-0.0722734	0.224048	0.00107691	-0.0143927	0.00488211	-0.094983
TaxonAdjustedID.MGS.down.10000000.v6.1320	CAG01299	MGS	Bacteria;Firmicutes;Clostridia;Clostridiales;unclassified Clostridiales;unclassified Clostridiales;unclassified Clostridiales	-0.0516552	-0.1247	-0.024227	-0.0218197	0.0462583	-0.0544654	-0.147257	-0.169477	-0.00273191	0.130981	-0.0138425	-0.00164665	-0.0841369	0.0366302	-0.0964212	0.00437259	0.0938666	0.00818593	0.128316	0.0654015	-0.140371	0.0153094	0.0310954	-0.0806054	0.0416778	-0.071957	-0.12492	-0.0073442	-0.0155491	0.102121	-0.0604305	0.0285078	0.153766	0.0299695	-0.0521372	0.0214477	-0.0290714	0.124581	-0.0410545	0.0449734	0.00842578	0.0264129	-0.0741892	0.0772455	-0.147214	0.0224848
TaxonAdjustedID.MGS.down.10000000.v6.1322	CAG01301	MGS	Bacteria;Firmicutes;Clostridia;Clostridiales;Lachnospiraceae;Blautia;Blautia sp. Marseille-P3087 / Ruminococcus sp. 2789STDY5608882	-0.0318434	-0.0358596	-0.0012866	0.0256178	-0.0249353	0.016677	0.0163492	0.0687113	0.15774	0.0470069	0.00796267	-0.0386079	0.0707773	0.0153394	0.056955	-0.0147096	-0.0406819	-0.0200781	0.0943119	0.0361902	0.085173	0.184958	0.0236138	-0.0138128	-0.00988356	0.0716982	0.022868	-0.0309613	0.00338818	0.0528924	-0.00682246	-0.02222	0.0377031	0.0227609	0.113924	0.0535304	-0.0845524	0.00940023	-0.0209929	-0.0599712	-0.0738938	-0.0644462	0.103014	0.069715	-0.017331	-0.0987921
TaxonAdjustedID.MGS.down.10000000.v6.1323	CAG01302	MGS	Bacteria;Firmicutes;Clostridia;Clostridiales;Lachnospiraceae;Lachnoclostridium;Lachnoclostridium sp. An138	-0.0296932	-0.111986	-0.0622027	-0.0182018	0.0800786	0.0378512	-0.0843499	-0.10145	-0.0480203	0.0636784	-0.0405695	0.00267746	0.00976424	-0.027144	-0.00589518	-0.00593119	0.0773337	0.0349953	0.135862	0.0248926	-0.108215	0.0214762	0.0863735	-0.0645783	-0.0935032	-0.0619848	-0.129453	0.0199796	0.0613885	-0.0276349	0.0123629	0.0370878	0.125758	0.0138354	-0.0266178	-0.0506608	0.0105967	0.0327475	-0.015583	0.0848172	0.0416212	-0.0406934	-0.109677	-0.0439079	-0.0139305	0.0472243
TaxonAdjustedID.MGS.down.10000000.v6.1329	CAG01308	MGS	Bacteria;Firmicutes;unclassified Firmicutes;unclassified Firmicutes;unclassified Firmicutes;unclassified Firmicutes;unclassified Firmicutes	0.0623794	-0.0051381	-0.0202041	0.0637328	-0.045235	0.0355523	0.0432663	0.0368478	0.0372761	0.0413033	0.0542475	0.0137469	0.0956147	-0.122665	0.0809789	-0.0297639	-0.0296771	0.0344052	0.00123323	-0.00899775	0.0807835	0.0762309	-0.0388749	-0.0452441	0.0145103	0.0349264	-0.00638491	-0.0508866	0.00686396	-0.085835	-0.0606278	0.0117708	0.0593245	-0.00583111	-0.0212457	0.0247496	0.000633013	-0.031721	0.0914402	-0.00750418	-0.025748	0.0823917	0.0888209	0.141158	0.0667377	0.0474107
TaxonAdjustedID.MGS.down.10000000.v6.1341	CAG01320	MGS	Bacteria;Firmicutes;Clostridia;Clostridiales;Lachnospiraceae;Lachnoclostridium;Clostridium bolteae	-0.0848682	-0.0966776	-0.01043	-0.144207	0.157826	-0.163285	-0.0888327	-0.0917159	-0.0959902	-0.0409837	-0.135103	-0.189439	-0.131005	-0.085175	-0.00303119	-0.0950849	-0.0354187	-0.101953	-0.0529117	0.0555972	-0.0917617	0.092077	-0.0459657	-0.0361587	-0.0675415	-0.0813945	-0.0279152	0.0652636	-0.0294567	-0.0660206	0.0142876	-0.05647	-0.0850354	-0.0319332	-0.100062	-0.158209	0.041982	-0.00841576	-0.0213233	-0.11627	0.0424561	0.0966769	-0.0898207	0.0278038	-0.131993	-0.104434
TaxonAdjustedID.MGS.down.10000000.v6.1342	CAG01321	MGS	Bacteria;Firmicutes;Clostridia;Clostridiales;Ruminococcaceae;Faecalibacterium;Faecalibacterium prausnitzii 2	0.0387685	0.0838457	0.196071	-0.0733431	-0.118697	0.0372725	-0.0559704	0.0528514	-0.00831462	-0.0624618	-0.0365365	0.0777619	-0.0128116	0.103769	0.020024	-0.0943174	-0.00413153	-0.0972054	-0.0182433	0.0313174	0.0525303	0.127759	0.0240781	-0.18283	-0.0331957	0.023097	-0.0775279	0.0206597	0.0774642	-0.0996847	0.0752829	0.02974	0.0441694	0.0788136	0.0661092	0.101058	-0.0138753	-0.104972	0.0713249	-0.127896	-0.0611463	-0.0317405	0.048585	0.11578	-0.113434	-0.10455
TaxonAdjustedID.MGS.down.10000000.v6.1344	CAG01323	MGS	Bacteria;Bacteroidetes;Bacteroidia;Bacteroidales;Tannerellaceae;Parabacteroides;Parabacteroides merdae	-0.0273942	0.0692692	0.0477732	0.0099973	-0.0574287	0.0132219	-0.0258874	-0.0103794	-0.0472179	0.0394798	0.0380041	-0.0549515	0.0877664	0.056376	-0.0708258	-0.0431365	0.029515	0.00746126	-0.000195964	0.00316294	-0.0965715	0.0980331	0.0631449	-0.110625	-0.120273	-0.0245927	-0.0180031	-0.218146	-0.0258272	0.020976	0.0674983	-0.016342	0.00769352	0.0147733	0.0396991	-0.0253172	0.0776621	-0.0212722	0.0808199	-0.0284221	-0.0481362	-0.0310582	0.0271098	0.0218302	0.034773	-0.0812125
TaxonAdjustedID.MGS.down.10000000.v6.1346	CAG01325	MGS	Bacteria;Firmicutes;Clostridia;Clostridiales;unclassified Clostridiales;unclassified Clostridiales;unclassified Clostridiales	-0.0558418	0.010932	0.105343	0.00351855	-0.107682	0.0281809	0.0834	0.091924	0.0899654	-0.00233883	-0.0464026	0.00100085	0.156619	0.0779498	0.109363	-0.0997283	-0.0637858	-0.0091799	0.00081656	-0.0294757	0.0901744	0.0176018	0.0692075	0.0185706	-0.0314717	0.0672639	-0.00234442	-0.0102164	0.0288658	-0.0877451	-0.0182013	-0.0885767	-0.0358781	-0.0522739	0.139471	-0.0300329	-0.0139881	-0.0469438	0.0404607	-0.0174398	-0.0939789	0.0195059	0.0938277	0.040005	0.120817	-0.00285452
TaxonAdjustedID.MGS.down.10000000.v6.1365	CAG02021	MGS	Bacteria;Firmicutes;Clostridia;Clostridiales;unclassified Clostridiales;unclassified Clostridiales;Clostridium sp. 2789STDY5608793	0.151258	0.135405	0.190807	0.134158	-0.325765	0.00385684	0.159997	0.164985	0.0762171	-0.110308	0.0093565	0.0275489	0.0241649	0.0554225	0.011343	-0.0171393	-0.103199	0.116803	0.0159498	-0.155077	0.144634	0.142158	-0.0574041	0.0458569	-0.0278999	0.0861225	-0.00611443	-0.048629	0.117322	-0.0671984	-0.0788002	-0.0592175	-0.0200638	-0.132831	0.173004	0.0386892	0.00593096	0.0456666	0.103787	-0.0794847	-0.134976	0.00521469	0.12175	-0.0566019	0.179929	-0.098011
TaxonAdjustedID.MGS.down.10000000.v6.1372	CAG01350	MGS	Bacteria;Firmicutes;unclassified Firmicutes;unclassified Firmicutes;unclassified Firmicutes;unclassified Firmicutes;unclassified Firmicutes	0.167907	-0.153316	-0.108553	0.0908448	0.0143222	0.103931	0.102835	0.0663455	0.156924	0.146089	-0.0309782	0.128536	0.0680451	-0.124241	-0.0183342	0.047347	-0.000706531	0.100253	0.0878462	0.0576037	0.130292	-0.0363004	-0.0197548	-0.0449994	-0.0200189	0.0978042	0.0222473	0.0933717	0.060496	0.00294456	0.0414498	0.0835303	0.0887142	0.0687723	-0.0819021	0.08918	-0.0165577	-0.0971758	0.0674431	0.0873081	-0.0296745	0.0261404	0.110382	0.0614496	0.120105	0.156062
TaxonAdjustedID.MGS.down.10000000.v6.1379	CAG01356	MGS	Bacteria;Bacteroidetes;Bacteroidia;Bacteroidales;Odoribacteraceae;Butyricimonas;Butyricimonas virosa	0.10346	0.0369509	0.0454535	0.0252853	-0.0707761	0.109148	0.102265	0.0267391	-0.0839026	0.025403	-0.054696	0.0997652	-0.0223503	-0.0195842	0.0401147	0.00478223	-0.0567386	0.0792583	0.0574684	-0.0994401	0.130348	0.05686	0.0274061	-0.0291792	-0.0687586	0.171345	-0.00316128	-0.0397698	0.0209952	-0.100469	0.0348507	-0.0811023	0.037656	0.0599717	0.015388	-0.0146406	0.0650413	-0.100007	-0.0785142	-0.0502314	0.0397344	-0.0758355	0.0350475	0.0666048	0.0518717	0.00653406
TaxonAdjustedID.MGS.down.10000000.v6.1381	CAG01358	MGS	Bacteria;Firmicutes;Clostridia;Clostridiales;Lachnospiraceae;Eisenbergiella;Eisenbergiella tayi	0.0489948	-0.128363	-0.00989584	-0.0448566	0.0556648	0.019237	0.00716207	-0.0164421	-0.0922607	0.0059434	-0.0529361	0.0559882	-0.00259044	-0.059009	0.0377348	-0.0190897	-0.0114354	-0.0629679	0.104217	-0.0713994	-0.0446471	0.0439398	0.0371536	-0.027831	-0.0523717	0.0115821	-0.18218	0.074962	-0.013307	-0.102902	-0.0145726	0.0393879	0.0348194	0.0358201	-0.163039	-0.0795732	-0.00483967	0.0199457	0.0680891	-0.0777407	0.0348823	0.0310131	-0.0288507	0.0509142	-0.101728	0.0552472
TaxonAdjustedID.MGS.down.10000000.v6.1382	CAG01359	MGS	Bacteria;Firmicutes;Clostridia;Clostridiales;unclassified Clostridiales;unclassified Clostridiales;Clostridium sp. CAG:221	0.180927	0.167842	0.135954	0.0657577	-0.201597	0.11046	0.0688785	0.124088	0.0396001	-0.0398708	0.0122742	0.10715	0.0903546	0.138817	-0.0198479	0.0385377	-0.0413067	0.0239998	-0.0221408	-0.164435	0.0538028	0.0554799	0.0323613	-0.03238	0.0914869	-0.0244001	-0.0280937	-0.168995	0.0180379	-0.0100416	0.00140318	0.0645687	0.0354289	0.0119931	0.105082	0.125573	0.0801996	-0.0146507	0.0482332	0.0297739	-0.139932	0.0207793	0.0956802	-0.106203	0.0818413	-0.0433344
TaxonAdjustedID.MGS.down.10000000.v6.1389	CAG01366	MGS	Bacteria;Firmicutes;Bacilli;Lactobacillales;Streptococcaceae;Streptococcus;Streptococcus parasanguinis	0.0572585	-0.03105	-0.0946157	0.0805384	0.0110947	0.0226325	-0.0203621	-0.0160947	0.010719	0.0955653	0.120197	0.0204028	0.117724	-0.0747789	0.00642889	0.00370032	0.0784867	0.0349701	0.0441932	-0.0604828	-0.0149647	0.0453468	0.0991964	-0.057751	0.0241015	0.0549247	-0.114224	-0.0321513	0.0757197	0.0327554	-0.101429	0.0370158	0.0250883	0.0194956	-0.00384821	0.0218761	-0.121675	0.0681931	0.102394	-0.00286334	0.0320064	-0.0660283	-0.0813214	-0.103153	0.0780272	-0.0942391
TaxonAdjustedID.MGS.down.10000000.v6.139	CAG00135	MGS	Bacteria;Bacteroidetes;Bacteroidia;Bacteroidales;Bacteroidaceae;Bacteroides;Bacteroides eggerthii	-0.0416855	-0.0639174	0.122068	0.00843741	-0.129239	-0.0611984	0.00189872	0.0528299	0.0692741	-0.00936573	-0.0758498	-0.117916	0.0894413	0.104052	-0.0744288	-0.078491	-0.0164855	0.0543993	0.122875	0.0611147	0.00651846	-0.00478503	-0.00453222	-0.068656	-0.0865003	-0.044934	0.14509	0.0527306	0.0574279	0.0507391	0.0824671	-0.0550909	0.021875	-0.189461	0.0644098	-0.0681865	0.0105947	-0.0100021	0.0115524	-0.0209395	-0.0816651	0.0542415	0.0327453	0.0134953	-0.0138839	-0.10727
TaxonAdjustedID.MGS.down.10000000.v6.1392	CAG01369	MGS	Bacteria;Firmicutes;Clostridia;Clostridiales;Lachnospiraceae;Roseburia;Roseburia intestinalis	0.042177	0.0188696	-0.0559977	0.068084	-0.0143207	-0.0225111	0.0210582	0.0582441	0.00335385	-0.0684345	0.0260555	0.067444	-0.00172583	-0.0564885	0.0153178	0.0342478	-0.136856	0.010893	-0.0600006	-0.16973	-0.0182457	-0.00207388	0.00163269	-0.0708043	-0.0211941	0.083378	-0.0149988	-0.146856	-0.0121615	0.0151942	0.00930064	0.0292298	0.0462214	0.0675853	-0.0455424	0.0293013	-0.0479955	0.0282524	0.0321902	-0.0278735	-0.125264	-0.0628163	-0.04252	-0.0746491	0.0419559	-0.0924679
TaxonAdjustedID.MGS.down.10000000.v6.1394	CAG01371	MGS	Bacteria;Proteobacteria;Gammaproteobacteria;Enterobacterales;Enterobacteriaceae;Escherichia;Escherichia coli	0.141974	-0.0983623	0.18055	-0.0692554	-0.107543	0.000897275	0.111161	0.132817	0.167487	-0.0149674	-0.0199287	-0.00454634	-0.0621979	0.0301869	0.0111503	-0.0999489	0.0914524	0.04586	0.03778	0.0154263	0.0754397	0.0125534	-0.0114944	-0.0300389	-0.0337907	0.0542764	0.0872038	0.0617214	0.0956425	-0.017664	-0.0142186	-0.108858	0.111029	-0.0584569	0.141862	-0.0234776	0.0223906	0.0161551	0.0322893	0.0110192	-0.126193	0.0949948	0.182456	0.090245	0.0699614	0.00347871
TaxonAdjustedID.MGS.down.10000000.v6.1395	CAG01372	MGS	Bacteria;Firmicutes;Clostridia;Clostridiales;Oscillospiraceae;Oscillibacter;unclassified Oscillibacter	0.143378	-0.0185404	0.0890742	0.0938725	-0.184038	0.107766	0.00348793	-0.104581	0.0293863	0.0489933	0.0516885	0.0704141	0.0393908	0.0152953	-0.104819	0.160486	0.0415255	0.0751479	0.16956	-0.074698	-0.0644714	-0.0150789	-0.0858023	-0.0880398	0.0273555	0.139444	0.0117596	-0.0308497	0.0828166	0.0751816	-0.03444	0.0749921	0.146145	0.0483468	0.0330598	0.153778	0.028115	-0.0393294	0.0686966	0.0600365	0.0451633	-0.000535681	-0.00259069	-0.0344402	0.156338	0.109752
TaxonAdjustedID.MGS.down.10000000.v6.1402	CAG01379	MGS	Bacteria;Firmicutes;Clostridia;Clostridiales;Clostridiaceae;Hungatella;Hungatella hathewayi 2	0.0825785	-0.0529363	-0.0384952	0.0113157	0.0264589	-0.102407	-0.0883319	-0.107856	-0.136427	0.0588918	-0.140251	-0.0696204	-0.0664368	-0.182855	-0.105424	-0.00948338	-0.0761981	-0.0811256	-0.0711679	0.0640887	-0.0583403	0.0155882	-0.147569	0.0719905	-0.108106	-0.122926	-0.0960436	0.0707143	-0.0107607	-0.0959582	-0.0504021	0.103676	-0.0767753	-0.122415	-0.130219	-0.0321411	-0.0595867	-0.0110911	-0.0628181	-0.0374558	0.0390876	-0.00574082	-0.191707	-0.065828	-0.132094	-0.136846
TaxonAdjustedID.MGS.down.10000000.v6.1403	CAG01380	MGS	Bacteria;Firmicutes;Clostridia;Clostridiales;unclassified Clostridiales;Flavonifractor;Flavonifractor sp. 2789STDY5834895 & sp. 2789STDY5834937 / Clostridium sp. 2789STDY5608878	-0.0450817	-0.0803107	-0.025825	-0.16361	0.192886	-0.122861	-0.13178	-0.125719	-0.127393	-0.0400158	-0.085708	-0.0465707	-0.133198	-0.0789601	-0.0113106	-0.102034	-0.0642217	-0.0392046	0.0172634	0.0702339	-0.106803	0.0998826	-0.045247	-0.101324	-0.112907	-0.143596	-0.0535703	0.00758846	-0.107326	-0.0485548	0.0243724	-0.00442649	-0.0533415	-0.00417642	-0.0927737	-0.106493	-0.0576389	0.0578166	-0.0738041	-0.118979	0.0185672	-0.0284731	-0.163884	0.0265491	-0.101238	-0.114239
TaxonAdjustedID.MGS.down.10000000.v6.1409	CAG01386	MGS	Bacteria;Firmicutes;Clostridia;Clostridiales;Lachnospiraceae;Blautia;Blautia massiliensis	-0.01774	-0.0335332	0.0247014	-0.0285337	0.00478355	0.0444078	-0.0408299	0.0242258	0.0982123	0.00879885	-0.0513276	0.00513252	-0.00353433	0.0281558	0.0650611	0.00136068	0.0251995	-0.0622714	0.156196	-0.0154911	0.0335271	0.164915	0.0960193	-0.184118	-0.0283966	-0.00933266	0.0618128	-0.00989225	-0.0131924	0.0619804	-0.0271995	-0.0022681	0.0838635	0.0614053	0.0446605	-0.0187949	-0.0368048	0.0151974	-0.0394332	-0.00708089	-0.0358446	-0.141608	0.0490235	0.089492	-0.00984488	-0.0869698
TaxonAdjustedID.MGS.down.10000000.v6.142	CAG00384	MGS	Bacteria;Bacteroidetes;Bacteroidia;Bacteroidales;Rikenellaceae;Alistipes;Alistipes shahii	0.0634307	-0.0364113	0.167086	-0.00783484	-0.157072	0.0553783	0.0154242	-0.000864727	-0.00110298	0.0133729	-0.0567228	0.0584245	-0.0525553	0.0221292	0.0806765	-0.0206199	-0.00713517	-0.0128464	0.0506883	-0.0981857	-0.0316494	0.0845063	-0.0868887	-0.0994981	-0.0429072	0.047751	-0.0245727	-0.0695881	0.0921338	-0.103667	0.0979875	-0.032632	-0.0216339	-0.0515184	0.0706319	-0.0204191	0.13864	-0.0475061	-0.071762	-0.0519628	-0.0222862	0.0225793	0.132323	-0.0127878	0.0390088	0.0399734
TaxonAdjustedID.MGS.down.10000000.v6.1422	CAG01399	MGS	Bacteria;Firmicutes;Clostridia;Clostridiales;Oscillospiraceae;Oscillibacter;unclassified Oscillibacter	0.0563007	0.0314709	0.0696315	-0.0125022	-0.056009	0.0382769	0.0182533	-0.0217739	0.0651399	-0.0646548	0.0817794	0.0452768	-0.117085	0.0844657	0.00619917	-0.041358	-0.0507297	0.0229396	0.108492	-0.0128249	0.00704515	0.0456372	-0.0681138	-0.0893809	0.0375583	0.157385	-0.00721617	-0.0952895	0.0597554	-0.0461977	0.00642509	0.0878735	0.041499	0.0175822	0.0581756	0.0756675	0.0724054	-0.0406928	0.0488727	-0.036787	-0.01232	-0.0805551	-0.00871182	-0.0248833	0.168781	0.0101744
TaxonAdjustedID.MGS.down.10000000.v6.1425	CAG01402	MGS	Bacteria;Firmicutes;Erysipelotrichia;Erysipelotrichales;Erysipelotrichaceae;Turicibacter;Turicibacter sanguinis 2	0.0251494	0.0534228	-0.119546	0.147403	-0.0326741	0.110601	0.00650707	-0.0252403	-0.0860045	0.078492	-0.0117344	0.127093	0.135858	-0.0180623	-0.0140976	-0.0184017	0.0741068	0.061919	0.0830373	-0.00492407	0.0353283	-0.05121	0.0365036	-0.0229786	-0.0419101	-0.00580505	0.0322609	-0.0090964	-0.112271	0.0830782	-0.0178809	0.041049	0.0648686	0.122077	-0.133845	0.112152	-0.132039	0.0215283	0.0509336	0.144946	-0.0229086	-0.0481067	0.00530377	-0.0103843	0.0886599	0.00562164
TaxonAdjustedID.MGS.down.10000000.v6.143	CAG00170	MGS	unclassified;unclassified;unclassified;unclassified;unclassified;unclassified;unclassified	0.0339018	0.0684546	0.110218	0.0602784	-0.170563	0.0712311	0.132753	0.00109248	0.0540221	-0.0138854	0.0106977	-0.0108199	0.101042	0.0463434	-0.041583	0.0288345	-0.04761	0.0292891	0.0562834	-0.0124908	0.0598194	0.0653978	0.00331303	0.112767	-0.118587	0.151673	0.0555824	0.0193234	0.00986818	-0.0376463	-0.0375602	-0.01623	0.0128749	-0.067656	0.0782215	0.0540222	0.0689562	-0.117139	0.094987	0.0639965	-0.0480277	0.0312784	0.0911683	0.0605356	0.0630518	0.0685327
TaxonAdjustedID.MGS.down.10000000.v6.1430	CAG01408	MGS	Bacteria;Bacteroidetes;Bacteroidia;Bacteroidales;Odoribacteraceae;Butyricimonas;Butyricimonas synergistica 2	0.0185586	0.111847	0.0496122	-0.0287505	-0.0196075	-0.0414649	-0.11488	-0.0937003	-0.0585191	0.0184536	-0.051345	-0.0121513	0.0139646	0.0525535	-0.00962232	-0.0423343	-0.069692	-0.0156146	-0.0217269	0.0219125	-0.0516188	0.0649658	-0.00960983	-0.0646223	-0.0385204	-0.0841896	0.0362354	-0.0406807	-0.166327	-0.0145422	0.0437479	-0.0197589	0.0182306	-0.0214497	-0.0677654	0.0648522	-0.141632	-0.019012	0.00126214	0.0633719	-0.0949276	-0.0556298	-0.12657	-0.0339005	0.00942391	0.00342455
TaxonAdjustedID.MGS.down.10000000.v6.1431	CAG01551	MGS	Bacteria;Firmicutes;Clostridia;Clostridiales;Oscillospiraceae;Oscillibacter;unclassified Oscillibacter	0.0467247	0.0438924	0.0345125	0.0178226	-0.0523317	-0.134043	-0.100468	-0.166155	-0.0555859	-0.128831	-0.00181007	-0.137295	-0.1037	-0.0281292	-0.106424	-0.107283	-0.0305767	0.0926893	-0.0563864	0.0267747	-0.184973	0.054151	-0.141652	-0.12373	-0.121954	-0.0437226	-0.0557457	-0.13906	-0.106002	-0.110233	-0.0501372	0.105037	0.0589091	-0.0567462	-0.0578617	-0.0097056	0.00972891	-0.0660021	0.113373	-0.0669394	-0.066073	0.0262495	-0.055408	-0.0545156	-0.0134143	-0.0471635
TaxonAdjustedID.MGS.down.10000000.v6.1442	CAG01417	MGS	Bacteria;Firmicutes;Clostridia;Clostridiales;Ruminococcaceae;Faecalibacterium;unclassified Faecalibacterium	0.0123209	-0.000156053	0.140815	0.0119293	-0.151334	-0.0302329	0.07593	0.0910399	0.131251	-0.120337	-0.0534628	-0.00594026	-0.00272203	0.058793	0.111529	-0.0772051	-0.0133881	0.0711347	0.0274507	-0.0666692	0.10011	0.0565982	-0.0322284	0.0860324	0.000381238	0.0498972	-0.0735033	0.00441041	0.0304431	-0.0466267	-0.00111103	-0.0967986	0.0230606	-0.0268973	0.178705	-0.0445182	-0.0676476	-0.0879213	0.000329189	-0.0985557	-0.00243914	-0.0395377	0.0875311	-0.00634432	-0.0365757	-0.047654
TaxonAdjustedID.MGS.down.10000000.v6.1443	CAG01418	MGS	Bacteria;Bacteroidetes;Bacteroidia;Bacteroidales;Odoribacteraceae;Butyricimonas;unclassified Butyricimonas	-0.0687723	-0.00226679	0.183829	-0.235138	0.0589124	0.000592317	-0.0124168	0.138506	0.0137468	-0.0604082	-0.103447	0.0473389	-0.0934079	0.114932	0.0656139	-0.189069	0.0986852	-0.127834	-0.0341873	0.203733	0.0942215	0.0827603	0.0358208	-0.0961123	0.0658173	0.0634218	0.0714018	0.0477105	0.136044	-0.0404509	-0.0260006	-0.15291	0.110346	0.0535333	0.131825	-0.0498859	-0.0305655	-0.0516221	0.0196839	-0.0696278	-0.0645043	0.0548987	0.055894	0.153858	-0.0197187	-0.0368694
TaxonAdjustedID.MGS.down.10000000.v6.1449	CAG01424	MGS	Bacteria;Firmicutes;unclassified Firmicutes;unclassified Firmicutes;unclassified Firmicutes;unclassified Firmicutes;Firmicutes bacterium CAG:240	0.158056	0.00429199	0.0224473	0.211484	-0.238522	0.184495	0.214598	0.127786	0.0872417	-0.119672	-0.0162937	0.109978	0.255409	0.111126	0.0288922	0.0973259	-0.054788	0.0768246	0.0847942	-0.0559199	0.122659	0.041055	0.0645493	0.118389	-0.0797371	0.105769	-0.0589424	0.081072	-0.012411	-0.0312145	-0.0768253	0.0198683	0.0510801	-0.0293622	-0.00796587	0.0668515	0.11909	-0.121534	0.0900708	0.0644364	-0.0468869	-0.0532307	0.16437	0.0396784	0.0842247	0.216378
TaxonAdjustedID.MGS.down.10000000.v6.145	CAG00140	MGS	Bacteria;Firmicutes;Clostridia;Clostridiales;Ruminococcaceae;Ruthenibacterium;Ruthenibacterium lactatiformans	0.11954	-0.144429	0.0568131	-0.00763443	-0.0483236	-0.0273971	-0.145011	-0.19617	-0.0172419	0.0523539	-0.129656	-0.0712006	-0.0386729	-0.0455101	-0.05299	-0.0480943	0.00884564	-0.0191057	0.0763545	-0.0125494	-0.128098	0.0861913	0.00105081	-0.0872805	-0.0871366	-0.0411025	0.000425147	0.0433434	0.0773477	-0.0361258	0.019353	0.0825356	0.111356	0.0349641	-0.12161	0.0701065	-0.0345269	0.0904845	-0.0582815	-0.0374983	-0.0208487	0.0331081	-0.0721032	0.0476216	0.00419711	0.00170612
TaxonAdjustedID.MGS.down.10000000.v6.1454	CAG01430	MGS	Bacteria;Firmicutes;Clostridia;Clostridiales;Eubacteriaceae;Eubacterium;unclassified Eubacterium	-0.00951527	-0.117592	0.110788	0.1037	-0.215545	0.0408073	0.0279557	0.0917547	0.0932139	-0.123026	-0.0337563	0.0156436	0.0850417	0.0367752	0.00544073	-0.0482314	-0.0433748	0.0478948	0.0604049	-0.0765087	0.06843	0.0242418	-0.00707785	0.00108462	0.000710814	0.106444	-0.029114	0.0731778	0.105059	0.0267595	0.0259199	0.0448385	0.1129	-0.0980401	0.0696586	0.11253	-0.032121	-0.0387425	0.0485562	-0.0241736	-0.104315	-0.062931	0.107072	0.101958	-0.0944739	0.103634
TaxonAdjustedID.MGS.down.10000000.v6.1459	CAG50004	MGS	Bacteria;Firmicutes;Clostridia;Clostridiales;unclassified Clostridiales;unclassified Clostridiales;unclassified Clostridiales	-0.0305839	-0.0441271	0.011593	-0.0618944	0.0518624	0.037845	0.0501351	0.0246127	0.0783491	0.0302216	-0.0324784	0.0380308	-0.12265	-0.0888039	0.114984	-0.0792439	0.0409329	0.031716	0.037305	-0.112407	0.112088	0.147447	0.00541275	0.0211748	0.017383	0.0691052	-0.0602392	0.0448998	-0.0534555	-0.0697367	0.00823147	-0.00529593	0.0617808	0.0941582	0.0615263	-0.0661984	-0.0513897	0.0131325	0.0428202	-0.078873	-0.00567973	-0.0204806	0.0527	0.0712123	-0.0475197	0.0303313
TaxonAdjustedID.MGS.down.10000000.v6.1460	CAG01435	MGS	Bacteria;Firmicutes;Clostridia;Clostridiales;Ruminococcaceae;Gemmiger;unclassified Gemmiger	0.174599	0.0582779	-0.0484887	0.160422	-0.1162	0.0270795	0.113616	0.109714	0.0924667	-0.00810745	0.0331287	0.0218939	0.0975263	-0.0286125	0.00860138	0.0831158	-0.0673252	0.0801638	0.0711435	-0.113166	0.106632	-0.0589032	0.0376398	0.0338293	0.0131676	0.0812007	-0.0193669	-0.0155741	0.0820721	-0.0895317	-0.0252134	0.0825091	-0.0887061	-0.0402745	-0.0388601	0.0468991	-0.0708646	-0.0834064	0.0393609	0.0311801	-0.127786	0.0445505	0.0859007	0.0107934	0.210998	0.0307308
TaxonAdjustedID.MGS.down.10000000.v6.1465	CAG01440	MGS	Bacteria;Firmicutes;unclassified Firmicutes;unclassified Firmicutes;unclassified Firmicutes;unclassified Firmicutes;unclassified Firmicutes	0.0826148	0.000533404	0.130782	0.16242	-0.29537	0.127048	0.177254	0.154386	0.0712124	-0.0639815	-0.024982	0.0523991	0.192102	0.112378	-0.00341705	-0.0575664	-0.052862	0.182316	0.0493432	-0.107651	0.147343	0.0446879	-0.0429928	0.0731731	-0.0738248	0.0395944	-0.00162922	0.0393691	0.0997657	-0.0305874	0.0597975	0.0237905	-0.0675514	-0.0787412	0.0593407	0.0861025	0.0573215	0.0161431	0.0163992	0.090308	-0.0400797	0.0313587	0.156524	0.00238401	0.0811765	0.115879
TaxonAdjustedID.MGS.down.10000000.v6.147	CAG00141	MGS	Bacteria;Bacteroidetes;Bacteroidia;Bacteroidales;Tannerellaceae;Parabacteroides;Parabacteroides distasonis	-0.0547159	-0.00288157	0.0126001	-0.0357456	0.0241176	-0.077993	-0.161835	-0.148006	-0.0562748	0.0154312	0.0167106	-0.126661	0.0352067	-0.0139501	-0.0367575	0.0137535	-0.0241526	-0.0504459	0.0486523	-0.00122726	-0.156465	0.108726	-0.0567555	-0.0878664	-0.170411	-0.0220279	-0.123328	-0.00534204	0.00587817	0.015406	0.00210112	0.0796694	0.138272	0.0194012	-0.0383371	0.0254734	-0.0886732	0.0390928	0.0603836	-0.0159252	-0.042816	-0.0618996	-0.0832707	-0.0104186	-0.0721447	0.0157905
TaxonAdjustedID.MGS.down.10000000.v6.1479	CAG01455	MGS	Bacteria;Firmicutes;Clostridia;Clostridiales;Ruminococcaceae;Phocea;Phocea massiliensis	0.0588515	0.118982	-0.0421955	0.0533017	-0.0128358	-0.053109	-0.0806384	-0.195025	-0.049464	-0.0466504	0.122433	-0.0540754	0.00297051	-0.0590802	0.000774713	0.0580374	-0.0136521	0.0522762	-0.0487069	-0.0394876	-0.120212	0.0253531	-0.0643152	-0.115209	-0.101484	-0.0769247	0.0367299	-0.0449927	-0.0137113	-0.0940375	-0.147347	0.0355749	0.0460014	0.155144	-0.157621	0.0911329	-0.0871589	-0.0408169	0.140277	-0.000267327	0.0570369	-0.0144775	-0.0955791	-0.00715049	0.105566	-0.0455476
TaxonAdjustedID.MGS.down.10000000.v6.148	CAG00142	MGS	Bacteria;Bacteroidetes;Bacteroidia;Bacteroidales;Bacteroidaceae;Bacteroides;Bacteroides stercoris	-0.0280673	0.0593148	0.0534632	0.0197623	-0.07304	-0.0323649	-0.0337036	-0.0385239	0.102906	-0.0326629	0.0134142	-0.0564987	0.096425	0.0574514	-0.069219	0.0445286	-0.0645714	-0.0178112	0.0236083	-0.0364755	-0.0278523	0.0764638	0.0398736	-0.0381939	-0.109209	9.79e-05	0.0326264	-0.026754	0.0945922	0.058293	0.0313976	0.00897132	0.0735593	-0.0247009	0.0866153	0.0105515	-0.00387315	-0.0706931	0.0987404	0.0508909	-0.0311706	0.0184018	0.0419035	0.0609198	0.0739937	0.0192222
TaxonAdjustedID.MGS.down.10000000.v6.1485	CAG01461	MGS	Bacteria;Proteobacteria;Gammaproteobacteria;Pasteurellales;Pasteurellaceae;Haemophilus;Haemophilus parainfluenzae	-0.00546625	0.075152	0.121332	-0.0150489	-0.104486	0.026128	0.0720825	0.134849	0.0428545	-0.0146056	-0.0626631	0.0236676	0.133179	0.0461235	0.0108653	-0.0717809	0.0415183	-0.0285163	-0.013375	-0.046292	0.120676	0.10614	-0.0212996	-0.024677	-0.0882125	0.0849946	-0.0507343	-0.0181832	0.040475	0.0667261	-0.0467143	-0.0384532	0.0929362	0.0262619	0.133583	0.0169768	-0.108061	0.0636123	0.046531	-0.0910747	-0.112033	-0.0506373	0.0397417	0.0311656	-0.0175949	-0.05063
TaxonAdjustedID.MGS.down.10000000.v6.1489	CAG01465	MGS	Bacteria;Bacteroidetes;Bacteroidia;Bacteroidales;Rikenellaceae;Alistipes;unclassified Alistipes	0.151422	-0.0416485	-0.0105195	0.103038	-0.0950118	-0.0220097	-0.0992018	-0.0621719	-0.0301686	-0.0183125	-0.0357074	-0.065801	-0.0568743	-0.0714374	0.0923583	0.025608	-0.0801441	0.0821693	0.11228	-0.169669	-0.0235833	-0.0551279	-0.000674291	-0.0215991	-0.00937284	0.0136053	-0.0585932	-0.00886255	-0.116272	-0.108816	-0.010292	-0.028328	0.00901701	0.0412612	-0.0332131	0.0254849	0.0174797	0.0102607	0.0579247	-0.0625657	-0.0869821	0.0101693	-0.0341712	0.0138161	-0.0366227	-0.0763373
TaxonAdjustedID.MGS.down.10000000.v6.1495	CAG01471	MGS	Bacteria;Firmicutes;Clostridia;Clostridiales;Clostridiaceae;Butyricicoccus;Butyricicoccus sp. 2789STDY5834927 / Clostridia bacterium UC5.1-1D1	-0.0763032	-0.089668	-0.0377609	-0.140982	0.181531	-0.130747	-0.192387	-0.20807	-0.11696	0.0538292	-0.0463054	-0.0547539	-0.165465	-0.107099	-0.126893	-0.0484224	0.0224922	-0.0842304	0.00725372	0.0715256	-0.221347	0.0887048	-0.0122904	-0.164664	-0.0434853	-0.139313	0.00846601	0.013048	-0.0321932	-0.0696196	-0.0475091	-0.0288099	0.0217648	0.0705213	-0.071916	-0.0744056	-0.0514985	-0.00824641	0.00991826	-0.017388	0.0153821	0.00546219	-0.190823	0.0363309	-0.11579	-0.102991
TaxonAdjustedID.MGS.down.10000000.v6.1502	CAG01477	MGS	Bacteria;Firmicutes;Negativicutes;Veillonellales;Veillonellaceae;Megasphaera;Megasphaera sp. ASD88 & An286	-0.0447959	-0.0942051	-0.000131913	-0.116068	0.118866	-0.0817221	-0.167942	-0.155556	-0.0732717	0.0809559	0.0224519	-0.0368387	-0.201094	-0.0571102	0.0290511	-0.00984699	0.0600798	-0.0321892	0.0413708	0.076806	-0.126253	-0.0757616	-0.031304	-0.0868792	0.022239	-0.0987734	0.0454503	0.0847067	0.00255708	0.00990214	0.0282717	0.0794798	-0.0253817	0.0951175	-0.0661492	-0.0139535	0.0478015	0.098945	-0.023941	0.0108016	0.059842	-0.00682163	-0.132404	-0.0832524	-0.0518454	0.0367686
TaxonAdjustedID.MGS.down.10000000.v6.1504	CAG01479	MGS	Bacteria;Firmicutes;Clostridia;Clostridiales;Lachnospiraceae;Dorea;Dorea longicatena 1	0.0979975	0.0219153	0.103551	-0.0829317	-0.0174751	-0.0459839	-0.116144	-0.042724	0.029144	0.0135748	-0.0205033	-0.0488919	-0.024997	0.028083	-0.0119425	-0.0492338	0.0403834	-0.0855483	0.0126594	0.0123117	-0.030143	0.139341	-0.0256216	-0.128721	0.0368986	0.0751107	0.086391	0.0506132	0.17135	-0.0262798	-0.0218957	0.0201309	0.0072879	0.0316738	0.0545531	0.0985162	-0.0236722	0.0872746	-0.0734284	-0.0820136	-0.0444428	0.0128851	-0.0418276	0.123805	0.0264645	-0.025928
TaxonAdjustedID.MGS.down.10000000.v6.1506	CAG01481	MGS	Bacteria;Bacteroidetes;Bacteroidia;Bacteroidales;Rikenellaceae;Alistipes;Alistipes onderdonkii	-0.0154339	-0.0580001	-0.0318346	0.0233125	0.00760563	-0.00818035	0.10795	0.0621575	-0.00287507	-0.0834096	-0.0596363	-0.0485656	-0.0573374	0.0439761	0.0562736	-0.0457642	-0.0644951	0.0567566	-0.0109188	-0.0934606	0.0705524	-0.0287974	-0.0938705	0.0727863	-0.0921338	0.102728	-0.125594	0.138958	-0.00315559	-0.0121049	-0.00821413	-0.071849	0.0717675	0.00595361	0.0416397	-0.05517	-0.0291863	-0.0867135	0.0185803	-0.11073	-0.0534643	0.124097	0.144298	-0.0308935	-0.0358112	-0.0197608
TaxonAdjustedID.MGS.down.10000000.v6.1508	CAG01483	MGS	unclassified;unclassified;unclassified;unclassified;unclassified;unclassified;unclassified	0.0758383	-0.0312537	-0.0601792	0.206332	-0.151614	0.149892	0.189657	0.0810659	0.0782742	-0.0498628	-0.0148391	0.146236	0.0779532	0.0286977	0.0360681	0.0299821	0.0295118	0.103451	0.0433239	-0.0608673	0.102053	-0.0184774	-0.106766	0.125697	0.0104808	0.0706167	-0.0381292	0.0552257	0.0134853	0.011076	-0.127148	0.0337193	0.0107932	0.00118072	0.0821567	0.0766732	0.031331	-0.107005	0.0829679	0.135319	0.0181552	0.0541742	0.145394	-0.0563624	0.168825	0.0845772
TaxonAdjustedID.MGS.down.10000000.v6.1514	CAG01489	MGS	Bacteria;Firmicutes;Clostridia;Clostridiales;Oscillospiraceae;Oscillibacter;Oscillibacter sp. KLE 1728 & KLE 1745 / Oscillospiraceae VE202-24	-0.0908093	-0.00667037	0.0147059	-0.015033	0.000848465	0.0206344	-0.0298669	-0.0251906	0.00131594	0.00578921	-0.10614	0.0222519	0.0226047	0.00672138	-0.0915764	-0.067512	-0.0400205	-0.0406286	0.130034	0.0168535	-0.0113179	0.0884881	0.0180711	-0.0898722	-0.0644465	-0.0486495	-0.0442455	-0.066575	-0.0475965	-0.035076	0.0184186	0.0207921	0.0499836	0.00557537	-0.0665434	-0.040228	0.0372118	-0.0284421	0.0241458	0.135362	-0.0107558	-0.0853643	0.00134076	0.0244611	0.033072	0.000199174
TaxonAdjustedID.MGS.down.10000000.v6.1519	CAG01494	MGS	Bacteria;Candidatus Melainabacteria;Candidatus Melainabacteria;Candidatus Gastranaerophilales;Candidatus Gastranaerophilales;Candidatus Gastranaerophilales;Candidatus Gastranaerophilales bacterium x14	0.144635	0.040801	0.0168857	0.0686408	-0.0869018	0.0167571	0.0688936	-0.0272856	-0.0956678	-0.112856	0.00960049	0.00190729	0.0103382	-0.0858648	-0.05468	0.0778106	-0.0976577	0.151557	-0.0497768	-0.0668127	-0.10708	-0.0357509	0.000111336	0.14735	-0.13885	0.0179568	-0.0136982	0.0774633	-0.0187943	-0.0789723	-0.0598699	-0.0727244	-0.0726042	-0.131572	0.032747	0.0520804	0.0504096	-0.0335683	0.0759762	-0.105322	-0.027482	0.00739951	-0.0870254	-0.00267293	0.179052	0.00271373
TaxonAdjustedID.MGS.down.10000000.v6.1524	CAG01498	MGS	Bacteria;Firmicutes;Clostridia;Clostridiales;Lachnospiraceae;Lachnoclostridium;Clostridium asparagiforme == lavalense	0.0240304	-0.0880439	-0.0428191	-0.072087	0.11605	-0.178284	-0.165632	-0.183453	-0.127443	-0.0231755	-0.148909	-0.155184	-0.0881033	-0.0960777	-0.0687474	-0.0524142	-0.120383	-0.0630895	-0.00647527	0.0187007	-0.146224	0.0555881	-0.0598846	-0.0215847	-0.0601382	-0.148153	-0.132698	-0.0129635	-0.118511	-0.120259	0.017454	0.0165911	-0.0584931	0.0392194	-0.102416	-0.0876556	-0.0171278	0.0346358	0.00696425	-0.0756226	0.0193128	0.0620473	-0.156579	-0.0409381	-0.0951161	-0.102984
TaxonAdjustedID.MGS.down.10000000.v6.1535	CAG50005	MGS	Bacteria;Firmicutes;Clostridia;Clostridiales;unclassified Clostridiales;unclassified Clostridiales;unclassified Clostridiales	0.0741148	-0.1231	0.0506257	0.00500944	-0.0551446	-0.00720989	-0.0775106	-0.0867292	-0.0593315	-0.0421553	-0.0527954	-0.013816	-0.0823768	-0.12849	-0.112925	-0.103486	0.0439757	-0.00372896	0.052009	-0.0578302	-0.0939583	0.0721694	-0.0194823	-0.108954	-0.0468182	0.0914565	-0.0646867	-0.0824955	0.0761601	-0.113895	-0.0113074	0.00131211	0.171222	0.0432748	0.0326441	0.0668179	-0.0590947	-0.0635668	-0.0271912	-0.0581877	-0.0684911	-0.0289765	-0.0241653	0.117336	0.0234168	0.0244735
TaxonAdjustedID.MGS.down.10000000.v6.1536	CAG01509	MGS	Bacteria;Firmicutes;Clostridia;Clostridiales;Lachnospiraceae;Blautia;unclassified Blautia	0.0531894	0.0750543	0.169654	-0.0999705	-0.065357	-0.0535326	0.177225	0.234931	0.0453056	-0.0369892	-0.0635148	0.0485617	-0.0478392	0.107917	-0.105702	0.0302839	-0.0569074	-0.124701	-0.0290215	-0.0063742	0.127473	-0.0573891	-0.0212709	0.112841	-0.0225754	0.0178553	0.0399528	0.035506	0.0796076	-0.0789384	0.0299608	-0.0715453	-0.106671	-0.137545	0.158555	-0.0813236	0.0673231	-0.119608	0.00752904	-0.143639	-0.132991	0.0406211	0.0977519	0.00941021	0.110875	-0.0611455
TaxonAdjustedID.MGS.down.10000000.v6.1550	CAG01522	MGS	Bacteria;Firmicutes;unclassified Firmicutes;unclassified Firmicutes;unclassified Firmicutes;unclassified Firmicutes;unclassified Firmicutes	0.168922	0.031744	-0.0969975	0.125806	-0.0328599	0.0677641	0.133502	0.130259	0.0368005	-0.0295965	0.0446557	0.0756253	0.127006	-0.0342463	0.061128	0.112783	-0.0131866	0.0586726	0.0865868	-0.0540627	0.109054	-0.0163288	-0.0500292	0.0536305	-0.0682572	0.0861116	0.0439791	-0.0097376	-0.0339235	0.031079	0.0581221	0.0267409	-0.0297572	-0.0213832	0.0674822	-0.0434084	-0.0881822	-0.0675396	0.0528296	0.0115921	0.0120257	0.0449829	0.0513808	-0.0414302	0.0886154	0.0760309
TaxonAdjustedID.MGS.down.10000000.v6.1554	CAG01525	MGS	Bacteria;Firmicutes;unclassified Firmicutes;unclassified Firmicutes;unclassified Firmicutes;unclassified Firmicutes;unclassified Firmicutes	0.113412	0.172112	-0.00578184	0.218337	-0.217641	0.072535	-0.0333456	-0.0353258	-0.0280572	-0.058103	0.0406583	0.00396079	0.148354	0.0752737	0.0263987	0.123476	0.0515908	0.100879	0.0638525	-0.141255	-0.0152536	-0.00935763	-0.0115551	-0.0770865	-0.0256213	-0.0740856	0.0340112	-0.0480873	0.0277524	0.0851386	-0.138322	0.110462	0.00620731	-0.00890135	-0.0411572	0.136134	0.122495	0.0105028	0.088582	0.11846	-0.00142675	-0.020008	0.00850493	-0.0532283	0.121087	-0.0435778
TaxonAdjustedID.MGS.down.10000000.v6.1561	CAG01532	MGS	Bacteria;Firmicutes;Clostridia;Clostridiales;Lachnospiraceae;Eisenbergiella;Eisenbergiella tayi	0.0606963	-0.0905401	-0.00681248	-0.000176244	0.00691127	0.0309081	-0.00449933	-0.0350977	-0.1031	0.00612393	-0.0295218	0.0549278	0.0259856	-0.108905	0.00321824	-0.0142681	-0.00842755	-0.00735328	0.15179	-0.0649999	-0.0767609	0.0144211	0.0843903	-0.0658399	-0.0303344	0.0497874	-0.101251	0.0771319	-0.00190891	-0.117294	-0.0401876	0.0475117	0.0352097	0.0267864	-0.159751	-0.0794965	-0.0122853	0.0875285	0.0797277	-0.043175	0.0306458	0.0212204	-0.0200762	0.0195878	-0.111446	0.069072
TaxonAdjustedID.MGS.down.10000000.v6.1564	CAG01535	MGS	Bacteria;Proteobacteria;Alphaproteobacteria;Rhodospirillales;Rhodospirillaceae;Azospirillum;unclassified Azospirillum	0.0870959	-0.0914549	0.00387297	0.0122196	-0.016327	-0.0543052	0.00548508	-0.00490501	-0.00503113	-0.102066	-0.104233	-0.00534594	0.00264855	-0.0745372	-0.0125614	0.0187918	-0.0916258	0.035564	0.0817973	-0.0112965	-0.00121415	0.0414507	0.12043	-0.0104469	-0.0654705	-0.00663825	0.0751173	-0.000318461	0.0169949	-0.0837212	0.0411008	-0.0853294	-0.0156239	-0.0714877	-0.010609	-0.0291188	-0.0717802	-0.12973	-0.0428933	-0.0629863	-0.080371	0.033956	-0.00646366	0.0984612	0.0787587	0.0138912
TaxonAdjustedID.MGS.down.10000000.v6.157	CAG00243	MGS	Bacteria;Firmicutes;Clostridia;Clostridiales;Lachnospiraceae;Blautia;Ruminococcus torques	-0.102803	-0.0473997	0.035976	-0.0242354	-0.0107533	0.0444605	-0.169332	-0.199768	-0.0661924	0.20741	-0.0442638	0.050197	-0.0472052	0.124041	0.0107845	0.00517246	-0.0161465	0.0662691	0.10822	0.010052	-0.152401	0.138824	-0.0151084	-0.139554	-0.10018	-0.0217225	-0.0212592	0.0100022	0.0429261	0.157715	0.0731791	0.166696	0.116582	0.061114	-0.183088	0.117661	0.0592307	0.0450734	0.00156945	0.0778243	-0.0168624	0.00607868	-0.156378	0.112518	-0.000116551	-0.0212143
TaxonAdjustedID.MGS.down.10000000.v6.1571	CAG01541	MGS	Bacteria;Firmicutes;Clostridia;Clostridiales;Lachnospiraceae;Coprococcus;Coprococcus catus	0.0900574	0.0620737	0.0864739	-0.0463895	-0.0379839	0.105665	-0.0135452	0.0547895	-0.0761628	-0.0642712	-0.0224719	0.0605372	0.0218495	0.0418258	0.194782	-0.0131908	-0.0508487	-0.0840808	0.0187779	0.025986	0.0487168	0.0640244	0.0839707	-0.0732159	-0.0676932	0.0787885	0.0355536	0.0215971	-0.00996894	-0.0300977	-0.0287907	-0.0112378	-0.0307835	-0.0307739	0.0664661	0.0114359	0.0138119	-0.00677375	-0.0232408	-0.08693	-0.0516315	0.00298459	0.0704263	0.0829278	0.023164	-0.0718136
TaxonAdjustedID.MGS.down.10000000.v6.1582	CAG01553	MGS	Bacteria;Firmicutes;Clostridia;Clostridiales;Ruminococcaceae;Anaeromassilibacillus;Anaeromassilibacillus sp. An250	0.00648153	-0.138428	-0.0902979	0.128744	-0.0424846	0.0439974	-0.121965	-0.179436	0.0281067	0.0346339	-0.00211609	0.0491135	0.053306	-0.035898	-0.0184722	0.157776	-0.0230297	0.0914518	0.14081	-0.118561	-0.198129	0.0246249	0.0207645	-0.14909	-0.136088	-0.0304381	-0.0870049	-0.0160544	-0.0288154	0.0370636	0.032631	0.115674	0.198226	0.116386	-0.0903953	0.0968077	-0.0439552	0.0479968	0.0788468	0.0637114	0.0176026	-0.102086	-0.00055947	-0.0317165	0.0289513	0.0566917
TaxonAdjustedID.MGS.down.10000000.v6.1591	CAG01561	MGS	Bacteria;Firmicutes;Clostridia;Clostridiales;unclassified Clostridiales;unclassified Clostridiales;Clostridium sp. KLE 1755 & Clostridiales bacterium VE202-27	0.10909	-0.0530108	-0.0448816	-0.0318814	0.0769586	-0.0907166	-0.0225753	-0.0583182	0.0052406	0.120065	-0.135173	-0.0811542	-0.114492	-0.0788011	-0.0116228	-0.0225021	0.0141879	0.00816279	0.0423778	0.0109281	-0.0122053	0.0922008	-0.0792234	0.0263059	-0.0160389	0.0152785	-0.130322	0.0184449	-0.0133896	-0.122932	-0.0168663	-0.0111927	0.10242	0.0593546	-0.0940932	-0.145679	-0.0659468	-0.0203377	0.0129957	-0.0398991	-0.0640381	0.0338675	-0.00328956	0.0291634	-0.0891093	0.0243785
TaxonAdjustedID.MGS.down.10000000.v6.1596	CAG01565	MGS	Bacteria;Bacteroidetes;Bacteroidia;Bacteroidales;Barnesiellaceae;Coprobacter;Coprobacter secundus == Gabonia massiliensis	-0.12029	0.0134169	0.0361878	0.0351594	-0.0717222	-0.0474205	0.0307122	0.00811284	0.0785462	-0.0945178	-0.0125655	-0.10073	0.0399831	0.108188	-0.165224	-0.0612869	-0.148112	0.0606682	0.0643422	-0.0303229	-0.0226022	-0.0874035	-0.0435023	0.00391684	-0.0613578	-0.0567722	0.0148031	0.163949	0.0579935	0.0561853	0.0377623	-0.00854218	0.124979	0.00751293	0.103724	0.0533223	0.123403	-0.00744862	0.0292691	-0.0209739	-0.0573312	0.0356439	0.0271309	0.0564715	0.0359874	0.0501331
TaxonAdjustedID.MGS.down.10000000.v6.16	CAG00024	MGS	Bacteria;Bacteroidetes;Bacteroidia;Bacteroidales;Bacteroidaceae;Bacteroides;Bacteroides fragilis 1	0.0671562	-0.0766208	-0.100684	0.049355	0.0489899	-0.0229879	-0.0542823	-0.04831	-0.0104122	0.0514291	-0.0891375	0.0166385	-0.0912065	-0.163511	0.0417026	0.0792716	-0.0411854	0.0555876	0.0651952	0.00626534	-0.0828296	0.0142586	0.0469455	-0.00705619	-0.0866819	0.000262612	-0.158017	-0.0283238	-0.0650158	-0.00591897	-0.105184	0.0389113	0.049483	-0.0213301	-0.0034723	-0.0265516	-0.00256625	-0.015635	0.0434322	-0.0892458	-0.0504968	-0.120584	-0.0388853	0.0375193	-0.00664029	-0.0697448
TaxonAdjustedID.MGS.down.10000000.v6.160	CAG00152	MGS	Bacteria;Firmicutes;unclassified Firmicutes;unclassified Firmicutes;unclassified Firmicutes;unclassified Firmicutes;unclassified Firmicutes	0.14648	0.0297718	0.0573123	0.100413	-0.159348	0.12644	0.101094	0.103297	0.0434383	-0.0594307	-0.031933	0.10996	0.123799	0.0554723	0.0782559	0.0201017	-0.00676412	0.0630521	0.0110638	0.00255241	0.196168	-0.0550053	-0.089949	0.044923	0.0563405	0.141419	-0.0637767	0.0613747	0.0397433	-0.0688275	-0.0248871	0.00598574	-0.0262259	-0.0849173	0.00353559	0.0378692	0.047872	-0.0727638	-0.0253214	0.0668533	0.0359212	0.0693609	0.0804687	-0.0859004	0.0386574	0.165445
TaxonAdjustedID.MGS.down.10000000.v6.1608	CAG01577	MGS	Bacteria;Firmicutes;unclassified Firmicutes;unclassified Firmicutes;unclassified Firmicutes;unclassified Firmicutes;unclassified Firmicutes	0.191691	0.0938034	-0.116119	0.13522	-0.023597	0.111786	0.145921	0.0809177	0.070629	-0.0201747	0.00604736	0.0699277	0.258803	0.0588399	0.0252937	0.0804221	-0.0156203	0.0395863	0.0236694	-0.0108299	0.14317	-0.0343527	0.0652919	0.122356	-0.00437641	-0.0158876	-0.0575167	0.0660391	-0.130381	-0.0247877	-0.0909633	-0.00622816	-0.054787	0.0236475	-0.0433183	-0.00731678	0.0429531	-0.111718	0.0637392	0.0328481	0.044291	-0.00371787	0.0353767	-0.0451201	0.00387637	0.159168
TaxonAdjustedID.MGS.down.10000000.v6.1610	CAG01579	MGS	Bacteria;Firmicutes;Clostridia;Clostridiales;Clostridiaceae;Hungatella;Hungatella hathewayi 1	0.0645071	-0.0738492	-0.0610094	-0.00748051	0.0679319	-0.0804577	-0.0439954	-0.159283	-0.0582364	0.0416757	0.0317986	-0.0681102	0.0482642	-0.0917204	-0.0271672	0.0403095	-0.0297567	0.00794411	0.0525611	-0.0131521	-0.101886	-0.0188959	0.0181687	0.088227	-0.0202676	-0.0167731	-0.0575298	0.0621996	-0.0139756	-0.08194	-0.0799055	1.81e-05	0.0469362	-0.00876427	-0.127196	-0.00810982	-0.00355246	0.0321818	0.0120707	0.00744565	0.0593822	0.0431541	-0.161249	-0.109749	-0.0211606	-0.0116724
TaxonAdjustedID.MGS.down.10000000.v6.1614	CAG01583	MGS	Bacteria;Firmicutes;unclassified Firmicutes;unclassified Firmicutes;unclassified Firmicutes;unclassified Firmicutes;unclassified Firmicutes	0.142176	-0.00240632	0.0510597	0.209269	-0.264526	0.17789	0.204402	0.123055	0.0710937	-0.113125	-0.0142037	0.100597	0.234643	0.110146	0.0235091	0.107284	-0.0660672	0.0646113	0.0839363	-0.0563676	0.105944	0.0489157	0.0710372	0.101117	-0.0965817	0.120864	-0.0733082	0.0701244	0.0110582	-0.030845	-0.0688124	0.0106281	0.065771	-0.0348974	-0.00658644	0.0732232	0.123251	-0.124079	0.0940717	0.0633353	-0.0600686	-0.0464143	0.175396	0.067339	0.0896791	0.216354
TaxonAdjustedID.MGS.down.10000000.v6.1616	CAG01585	MGS	Bacteria;Bacteroidetes;Bacteroidia;Bacteroidales;Bacteroidaceae;Bacteroides;Bacteroides ovatus	-0.171625	0.0529109	-0.0430407	-0.103807	0.148718	0.0689544	-0.0288121	-0.0480832	-0.0543164	0.0570186	0.0288177	0.0617088	0.0453628	-0.0374314	0.00365342	-0.0225973	0.0673924	-0.0849504	-0.0326766	0.0270069	-0.0985939	0.0727218	-0.0161025	-0.0261019	-0.0654071	-0.0651447	-0.131423	-0.0973207	-0.0442753	0.100693	0.158062	0.00738606	-0.00636921	0.0321992	-0.0179119	-0.127959	0.0500659	0.104261	0.0371971	-0.0457526	0.0910144	-0.0102357	-0.00771393	0.00766852	-0.0826331	-0.0429907
TaxonAdjustedID.MGS.down.10000000.v6.1618	CAG01587	MGS	Bacteria;Firmicutes;unclassified Firmicutes;unclassified Firmicutes;unclassified Firmicutes;unclassified Firmicutes;unclassified Firmicutes	0.116174	0.0629416	0.0462938	0.109481	-0.157737	0.0926874	0.0094066	0.0182727	0.0447291	0.0193619	-0.0179895	0.063413	0.0947812	0.021202	-0.00320452	0.0447995	0.0850046	0.104658	0.0404577	-0.00680902	0.0931269	-0.0460298	0.0667767	-0.0569747	0.0348977	0.0513864	-0.0203427	0.0116824	0.06932	-0.0521297	-0.0272607	0.0705133	-0.0325266	-0.0120573	0.0111185	0.0987127	0.0184443	-0.103765	0.0568605	0.170435	0.0262857	0.0916401	0.00251165	-0.0201333	0.0546191	0.033737
TaxonAdjustedID.MGS.down.10000000.v6.1620	CAG01589	MGS	Bacteria;Firmicutes;unclassified Firmicutes;unclassified Firmicutes;unclassified Firmicutes;unclassified Firmicutes;unclassified Firmicutes	0.104525	-0.0741666	0.0884626	-0.129689	0.0452651	0.0316255	-0.0673249	-0.0497254	-0.0147409	0.0407864	-0.123992	-0.0935653	-0.0556092	0.0164418	-0.0545647	-0.0987736	0.119678	-0.0629525	-0.00106623	0.0993575	0.0667834	-0.0637082	0.0441546	0.0384869	0.108451	-0.00824561	-0.0926451	0.0925926	0.034044	-0.0944223	-0.0261887	-0.102313	0.0331903	0.0800521	0.0304764	0.0306215	-0.0490115	-0.156776	-0.017361	-0.0301519	0.0164552	0.100721	-0.037611	-0.0226537	-0.0613992	0.0910016
TaxonAdjustedID.MGS.down.10000000.v6.1625	CAG01593	MGS	Bacteria;Proteobacteria;Gammaproteobacteria;Enterobacterales;Enterobacteriaceae;Escherichia;Escherichia coli	0.178729	0.00767105	0.187811	-0.102081	-0.0811379	-0.00449218	0.0161608	0.0273124	0.0938559	0.00590125	0.0112758	0.0253332	-0.108835	0.100864	0.0541604	-0.14062	0.0878836	0.0221339	0.0133393	0.0351832	0.00978048	-0.02541	-0.0163966	-0.0784101	-0.038246	0.0314136	0.155548	0.0351738	0.0497004	-0.0331861	0.0252617	-0.0808438	0.0787111	0.00956125	0.152138	-0.00326579	0.0285628	0.0472701	0.105413	-0.0224834	-0.0570903	0.164223	0.0594228	0.0470811	0.0979539	0.0112004
TaxonAdjustedID.MGS.down.10000000.v6.1628	CAG01596	MGS	Bacteria;Bacteroidetes;Bacteroidia;Bacteroidales;Bacteroidaceae;Bacteroides;Bacteroides plebeius	0.00685913	-0.024142	0.0617139	0.0813874	-0.144233	-0.0704039	0.0500168	0.0828428	0.0630897	-0.0774311	0.012417	-0.121884	0.0295885	-0.0213815	-0.060293	-0.062616	-0.108187	0.10985	-0.0323862	-0.106684	0.0267579	0.0391986	-0.0384709	0.0604458	0.0402008	0.0659077	0.0639888	0.0633342	0.068275	-0.0225143	-0.0306802	-0.025595	0.0253914	-0.0964157	0.0833585	0.0291224	-0.0622344	0.0281492	0.0295437	-0.0656342	-0.115528	-0.0417396	0.116072	0.0700981	0.0433602	-0.0849479
TaxonAdjustedID.MGS.down.10000000.v6.1629	CAG01597	MGS	Bacteria;Verrucomicrobia;unclassified Verrucomicrobia;unclassified Verrucomicrobia;unclassified Verrucomicrobia;unclassified Verrucomicrobia;unclassified Verrucomicrobia	0.0926327	-0.0272354	0.0711521	0.0284457	-0.0994003	0.118023	0.158932	0.11438	0.0475383	0.0564087	0.0624056	0.130131	0.00661885	0.0643555	0.0602921	0.0290324	0.00548044	0.0115754	0.159948	-0.0463392	0.139075	-0.0126437	0.109576	0.0184846	0.0689096	0.128133	0.0508326	-0.109578	0.0395283	0.0202244	0.0556791	0.00130219	-0.0881889	0.0323423	0.04435	0.0332481	0.0672534	-0.0770707	0.0195858	0.0350432	-0.0914862	0.0106665	0.111283	-0.0475569	0.109517	0.0765194
TaxonAdjustedID.MGS.down.10000000.v6.1632	CAG01600	MGS	Bacteria;Firmicutes;Clostridia;Clostridiales;Eubacteriaceae;Eubacterium;unclassified Eubacterium	0.0756861	0.0605395	0.156814	-0.0906949	-0.0621589	-0.060419	0.0917799	0.132186	-0.0289209	-0.0587166	0.00594407	-0.0480223	-0.0219193	0.0725563	0.0090466	-0.15385	-0.040031	-0.0425918	-0.155403	0.0148605	0.161228	0.0891257	0.0985857	-0.027687	-0.0803828	0.0904553	0.0715619	-0.0336536	-0.0311575	-0.194883	-0.00200135	-0.0753835	-0.0425718	-0.0581836	0.0829092	0.00287752	0.00761402	-0.104816	-0.0672426	-0.102589	-0.149231	-0.0135334	0.0853233	0.0185037	0.13856	-0.0509883
TaxonAdjustedID.MGS.down.10000000.v6.1633	CAG01601	MGS	Bacteria;Proteobacteria;Gammaproteobacteria;Pasteurellales;Pasteurellaceae;Haemophilus;Haemophilus parainfluenzae	-0.0675776	0.0535365	0.165237	-0.0014266	-0.161801	0.00455518	0.000531901	0.100942	0.0935484	-0.050806	-0.0863637	0.00945073	0.0917962	0.0961109	-0.00878261	-0.138443	0.0306283	0.0567344	-6.88e-05	-0.0622475	0.030436	0.170586	0.011211	-0.0588102	-0.046221	0.123789	-0.0345577	-0.0560244	0.0175377	0.0329271	-0.0614224	-0.0672948	0.0386429	0.0229643	0.111647	-0.0227283	-0.0790626	0.0933976	0.0640413	0.0165846	-0.149024	0.0180713	0.0659919	-0.00851296	-0.0234515	-0.0591154
TaxonAdjustedID.MGS.down.10000000.v6.1638	CAG01606	MGS	unclassified;unclassified;unclassified;unclassified;unclassified;unclassified;unclassified	0.132558	-0.0776094	-0.0947835	0.0281633	0.0648391	0.123764	-0.00268386	-0.0455014	-0.00117036	0.0200494	0.0605116	0.102856	0.0968632	-0.0312692	-0.0662364	0.102492	0.126897	0.0390155	0.101126	0.117915	0.0150919	-0.000272771	0.0381395	-0.0728006	0.0465395	0.0509359	0.0355874	0.12098	0.070477	-0.0445467	-0.00898515	0.045788	0.143107	0.097769	-0.107967	0.12583	-0.0252791	-0.0800202	0.0748601	-0.00767505	0.0176329	-0.00486674	-0.104064	0.00537191	0.055289	0.0424214
TaxonAdjustedID.MGS.down.10000000.v6.1639	CAG01607	MGS	Bacteria;Firmicutes;Negativicutes;Veillonellales;Veillonellaceae;Veillonella;Veillonella parvula	0.091293	-0.00804777	-0.0661867	0.0784592	-0.0148672	0.156847	0.0732024	0.034624	0.0502743	0.0903337	0.0673738	0.0927204	0.124921	-0.043251	0.0269961	0.0395994	0.0385557	-0.0101477	0.0118824	-0.0599494	0.0468757	0.184924	0.056403	0.000233642	-0.0397098	0.137154	0.0258788	-0.0903967	-0.00131018	0.129344	-0.0728143	0.146343	-0.0246601	0.0466851	0.0548044	0.00277816	0.0505013	0.16221	0.0565628	0.0493808	0.000917964	-0.0145811	-0.0340912	-0.145592	0.0605709	-0.0377701
TaxonAdjustedID.MGS.down.10000000.v6.1647	CAG01615	MGS	Bacteria;Firmicutes;Clostridia;Clostridiales;Eubacteriaceae;Eubacterium;Eubacterium eligens	-0.0908431	-0.0229041	0.161395	-0.230672	0.076509	-0.0406105	0.0694681	0.154095	0.0139098	-0.0623155	-0.0609003	-0.0896792	-0.0435226	0.132865	0.000225703	-0.176914	-0.022277	-0.122357	-0.0867275	0.0990382	0.149866	0.0976259	0.0909115	0.0223615	0.0213622	0.0665396	-0.0209372	-0.0235249	-0.00279313	-0.0563759	0.0415164	-0.108601	-0.0320063	-0.0362472	0.125697	-0.117138	-0.00489995	-0.0251519	-0.0555475	-0.198192	-0.0482046	0.131325	0.125767	0.137221	-0.118504	0.0233743
TaxonAdjustedID.MGS.down.10000000.v6.1649	CAG01617	MGS	Bacteria;Firmicutes;Bacilli;Lactobacillales;Streptococcaceae;Streptococcus;Streptococcus salivarius	0.00486521	0.0474162	0.120647	-0.0503036	-0.0677443	-0.039287	-0.0620782	0.0205428	-0.00453409	-0.00230415	-0.037056	-0.0241929	0.0499344	0.107126	-0.0200618	-0.116254	-0.00489101	-0.0558704	0.0729868	-0.017785	-0.0513709	0.0962624	0.0926708	-0.0914725	0.00152931	0.0626666	-0.0866423	-0.0268429	0.0199378	0.0761668	-0.0285625	-0.026105	0.0276874	0.0194791	0.102668	-0.0469933	-0.0475296	-0.0150803	0.0542031	-0.0602472	0.047226	-0.096221	0.0288133	-0.0108349	0.000798817	-0.130534
TaxonAdjustedID.MGS.down.10000000.v6.1652	CAG01620	MGS	Bacteria;Candidatus Melainabacteria;Candidatus Melainabacteria;Candidatus Gastranaerophilales;Candidatus Gastranaerophilales;Candidatus Gastranaerophilales;Candidatus Gastranaerophilales bacterium x14	0.0498419	-0.0327918	-0.0583378	0.13682	-0.0823237	0.0548394	0.0587036	-0.0335957	0.14841	-0.0477516	-0.0216959	0.0514269	0.016832	-0.0598354	0.00390851	0.0983329	-0.0843584	0.203715	0.102805	-0.121744	0.0204756	0.080907	-0.0568858	0.0418277	0.0357185	0.113871	0.0237484	-0.0886803	-0.0339194	0.0245361	0.0347469	0.0527898	0.180705	0.0884639	-0.0367483	0.147984	0.0223396	-0.0261887	0.0142393	0.00396349	-0.0777252	-0.000454013	0.13542	0.0233464	0.102898	0.0414601
TaxonAdjustedID.MGS.down.10000000.v6.1653	CAG01621	MGS	Bacteria;Bacteroidetes;Bacteroidia;Bacteroidales;Prevotellaceae;Paraprevotella;Paraprevotella clara	0.118584	0.13784	-0.0156977	0.173147	-0.161615	0.0357033	-0.0117722	0.0182831	0.0493232	-0.0727569	0.0768746	-0.070694	0.154013	-0.0134443	-0.107599	0.0641113	-0.0420358	0.0621882	-0.0514214	-0.0932571	-0.00198123	-0.0216536	0.0496446	-0.0885809	-0.0687811	0.00406317	0.0751012	-0.173405	-0.0101431	0.0180435	-0.0804179	0.02038	-0.052679	-0.047103	-0.0278795	0.0766234	-0.195633	0.0522379	0.0429927	0.0235005	-0.0860268	-0.0159009	0.0356142	-0.086538	0.148732	-0.0908627
TaxonAdjustedID.MGS.down.10000000.v6.1655	CAG01623	MGS	Bacteria;Bacteroidetes;Bacteroidia;Bacteroidales;Odoribacteraceae;Butyricimonas;Butyricimonas virosa	0.0893026	-0.0220883	0.145667	-0.086771	-0.0551597	0.0493024	-0.0874384	-0.0220643	-0.0341376	0.0368008	-0.160621	0.0321176	-0.0911546	-0.0152627	0.0612384	-0.0859582	0.0139057	-0.0511388	0.0736931	-0.00322003	0.0603582	0.13631	0.0644604	-0.175982	-0.00379664	0.0980986	-0.047958	-0.0305605	0.0361318	-0.0806613	0.105616	-0.0467851	0.132658	0.050736	0.023372	0.0161145	-0.00671651	-0.0723683	-0.0158844	-0.0830406	-0.0211847	-0.134617	-0.031779	0.126837	-0.0571618	-0.0503596
TaxonAdjustedID.MGS.down.10000000.v6.1659	CAG01627	MGS	Bacteria;Proteobacteria;Gammaproteobacteria;Pseudomonadales;Moraxellaceae;Acinetobacter;Acinetobacter sp. N54.MGS-139 / Proteobacteria bacterium CAG:139	-0.00973829	-0.0846355	-0.0117113	-0.0336462	0.0459905	-0.0457767	0.0396737	0.0287688	0.0898094	-0.0220983	0.0199993	-0.105789	-0.00810124	-0.0566797	0.036942	0.0316549	-0.0015698	-0.0226248	0.0761583	-0.0227315	0.000404545	0.0732072	0.0601089	0.0239803	-0.0518073	0.022377	0.0213028	0.0452764	-0.02971	-0.0548485	-0.045686	-0.00910557	0.125961	-0.0545125	-0.0106341	-0.0634479	-0.0624648	-0.0452722	0.00247533	-0.0393805	-0.0199051	-0.0965086	-0.0426291	0.0208072	-0.0531132	-0.0608743
TaxonAdjustedID.MGS.down.10000000.v6.1677	CAG01644	MGS	Bacteria;Firmicutes;unclassified Firmicutes;unclassified Firmicutes;unclassified Firmicutes;unclassified Firmicutes;unclassified Firmicutes	0.0847832	-0.139558	0.0016501	-0.0240123	0.0229337	0.00490736	-0.0292866	-0.00885381	-0.101626	-0.0883412	-0.187827	0.0779884	-0.0694284	-0.0899645	-0.0195728	-0.0190805	-0.0999102	0.0436409	-0.0232411	-0.0137386	0.021457	0.0943213	-0.0161221	-0.0222717	0.012608	0.0417132	-0.115111	-0.0244286	-0.0205711	-0.0795969	0.0565777	-0.0166266	-0.0534262	-0.0239915	-0.0863009	-0.0216263	0.0500145	-0.0733759	-0.078647	-0.0180087	0.011681	-0.0466273	-0.0159049	0.0241166	-0.0559992	-0.0389236
TaxonAdjustedID.MGS.down.10000000.v6.168	CAG00159	MGS	Bacteria;Bacteroidetes;Bacteroidia;Bacteroidales;Bacteroidaceae;Bacteroides;Bacteroides uniformis	-0.0704627	-0.186086	0.00375461	-0.112703	0.111584	-0.0315165	-0.0588812	-0.0296544	-0.0197279	0.00485975	-0.105739	-0.0481435	-0.0297337	-0.072843	0.00584516	-0.0316527	0.020289	-0.0838324	-0.0122988	0.0771491	-0.084752	0.011276	0.00813698	-0.0725965	-0.0251245	-0.0635782	-0.0703134	-0.0338541	0.0385861	0.00372629	0.178237	-0.0174904	0.0685025	-0.04117	0.00518579	-0.108457	-0.0335327	0.0840627	-0.0776306	-0.102842	0.0557213	-0.0417643	-0.0262448	0.0508114	-0.133107	-0.024304
TaxonAdjustedID.MGS.down.10000000.v6.1685	CAG01652	MGS	Bacteria;Proteobacteria;Gammaproteobacteria;Enterobacterales;Enterobacteriaceae;Escherichia;Escherichia coli	0.0917396	-0.0874415	0.116929	-0.114301	0.00139776	-0.0154126	-0.0561228	0.0231567	0.157394	0.0687539	-0.0418618	-0.100424	-0.0272007	0.0382531	-0.0201221	-0.144717	0.129213	0.0537267	0.0508258	0.0530028	0.00554625	0.00628869	0.0439485	-0.0408853	0.0754593	0.0554101	0.111135	0.244621	0.0736411	0.0149309	0.0152435	-0.0343315	0.0368835	0.0288835	0.0862767	-0.0375777	0.0322416	0.0838216	0.0434644	-0.0164618	-0.0278788	0.17838	0.0294967	0.0762048	-0.0573187	-0.016119
TaxonAdjustedID.MGS.down.10000000.v6.169	CAG00160	MGS	Bacteria;Firmicutes;unclassified Firmicutes;unclassified Firmicutes;unclassified Firmicutes;unclassified Firmicutes;unclassified Firmicutes	0.0995823	-0.100265	0.014999	-0.0484747	0.034769	-0.0419783	-0.038097	0.0171887	-0.0660047	-0.139804	-0.144312	0.0512896	-0.118337	-0.0374454	0.0847657	-0.0357093	-0.0832668	-0.0666928	-0.0350243	-0.0207757	-0.0122308	0.011811	-0.107431	-0.0267178	-0.019645	0.0488511	-0.0584369	0.0209464	-0.0131077	-0.101303	0.127673	-0.0865777	0.0152522	-0.0241144	0.0419014	-0.0934807	0.0687871	-0.077293	0.0136139	-0.125654	0.0166883	0.0379659	0.0612147	0.0362608	-0.084479	-0.024305
TaxonAdjustedID.MGS.down.10000000.v6.17	CAG00025	MGS	Bacteria;Firmicutes;Clostridia;Clostridiales;Clostridiaceae;Hungatella;Hungatella hathewayi 1	0.104669	-0.0511892	-0.00299066	-0.0467715	0.0508012	-0.0639254	-0.0593112	-0.145053	-0.0205636	0.0171791	0.0175853	-0.0308814	-0.0514983	-0.0745718	-0.0472556	0.0217917	0.0243605	-0.00702326	0.058227	-0.0174182	-0.0995249	0.0138855	0.00684812	-0.0174444	0.00898183	-0.0278888	-0.0396957	0.0360893	0.00790101	-0.088752	-0.0225164	-0.00266058	0.055224	-0.0166233	-0.096323	-0.0574413	0.00439055	0.0378139	0.0403557	0.00657664	0.0359483	-0.000565291	-0.200631	-0.0937464	-0.0263102	-0.00635673
TaxonAdjustedID.MGS.down.10000000.v6.1707	CAG01883	MGS	Bacteria;Bacteroidetes;Bacteroidia;Bacteroidales;Bacteroidaceae;Bacteroides;Bacteroides thetaiotaomicron	0.020694	0.0513105	0.0402534	-0.0720547	0.0339386	-0.0580545	-0.105604	0.0135057	0.0832	-0.0057147	-0.0438629	0.0122611	-0.0783942	-0.0570241	0.0917219	-0.059141	-0.0403417	-0.0181237	-0.0387874	0.0228888	-0.0401088	-0.00624839	-0.0587994	-0.0836859	0.102688	0.0144944	-0.045409	-0.0799683	-0.0633725	0.0275232	-0.0602973	-0.0822234	0.0541442	0.0723381	0.02855	-0.0146303	-0.103589	-0.104448	0.0431933	-0.0764858	-0.0990936	-0.0942428	0.0251891	-0.0655479	-0.0515109	-0.104086
TaxonAdjustedID.MGS.down.10000000.v6.171	CAG00854	MGS	Bacteria;Firmicutes;Clostridia;Clostridiales;unclassified Clostridiales;unclassified Clostridiales;unclassified Clostridiales	0.17636	-0.0018681	0.118477	0.0789687	-0.197843	0.139249	0.137419	0.116619	0.0818707	-0.0583815	-0.0437993	0.0912534	0.14225	0.0600091	0.0524457	-0.0195073	0.0476372	0.078767	-0.0183701	-0.0295991	0.117277	-0.0227981	-0.0226995	-0.0511471	-0.00598309	0.101097	0.0478004	0.0596949	0.12815	-0.104005	0.00556976	-0.00664059	0.0446539	-0.0320822	0.0287182	0.0527668	0.0381636	-0.0125388	0.0657306	0.050837	-0.0795426	0.0726783	0.0901722	-0.00252316	0.14454	0.129605
TaxonAdjustedID.MGS.down.10000000.v6.1710	CAG01809	MGS	Bacteria;Firmicutes;Clostridia;Clostridiales;Lachnospiraceae;Lachnoclostridium;unclassified Lachnoclostridium	-0.0979386	-0.0249165	-0.173825	0.0618255	0.108499	0.0149334	-0.140985	-0.141629	-0.0467501	0.135886	0.13101	-0.00994945	-0.00511909	-0.132404	-0.0073148	0.138721	0.0529171	0.0358927	0.118887	0.0127692	-0.24218	-0.0108296	0.0543885	-0.0919162	-0.0448771	-0.068591	0.00920693	-0.0812787	0.0210214	0.0782716	-0.0644953	0.134724	0.0826199	0.0863208	-0.0793086	-0.00343121	-0.0924143	0.203855	0.0697042	0.105801	0.041046	-0.14977	-0.143657	0.03114	0.0114116	-0.105862
TaxonAdjustedID.MGS.down.10000000.v6.1713	CAG01675	MGS	Bacteria;Firmicutes;Negativicutes;Veillonellales;Veillonellaceae;Veillonella;Veillonella dispar	0.0328243	0.062442	-0.00490382	0.0281156	-0.0239165	0.0699835	0.0828884	0.12312	0.0352427	0.0682937	0.109594	0.058407	0.104356	0.0101498	-0.0197537	-0.0115605	0.0625116	-0.0299691	0.0136209	-0.0487812	0.0244982	0.124013	0.0216856	0.0194518	-0.0357607	0.0949441	0.00643833	-0.0672311	0.0246902	0.051716	-0.161703	0.0157794	-0.0254062	0.0270634	0.136054	-0.0450556	-0.048451	0.118627	0.108319	-0.0174199	-0.0197366	0.0411885	0.0148736	-0.114949	0.0859402	-0.0238321
TaxonAdjustedID.MGS.down.10000000.v6.1731	CAG01693	MGS	Bacteria;Actinobacteria;Coriobacteriia;Coriobacteriales;Coriobacteriaceae;Collinsella;Collinsella aerofaciens	-0.0332174	0.0757877	-0.109856	0.0474121	0.0600402	-0.0411657	-0.0574741	-0.0546838	-0.0617222	-0.060788	0.0806884	-0.0295973	0.120625	-0.0853903	0.0110768	0.0422462	-0.0824496	0.0122373	-0.036785	-0.0651548	-0.0958224	0.11225	-0.00265214	-0.128592	0.0344976	-0.0178529	-0.00921869	-0.0588724	-0.0759646	0.0548437	0.00691032	0.0618592	0.00146392	-0.0666353	-0.0570088	0.0533229	-0.0599984	0.0923013	0.0165026	0.0549465	-0.0317094	-0.0764483	-0.0299048	0.066942	0.0108912	-0.118534
TaxonAdjustedID.MGS.down.10000000.v6.1732	CAG01694	MGS	Bacteria;Firmicutes;Negativicutes;Veillonellales;Veillonellaceae;Veillonella;Veillonella dispar	0.0125559	0.00658334	-0.0176329	0.037689	-0.0211331	0.0760829	0.107016	0.0999186	0.0474845	0.0693139	0.0907495	0.0848907	0.116306	0.0270527	-0.0067183	-0.0205593	0.0523188	-0.0453613	0.0306015	-0.0437705	0.0114936	0.0924976	-8.18e-05	0.013671	-0.0739042	0.0685246	0.0128895	-0.0476166	0.0388696	0.0508537	-0.133983	0.0179332	-0.0366972	0.0245354	0.115323	-0.0466744	-0.0625438	0.102957	0.116348	0.00690607	0.00646602	0.0361868	0.0200338	-0.105906	0.141915	-0.0170966
TaxonAdjustedID.MGS.down.10000000.v6.1737	CAG01699	MGS	Bacteria;Firmicutes;Clostridia;Clostridiales;Lachnospiraceae;unclassified Lachnospiraceae;unclassified Lachnospiraceae	0.049551	-0.00758764	0.174508	-0.00577348	-0.166514	-0.0322895	0.10809	0.0535752	0.0312318	-0.0849539	-0.0579716	-0.0631943	0.0520612	0.0915788	-0.0478482	-0.0642287	-0.132006	0.0315275	-0.00155001	-0.0159155	0.0607015	0.151805	-0.0658471	0.101444	-0.0275321	0.102624	-0.0618217	0.0183181	0.0628269	-0.0482857	-0.0561777	-0.0789345	-0.0229467	-0.15716	0.119161	-0.0145996	0.0343872	-0.0906314	-0.0449544	0.00667728	-0.0654577	-0.0124153	0.0635999	0.0734251	0.010659	0.0209561
TaxonAdjustedID.MGS.down.10000000.v6.174	CAG00563	MGS	Bacteria;Firmicutes;Clostridia;Clostridiales;unclassified Clostridiales;unclassified Clostridiales;Clostridium sp. CAG:91 & sp. 2789STDY5834873	-0.00508127	-0.083597	0.021342	-0.0419895	0.0218677	0.0754862	0.0804738	-0.033226	-0.00578488	0.0111127	-0.000875147	0.0720513	-0.00893157	-0.095613	0.0325262	-0.10962	0.0635544	0.0573145	-0.00288941	-0.0279184	0.0513926	0.0784952	-0.0211161	-0.0751764	-0.0512929	0.0421698	-0.026023	-0.0611198	-0.0101021	-0.128493	0.00298221	0.0340164	-0.0477433	0.0252349	-0.0629639	-0.0163269	-0.0164379	0.124619	-0.0272206	-0.141348	0.11468	0.123573	-0.00115516	-0.00935021	-0.0148317	-0.0418959
TaxonAdjustedID.MGS.down.10000000.v6.1746	CAG01709	MGS	Bacteria;Bacteroidetes;Bacteroidia;Bacteroidales;Prevotellaceae;Prevotella;unclassified Prevotella	-0.0273818	0.168809	0.146776	-0.0273141	-0.117078	-0.0300218	0.0182198	0.0557925	0.0630017	-0.0633166	0.00986449	0.0202987	0.00781848	0.0816301	-0.0599439	-0.0228269	0.018198	0.0020661	0.0181569	0.0262831	0.05495	0.00493856	-0.00938458	-0.0756852	0.0473647	-0.0248719	0.0666749	-0.0276968	0.0835904	-0.0626426	0.00210707	-0.0568561	-0.00197015	-0.0613164	0.115954	0.0288327	0.0418499	-0.108141	0.0800532	0.0497256	-0.0571682	-0.0242775	-0.0267976	0.00324351	0.10422	-0.129684
TaxonAdjustedID.MGS.down.10000000.v6.1752	CAG50007	MGS	unclassified;unclassified;unclassified;unclassified;unclassified;unclassified;unclassified	-0.0157233	0.0407862	0.0888805	0.0495257	-0.138481	0.01083	-0.0333597	0.0356766	0.113431	-0.122903	-0.104166	-0.0552736	0.13637	0.0214774	-0.00923058	0.00632873	-0.0641234	0.0448493	-0.0861333	-0.0196026	0.0437292	-0.00334278	0.00772129	-0.0520603	-0.00346655	-0.0337899	0.0490306	-0.0655267	0.0222693	0.00649213	-0.0339996	-0.0449077	0.0253981	-0.0569463	0.00221306	0.0564638	-0.0150122	-0.0100368	-0.154896	0.0211619	-0.0260523	-0.0907665	-0.000292838	0.0526298	-0.0461553	0.00255923
TaxonAdjustedID.MGS.down.10000000.v6.1754	CAG01715	MGS	unclassified;unclassified;unclassified;unclassified;unclassified;unclassified;unclassified	-0.130696	-0.0947668	-0.105234	0.0265767	0.0767877	0.00311209	-0.0510433	-0.0820298	0.0775337	-0.0139837	-0.00101401	-0.0526059	0.0577553	0.0403775	-0.000477454	0.0570981	0.0570362	0.0483447	0.105543	-0.0654539	0.0110749	-0.0635788	0.0025387	-0.0398214	0.0198966	-0.00973136	-0.0176439	0.0175475	-0.0467653	0.0571646	0.0448885	-0.0287644	0.151297	0.122875	-0.0741499	0.0737082	0.0234588	0.0369957	-0.170487	0.0631401	0.0464638	-0.0567391	-0.0376487	0.0366278	-0.0665807	0.110513
TaxonAdjustedID.MGS.down.10000000.v6.1769	CAG01730	MGS	Bacteria;Bacteroidetes;Bacteroidia;Bacteroidales;Tannerellaceae;Parabacteroides;Parabacteroides distasonis	-0.0703953	0.0126925	0.0171695	0.00993056	-0.0271229	-0.0317237	-0.11196	-0.131129	-0.0767314	-0.0365318	-0.0530867	-0.103373	0.0747257	-0.0549913	-0.0899302	-0.0137842	-0.0435659	-0.0205923	0.105087	-0.0410731	-0.0819705	0.0773751	0.0586661	-0.0127597	-0.153443	0.0142559	-0.0555944	-0.0237834	0.0373492	0.0121607	-0.014419	0.00909081	0.15983	0.0174673	-0.0588372	0.0418835	-0.0830986	0.0179768	-0.0279399	-0.0141838	0.0212906	-0.0499661	-0.00187871	-0.0270417	-0.00502496	0.0682646
TaxonAdjustedID.MGS.down.10000000.v6.1784	CAG01745	MGS	Bacteria;Proteobacteria;Gammaproteobacteria;Enterobacterales;Enterobacteriaceae;Escherichia;Escherichia coli	-0.00945136	-0.04445	0.0638344	-0.0986835	0.0378805	0.0910986	-0.0105281	0.055304	0.174639	0.0252301	-0.0680022	-0.0234403	0.0659366	0.070869	-0.048833	-0.131232	0.142721	0.0625694	0.0579024	0.117107	0.119226	0.0505175	0.103865	0.00972365	0.119642	0.0529128	0.143463	0.264026	0.129056	0.0689894	0.0696675	-0.0317635	0.0130565	0.0639976	0.0784089	-0.053531	-0.0193205	0.0857069	-0.0126477	-0.0039657	0.0323667	0.162694	0.00986022	0.0628398	-0.0708482	0.00542187
TaxonAdjustedID.MGS.down.10000000.v6.1810	CAG01770	MGS	Bacteria;Firmicutes;Clostridia;Clostridiales;Clostridiaceae;Hungatella;Hungatella hathewayi 2	0.094353	-0.0915886	-0.1069	0.0184148	0.0867828	-0.144282	-0.123544	-0.125597	-0.126278	0.0167922	-0.0698005	-0.0600117	-0.0200169	-0.154739	-0.083536	0.0197073	-0.0599263	0.00767847	-0.0590952	0.0301838	-0.150779	0.0182029	-0.0106647	-0.0080907	-0.0958671	-0.1063	-0.115132	0.0703911	0.0158805	-0.0128337	-0.0401406	0.0927119	-0.0407596	-0.0312685	-0.200994	-0.0276937	-0.0208286	-0.0129554	0.0229783	-0.0162537	-0.0179107	0.0372927	-0.159554	-0.126717	-0.054077	-0.0849121
TaxonAdjustedID.MGS.down.10000000.v6.1816	CAG01775	MGS	Bacteria;Firmicutes;Clostridia;Clostridiales;unclassified Clostridiales;unclassified Clostridiales;unclassified Clostridiales	0.0977761	0.000877886	0.0204644	0.162621	-0.186577	0.0146046	0.0907615	0.0730961	0.0284087	-0.111587	-0.0348556	0.00562759	0.165284	-0.0145208	-0.0578201	-0.00817565	-0.0747458	0.20815	0.00963031	-0.0939536	0.0874052	-0.0464518	0.0491315	0.0618383	-0.0916735	0.0680654	-0.0765576	0.00292393	0.0175097	-0.114637	-0.0229457	0.027938	-0.0202443	-0.0736479	-0.00345999	0.0636731	-0.106637	-0.0313695	-0.0740387	0.0956952	-0.0880316	-0.0206909	0.0629902	-0.097714	0.126093	0.102156
TaxonAdjustedID.MGS.down.10000000.v6.1817	CAG01776	MGS	Bacteria;Verrucomicrobia;unclassified Verrucomicrobia;unclassified Verrucomicrobia;unclassified Verrucomicrobia;unclassified Verrucomicrobia;unclassified Verrucomicrobia	0.0821889	-0.0125229	0.100201	0.0152601	-0.114613	0.0972256	0.119139	0.0942896	0.0562926	0.0782967	0.0676733	0.104117	-0.0103678	0.10641	0.0571671	0.00775937	0.0202715	0.0484028	0.165308	-0.0549154	0.129682	-0.00984523	0.0948048	-0.0169958	0.103998	0.148248	0.0659917	-0.119848	0.0661503	0.0420581	0.0552787	-0.00828079	-0.0666464	0.0459301	0.0392467	0.0507455	0.053297	-0.0477812	0.0187114	0.0174332	-0.0940452	0.055312	0.0907711	-0.0294535	0.106132	0.0638049
TaxonAdjustedID.MGS.down.10000000.v6.182	CAG00175	MGS	Bacteria;Bacteroidetes;Bacteroidia;Bacteroidales;Bacteroidaceae;Bacteroides;Bacteroides clarus	-0.106306	-0.0325467	0.0879678	-0.0585621	-0.0270076	-0.160894	0.0595231	0.0398154	0.0890265	-0.0219508	0.0340196	-0.0907182	-0.0483725	0.0131906	-0.00743538	-0.15131	-0.0943719	0.0650139	0.0604312	0.0694002	0.0163588	0.128544	-0.111266	-0.0505037	-0.0689228	0.0162884	0.0652843	0.0643992	0.0292003	-0.0921953	0.0408518	-0.0956896	0.0652632	-0.0899863	0.0661572	-0.00517778	0.0236412	-0.0049192	0.0478988	-0.0759605	-0.138346	0.128519	0.0238048	0.0868699	0.0106535	-0.0740033
TaxonAdjustedID.MGS.down.10000000.v6.1821	CAG01780	MGS	Bacteria;Firmicutes;Clostridia;Clostridiales;unclassified Clostridiales;unclassified Clostridiales;butyrate-producing bacterium SS3/4 - Clostridium sp. CAG:81	-0.136669	-0.026921	0.00879369	-0.141953	0.136526	-0.0712681	-0.0143903	0.0125586	-0.0381385	-0.114534	0.000617248	-0.0676319	-0.0306049	0.00730099	0.0220153	-0.0868438	-0.0796558	-0.0967052	-0.0156701	0.088593	-0.00748979	0.125058	-0.0222084	-0.0301227	-0.0818524	-0.0552161	-0.0904375	0.0444273	-0.0381041	-0.112191	-0.00996391	-0.0826867	-0.0532481	-0.0241892	0.0809906	-0.104533	0.0337394	-0.012741	0.030983	-0.177335	0.0298905	-0.0230084	-0.0971856	0.06605	-0.066001	-0.162796
TaxonAdjustedID.MGS.down.10000000.v6.1830	CAG01789	MGS	Bacteria;Firmicutes;Clostridia;Clostridiales;Lachnospiraceae;Eisenbergiella;Eisenbergiella tayi	0.0275082	-0.172142	0.0153019	0.0016563	-0.0168132	0.041497	-0.00190036	-0.0235316	0.0253497	0.0454864	-0.0178022	0.0437047	-0.0297346	0.0194929	0.0533829	0.00667063	-0.0230588	0.0446425	0.0479144	0.0588119	0.0205698	0.0276587	-0.012098	-0.0121655	0.0489461	-0.0592697	-0.0513477	0.0990117	0.0827612	-0.0363389	-0.00618139	0.029347	0.0909033	-0.0373324	-0.0587061	0.00815408	-0.0171435	0.0924055	0.062077	0.0681601	-0.0275647	0.0636859	-0.0222625	-0.0046682	-0.0212431	-0.0194415
TaxonAdjustedID.MGS.down.10000000.v6.1839	CAG01799	MGS	Bacteria;Bacteroidetes;Bacteroidia;Bacteroidales;Barnesiellaceae;Coprobacter;Coprobacter fastidiosus	-0.0948271	-0.0632904	0.0252735	-0.100556	0.0778957	0.016663	-0.0715121	-0.0064411	0.0232824	0.000131677	-0.069273	-0.0514435	0.03451	0.0713629	0.00795022	-0.0181296	0.128366	0.00219145	-0.0573723	0.0354929	0.0227379	0.0315889	0.0449846	-0.00956401	0.0161332	0.102166	0.0394414	0.13947	0.110649	0.107678	-0.0188634	-0.0759146	0.229278	0.105845	0.085777	-0.0608416	0.0127399	0.0442728	0.0758832	-0.0822786	-0.00411222	0.0669202	0.0120614	0.0695831	-0.0540553	0.126646
TaxonAdjustedID.MGS.down.10000000.v6.1842	CAG01802	MGS	Bacteria;Bacteroidetes;Bacteroidia;Bacteroidales;Bacteroidaceae;Bacteroides;Bacteroides ovatus	-0.0974321	-0.0955311	-0.0723658	-0.0497158	0.122358	0.00479048	0.0323566	-0.0413622	0.0420706	0.00741241	-0.0334709	0.010361	0.0632004	0.0124281	0.0252945	-0.0480221	0.0221469	-0.0158893	-0.051583	0.0171445	-0.0635085	-0.020227	0.0338121	0.00324857	-0.100608	0.0665267	-0.140825	0.0539147	-0.0561631	0.0738451	0.121311	-0.0560713	0.030353	-0.0519488	0.00822861	-0.133165	0.0595885	-0.0102398	-0.0746428	-0.0716036	0.0976254	0.0785061	0.0962419	-0.0365887	0.0101674	-0.0226663
TaxonAdjustedID.MGS.down.10000000.v6.1852	CAG01811	MGS	Bacteria;Bacteroidetes;Bacteroidia;Bacteroidales;Rikenellaceae;Alistipes;Alistipes finegoldii	0.107718	-0.0418799	0.0291209	0.0656439	-0.0959248	-0.0857071	-0.155392	-0.117733	-0.102176	-0.187086	-0.00370119	-0.009678	-0.015429	-0.019223	-0.0745642	-0.00671888	0.00886716	0.118688	0.0283062	0.00109344	-0.188337	-0.00140476	-0.0588662	-0.0593924	-0.0475241	0.0056727	-0.027139	-0.087871	0.0636222	-0.128087	-0.07055	0.00262614	0.0262981	-0.0684633	-0.0637144	-0.0252746	-0.0332009	-0.0381445	-0.0531475	-0.0110207	0.00452111	-0.0349785	-0.114316	-0.0468536	0.0275912	-0.0276682
TaxonAdjustedID.MGS.down.10000000.v6.1853	CAG01812	MGS	NA	0.0356816	0.0165554	0.0342186	-0.0618177	0.029429	0.0483543	0.0524282	0.142011	0.0435773	-0.0429142	-0.0687553	0.121283	0.0228449	0.0649963	-0.00662098	-0.124837	0.0298252	-0.0250829	-0.0442242	0.0521343	0.160095	0.0781389	0.0541057	-0.038634	0.0978809	0.0831088	-0.0270934	0.137788	-0.0304865	-0.0985123	0.021458	-0.0203382	0.00672949	-0.0614361	0.0883038	0.000784868	-0.0390531	0.00243434	0.0943359	-0.0802302	-0.0406949	0.015224	0.0930564	-0.0313452	-0.00662632	0.0271838
TaxonAdjustedID.MGS.down.10000000.v6.1855	CAG01814	MGS	NA	-0.0596931	0.13303	0.107454	-0.0672465	-0.0373762	0.0175387	-0.111186	-0.0399317	0.00859109	-0.0800477	0.0619502	-0.0132262	-0.0279254	0.230561	0.0537559	-0.036691	0.0925262	-0.00648285	0.0537605	-0.0100757	-0.0537047	0.0571624	-0.00198981	-0.131013	-0.0149559	-0.0829556	0.0318317	-0.0729746	0.0818952	0.068451	0.0678539	0.0497939	-0.0490365	0.0435315	0.0530178	0.00685671	0.102663	0.120792	-0.0708294	-0.0399793	0.0630604	0.10555	-0.11098	0.03962	-0.0718212	-0.0247918
TaxonAdjustedID.MGS.down.10000000.v6.1857	CAG01816	MGS	NA	0.0169819	0.0213345	-0.0358452	-0.0313877	0.0675253	0.0665884	0.0991004	0.130547	0.0350944	0.0212515	-0.0349713	0.00586477	0.065018	0.0238506	0.0929327	-0.0346086	0.00281614	-0.0368439	-0.075395	0.0644983	0.128946	-0.114511	0.0292629	0.0585966	0.0566731	-0.046393	-0.0638941	0.0753909	-0.125646	-0.0394592	0.0268683	0.018152	0.0448524	0.0409625	0.0751817	0.0323806	0.0666434	-0.00822956	-0.0135815	-0.0267302	0.00984734	0.0827226	0.170615	-0.00108747	-0.0255992	0.0606886
TaxonAdjustedID.MGS.down.10000000.v6.186	CAG00178	MGS	Bacteria;Firmicutes;Clostridia;Clostridiales;Eubacteriaceae;Eubacterium;Eubacterium sp. CAG:38	-0.0499033	-0.0399469	0.0668062	-0.158421	0.0960545	-0.0786736	0.0309841	0.0408899	-0.0252732	-0.0488216	-0.0605688	0.0429599	-0.127535	0.00985583	0.0434434	-0.0603779	0.00726177	-0.152736	-0.109738	0.0885731	0.0207096	0.047328	-0.0809543	-0.0886085	0.0159176	0.0213446	0.00657392	-0.0284327	-0.0221979	-0.177315	-0.00757135	-0.151557	-0.00309786	-0.044944	0.0842293	-0.126549	-0.00826668	-0.049545	-0.0952286	-0.178649	-0.0847117	0.0647945	-0.00982203	-0.04114	-0.0887639	0.00403393
TaxonAdjustedID.MGS.down.10000000.v6.1863	CAG01822	MGS	NA	-0.0167294	-0.0137046	0.142663	-0.0572646	-0.0823753	-0.00921664	-0.027843	0.0193932	0.0282056	-0.0815123	-0.0398694	-0.0368159	-0.0467406	0.0651822	0.0037544	-0.0910718	0.0236502	-0.00281413	-0.0247019	0.0213528	0.0535101	0.133134	-0.0230938	-0.058481	-0.0349451	0.0592548	-0.0270424	0.00114873	0.104891	0.0689342	-0.00158259	0.00116653	0.141228	0.0105564	0.0543643	0.0161041	-0.0276424	0.0477145	0.0702104	-0.0945138	-0.102673	-0.0128024	0.031757	0.104164	-0.00353207	-0.10849
TaxonAdjustedID.MGS.down.10000000.v6.1868	CAG01827	MGS	NA	0.0403706	0.0821159	0.0893103	0.0372262	-0.126323	0.024792	0.0566486	0.139048	0.0215403	-0.0775894	-0.0580596	0.0424245	0.162327	-0.0160826	0.0119923	-0.0741891	-0.000428438	-0.016003	-0.0656754	-0.0614672	0.0764987	0.0536926	0.0486462	-0.023279	-0.0753001	0.0593471	-0.0502705	-0.0390125	0.00928235	0.061229	-0.0384979	-0.0533501	-0.0139397	-0.00728634	0.0898447	0.00640212	-0.0889918	0.0556155	0.0624205	-0.113707	-0.111558	-0.0672491	0.0496682	0.0119945	0.000811292	-0.0871476
TaxonAdjustedID.MGS.down.10000000.v6.1869	CAG01828	MGS	NA	0.122778	-0.0160273	0.134322	0.169128	-0.305729	0.193255	0.212307	0.167082	0.101069	-0.110925	-0.0206003	0.139331	0.174726	0.123231	0.0259939	0.0617887	-0.0478729	0.0751733	0.0821986	-0.031172	0.113721	0.0678014	0.0648374	0.0825355	-0.101025	0.145525	-0.0461684	0.0573959	0.073301	-0.035786	-0.0399449	-0.00149146	0.0770495	-0.0555299	0.062245	0.0703715	0.150682	-0.104152	0.0887397	0.061957	-0.0830625	-0.019964	0.215708	0.0917322	0.0767902	0.169103
TaxonAdjustedID.MGS.down.10000000.v6.187	CAG00179	MGS	Bacteria;Firmicutes;Clostridia;Clostridiales;Lachnospiraceae;Blautia;Blautia sp. CAG:237	0.0509193	-0.0571246	0.130304	-0.0932725	-0.0333295	-0.0740293	0.0902021	0.129444	-0.06442	-0.149366	-0.0876465	-0.0632551	-0.0501796	-0.0282243	-0.00156135	-0.0824563	-0.0583968	-0.0662955	-0.031502	0.0316691	0.126889	0.0472364	-0.0347925	0.0767429	0.0540066	-0.00198394	-0.0811847	0.0396056	0.00195274	-0.108184	0.0768533	-0.14776	-0.0690871	-0.0796821	0.0625632	-0.163716	0.020159	-0.0894048	-0.0588696	-0.117143	-0.073782	0.066774	0.0934055	0.0582038	-0.0581327	-0.0380505
TaxonAdjustedID.MGS.down.10000000.v6.1870	CAG01829	MGS	NA	-0.0560318	0.0711418	0.0110104	-0.0724842	0.0632712	-0.0358929	-0.0671764	-0.0667929	-0.0141587	0.0387252	0.045733	0.0757165	-0.102068	0.0309361	0.0321036	0.00946685	-0.037961	-0.18216	-0.0366191	0.0821452	-0.100926	0.016373	0.00749647	-0.144428	-0.0882978	-0.121232	0.0121346	-0.0684998	0.0184769	0.147845	0.139989	0.04868	-0.0813207	0.0539137	0.00637342	-0.0831174	0.0260885	0.072628	-0.00603856	-0.0311078	0.0611621	-0.0486034	-0.039247	0.00430906	-0.0276067	-0.17154
TaxonAdjustedID.MGS.down.10000000.v6.1876	CAG01835	MGS	NA	0.0120656	-0.0232224	0.13618	-0.0303731	-0.10348	-0.00839006	0.0891479	0.0528022	0.0149695	-0.0269332	-0.0524963	0.0718097	-0.0299691	0.132625	-0.0747009	0.0274804	0.0565512	-0.0707249	-0.107266	0.0105636	0.0388105	-0.0304136	-0.124847	-0.0407859	0.082112	0.0208293	0.0445778	0.0593642	0.060224	-0.0426679	0.0595902	-0.0655013	0.0339694	-0.0147864	0.0990073	-0.0150654	0.0659563	-0.152122	0.0518665	-0.0808694	0.0206819	0.0504878	0.116789	-0.0943519	-0.00067084	0.0352054
TaxonAdjustedID.MGS.down.10000000.v6.1878	CAG00006_5	MGS	NA	0.134781	-0.178205	-0.0477663	0.111537	-0.0669047	-0.0572092	-0.178073	-0.150722	0.00721578	0.00892594	-0.0181463	-0.0490533	0.00802237	-0.0657279	-0.124234	0.0272938	-0.0253315	0.122164	0.079711	-0.0510978	-0.188385	0.024215	0.0116756	-0.167046	-0.0507637	0.031668	-0.0718535	-0.0123643	0.0346328	-0.0310558	-0.00142541	0.0310147	0.18936	0.0380724	-0.0440054	0.0971784	-0.057743	0.0124847	0.0529757	-0.0351496	-0.090428	0.0259852	-0.029424	-0.00334577	0.0644841	0.0664334
TaxonAdjustedID.MGS.down.10000000.v6.1904	CAG01862	MGS	NA	-0.0095588	-0.114138	0.0701067	-0.278702	0.215838	-0.118567	-0.156238	-0.108472	-0.105559	0.0629938	-0.031916	-0.140803	-0.111733	-0.135566	-0.113123	-0.031242	0.0735648	-0.106731	-0.0913072	0.153942	-0.0661117	0.0786808	0.0212795	-0.0685288	-0.0345494	-0.107736	0.00156447	0.0149591	0.0213717	-0.0920179	0.0889331	-0.0268002	-0.026936	0.0816507	-0.0299273	-0.119811	-0.0775325	-0.00475275	-0.0188055	-0.145321	0.067642	-0.0689819	-0.167424	0.0747138	-0.121388	0.0721096
TaxonAdjustedID.MGS.down.10000000.v6.191	CAG00183	MGS	Bacteria;Firmicutes;Clostridia;Clostridiales;Lachnospiraceae;Blautia;Ruminococcus sp. CAG:60 / Blautia sp. 2789STDY5608836	-0.0700147	-0.0357934	0.123895	-0.0702811	-0.0505162	-0.0831084	0.061811	0.0971821	0.0276285	0.0280364	-0.0338389	-0.0645916	-0.0484461	0.0259686	-0.0477731	-0.130046	-0.103173	0.0160837	0.0282911	0.0083123	0.0191993	0.164124	-0.0275022	0.0691414	-0.0647898	-0.0139591	-0.0204921	-0.000547738	-0.0210944	-0.0213246	-0.0519925	-0.0994911	-0.00860835	-0.0614179	0.107609	-0.107508	-0.0499124	-0.0223783	0.0425448	-0.130419	-0.112826	-0.0908661	0.0249865	-0.0183638	-0.0268957	-0.130581
TaxonAdjustedID.MGS.down.10000000.v6.1931	CAG01889	MGS	NA	-0.121648	-0.189906	-0.0266834	-0.152532	0.182401	-0.197745	-0.170796	-0.135324	-0.0761676	-0.00275038	-0.145002	-0.105346	-0.149468	-0.0587248	-0.133691	-0.12641	-0.0185618	-0.0327462	-0.096815	0.122846	-0.150623	0.0707591	-0.0551434	-0.174947	-0.075664	-0.0485297	-0.0561763	0.012869	-0.00909406	-0.0368793	0.0325248	-0.00143191	0.0108276	0.0124516	-0.141255	-0.057615	-0.0336654	0.0253825	-0.104137	-0.0672854	-0.0519299	-0.0389559	-0.140514	0.0300203	-0.0827663	-0.053584
TaxonAdjustedID.MGS.down.10000000.v6.1936	CAG01894	MGS	NA	0.115707	0.177286	-0.00353644	0.250516	-0.252778	0.0801852	-0.0219982	-0.0470645	-0.0127855	-0.104211	0.0565809	0.0166435	0.139009	0.0921864	0.0127334	0.125119	0.0451416	0.115005	0.0766081	-0.17256	-0.0270625	-0.0194211	-0.00678116	-0.0674961	-0.0273878	-0.054619	0.0537103	-0.0402759	0.0179721	0.101375	-0.148828	0.145292	0.00174837	-0.0197386	-0.02789	0.161246	0.120629	0.0519988	0.102591	0.133132	-0.0152836	-0.0355055	0.0221228	-0.0404053	0.126137	-0.0649919
TaxonAdjustedID.MGS.down.10000000.v6.1937	CAG01895	MGS	NA	0.200202	-0.00496151	0.0633635	0.14682	-0.212799	0.0200989	0.104424	0.0842924	0.040483	-0.0457767	-0.030108	0.0343311	0.03695	-0.039598	-0.0176541	-0.047703	-0.0245287	0.0605515	-0.0373858	-0.250791	0.0405782	0.0618722	-0.120952	0.0329409	-0.132019	0.0735037	-0.0920772	-0.0165936	-0.0200491	-0.0826618	-0.0110849	0.0510685	-0.0397671	-0.0837036	0.0342032	0.0295866	0.0724998	-0.0271815	-0.0610927	-0.104564	-0.110067	0.0658749	0.109861	-0.0590543	0.0278496	0.0328446
TaxonAdjustedID.MGS.down.10000000.v6.1939	CAG03382	MGS	NA	0.0703778	-0.019006	0.151328	0.0606608	-0.211573	0.0720384	0.0268607	0.0352985	0.0113513	-0.0853719	-0.0162049	-0.028583	0.0892627	0.119262	-0.0501846	-0.103495	0.0269863	0.079541	0.0422075	-0.104467	0.0134192	0.127783	0.0136266	-0.0202164	-0.0650491	0.0906559	-0.0136645	-0.00697223	0.186174	-0.025954	-0.0583807	0.0146654	0.0212719	-0.0308826	0.0097778	0.0537943	0.00128425	0.0925686	0.0602206	-0.0277791	-0.0627875	-0.00331613	0.0696583	0.0375353	0.0593377	0.0945951
TaxonAdjustedID.MGS.down.10000000.v6.194	CAG00186	MGS	Bacteria;Firmicutes;Bacilli;Lactobacillales;Streptococcaceae;Streptococcus;Streptococcus salivarius	0.0418823	0.0361809	0.0500984	-0.00887575	-0.0404193	0.0377647	-0.0698938	0.0240811	0.0661008	0.0165402	0.0373042	0.0640344	0.0650029	0.0760801	-0.0250145	-0.0685229	0.0481426	-0.00876705	0.0476202	0.0245702	-0.0157602	0.126761	0.0554099	-0.127948	0.00217833	0.0442841	-0.0334903	-0.0733674	0.0671934	0.0764253	-0.022806	0.0500149	0.0325258	0.0616311	0.0863535	0.0449505	-0.0202293	0.058003	0.121864	-0.0505834	0.0580504	-0.0416911	0.00658164	-0.0471793	0.0338299	-0.107051
TaxonAdjustedID.MGS.down.10000000.v6.1942	CAG01898	MGS	NA	0.135159	-0.102254	0.189543	-0.11741	-0.067167	-0.0105968	0.0111217	0.076736	0.185824	-0.00536902	-0.0656892	-0.0415233	-0.0495268	0.0318331	-0.00649255	-0.147844	0.15531	0.0269359	0.0554586	0.0120917	0.0500342	-0.0131958	0.0267983	-0.0594644	0.0438394	0.0601794	0.0987723	0.124994	0.0758179	0.00655098	-0.012489	-0.115451	0.0815534	-0.00922841	0.149515	-0.0418763	0.0253843	0.0555246	0.0313636	-0.0202006	-0.0724431	0.125035	0.11545	0.0779091	-0.0210951	-0.0627084
TaxonAdjustedID.MGS.down.10000000.v6.1945	CAG01901	MGS	NA	-0.0483427	-0.00137432	0.0969103	-0.0641556	-0.0301211	0.0936479	-0.010368	0.0524482	-0.083909	-0.0227811	-0.030503	-0.00248387	-0.0497343	0.0749101	0.155403	0.0160026	-0.0324191	-0.0927473	0.118434	0.021845	0.064666	0.0420562	0.096872	-0.0819269	-0.00446393	0.0663931	-0.0486369	-0.0235447	0.114492	0.0182268	0.078384	-0.0546704	0.0116096	0.0496699	0.0603117	-0.0143662	0.112501	-0.0399431	0.00252418	-0.150531	-0.0008325	-0.0360984	0.0544686	0.0730047	-0.0273429	-0.0100577
TaxonAdjustedID.MGS.down.10000000.v6.195	CAG00187	MGS	Bacteria;Proteobacteria;Betaproteobacteria;Burkholderiales;Sutterellaceae;Sutterella;Sutterella wadsworthensis 1	-0.184532	0.135798	0.0591858	-0.0402771	-0.0172751	-0.0438529	0.0212046	-0.0395637	0.0539768	-0.0241736	0.0226677	-0.00816755	0.0340002	0.107021	-0.159514	-0.0891687	0.0118874	-0.0192461	0.0308428	0.0231669	-0.0220465	0.0361585	-0.0706499	-0.0421455	-0.123875	-0.0672123	0.141177	-0.0173453	-0.0598493	0.0933852	-0.0490789	-0.0262875	-0.043837	-0.121196	0.00629709	-0.0595837	-0.0167341	0.0709953	-0.0350917	0.0574678	0.0449946	0.0687197	0.00103657	-0.00109764	0.0971603	-0.0768235
TaxonAdjustedID.MGS.down.10000000.v6.1953	CAG01909	MGS	NA	0.159582	0.0971073	0.086508	0.11212	-0.20017	0.183162	0.115453	0.0790904	0.131376	0.0129897	0.0471792	0.0858064	0.179066	0.0558081	0.0892307	0.0281136	-0.0103833	0.0605177	-0.0196102	-0.11237	0.130522	-0.001708	-0.00261393	0.097945	0.00429393	0.11974	0.00197591	0.0765279	0.00669769	-0.00924711	-0.00795048	0.0251041	0.00975882	0.0666401	0.0694048	0.127969	-0.065177	0.00405534	-0.0184086	0.0449732	-0.0879583	0.0456478	0.139295	0.00685864	0.101113	0.115284
TaxonAdjustedID.MGS.down.10000000.v6.1955	CAG01912	MGS	NA	-0.0500624	-0.0795939	0.0733789	-0.0545403	-0.0167074	0.0196419	0.172208	0.240038	0.128599	0.00656989	-0.024924	-0.0640281	0.130725	-0.0115096	0.0880927	-0.171038	-0.0028835	0.00691645	-0.00183856	0.0854159	0.262376	0.041272	0.078816	0.0735245	-0.081727	0.0630555	0.000731408	0.00930463	-0.0267294	-0.117427	-0.0747029	-0.087615	-0.0769511	-0.0797154	0.153052	-0.0990188	-0.000206635	-0.070124	-0.0155449	-0.106597	-0.0778731	0.104542	0.168464	0.0247264	0.011504	0.0438995
TaxonAdjustedID.MGS.down.10000000.v6.196	CAG00188	MGS	Bacteria;Proteobacteria;Alphaproteobacteria;Rhodospirillales;Acetobacteraceae;Acetobacter;Acetobacter sp. 46_36 & CAG:267	-0.0883189	-0.0454082	-0.0242333	0.0958457	-0.0741048	-0.0575351	0.00703043	0.00496322	0.00368004	-0.0759617	-0.0533894	-0.0673987	0.021202	0.00506425	-0.110366	-0.0349242	-0.0742766	0.100732	0.010702	-0.0465677	-0.0445271	0.0205913	-0.0748313	-0.0679617	-0.175346	0.0698162	-0.0694477	-0.0118459	-0.0417345	-0.0637525	0.00658445	-0.0438755	0.0599311	-0.0424426	-0.0108323	-0.000646481	-0.0353212	-0.0492976	0.03289	-0.00727909	-0.0581035	-0.031427	0.0513101	-0.0372748	0.0265264	-0.0183634
TaxonAdjustedID.MGS.down.10000000.v6.197	CAG00189	MGS	Bacteria;Firmicutes;Clostridia;Clostridiales;Lachnospiraceae;Roseburia;Roseburia sp. CAG:100	-0.0151918	-0.00839279	0.0917245	-0.0161784	-0.074077	-0.0300878	-0.00669807	0.0476878	-0.0170223	-0.0816778	-0.026714	-0.0997197	0.0208415	-0.0138379	-0.010951	-0.119641	-0.0644028	-0.0506152	0.00144824	0.0981072	0.0487078	-0.0168585	-0.0823257	-0.00855642	-0.0525213	-0.141735	-0.00410997	-0.0186904	-0.000261039	-0.0259476	0.0038439	-0.0717802	0.00671373	-0.0279975	0.0224523	0.0385068	-0.0311834	-0.123826	0.0738897	-0.0534447	-0.0981515	-0.00803722	0.0633627	-0.00461906	0.0637549	0.0208221
TaxonAdjustedID.MGS.down.10000000.v6.1972	CAG01928	MGS	NA	-0.0830862	0.0504526	0.122633	-0.0958307	-0.0231327	-0.0048089	-0.00110696	0.0167217	0.0692867	-0.0156249	-0.0772782	-0.00400331	0.0128726	0.0754536	0.0452064	-0.0654007	0.00962878	-0.0508946	0.0482584	0.0326568	0.0407515	0.093624	-0.0726621	-0.0089344	0.0562216	0.0309072	0.033054	0.0322991	0.0648674	-0.00241913	0.0637708	-0.108143	0.0977156	0.0115297	0.0833968	0.02673	0.0775254	-0.00776215	-0.0253122	-0.0158549	0.018007	0.0300581	0.0554114	0.190412	-0.0778845	0.0998283
TaxonAdjustedID.MGS.down.10000000.v6.1978	CAG01934	MGS	NA	-0.0444575	0.0660672	0.136037	-0.13096	-0.000439885	0.00451761	-0.0917853	0.0749265	0.00778542	-0.00409003	-0.0344895	-0.0446294	-0.108689	0.109631	0.103314	-0.129769	-0.0283391	-0.0829014	0.0393659	0.0664193	0.0674116	0.0518422	0.131932	-0.146274	0.0120105	0.0921393	0.0441297	0.0610222	0.0936486	0.0215576	0.0476867	-0.0824162	-0.0399694	-0.0380181	0.058898	0.00825279	0.0160026	0.0132727	0.00707279	-0.0953923	-0.0384646	0.0463244	0.0578015	0.088026	-0.0422757	-0.0629575
TaxonAdjustedID.MGS.down.10000000.v6.198	CAG00190	MGS	unclassified;unclassified;unclassified;unclassified;unclassified;unclassified;unclassified	0.0614282	0.0921883	0.130476	0.038297	-0.168092	0.064159	-0.0100388	-0.0374041	0.0385093	0.0886492	-0.0344695	0.0190887	0.093549	0.100841	0.0614067	-0.0161305	0.00873931	0.0251849	0.168892	0.0391536	-0.00735235	0.103977	-0.0238243	-0.106925	0.0239261	0.0117911	0.074456	-0.021234	0.152949	-0.0376253	-0.0245897	-0.0208213	0.0588376	-0.00796829	0.0719998	0.0682337	-0.0558395	-0.0503061	0.123668	0.0472032	-0.00733861	0.0481246	0.0189068	0.0714447	0.0995942	-0.0241286
TaxonAdjustedID.MGS.down.10000000.v6.1980	CAG02292	MGS	NA	0.0784821	-0.0685414	-0.233157	0.323722	-0.100793	0.0283512	0.0655771	-0.0552071	-0.000101483	0.0640053	0.0173882	-0.0552434	0.185052	-0.116979	-0.123495	0.00342708	-0.128549	0.266691	0.140723	-0.170217	-0.0582478	0.0217912	0.0474059	0.0829582	-0.047789	0.0967935	0.0284277	-0.0365392	-0.0348427	0.0345314	-0.0632999	0.121506	-0.0072911	-0.111848	-0.193252	0.115076	-0.0903222	0.0196645	0.071403	0.0413378	-0.0661538	-0.0254709	0.0828714	-0.0573792	0.216128	0.0598165
TaxonAdjustedID.MGS.down.10000000.v6.1986	CAG01941	MGS	NA	0.13405	0.121473	0.0437255	-0.0847334	0.043478	-0.0503916	0.0356374	0.0668281	0.0315851	0.0493623	-0.067272	-0.0189547	-0.0573852	-0.0122777	0.0494732	-0.078865	-0.0196773	-0.0631471	0.035418	-0.0591472	0.0543889	0.0239396	0.100795	0.0386952	0.0479534	0.00556511	0.0359726	-0.183247	-0.0971924	-0.0123664	0.0140393	-0.127607	-0.0755188	-0.0723237	0.095786	-0.151672	-0.103645	-0.103001	0.00650261	-0.0634	-0.0444098	-0.0787815	0.0683261	-0.0453243	0.0207784	-0.0154246
TaxonAdjustedID.MGS.down.10000000.v6.1987	CAG01942	MGS	NA	-0.0215489	-0.0182792	0.00584227	0.0794083	-0.0870054	0.0577706	0.103349	0.0139267	0.111283	-0.0280077	0.0216525	-0.0512697	0.12722	-0.0543628	0.0648324	0.0523438	-0.108728	0.0966192	0.088565	-0.0739789	0.00234528	0.0842513	0.0297323	0.0747251	-0.0397164	0.122668	0.023575	0.0862524	-0.0381566	-0.0790431	0.0329557	-0.0175526	-0.0233717	-0.156478	0.0886826	-0.0167937	0.0191083	-0.0537469	0.10714	0.0544444	0.0373903	0.0333775	0.112213	-0.0606216	0.122198	-0.00319025
TaxonAdjustedID.MGS.down.10000000.v6.1988	CAG01943	MGS	NA	0.0260381	0.11179	-0.0894572	-0.0482614	0.137757	-0.0302495	-0.0414912	-0.0556326	0.0344314	0.0305079	0.0339977	-0.0375545	0.0156677	0.0407204	0.0869682	-0.00108108	0.00733536	-0.0832302	-0.0547818	-0.0326167	0.0658965	0.0740815	-0.0697495	-0.164521	0.106449	0.021327	0.0196978	0.0561237	-0.0184652	-0.0453873	0.0964493	0.0390775	-0.00610823	0.128652	-0.049241	-0.021881	-0.0137257	-0.0372154	-0.0793645	0.0715036	0.0126259	0.0412569	-0.0040221	-0.0288915	0.0282323	0.0149384
TaxonAdjustedID.MGS.down.10000000.v6.1994	CAG01949	MGS	NA	0.0816699	-0.0933502	-0.0557381	0.084872	-0.031751	-0.0550584	0.045356	0.0353385	0.0172443	-0.056284	0.0386916	-0.0329074	0.0899202	-0.0280491	-0.0441761	0.0366298	-0.0377703	0.0846872	0.0582396	-0.0440956	0.0678422	-0.0521004	0.0347958	0.00747832	-0.0340713	0.0742289	-0.0429013	0.123997	-0.0222745	-0.0330315	-0.0788065	-0.0215621	-0.0530297	-0.072414	-0.0289201	0.0533372	-0.057466	-0.1026	0.0123601	0.0246181	-0.0745544	0.059956	0.0408318	0.00996429	0.106095	0.0878422
TaxonAdjustedID.MGS.down.10000000.v6.1995	CAG01950	MGS	NA	0.148129	0.0185286	0.0296333	0.153415	-0.186219	0.151986	0.166802	0.0870948	0.0819293	-0.0369499	0.0621219	0.0972831	0.136127	0.11403	0.0486722	0.00791439	-0.0568319	0.123693	0.0752947	-0.0683091	0.102133	-0.0415174	0.0580475	0.0473392	-0.0538102	0.137462	-0.00572065	0.0215192	0.0314653	-0.000123743	0.00343815	0.0933707	0.00823068	-0.0696436	0.0274589	0.0690763	0.105163	-0.0356621	-0.0311983	0.102924	-0.0669553	0.0903663	0.156948	-0.059127	0.139871	0.143862
TaxonAdjustedID.MGS.down.10000000.v6.1997	CAG01952	MGS	NA	-0.0352216	0.120939	0.0478931	-0.00593351	-0.0412503	0.0242244	-0.0584273	-0.07009	-0.00822696	0.061055	0.0850778	0.0344351	0.0447813	0.102757	-0.0120388	-0.0295336	0.0315712	-0.0195428	0.0748853	0.00705961	-0.012957	-0.00186878	0.0473452	-0.123423	-0.0346859	0.0215948	0.0394771	-0.11793	0.0113725	0.017305	-0.00743426	0.0278782	0.0878874	0.0815375	-0.020794	0.0622525	0.0553714	0.0293267	-0.0341655	0.0578128	0.0321019	-0.0835346	0.028539	0.0158197	0.0358108	0.00482548
TaxonAdjustedID.MGS.down.10000000.v6.1999	CAG01954	MGS	NA	0.0664235	-0.0732437	0.0449067	-0.0481778	0.00491538	-0.0446931	-0.13457	-0.0846839	-0.0265705	0.091754	-0.0812776	-0.0455385	-0.158713	0.0263264	-0.0350936	0.00378653	0.0599144	-0.0156517	0.0528136	-0.0215587	-0.051743	0.0405675	0.0353356	-0.162193	0.0609009	-0.00363924	-0.113774	-0.036146	0.111247	-0.0167264	0.0241368	0.0304677	-0.00569449	0.026463	0.00783711	-0.0847355	0.0180113	0.0557389	-0.0197332	-0.0309367	0.0440772	-0.040904	-0.0309451	-0.0417613	-0.0995956	-0.0600365
TaxonAdjustedID.MGS.down.10000000.v6.20	CAG01028	MGS	Bacteria;Firmicutes;Clostridia;Clostridiales;Oscillospiraceae;Oscillibacter;Oscillibacter sp. ER4 / Firmicutes bacterium CAG:129_59_24	0.0771727	0.103157	0.00632688	0.0581478	-0.0657352	0.102833	-0.0153109	0.0241074	-0.0224052	-0.0630719	-0.0304349	0.0933987	0.0448389	-0.00414206	0.0730229	0.0103097	-0.0235781	-0.012951	0.0172539	-0.129288	0.0748577	0.0390665	0.0660838	-0.190796	-0.0546888	0.0441851	-0.0365104	-0.1257	0.00148938	-0.125653	0.0155242	0.109122	0.0129436	0.0805972	-0.0810954	0.0325	0.0656847	-0.0451194	0.100373	-0.0621808	0.00638938	-0.0865029	0.0064447	0.0609565	0.0114263	-0.0773743
TaxonAdjustedID.MGS.down.10000000.v6.2005	CAG01960	MGS	NA	0.188668	0.0340561	-0.0361076	0.185606	-0.154195	0.176831	0.220955	0.118264	0.0135987	-0.059179	0.0923537	0.156594	0.124826	0.0100063	0.138922	0.11876	-0.13054	0.0506887	0.063897	-0.113877	0.103763	-0.0562354	0.0119758	0.0952334	-0.0171964	0.0180345	-0.0329398	0.0472251	0.0205032	-0.0612751	-0.0476333	0.0742141	-0.0845635	-0.0447916	0.0676631	0.0325971	0.0362065	-0.126806	0.100624	0.046321	-0.0847414	0.106398	0.169982	-0.0901593	0.191337	0.0170916
TaxonAdjustedID.MGS.down.10000000.v6.2006	CAG01961	MGS	NA	0.010436	0.0626398	0.0133676	0.0562901	-0.0707913	-0.0739434	-0.0998906	-0.0653218	-0.0369522	-0.0662863	0.0516186	-0.0321488	-0.0460416	-0.0368813	0.0139963	0.0126269	-0.0580053	-0.0625404	-0.0622761	-0.0818234	-0.0331672	-0.014931	0.0459916	-0.0298579	-0.00386542	-0.0320837	-0.0462584	-0.0735534	0.0207487	-0.05798	-0.0667847	-0.00370797	0.0887981	0.0372294	-0.0677986	0.0585685	-0.0248578	-0.0722542	0.0212512	-0.0790588	-0.0424763	-0.101252	-0.0644947	-0.0541962	-0.00543823	0.0296347
TaxonAdjustedID.MGS.down.10000000.v6.2014	CAG01968	MGS	NA	0.0333385	0.0485896	0.0159087	-0.0273382	0.012248	-0.00127694	-0.0428848	-0.0166539	-0.0930194	-0.0501833	-0.0093179	-0.002619	-0.0241719	0.0642562	-0.0536922	-0.0919715	-0.0674566	0.0722691	0.0164545	0.033753	-0.0140338	0.0167946	-0.0331868	-0.0223839	0.0867961	0.0325745	0.00368842	-0.040266	-0.0849472	0.00656501	0.0081234	-0.0323636	-0.0196185	0.0157477	-0.0309938	0.026681	-0.00424856	0.0216989	-0.0363837	-0.101112	-0.0421685	0.00278269	-0.0204391	-0.148394	0.0377399	-0.0350711
TaxonAdjustedID.MGS.down.10000000.v6.2016	CAG01970	MGS	NA	-0.078844	-0.0224139	0.113715	-0.194716	0.0868361	-0.149486	0.0603784	0.129864	-0.0609106	-0.0638728	-0.0436857	-0.15721	-0.166257	0.104823	0.0237421	-0.0710535	-0.0965049	-0.0977913	-0.0304075	0.0911315	0.0993612	-0.0607674	-0.0515251	0.047048	0.0315119	-0.0749972	-0.00299327	0.076015	0.0861393	-0.0349776	0.0438114	-0.188607	-0.0727934	-0.221883	0.167938	-0.240013	-0.0622107	-0.0308629	-0.14638	-0.0631066	-0.0355651	0.106775	0.0166873	0.093296	0.014379	-0.0816226
TaxonAdjustedID.MGS.down.10000000.v6.2018	CAG01971	MGS	NA	-0.107852	0.00401319	-0.128952	0.0430784	0.083341	0.117193	0.0361013	0.000801673	-0.0117357	0.0245145	0.050948	0.12104	0.0742247	-0.0412136	0.137528	0.0477296	0.0779897	0.0348883	0.0204935	0.034614	-0.0520119	0.0181498	-0.0129951	0.0188478	0.0235326	0.0386407	-0.00550048	0.0534304	-0.0383336	0.0841636	-0.0445117	0.00655234	0.0164171	0.0445622	-0.115969	-0.0797998	-0.0494791	-0.0922342	-0.110534	0.127608	0.133635	-0.051883	0.0533145	-0.0684087	0.0143352	-0.0311693
TaxonAdjustedID.MGS.down.10000000.v6.202	CAG00194	MGS	Bacteria;Firmicutes;Clostridia;Clostridiales;Eubacteriaceae;Eubacterium;Eubacterium hallii	-0.0548456	-0.0988112	0.0599294	-0.166394	0.111005	-0.00783929	-0.0604155	0.0505711	0.0191384	-0.0279511	-0.0863896	0.0332666	-0.0695362	0.0478931	-0.0154	-0.105857	0.0482646	-0.0826621	0.00743831	0.115108	0.0824235	0.124541	-0.00501573	-0.189048	-0.0439966	-0.083725	0.0275396	0.0612897	0.0525946	0.0143287	0.0372379	0.0236063	-0.0209233	-0.0236428	0.0643595	-0.0977351	-0.0207484	0.0114528	-0.129259	-0.122738	0.0176807	0.019471	-0.0356579	0.120306	-0.0789261	-0.0195584
TaxonAdjustedID.MGS.down.10000000.v6.2030	CAG01983	MGS	NA	-0.0884532	-0.0649645	0.00975406	0.0419753	-0.0525772	0.0309029	0.0726487	0.120952	0.0970771	0.105171	-0.00336201	0.0569495	0.117863	0.0728267	0.0213906	-0.0177162	0.00640501	-0.00297083	0.0291214	-0.0159326	0.0122347	0.0370928	-0.0489402	0.110991	0.0514184	0.0438081	-0.040924	0.0809849	0.144443	0.0490613	-0.00399753	-0.00278181	0.0559387	-0.0684135	0.0973843	-0.00499328	-0.0212804	0.0139231	0.100071	0.0621962	0.0110173	-0.00126377	0.0384041	0.0294737	-0.0649603	0.0382284
TaxonAdjustedID.MGS.down.10000000.v6.2032	CAG01985	MGS	NA	-0.0808162	0.107998	-0.0817755	0.0879808	-0.00920537	0.0392656	-0.0362935	0.0759992	-0.0101369	0.0383326	0.134864	0.0512872	0.105328	0.0154542	-0.0503021	0.128582	0.0305906	-0.0351302	0.00565475	-0.0882	-0.0230496	0.0658045	0.00733492	-0.112441	-0.00690575	-0.0491205	0.0449042	0.0139352	-0.0280392	0.083059	-0.0745463	0.0962931	0.0508135	-0.0545998	0.022465	0.013862	0.0324975	0.0151626	0.0064341	0.081698	0.05503	-0.0871907	-0.0299908	0.0153031	-0.0300277	-0.0707256
TaxonAdjustedID.MGS.down.10000000.v6.2033	CAG01987	MGS	NA	-0.102846	-0.0148053	0.260892	-0.137374	-0.11724	0.0436704	0.0147565	0.143202	0.0838298	0.0438617	-0.044767	0.178227	-0.148948	0.149248	0.0507398	-0.0539468	0.122175	-0.120253	-0.00786255	0.0497754	0.0576813	0.00157248	-0.0687365	-0.145676	0.0214892	0.0433443	0.0701386	-0.0137946	0.138767	0.00635527	0.102691	-0.0555634	0.0346513	-0.039757	0.1008	-0.00645636	0.106536	0.0327117	-0.0857015	-0.0613359	0.00336049	0.00789624	0.0685044	0.0514044	-0.0791723	-0.0357612
TaxonAdjustedID.MGS.down.10000000.v6.2038	CAG01992	MGS	NA	-0.0439114	-0.135779	0.0407068	-0.124005	0.0866348	-0.0646617	-0.0194328	-0.0654485	-0.0302668	-0.0086184	-0.164375	-0.024635	-0.135716	-0.0887314	0.0337657	-0.0758368	-0.0535294	-0.092409	0.119395	0.179875	-0.0210193	0.129496	-0.0309748	-0.134817	-0.0419823	-0.0403078	0.0019066	0.00371858	-0.0101459	-0.111411	0.0741452	-0.0771715	0.00164075	0.034712	-0.0373859	-0.0262918	-0.00484253	-0.0945314	0.0614062	-0.133304	0.0212539	-0.0521755	-0.0441263	0.0342097	0.0171583	-0.0740586
TaxonAdjustedID.MGS.down.10000000.v6.2053	CAG02007	MGS	NA	-0.0513643	-0.0995974	0.0875552	0.00642262	-0.0930779	0.0318019	0.0124544	0.00277226	0.0125025	-0.0998099	-0.0145658	-0.0135209	0.0171448	-0.0403096	-0.0472436	-0.139417	-0.0508104	0.0445033	0.115727	0.0314605	-0.0010344	0.11051	0.0251757	0.0150018	-0.06344	0.0864145	0.0171474	0.00526872	0.0241818	-0.0879192	0.0149395	0.0348792	-0.043657	-0.0718394	-0.0134859	-0.0332725	0.12599	-0.0488308	0.00687305	0.0363384	0.0265693	0.0451615	0.00754836	-0.0237381	0.00100733	0.0857977
TaxonAdjustedID.MGS.down.10000000.v6.2055	CAG02009	MGS	NA	-0.00850705	0.0733989	0.131154	-0.0013882	-0.128164	0.0466657	0.0594951	0.110727	0.080993	-0.0654987	-0.0703281	0.0593169	0.0674139	0.0539325	-0.014851	-0.128708	0.0386423	0.0280326	-0.00117592	-0.104726	0.0876671	0.180991	-0.00960104	-0.0576632	-0.0409193	0.147054	-0.0723595	-0.0804978	0.026137	0.0213988	-0.0301793	-0.0422219	0.0595661	0.0639781	0.110987	0.0109584	-0.0458275	0.0515648	0.0667313	-0.0486544	-0.116428	0.00214503	0.0833156	-0.0360937	0.00624542	-0.0534914
TaxonAdjustedID.MGS.down.10000000.v6.2065	CAG02018	MGS	NA	0.031051	-0.047704	-0.123238	0.13224	-0.0135152	0.183525	0.0223718	-0.000736051	0.0905668	-0.0204165	0.0803759	0.151373	0.0529416	0.068928	0.0393867	0.0771763	-0.00449592	0.0673677	0.0853799	-0.119752	0.00775377	-0.0345175	0.016247	0.0425864	-0.0201519	-0.060973	0.0254537	0.138017	0.000784165	0.0864928	0.01414	0.169569	-0.0100694	0.0860527	-0.0758619	0.116673	0.0336076	-0.0170935	0.0842091	0.130609	0.071596	0.107556	0.0523175	0.00105627	0.0647726	0.115732
TaxonAdjustedID.MGS.down.10000000.v6.2067	CAG02020	MGS	NA	0.05205	-0.0456986	0.0736855	-0.0602804	-0.0111384	0.0921257	0.0172168	0.0681268	0.210936	0.0650233	-0.0327087	-0.0334363	0.0604097	0.0259407	-0.015407	-0.0991642	0.157416	0.115423	0.042056	0.0348672	0.103742	0.0278314	0.104022	0.0188674	0.0725458	0.0743241	0.119356	0.182656	0.09683	0.0552822	0.0630633	-0.0232662	0.0109857	0.052011	0.0778269	-0.0228318	0.0170818	0.0989477	0.0574563	-0.00899041	0.00833927	0.170054	0.0792521	0.0782814	-0.00432685	0.0125666
TaxonAdjustedID.MGS.down.10000000.v6.2071	CAG02025	MGS	NA	0.0672928	0.126403	0.125298	0.0305426	-0.155043	0.0617095	-0.0206253	0.0280802	0.0210813	-0.00820265	0.00478848	0.0734975	0.139079	0.0455439	0.0688631	-0.0988306	0.0549893	0.0507044	-0.00328323	-0.0566631	0.00231065	0.144122	0.0150081	-0.117577	0.0397732	0.105209	-0.0467845	-0.0747642	0.0884844	-0.0184608	-0.0777902	0.0249098	0.0272156	0.0654182	0.0598546	0.026994	-0.0404533	0.0457334	0.065023	-0.00115476	-0.0868194	-0.00194583	-0.0161814	-0.0515943	0.012134	-0.0874376
TaxonAdjustedID.MGS.down.10000000.v6.2074	CAG02028	MGS	NA	-0.0737449	-0.0893372	-0.049545	0.0312371	0.0169973	-0.0126507	-0.00435099	-0.0965333	-0.0669152	-0.00337312	-0.0359822	-0.0430455	0.111932	0.0374185	0.00409045	0.0245349	-0.0304606	-0.0532749	0.149628	0.0304692	-0.0468145	0.0753663	0.0293545	-0.0398272	-0.04572	-0.0234664	-0.117877	0.120008	0.0304741	0.00195296	0.0161821	-0.00755762	0.0103604	-0.0268288	-0.158224	-0.0364714	-0.0535047	-0.0271023	0.0417079	0.0379436	0.0636094	0.0678884	-0.0425507	-0.00258434	-0.0643023	0.031248
TaxonAdjustedID.MGS.down.10000000.v6.209	CAG50001	MGS	Bacteria;Firmicutes;Clostridia;Clostridiales;Lachnospiraceae;unclassified Lachnospiraceae;unclassified Lachnospiraceae	-0.00307038	-0.0325036	0.123543	-0.135646	0.0166985	0.0287782	-0.0486817	0.0657684	-0.0292018	-0.0834456	-0.0621371	-0.000426448	0.0237442	-0.0306586	0.0512012	-0.220256	0.0165454	-0.0476697	0.0111816	0.0560736	0.0939201	0.0113863	-0.0166178	-0.110636	0.0221727	0.00389469	0.00139171	0.0137463	0.0505887	-0.0790936	0.0392721	0.0210452	-0.0899677	0.000322832	0.0133336	-0.00950434	0.016333	-0.0029287	-0.00514929	-0.12874	-0.0384645	0.0525647	-0.0111462	0.0600002	-0.0236236	-0.00598741
TaxonAdjustedID.MGS.down.10000000.v6.2092	CAG02046	MGS	NA	0.168684	0.0482576	0.11748	0.00635916	-0.12258	-0.00583703	-0.0405864	-0.0524057	-0.062438	0.0188138	-0.0820639	0.0342703	0.0177781	0.0043258	0.0157405	0.059318	-0.0532886	0.0240298	-0.0826188	-0.0904763	0.0293044	0.0333395	-0.0512666	-0.00346624	-0.0282799	0.109743	-0.031623	0.073485	0.0480404	-0.0538421	0.0356338	0.0100904	-0.0451029	-0.0189449	-0.00682613	0.0863022	0.0992655	-0.0390619	-0.000706139	0.0203744	-0.0135442	0.0948816	-0.0777595	-0.0575453	0.0180445	0.0835262
TaxonAdjustedID.MGS.down.10000000.v6.2098	CAG02053	MGS	NA	0.186519	-0.00233677	-0.0368915	0.0941569	-0.0598704	0.0621654	0.0344926	0.00800103	0.0160957	-0.0345224	-0.0465325	0.124205	0.0136067	-0.0315535	-0.0111848	0.0558401	0.0160876	0.0522932	0.0575401	0.00293065	-0.0119878	0.0724478	-0.00582395	-0.0279242	0.000762992	-0.0701419	0.0648724	-0.0916011	-0.0132936	-0.0866371	-0.0818237	0.0619227	0.0271713	-0.0224482	-0.032586	0.096488	0.0275434	-0.139838	0.0727532	-0.0012579	-0.0826866	-0.0414388	0.000868608	0.134699	0.0342905	-0.0115954
TaxonAdjustedID.MGS.down.10000000.v6.210	CAG00202	MGS	Bacteria;Bacteroidetes;Bacteroidia;Bacteroidales;Tannerellaceae;Parabacteroides;Parabacteroides johnsonii	-0.121287	0.0712707	0.136756	-0.140504	0.00861293	-0.119076	0.0037223	-0.0528305	-0.00634741	0.0175833	0.121358	-0.0494064	-0.117763	0.044245	-0.111352	-0.00496304	-0.0653794	-0.100793	0.00919959	0.129026	-0.0987301	0.0809679	0.0296595	-0.0756276	0.0163861	0.0446488	0.106159	-0.0869562	0.0152619	-0.0179722	0.0587961	-0.145497	0.0688724	0.00501867	0.0426318	-0.00423943	0.0852455	-0.0314808	0.00898611	-0.0252171	-0.0575931	-0.0776649	-0.00714943	0.0900219	0.0414095	-0.110708
TaxonAdjustedID.MGS.down.10000000.v6.2102	CAG02057	MGS	NA	0.0863075	-0.0273436	0.15617	0.0150347	-0.169682	0.0808433	0.0929952	0.0339362	0.0147717	-0.036188	-0.0237026	0.00366886	0.115101	0.0681665	-0.043868	-0.0192749	-0.0310897	0.0700195	0.0820554	-0.0241974	0.0935837	-0.0516392	0.0366259	0.0266685	0.0544351	0.020176	-0.0102501	0.0929337	0.0579465	-0.0790545	0.0419411	-0.0689721	0.00540075	-0.0780186	0.034084	-0.0255158	0.148378	-0.059542	-0.0536626	0.141072	-0.0174045	0.087669	0.114496	-0.019188	0.0132454	0.171615
TaxonAdjustedID.MGS.down.10000000.v6.2103	CAG02058	MGS	NA	0.0213583	-0.147963	0.0500071	-0.057755	0.00967325	-0.0342667	0.0326313	0.0389787	0.0286711	-0.167145	-0.036265	-0.0475985	0.0339171	-0.0513479	-0.0921028	-0.0278707	0.0144705	-0.00694485	-0.0282224	0.107124	-0.0316159	0.0673613	-0.0364609	0.0437452	-0.055781	-0.0580264	-0.0742248	0.0117449	0.120431	0.0405471	-0.0321975	-0.0432573	-0.00385681	-0.0879229	0.071349	-0.059185	0.0490331	-0.0273548	0.00518865	-0.0418057	-0.0551368	-0.116012	-0.0342809	0.00222583	-0.0255205	0.0993866
TaxonAdjustedID.MGS.down.10000000.v6.2107	CAG02062	MGS	NA	0.105485	0.0682635	-0.0104626	0.122182	-0.114652	0.0754049	0.0848805	0.0129494	0.0241494	-0.0346533	0.121764	0.0782684	-0.00974334	0.0161277	-0.0672615	0.0938594	-0.021208	0.00337639	0.00418927	0.0428116	0.0204319	-0.0231521	-0.0148099	0.0065809	0.0245016	-0.0111808	0.0473682	-0.0458313	0.0042241	0.110627	-0.0545116	0.0802581	0.055691	0.0488289	-0.0162711	0.0931959	0.047523	-0.134431	0.0638844	0.0592168	-0.00114556	0.0176291	0.0738931	-0.0659951	0.178728	0.00702255
TaxonAdjustedID.MGS.down.10000000.v6.2113	CAG02068	MGS	NA	-0.0243624	-0.0670956	-0.0299751	0.0162811	0.0129613	-0.0116415	0.111217	0.0672455	-0.0153099	-0.0911008	-0.0568	-0.0526159	-0.0686812	0.0381365	0.0538918	-0.0332766	-0.0578982	0.0220455	0.0114734	-0.0898781	0.0725044	-0.0158277	-0.0794435	0.0624606	-0.103598	0.101169	-0.138789	0.13303	0.00312293	0.0201975	-0.0385883	-0.0970311	0.08507	0.0147696	0.0365939	-0.0850444	-0.00365298	-0.0932648	0.0236533	-0.120971	-0.0451866	0.110549	0.145132	-0.00754046	-0.0481576	0.0102526
TaxonAdjustedID.MGS.down.10000000.v6.2116	CAG02071	MGS	NA	-0.0248151	0.0684194	0.0703135	-0.0802731	0.0126454	-0.109796	-0.00772996	0.0774025	-0.0684089	-0.13326	-0.0301978	-0.0185018	0.0304209	0.0268059	-0.0399184	-0.0670047	-0.111476	-0.0137626	-0.0900534	0.00529242	-0.00853181	0.0685184	-0.0656425	-0.032035	0.00149615	0.0364928	-0.0803358	0.0417901	-0.0108518	-0.0780566	0.0470685	-0.121405	-0.0720191	-0.0675986	0.0361752	-0.0821427	-0.179838	-0.0373843	-0.0755869	0.0101634	-0.0622648	-0.0251354	0.0381132	-0.000288314	-0.0639092	-0.0894577
TaxonAdjustedID.MGS.down.10000000.v6.2122	CAG02077	MGS	NA	0.102154	0.0116912	-0.017868	0.103415	-0.088137	0.122727	0.0225786	0.0645539	0.0322178	-0.0337533	0.0253212	0.193264	0.0777893	0.0422397	0.0837342	0.0917193	-0.0281172	0.073547	0.0242073	-0.0524697	0.0735986	-0.00619431	0.127647	-0.0402283	0.0664679	0.0632006	0.0580876	0.0648189	0.0522126	0.102324	0.0275662	0.0230955	-0.00176117	0.072595	-0.0830243	0.0617492	-0.139569	0.0568334	-0.0531106	-0.0396714	0.0212077	-0.0345197	-0.0359696	-0.0274648	0.079862	-0.0536597
TaxonAdjustedID.MGS.down.10000000.v6.2140	CAG02093	MGS	NA	-0.00265559	-0.0552112	0.0807432	0.0436554	-0.124436	-0.0631312	-0.0417756	0.0283168	0.0498767	0.0785585	0.0382218	-0.0401806	0.039586	0.0552434	-0.107695	0.0356318	-0.0724192	-0.0237817	0.106506	-0.0166487	-0.0686455	-0.0317141	0.106619	0.0338298	-0.0158466	0.0400669	0.0109519	-0.0302137	0.0768064	0.0755725	-0.0602592	-0.0621503	0.0172575	-0.0884676	0.101237	0.0171406	0.0166217	-0.0801126	0.0144206	0.011588	-0.101011	-0.150843	-0.0185052	0.00678378	0.0963563	0.0100836
TaxonAdjustedID.MGS.down.10000000.v6.2144	CAG02097	MGS	NA	-0.0800785	-0.127877	-0.000131913	0.00751703	-0.00755943	-0.031313	-0.0502353	0.0281471	0.0527795	0.127003	-0.0642043	0.0258411	-0.0412758	-0.00997196	0.026697	-0.00750058	0.0196271	0.0920296	0.0466358	0.0756591	0.0153786	0.040097	0.122192	-0.0972321	-0.0663308	0.0869243	-0.110092	-0.0158326	0.0536337	-0.069386	0.0670438	0.00535433	0.119046	-0.0734097	-0.00011689	-0.0940969	-0.0648923	0.00935933	-0.0493014	-0.00439918	-0.000341183	0.0894725	0.0150296	0.0363047	-0.0966383	-0.113061
TaxonAdjustedID.MGS.down.10000000.v6.2147	CAG02100	MGS	NA	0.0179951	0.0875769	0.0228271	0.0488876	-0.072565	0.00779514	0.0994693	0.126166	0.00083219	-0.118286	0.115498	0.0159963	0.02272	-0.0992899	0.0319723	0.0520127	0.0123628	-0.0851882	-0.037992	-0.0148667	0.0659289	-0.0239507	-0.0873828	-0.00884218	-0.115455	-0.0544698	-0.00140429	0.0250899	-0.0214359	-0.0887803	-0.0724203	0.0160902	-0.0567991	-0.0483637	0.0289908	0.0166228	0.114955	-0.041633	0.0414527	-0.129802	0.0088127	0.0202748	0.0796918	0.0496882	0.075927	-0.106481
TaxonAdjustedID.MGS.down.10000000.v6.2156	CAG02108	MGS	NA	0.0921228	-0.0564023	-0.0850145	0.235124	-0.15653	0.0154841	0.0802064	0.040464	0.0110271	0.0257255	0.0265457	-0.0273403	0.178571	-0.0781405	-0.0504338	0.09858	-0.0729729	0.161535	0.0695209	-0.108556	0.0142831	-0.0480385	0.0555717	0.0656515	-0.0913898	-0.0447299	-0.0471771	-0.0436489	-0.0167633	-0.0952013	-0.121023	0.0716538	0.000914765	-0.0598574	-0.0452194	0.0696379	-0.0802597	0.0183168	0.0372351	0.0944694	-0.0286821	-0.0206917	0.0775647	-0.0890256	0.192143	0.0117444
TaxonAdjustedID.MGS.down.10000000.v6.2157	CAG02109	MGS	NA	0.163849	0.0105846	0.110778	0.122466	-0.234733	0.0861759	0.156352	0.130493	0.128116	-0.0369926	0.0358514	0.0179705	0.14652	0.115073	0.0731257	0.0920603	-0.0814859	0.109246	0.087992	-0.087184	0.0894087	-0.0196339	0.0156675	0.05097	0.0450227	0.00287931	-0.0404749	0.0546028	0.103632	-0.00389996	-0.0154675	0.0206605	-0.0904588	-0.0175267	0.155176	0.0401773	-0.00133251	-0.0218673	0.0276667	-0.03553	-0.0400476	0.0316953	0.13453	-0.0582231	0.149301	0.019534
TaxonAdjustedID.MGS.down.10000000.v6.216	CAG00208	MGS	Bacteria;Firmicutes;Clostridia;Clostridiales;Ruminococcaceae;Gemmiger;unclassified Gemmiger	0.113956	0.0365588	-0.0844854	0.132373	-0.0519398	0.193478	-0.0201055	-0.00671575	0.0145465	-0.0538209	-0.0320343	0.169217	0.10309	-0.0338303	0.0638922	0.038194	0.0513586	0.0394842	0.000532487	-0.13269	-0.0167597	-0.0430111	0.0351239	-0.0493207	-0.0995075	-0.0181163	0.0233888	-0.0226161	-0.0370936	0.0676144	0.0343764	0.100062	0.0291224	0.0861977	-0.0733154	0.0886977	0.0651547	0.0718558	0.0437109	0.00240317	0.0471705	0.0439629	0.085294	0.00748455	0.0853969	0.0498848
TaxonAdjustedID.MGS.down.10000000.v6.2160	CAG02112	MGS	NA	-0.126631	0.0209257	-0.0617126	-0.0658085	0.128295	0.0643346	-0.0230237	-0.0521571	-0.0540573	0.0493996	-0.0215521	0.0411003	0.0567889	-0.0410598	-0.0418314	-0.0285259	0.0422655	-0.0912429	0.000628421	-0.00329398	-0.0909633	0.0848027	-0.0199958	0.0023353	-0.0828121	-0.0503773	-0.0893609	-0.134723	-0.0922336	0.0861423	0.177138	0.0474698	-0.0250062	0.00280365	-0.0256168	-0.105114	0.000609329	0.112153	-0.028059	-0.0358663	0.0968102	-0.0677834	-0.0158938	0.0113509	-0.0661413	-0.0529769
TaxonAdjustedID.MGS.down.10000000.v6.2168	CAG02119	MGS	NA	0.0564823	0.000533363	-0.0889156	0.0243154	0.0629777	-0.00424866	-0.0738625	-0.0882959	0.075761	0.164051	-0.0163061	-0.101813	0.0582962	-0.00982319	-0.0384874	0.0636522	0.0528569	0.0228445	0.0543646	-0.0432311	-0.0607885	0.00787649	0.119812	0.0119219	-0.0128383	-0.138842	-0.0856144	-0.0149195	-0.0343519	-0.0220894	-0.0529423	0.00284062	0.00777911	0.0939571	-0.020179	-0.0422761	-0.0360025	0.120431	-0.0258416	0.0359645	-0.00385294	-0.00798004	0.0356068	-0.00985367	0.0152499	0.0537364
TaxonAdjustedID.MGS.down.10000000.v6.2169	CAG02120	MGS	NA	-0.0700081	0.0295116	0.0439722	0.114112	-0.16018	0.130878	0.0371453	0.0158094	0.078965	0.00575018	0.0101731	0.00604915	0.204676	0.140441	-0.035729	-0.0458268	0.0228516	0.124783	0.112321	-0.112341	-0.00378122	0.0727837	0.0926733	-0.000575624	-0.127256	0.0301534	0.0812619	-0.0242037	-0.00258704	0.175491	-0.00119408	0.0861303	0.0253717	-0.0532236	0.0595559	0.0715843	0.102574	0.123091	0.00982158	0.0946319	-0.0477561	0.0274646	0.146023	-0.0174525	0.0485592	0.0264333
TaxonAdjustedID.MGS.down.10000000.v6.217	CAG00209	MGS	Bacteria;Bacteroidetes;Bacteroidia;Bacteroidales;Barnesiellaceae;Coprobacter;Coprobacter fastidiosus	-0.0781807	-0.0438476	0.0116665	-0.0695424	0.0596135	0.0503916	-0.0349109	0.0166274	0.0529867	0.00253911	-0.0359927	-0.0329564	0.0608185	0.0894336	0.0372518	-0.00357312	0.10929	0.0240263	-0.0239329	0.0217262	0.0603569	0.0186895	0.0526381	-0.0156199	0.020388	0.109425	0.0642205	0.137961	0.113619	0.108736	-0.00835989	-0.0688633	0.205545	0.102015	0.0800861	-0.0422875	0.0164715	0.037774	0.0686366	-0.0636979	-0.0165487	0.0851359	0.0343756	0.0511222	-0.0174683	0.128378
TaxonAdjustedID.MGS.down.10000000.v6.2170	CAG02121	MGS	NA	0.0462192	0.0955019	0.0698275	-0.0420015	-0.0260255	0.00523764	-0.0942811	-0.080301	-0.0034531	0.0743607	-0.0659366	0.0151329	-0.005084	0.0435352	0.0383776	0.00860019	-0.0495027	-0.00265327	-0.00898815	0.00355074	-0.0178042	0.0574597	-0.0144124	-0.0612656	-0.013414	-0.0725282	0.0319018	-0.00444759	-0.113486	0.0175558	0.0886859	-0.0210118	0.0189188	0.0452556	-0.0238295	0.0547398	-0.0838861	0.0168869	-0.00583759	0.0144175	-0.0505997	-0.00961162	-0.0730017	0.0114584	-0.0220061	0.00010276
TaxonAdjustedID.MGS.down.10000000.v6.2173	CAG02124	MGS	NA	0.0949546	-0.142351	0.0686699	-0.0321601	-0.0349493	-0.0248755	-0.149887	-0.201763	-0.0172498	0.0722111	-0.12779	-0.0723906	-0.0609755	-0.0463806	-0.0342828	-0.0434501	0.00844689	-0.0255197	0.0615447	-0.00255839	-0.135202	0.0852186	0.00404399	-0.0786515	-0.0676033	-0.0457458	0.00162584	0.0423382	0.0776892	-0.0198506	0.0373398	0.0866616	0.116938	0.042104	-0.122309	0.0632812	-0.0154952	0.0788799	-0.0637183	-0.0408784	-0.0180903	0.0365673	-0.0712176	0.0695669	-0.0386245	0.0121901
TaxonAdjustedID.MGS.down.10000000.v6.2174	CAG02125	MGS	NA	-0.137461	-0.0179001	-0.0102758	-0.0976255	0.110022	-0.0406723	-0.100879	-0.0778197	-0.118434	0.0287943	-0.0293578	-0.0143491	-0.0725531	-0.0507258	-0.0629899	-0.0147941	0.0317144	-0.108045	-0.0772793	0.0203689	-0.108742	0.0189433	-0.0897534	-0.0746389	-0.109734	-0.0952202	-0.084742	-0.139158	-0.0511228	0.071809	0.0911527	0.0120331	0.00356524	-0.0205473	-0.0127361	-0.0537833	-0.0322923	0.137518	-0.0149592	-0.0846897	0.0789478	-0.128842	-0.11327	0.0222238	-0.108001	-0.0810204
TaxonAdjustedID.MGS.down.10000000.v6.2178	CAG02128	MGS	NA	0.165961	-0.0878995	0.0312634	0.0411526	-0.0729876	0.101539	0.00353617	0.00342941	0.10274	0.0527444	0.0011903	0.00882039	0.0593654	-0.0182863	-0.0691936	0.00473865	0.029825	0.0946211	0.140293	0.0310271	0.0900599	-0.0525588	-0.0131227	-0.0414474	0.0102243	0.127406	-0.00883095	0.0448483	0.103155	0.0305357	-0.0334357	0.00654601	0.12144	0.0291692	0.0566558	0.0881085	0.0109495	0.0396251	0.0141461	0.029462	-0.0346014	0.0463382	0.0486284	0.0489797	0.102281	0.119051
TaxonAdjustedID.MGS.down.10000000.v6.218	CAG00210	MGS	Bacteria;Firmicutes;Clostridia;Clostridiales;Ruminococcaceae;Ruminococcus;Ruminococcus bicirculans	-0.0688552	-0.00308298	0.0658855	-0.101778	0.0390191	0.087256	0.0193655	0.0304783	-0.000326383	0.056207	0.0446309	0.0845559	0.0191034	0.0224073	-0.0461396	-0.0685557	0.0480559	-0.146406	0.0715437	0.0583515	0.0427907	0.00629149	-0.0692326	-0.0169525	0.012205	-0.00282177	-0.0157635	-0.0046642	0.0508038	-0.0364541	0.0244031	0.0124201	0.0494762	0.173504	0.0207019	-0.0239869	0.109566	0.017527	0.0327638	-0.148475	0.056003	-0.0367484	0.0196415	0.0887901	-0.0645765	-0.033786
TaxonAdjustedID.MGS.down.10000000.v6.2181	CAG02131	MGS	NA	0.18099	0.127507	-0.0894143	0.276642	-0.194654	0.0953616	0.020862	0.00819268	0.0518659	0.0564885	0.0898684	0.104944	0.282604	-0.0673831	0.0497476	0.160792	-0.0983263	0.119265	0.0311445	-0.114406	-0.0330401	-0.0207225	0.0793874	0.0472364	-0.0118334	0.032203	-0.0295786	-0.0972084	0.0337142	-0.0139906	-0.108661	0.0905985	-0.0226359	-0.025566	-0.0505782	0.174553	0.0123168	0.0502099	0.0403155	0.0419868	-0.0259023	0.00386842	0.0236337	0.05574	0.114798	-0.0435473
TaxonAdjustedID.MGS.down.10000000.v6.2186	CAG02136	MGS	NA	0.0547517	0.0550031	-0.0169463	0.172094	-0.159305	-0.0265024	-0.0684636	-0.179339	-0.0320215	-0.0640839	0.0262145	-0.0470711	0.10434	-0.039637	-0.0711463	0.0195582	-0.00643548	0.120376	0.0689214	-0.0841908	-0.126253	-0.0203784	-0.0691956	0.0146852	0.0623744	0.0174904	-0.127788	-0.036726	-0.0602571	-0.0509341	-0.110059	-0.012477	0.00630212	-0.0306783	-0.0388221	0.10726	-0.0687789	0.00954569	0.029151	0.0344983	0.037067	-0.0978293	-0.131093	-0.110586	-0.0283957	0.0112308
TaxonAdjustedID.MGS.down.10000000.v6.219	CAG00211	MGS	Bacteria;Firmicutes;unclassified Firmicutes;unclassified Firmicutes;unclassified Firmicutes;unclassified Firmicutes;Firmicutes bacterium CAG:227	-0.106084	-0.0339981	0.100992	-0.1204	0.0233828	0.0338283	0.125725	0.0800407	0.0814338	-0.0518014	0.00340629	-0.017774	0.0406415	0.119731	0.0284031	-0.243489	-0.059891	0.0107052	-0.12677	0.0334312	0.144294	-0.0642658	0.0417275	0.022732	-0.0118312	0.0308853	0.0243401	-0.011599	0.025744	-0.0324427	0.00264339	-0.060367	-0.0284486	0.0195838	0.0491137	-0.0264879	0.0356727	0.0436086	0.000912391	0.00368001	-0.0448652	0.0763835	0.110556	-0.00332285	0.0223678	-0.00597089
TaxonAdjustedID.MGS.down.10000000.v6.2195	CAG02144	MGS	NA	0.139424	-0.0561176	-0.124193	0.0322843	0.0896808	0.0530427	-0.0763411	-0.0920838	0.0301642	0.0992638	0.107087	0.0734765	-0.00565371	-0.0799144	0.0474157	0.0567081	0.0563394	0.0119657	0.0965992	-0.0440773	-0.0902455	-0.0373047	0.103572	-0.029839	-0.0274062	-0.0995853	0.0770826	-0.0394067	-0.0019996	0.0223429	0.0425836	0.104879	-0.00787121	0.129772	-0.0339658	-0.00207902	-0.0292425	-0.0194561	0.0795924	0.0311886	0.0289661	0.0871524	-0.0492929	-0.0794634	0.0785001	-0.0615314
TaxonAdjustedID.MGS.down.10000000.v6.2198	CAG02146	MGS	NA	0.184988	-0.0475441	0.0146069	0.102759	-0.119552	-0.0763005	-0.0619828	-0.0366178	-0.100745	-0.155769	-0.0157717	-0.0389915	-0.134669	-0.0590223	-0.00041996	-0.0935125	-0.119305	0.199229	0.0512699	-0.0320709	-0.0641275	0.0606967	-0.0768217	0.00799454	0.00505304	0.0768681	-0.0130722	-0.0387165	-0.0502469	-0.142874	-0.0729007	0.0720339	-0.000408535	-0.0576179	-0.0556645	0.108053	-0.0588511	-0.0280848	0.00702138	-0.0538353	-0.169026	-0.00753508	-0.0621659	-0.0137261	0.0382701	-0.0826337
TaxonAdjustedID.MGS.down.10000000.v6.220	CAG00212	MGS	Bacteria;Proteobacteria;Deltaproteobacteria;Desulfovibrionales;Desulfovibrionaceae;Bilophila;Bilophila wadsworthia	-0.0844215	-0.151186	0.0582157	-0.169493	0.115869	-0.0455396	-0.0819675	-0.0303159	-0.0823305	-0.0577961	-0.047414	-0.108145	-0.0366815	0.0145055	0.0865304	-0.0669853	0.0301263	-0.0295155	-0.0371469	0.124089	-0.0217003	0.15275	0.0203131	-0.0559815	0.0306562	-0.0130769	-0.0215623	0.0525369	0.0743344	-0.0655188	0.0605015	-0.0972942	-0.0239876	-0.0391507	-0.0328187	-0.0944892	-0.00542945	0.000394463	-0.0299546	-0.131566	0.014436	-0.00365548	-0.0423371	0.170991	-0.0814423	0.0260282
TaxonAdjustedID.MGS.down.10000000.v6.2200	CAG02148	MGS	NA	0.114616	0.085782	-0.00623115	-0.0505538	0.0578721	-0.0318274	0.0338546	0.0785321	0.0412366	0.0166696	-0.0557363	-0.00201738	-0.0421634	-0.046621	0.0265621	-0.0438786	-0.0229824	-0.0669427	-0.000343675	-0.0424786	0.0276989	0.0308994	0.126171	0.0182624	-0.0087999	0.0145768	0.00704292	-0.222801	-0.10739	-0.004989	-0.0366078	-0.0943029	-0.0774486	-0.0610813	0.0539781	-0.14508	-0.100956	-0.0912475	0.0273402	-0.0735235	-0.0280433	-0.0708755	0.0824369	-0.0461967	0.019541	-0.00415031
TaxonAdjustedID.MGS.down.10000000.v6.2202	CAG02150	MGS	NA	0.0856507	-0.0154614	-0.0772353	0.126915	-0.0535204	0.00960935	-0.0670283	-0.091193	-0.0358087	-0.0205353	0.0358226	-0.00561261	0.0658643	-0.0379819	-0.0281774	0.0503695	-0.0462416	0.145856	0.0377263	-0.0177619	-0.0782868	0.029484	-0.0402114	-0.117974	-0.116625	0.0134363	-0.0708259	-0.0105245	0.0476049	-0.121681	-0.0585159	0.0504122	0.0962877	0.0924858	-0.102877	0.0467728	0.00833067	-0.0928717	0.0123711	-0.0017089	-0.0634072	0.041715	-0.044359	0.0114974	0.161492	0.0885742
TaxonAdjustedID.MGS.down.10000000.v6.2206	CAG02154	MGS	NA	-0.0406444	-0.00699277	-0.0390106	-0.022876	0.0619456	0.0594329	0.0147003	-0.00215352	0.0249193	-0.0140085	0.012872	0.0267376	0.013045	0.155621	0.0737491	0.0535055	0.0378552	0.00113116	0.014534	0.023233	0.014743	0.0663754	0.00109637	0.0222671	-0.0954469	0.0115671	0.0387101	-0.00255988	0.0328234	0.0978373	-0.0164812	-0.0883427	0.17059	0.0778097	0.0471272	-0.030494	-0.0775673	-0.0612826	-0.0972017	-0.0176152	0.0330828	0.0367849	0.0114205	0.129867	0.0353282	0.0354375
TaxonAdjustedID.MGS.down.10000000.v6.2210	CAG02158	MGS	NA	0.0746919	-0.0759812	0.0818701	-0.0610657	-0.0184217	0.00290851	-0.0389973	0.00209797	0.170657	0.0749695	-0.0154085	-0.100945	0.0285535	0.0365678	-0.0276594	-0.115811	0.0920727	0.0818203	0.0722482	0.0341346	0.00714526	-0.0120033	0.0761204	-0.0233167	0.0537783	0.0731299	0.118365	0.237059	0.0861837	0.0392189	0.0137165	-0.0330332	0.0613458	0.0544442	0.0229244	-0.0296246	0.020394	0.085532	0.0404914	0.0112928	-0.0257826	0.16863	0.0354399	0.0599758	-0.0333986	-0.0437977
TaxonAdjustedID.MGS.down.10000000.v6.2212	CAG02160	MGS	NA	0.0807115	-0.130483	0.0471239	0.0514509	-0.0991933	0.142911	0.0249155	-0.0782321	0.0418968	0.0158831	-0.0640393	0.0746351	0.0555813	-0.0293661	0.0617325	-0.035612	0.0191421	0.0173629	0.0752295	-0.0881862	0.0277602	0.076571	-0.070481	-0.0384191	-0.044012	0.0738007	0.0813955	0.117104	0.0872684	0.0478846	-0.00213631	0.0253431	0.110783	0.0352818	-0.0523041	0.0607013	0.000144941	0.0375411	-0.0062014	0.0282464	0.0810472	-0.0180043	0.0599135	0.0436133	0.0394165	0.106788
TaxonAdjustedID.MGS.down.10000000.v6.2219	CAG02165	MGS	NA	-0.0496728	-0.0827466	0.172415	-0.139996	-0.0271393	-0.012887	-0.104219	-0.0116816	-0.0140305	0.0428763	-0.0538041	-0.05675	-0.0507041	0.0587868	0.0206795	-0.0330513	0.0333116	-0.0394628	0.0735748	0.0726929	-0.00288153	0.114904	0.019056	-0.104886	-0.0523114	-0.0190189	-0.0666994	0.00179151	0.179911	-0.0156261	0.0532104	-0.0416256	0.0820428	0.0372971	0.101115	-0.0229426	-0.0165814	0.0382301	0.0245576	-0.0352905	-0.0649424	-0.0416233	0.0523129	0.19542	-0.138972	0.0196552
TaxonAdjustedID.MGS.down.10000000.v6.2221	CAG02167	MGS	NA	-0.072377	0.157376	0.0872607	-0.0448041	-0.0403831	-0.0625006	-0.0283168	-0.0155307	0.0210754	-0.0238561	0.0516795	0.0331058	-0.0431603	0.0674247	-0.0797227	-0.0517324	0.072137	0.00910952	0.00591956	0.072073	-0.00111533	0.0185104	-0.0606735	-0.0854999	0.0647814	-0.0125981	0.10297	0.019017	0.0687164	-0.0751531	-0.0388893	-0.0357777	-0.0418358	-0.0231903	0.0769045	0.0521756	0.0225435	-0.096586	0.112122	0.0331479	0.013145	-0.0147161	-0.0972542	-0.0360813	0.0905214	-0.16867
TaxonAdjustedID.MGS.down.10000000.v6.2226	CAG02171	MGS	NA	0.0332275	-0.0529352	0.316375	-0.0851458	-0.225487	-0.0245845	-0.0201482	0.0862957	0.11002	-0.0531308	-0.0511527	0.04504	-0.0642434	0.0360521	-0.0158065	-0.161925	-0.0512801	0.0508569	-0.00212109	-0.0134577	0.066101	0.114216	-0.116327	-0.130911	-0.0169002	0.0885546	0.0638895	-0.106412	0.0566689	-0.121716	0.0528037	-0.0993086	0.0797616	-0.0315391	0.179538	0.00379948	0.00980935	-0.0305174	0.00544356	-0.14148	-0.117923	0.00364468	0.147919	0.0393492	-0.0258689	-0.0367717
TaxonAdjustedID.MGS.down.10000000.v6.2242	CAG02186	MGS	NA	-0.121472	-0.249573	-0.0598785	-0.148019	0.210582	-0.148738	-0.105586	-0.0544135	-0.0396002	0.00318312	-0.137284	-0.105315	-0.14591	-0.119486	-0.0138629	-0.142995	-0.0265681	-0.0510084	0.0330799	0.09509	-0.0605431	0.102979	-0.0461941	-0.0853882	-0.0696724	-0.144253	-0.0799666	0.0233851	-0.022158	-0.0812371	0.0455703	-0.00464268	0.0333394	0.0296516	-0.121952	-0.0950149	-0.0407416	0.0133201	-0.0792206	-0.0779998	0.00949396	-0.00104059	-0.080888	0.075991	-0.160424	-0.0295352
TaxonAdjustedID.MGS.down.10000000.v6.2253	CAG02196	MGS	NA	-0.00234385	-0.0515176	0.0424622	0.0410667	-0.0839646	0.0215925	-0.0424811	-0.0213961	-0.0844446	-0.0204089	-0.0457881	-0.0154207	0.0142689	-0.0815619	0.0482667	0.0878077	-0.00588931	0.0236803	0.0434073	-0.13407	-0.087711	-0.0526099	0.0195423	-0.0309237	-0.050591	0.0328648	0.00880987	-0.0110425	0.0314565	-0.0670688	-0.089639	-0.0346373	0.187388	0.0590259	0.0267376	0.0734151	0.0291307	0.00124375	-0.0630825	0.0123512	-0.115791	-0.0938359	0.052701	0.0882986	0.0223844	0.00320589
TaxonAdjustedID.MGS.down.10000000.v6.2256	CAG02199	MGS	NA	0.0649799	-0.204071	-0.0195846	-0.0209381	0.0407695	0.0123284	0.031059	-0.0186333	0.0320942	8.01e-06	-0.050993	0.0453008	-0.0937597	-0.108766	0.0849919	0.0703563	0.00294825	0.0576353	0.0484975	0.0276641	0.00817996	-0.0176738	0.0102964	0.0388349	0.0383883	-0.0236621	-0.0854844	0.103104	0.0733311	-0.0824706	-0.0470609	0.0679954	0.0772564	-0.0483715	-0.0738397	-0.00278985	-0.064619	0.122943	0.0930195	-0.0358728	-0.0245658	-0.0394585	-0.0293448	0.0737616	-0.0808839	-0.0202584
TaxonAdjustedID.MGS.down.10000000.v6.2257	CAG02200	MGS	NA	0.168999	0.0964983	-0.0816749	0.165361	-0.088463	0.0899535	0.101767	0.0777321	0.119526	-0.0624572	0.0764935	0.107488	0.102664	0.0582031	-0.0142148	0.116467	0.00381153	0.0777221	0.0951698	-0.0398765	0.0813518	-0.0888207	-0.032108	-0.00615236	-0.119351	0.0747159	0.0930979	0.064939	0.0246707	0.0103918	0.00192646	-0.0264033	0.00551444	0.0446029	0.00795763	0.0728969	0.019837	-0.0866394	0.0566996	0.0654564	-0.0358415	-0.00956634	0.120038	0.0490566	0.169953	0.0437944
TaxonAdjustedID.MGS.down.10000000.v6.2258	CAG02201	MGS	NA	-0.125577	-0.0368402	-0.0293529	-0.111317	0.142877	-0.0406884	0.0152131	-0.00363815	-0.0236546	-0.0525883	0.0352877	-0.0217501	0.0691361	-0.0363578	0.0135102	-0.0712726	-0.0189407	-0.0550835	-0.0661562	0.0783557	-0.080874	-0.0148646	0.00651987	-0.0452635	-0.126468	0.0139125	-0.110553	0.0476534	-0.0235516	0.0373241	0.0658114	-0.0973066	-0.00292919	-0.0490227	-0.00682041	-0.167474	0.0545189	-0.0115402	-0.00736841	-0.0643494	0.0149339	0.0682329	0.0606917	-0.0290209	-0.0437733	0.0190105
TaxonAdjustedID.MGS.down.10000000.v6.226	CAG00218	MGS	Bacteria;Bacteroidetes;Bacteroidia;Bacteroidales;Barnesiellaceae;Barnesiella;Barnesiella intestinihominis	-0.0110657	-0.118691	0.0460995	-0.071469	0.0275633	-0.00829083	-0.0305157	-0.0814755	-0.031714	0.0118697	-0.10834	-0.00714373	-0.031469	-0.0189273	-0.0297807	-0.0434909	-0.0096616	-0.0378566	-0.0366633	0.0790477	-0.0645746	0.0181659	-0.0462985	-0.049581	-0.164586	0.0509093	-0.0630711	-0.0293492	0.0478671	-0.0151127	0.0505072	0.00832139	0.154659	0.0215895	0.000710978	0.00436424	0.037004	-0.0233606	0.0347997	-0.154124	0.0148907	0.0654684	-0.023709	0.0148504	-0.0264724	0.0149665
TaxonAdjustedID.MGS.down.10000000.v6.2266	CAG50008	MGS	NA	0.0442431	0.0118113	-0.0418515	9.94e-05	0.0412491	0.0226202	0.0709949	0.0416256	-0.0637861	-0.0964987	0.0240102	0.111012	0.129115	-0.03347	-0.0421126	0.0447985	-0.0306143	-0.091919	-0.0143376	-0.0437603	0.0762892	-0.0633703	-0.0983396	0.036363	0.00533853	0.0780374	-0.0724944	0.0314048	-0.0548726	-0.0192988	-0.0165255	-0.0662507	-0.0724737	0.0319686	0.0318934	-0.0484371	-0.130936	-0.0291892	-0.0187691	-0.104018	0.00134921	0.0405764	-0.0017724	-0.00752036	0.00716136	0.105009
TaxonAdjustedID.MGS.down.10000000.v6.2272	CAG02213	MGS	NA	0.0328578	0.058696	0.0939099	-0.0487792	-0.0428863	0.0322025	0.106615	0.132879	-0.00657198	-0.138892	-0.0196177	0.0393076	-0.0420451	0.0577248	0.0537107	-0.0578428	0.0328385	-0.0507965	-0.0275764	-0.0340653	0.168787	0.0575698	0.000894748	-0.0312258	0.0717935	-0.000646333	0.0126231	-0.0219166	-0.0139342	-0.0602227	0.025764	-0.0878079	0.0390485	-0.0904403	0.140447	-0.062925	-0.0127866	-0.0248447	-0.00573542	-0.11778	0.0296882	-0.0103434	0.146525	-0.00044238	0.0473483	0.0553507
TaxonAdjustedID.MGS.down.10000000.v6.2274	CAG02215	MGS	NA	-0.0762669	0.111065	-0.069604	0.0972453	-0.0307086	0.0465105	-0.0337597	0.0642616	-0.0223688	0.0281563	0.135718	0.0631132	0.100298	0.0202672	-0.037571	0.106765	0.0246509	-0.0286314	0.011225	-0.0969148	-0.0257766	0.070292	-0.000737645	-0.128321	-0.00718081	-0.0384349	0.0412596	0.00812806	-0.0270727	0.0803863	-0.0707715	0.112425	0.0574019	-0.0585731	0.00629581	0.0323501	0.0347825	0.0187663	0.000877794	0.0789929	0.0501906	-0.0949574	-0.0263459	0.00495147	-0.0269117	-0.0852856
TaxonAdjustedID.MGS.down.10000000.v6.2276	CAG02217	MGS	NA	-0.0830108	-0.0253214	0.0128403	-0.0789821	0.0681103	0.0593193	-0.0296377	0.0222723	0.0441085	0.0222319	-0.0309981	-0.0265382	0.0429106	0.0916637	0.0405269	0.0118137	0.115045	0.00950953	-0.0217358	0.0210695	0.0654836	0.0106633	0.0559184	-0.0055676	0.0215113	0.100334	0.0589664	0.14686	0.120693	0.123896	4.18e-05	-0.0705868	0.203166	0.0996276	0.0886329	-0.0519506	0.0251898	0.0364027	0.0695827	-0.0711502	0.000561308	0.102004	0.0397333	0.0598912	-0.0272321	0.12342
TaxonAdjustedID.MGS.down.10000000.v6.2280	CAG02221	MGS	NA	0.00185932	0.103093	0.0485561	0.0322241	-0.0809398	0.0909617	-0.00669446	0.0358573	0.131527	-0.0065394	0.059457	0.00731974	0.152777	0.0737925	-0.0167645	0.0635023	0.0826874	-0.0529417	0.0887011	0.0471377	0.0830919	0.150606	0.0441828	-0.107995	0.0128876	0.0557087	0.0354695	-0.0320237	0.0398228	0.0620393	-0.103692	-0.0136676	0.130822	0.0531923	0.138499	0.0562622	0.00661071	0.0302444	0.118829	0.0670543	-0.0208756	-0.0921791	0.0598843	0.138119	-0.0474173	-0.0330191
TaxonAdjustedID.MGS.down.10000000.v6.2284	CAG02226	MGS	NA	-0.0939501	-0.116248	0.140334	-0.303494	0.171813	-0.103353	-0.0727227	-0.00977569	-0.0611925	0.0396965	-0.04532	-0.0840608	-0.134479	0.0579344	0.0419237	-0.0841385	0.120538	-0.170856	-0.0718271	0.219006	0.0878423	0.00787076	-0.0918962	-0.0879229	0.0920946	0.0154432	-0.0973262	0.0688614	0.0402187	-0.0523828	0.0325954	-0.137279	0.0925185	0.00603763	0.108924	-0.0678775	-0.0472292	-0.0972442	-0.0521928	-0.148704	-0.0375441	-0.0186933	-0.0794533	0.0659888	-0.167175	0.0573235
TaxonAdjustedID.MGS.down.10000000.v6.2286	CAG02228	MGS	NA	-0.0837805	-0.0946862	0.122131	-0.242126	0.12702	-0.0935413	-0.0908709	-0.000704705	-0.0223517	0.0886908	-0.0485238	-0.11909	-0.166367	0.045773	0.101564	-0.0991496	0.039023	-0.155476	0.0351474	0.122302	0.00466112	0.106032	-0.00957753	-0.00578566	0.0122603	0.00173367	-0.0916431	-0.0197276	0.0708063	0.0306718	-0.00290541	-0.0639916	0.045525	-0.00696534	0.147576	-0.149861	0.0501677	-0.0650013	-0.0660391	-0.169554	0.00631896	0.051339	-0.0184928	0.0938544	-0.176275	-0.0322276
TaxonAdjustedID.MGS.down.10000000.v6.2290	CAG02232	MGS	NA	0.0454062	-0.11061	0.0233419	0.0926184	-0.117809	0.152801	0.139477	0.0847425	0.0919907	0.0629434	0.0210127	0.103938	0.110086	0.00560156	0.11099	-0.0317484	-0.00891386	0.0723467	0.0597482	-0.013361	0.118994	0.0920833	-0.0602409	0.0413007	0.0496392	0.0846	-0.0430498	0.0314692	0.0914544	-0.0783353	-0.0745754	0.067081	0.0539745	-0.0393549	0.0343735	0.0845074	0.0045337	0.036506	-0.0343292	0.0562397	0.034058	0.0885099	0.132938	0.0381837	0.0615873	0.141076
TaxonAdjustedID.MGS.down.10000000.v6.2297	CAG02239	MGS	NA	0.0534784	-0.0198673	0.0697759	-0.0706491	0.00333147	-0.0820673	0.01039	0.0430479	-0.090487	-0.0745194	-0.0854203	-0.0413538	-0.0894274	0.00338034	0.00386841	-0.0815857	-0.0738457	-0.0655868	-0.00309962	0.0139867	0.0413827	0.0514621	0.0690657	0.0526025	0.0484764	-0.0248402	-0.0690531	-0.0569936	0.00481415	-0.180158	0.0235141	-0.0622369	-0.0782435	-0.0268229	-0.0465148	-0.129661	0.00938075	-0.0115615	-0.0631617	-0.078366	-0.0565923	0.109599	-0.00103448	0.0205361	-0.0488501	-0.0987775
TaxonAdjustedID.MGS.down.10000000.v6.23	CAG00760	MGS	Bacteria;Firmicutes;Clostridia;Clostridiales;Ruminococcaceae;Ruminococcus;Ruminococcus sp. CAG:177	0.0485197	-0.0421819	0.0411582	0.0434963	-0.0851617	0.105892	0.0505825	-0.0367241	0.0437526	-0.025579	-0.026834	0.0317538	0.049596	0.00728616	-0.0903076	-0.0171957	0.118507	0.1114	0.0280063	-0.0406819	-0.0145199	-0.0185527	-0.0941129	-0.0253708	0.0785491	-0.0033061	0.0302	0.0729079	0.124222	0.042781	0.0780017	0.0829171	0.0342939	-0.0363641	0.0445676	0.065969	0.0282041	-0.0104052	0.0838978	0.0394152	0.115326	0.111649	0.0455055	-0.0419433	0.0970562	0.140691
TaxonAdjustedID.MGS.down.10000000.v6.2304	CAG02247	MGS	NA	0.0535353	0.0350398	0.257815	-0.0390269	-0.214806	0.0305373	0.0372213	0.00963472	-0.00432888	-0.115208	-0.039462	0.00736781	0.0427775	0.162055	0.0391058	-0.0930322	-0.0222577	0.0573927	-0.00609375	-0.0236594	-0.00960637	0.0621464	-0.213723	-0.105761	-0.044592	0.11497	0.056119	-0.042337	0.196775	-0.0389922	0.0721749	-0.0579023	0.02122	-0.067559	0.11506	0.0170741	0.168758	-0.0276344	0.0822208	-0.0156803	0.0178402	0.0567962	0.133143	-0.00723438	0.0877163	0.0169239
TaxonAdjustedID.MGS.down.10000000.v6.231	CAG00006_1	MGS	Bacteria;Firmicutes;Clostridia;Clostridiales;Oscillospiraceae;Oscillibacter;unclassified Oscillibacter	0.0647159	-0.0707858	-0.163517	0.248817	-0.0929733	0.107233	-0.128599	-0.170781	-0.0581872	0.0346937	0.080939	0.0763741	0.0776023	-0.119754	-0.0555819	0.204445	0.0305244	0.210319	0.0746419	-0.01559	-0.212377	0.078492	0.135983	-0.088341	-0.00792688	-0.0336572	-0.0406065	-0.0814849	-0.0121549	0.103549	-0.0490884	0.182907	0.0755705	0.0468546	-0.179516	0.148606	-0.115716	0.0736	0.119992	0.126885	-0.0217199	-0.137255	-0.116885	-0.0558909	0.0224254	-0.0229092
TaxonAdjustedID.MGS.down.10000000.v6.2311	CAG02254	MGS	NA	-0.0171278	-0.00733051	0.0471567	-0.0351778	-0.0106064	-0.0257934	-0.0418955	0.0889166	0.0246721	-0.0236047	-0.039469	-0.0575182	-0.0542372	0.0146284	0.105278	0.00741856	0.00941884	-0.0360741	0.0233305	0.0983585	0.0271888	-0.104856	0.0284299	0.0204121	-0.00730567	-0.126097	0.00891056	0.103004	-0.0112956	0.0433625	-0.0218759	-0.0132354	-0.0974856	0.039689	-0.0159876	-0.0580588	-0.0533439	-0.035608	0.0171296	0.035638	-0.0646084	0.0253002	0.0824096	-0.00713388	-0.0514898	0.000893194
TaxonAdjustedID.MGS.down.10000000.v6.2319	CAG02262	MGS	NA	-0.0420594	-0.0127566	0.13517	-0.0757797	-0.0560314	0.0762437	0.135127	0.162019	0.0381096	0.0395081	0.0284566	0.016393	-0.0995876	0.0403498	-0.0540224	-0.0966838	0.0744331	-0.0133651	0.082712	0.012953	0.151664	-0.0294141	-0.0106703	0.0723655	-0.0395856	-0.111958	0.137452	0.0458902	-0.00880557	0.00403991	0.0906323	-0.0128562	0.0854962	-0.0382459	0.105107	-0.0413041	-0.0037608	-0.0906039	-0.0828829	-0.0728072	-0.0138772	-0.0565948	0.0958734	-0.0517358	-0.0117459	0.00682455
TaxonAdjustedID.MGS.down.10000000.v6.2320	CAG02263	MGS	NA	-0.0370294	-0.0282474	-0.0214568	-0.0428066	0.0649903	0.0223237	0.0910699	0.0667001	0.0703224	0.0821197	-0.0233894	-0.0115702	-0.0217016	0.0340071	0.000973928	-0.0507558	0.0325044	0.06656	0.0166195	-0.0165378	0.0633981	0.0129759	0.0334007	0.022149	0.0131532	0.0510913	0.0540848	-0.00725458	-0.0163662	0.0205361	0.0830015	-0.0810834	0.142287	0.00432849	-0.0209389	-0.0658782	-0.026864	0.0157649	0.0570236	0.0359939	-0.0789189	-0.0111416	0.0632794	0.00778445	0.00160834	0.106608
TaxonAdjustedID.MGS.down.10000000.v6.2321	CAG02264	MGS	NA	-0.00172728	0.0189712	-0.131045	0.0948663	0.032431	0.106278	0.00129099	-0.0395556	-0.0143313	0.024925	-0.0196229	0.0455017	0.119961	-0.0732169	0.0135484	0.0776182	0.0201098	0.0349782	0.0311208	-0.0292031	-0.00317302	0.096541	-0.0263148	0.029754	-0.0270451	-0.0692496	-0.0466438	-0.0621503	-0.0320343	0.0574793	-0.0600006	0.116509	0.0276852	0.0437989	-0.0222799	0.0555372	0.0806755	0.0693752	-0.00451832	0.144476	0.092466	-0.112787	-0.0307008	0.0145336	0.027275	0.0132463
TaxonAdjustedID.MGS.down.10000000.v6.2322	CAG02265	MGS	NA	0.15806	0.0616644	0.0246131	0.166406	-0.194549	0.0856338	0.101203	0.0862014	0.0778504	-0.084538	0.0146357	0.0242729	0.117786	0.00554917	-0.0549747	0.0826444	0.00390143	0.117615	-0.040826	-0.0399921	0.11734	-0.0284872	-0.0220454	0.0331345	-0.00338482	0.0960195	0.0553261	-0.0356344	-0.00461611	-0.0394804	-0.0169597	0.047023	0.0268384	-0.0496735	0.0083526	0.129089	0.00719696	-0.0998571	0.0190061	0.0636721	-0.0591287	0.00701559	0.109122	-0.0669431	0.156086	0.191039
TaxonAdjustedID.MGS.down.10000000.v6.2327	CAG02271	MGS	NA	-0.0944578	-0.0323381	0.0107512	-0.0579447	0.0486536	0.0510999	-0.0296333	0.0102165	0.0440921	0.0287375	-0.0215135	-0.0153122	0.0611222	0.0912604	0.0220974	0.0212167	0.106848	0.0224875	-0.0337687	0.00277505	0.028809	0.0325279	0.0759787	0.0086307	0.0141703	0.113738	0.042131	0.138264	0.116588	0.115165	-0.0141801	-0.054484	0.21111	0.109901	0.084805	-0.0459589	0.0247252	0.0459498	0.0949587	-0.0607536	-0.00815693	0.0895433	0.0381904	0.068499	-0.0312552	0.114455
TaxonAdjustedID.MGS.down.10000000.v6.2330	CAG02274	MGS	NA	-0.0430166	-0.061742	0.0754116	-0.100055	0.0278443	-0.133784	-0.098677	0.0109358	-0.147319	-0.0545162	-0.133146	-0.0843135	0.017726	-0.0721531	-0.0689064	-0.0566067	-0.0508958	-0.0401866	-0.0992492	-0.0257595	0.0193603	0.0763137	0.030156	-0.0345148	-0.0383073	-0.0617749	-0.102043	0.0987762	-0.0698596	-0.0996938	-0.05716	-0.0270854	-0.0724364	0.0347854	-0.0141368	-0.0239007	-0.139362	-0.0440627	-0.0251922	-0.183338	-0.0089209	-0.00526793	-0.038796	0.0422021	-0.0777271	-0.0821777
TaxonAdjustedID.MGS.down.10000000.v6.2331	CAG02275	MGS	NA	-0.127272	-0.0832062	-0.0838823	-0.110871	0.196297	-0.162653	-0.247863	-0.172287	-0.132155	0.0804797	0.011924	-0.139075	-0.135138	-0.00307752	-0.0296806	-0.0262391	0.00558762	-0.0519007	-0.031567	0.00808165	-0.183713	0.0567974	0.0535443	-0.208341	-0.0368458	-0.0741462	0.0170443	-0.00149436	-0.0296636	0.0385952	0.0169355	0.00965164	0.00311759	0.0882067	-0.136929	-0.0495833	-0.0113413	0.0746065	-0.0142715	-0.0307529	-0.019809	-0.0709197	-0.164135	0.0547443	-0.101015	-0.0789183
TaxonAdjustedID.MGS.down.10000000.v6.234	CAG00223	MGS	Bacteria;Firmicutes;Clostridia;Clostridiales;Peptostreptococcaceae;Romboutsia;Romboutsia timonensis	0.118064	0.153881	0.0221878	0.0624243	-0.0857812	0.239323	0.110124	0.0590546	0.0324443	0.0825691	0.170282	0.182953	0.0838975	0.0254839	0.0980021	0.0572533	0.0245705	-0.0668534	0.121924	-0.0743633	0.0507976	0.0594445	0.0670524	-0.00973581	0.0365201	0.0626335	0.0639967	-0.07678	0.0119465	0.0597139	-0.0706747	0.138984	0.0763188	0.153462	-0.00360163	0.179034	-0.00780089	0.0559981	0.103833	0.103997	-0.0530643	-0.0129182	0.116843	-0.0627274	0.105698	0.0270413
TaxonAdjustedID.MGS.down.10000000.v6.2347	CAG02293	MGS	NA	0.116098	0.111241	0.0673992	0.124421	-0.193873	0.11473	0.0902506	0.0773225	0.0976065	-0.0182424	0.0999719	0.0971238	0.0866195	0.0276491	-0.00789711	0.00438738	0.0101608	0.0486655	-0.0106789	0.0025888	0.0245508	-0.110998	-0.0347088	0.00276668	-0.0464346	0.0480809	-0.0104995	-0.0464517	0.0790275	-0.00803553	-0.0152628	0.143649	0.0584514	-0.0984739	0.0865456	0.125805	0.0535033	0.0497246	0.0431523	-0.0209504	-0.0838747	0.0975492	0.0883221	0.0311884	0.103437	0.0868839
TaxonAdjustedID.MGS.down.10000000.v6.2357	CAG02302	MGS	NA	0.0613503	-0.00668995	-0.0277871	0.0473766	-0.0210106	0.00566078	0.165334	0.0205396	0.0787417	-0.000580306	-0.0836323	-0.0145653	0.0493277	0.0523324	-0.00212948	0.0485412	-0.0786166	0.0501378	0.011372	-0.0380352	0.0508201	0.0714142	-0.133829	0.198311	-0.0723398	0.087795	0.0375875	0.0620127	-0.0417777	-0.0238362	0.0303219	-0.0559869	-0.042171	-0.0733143	0.118685	-0.0795051	0.0755336	-0.0971082	0.035672	0.0801872	-0.0163327	0.0895631	0.133566	-0.0178819	0.0870267	0.0261069
TaxonAdjustedID.MGS.down.10000000.v6.2358	CAG02303	MGS	NA	0.0873906	-0.0232	0.0909375	-0.0267148	-0.0625208	-0.00824666	-0.0369036	-0.107989	-0.0489155	0.0383974	0.022626	0.0718218	-0.0327274	0.0201956	-0.108839	0.0297944	0.00960621	-0.00633031	0.109788	0.0427261	-0.0504656	-0.0698837	-0.114854	-0.126169	-0.010188	0.117268	-0.0522077	0.0156013	0.0286657	-0.00628365	-0.0393834	0.0220994	0.102999	-0.00154006	0.0269117	0.0306171	-0.0289661	-0.0612331	0.0200083	-0.0165804	0.0286421	0.0480733	-0.0590449	0.0129425	0.067188	0.0478998
TaxonAdjustedID.MGS.down.10000000.v6.2361	CAG02306	MGS	NA	-0.0138044	0.0194286	0.344933	-0.127464	-0.210414	-0.0211291	0.0427369	0.0859012	0.102663	-0.0781499	-0.0368834	-0.0621891	-0.0622549	0.203334	0.0266023	-0.189705	0.0322273	-0.0304175	-0.0426527	-0.104189	0.048844	0.126147	-0.000575164	-0.072503	0.0460065	0.102215	0.0686277	-0.075897	0.146593	0.013064	0.0475189	-0.0963896	0.014499	-0.0397358	0.170242	-0.033875	0.0312472	0.0394037	0.0114807	-0.129718	-0.062046	0.0391051	0.0716872	0.0968317	-0.00803536	-0.0563712
TaxonAdjustedID.MGS.down.10000000.v6.237	CAG00353	MGS	Bacteria;Firmicutes;Clostridia;Clostridiales;Eubacteriaceae;Eubacterium;Eubacterium sp. CAG:252	-0.0505824	-0.0323622	0.107571	-0.11201	0.0082996	0.0322041	0.146823	0.166461	-0.00665824	-0.103192	-0.123581	0.0103884	0.000986672	0.0702229	-0.0318052	-0.0341413	-0.0106547	-0.0886273	-0.119513	0.0921152	0.167381	0.0613192	0.0210999	0.0355826	-0.0600083	-0.0499313	0.0244039	-0.00686915	-0.0388691	-0.0968525	0.116109	-0.0704338	0.0585331	-0.138754	0.0909557	-0.177997	0.00307874	-0.0984335	-0.112696	-0.137285	0.0147302	0.0208315	0.173917	-0.0195036	0.0030805	0.109277
TaxonAdjustedID.MGS.down.10000000.v6.2372	CAG02316	MGS	NA	0.00391184	0.103108	0.182884	-0.0218447	-0.15835	0.01773	-0.106881	-0.0948638	-0.0353169	-0.072466	-0.0325384	0.00281999	-0.0579573	0.113036	-0.0622847	0.00554057	0.0995808	-0.0140275	-0.0619234	0.0378079	-0.0376983	0.0901059	0.0523763	-0.205349	-0.0192686	0.0141148	0.0187688	0.00282495	0.098926	0.0203702	-0.0445499	-0.00776962	0.126657	0.139192	-0.00186106	0.0544312	-0.0477307	0.0989955	0.140279	0.0669734	-0.088965	-0.0221088	0.0210358	0.0633894	0.0553097	-0.130084
TaxonAdjustedID.MGS.down.10000000.v6.2373	CAG02317	MGS	NA	0.176927	-0.122463	-0.0197484	0.100524	-0.083322	-0.0262819	0.0134601	0.0793599	0.0693183	0.0365225	-0.135571	-0.0316628	-0.0425262	-0.0678967	0.0493729	0.0954543	-0.0103662	0.0560118	0.0460366	0.0195146	0.0699675	0.000433879	-0.0909559	0.0976578	-0.0579844	0.0289115	-0.0700426	-0.0296573	0.00805901	-0.0814495	-0.0184037	0.00585438	-0.0329058	-0.138564	0.0619294	-0.0122438	-0.0388874	-0.100616	-0.0762846	-0.072828	-0.0559898	0.089156	0.112838	0.00650507	0.0301775	0.096158
TaxonAdjustedID.MGS.down.10000000.v6.2379	CAG00027_4	MGS	NA	0.0263419	0.124592	-0.0382594	0.0609131	-0.0245112	0.0669342	0.00174054	0.05596	0.0248694	-0.0163613	0.011515	0.0598016	0.0754538	0.000127732	-0.0102683	0.0867085	0.0203853	0.0101834	0.0825034	-0.118172	0.00473804	-0.0704325	0.0776642	-0.0031206	-0.00733036	-0.00197145	0.0775106	0.0245522	-0.0243763	0.128762	-0.0453902	-0.00598332	0.0828748	0.121276	-0.00231698	0.0620321	-0.0739803	0.00768527	0.0855941	0.0348873	-0.000386503	-0.0218386	0.0540234	0.0459499	0.0225122	-0.00595976
TaxonAdjustedID.MGS.down.10000000.v6.2382	CAG02325	MGS	NA	-0.0336403	0.0333228	0.0228742	-0.094875	0.0744546	0.043357	-0.0558207	0.00894883	0.0166121	0.0320147	0.101929	0.0147026	0.0509579	0.0493824	-0.0037032	-0.0469457	0.0463287	-0.0446111	-0.0092136	-0.0480732	0.0602645	0.103861	-0.00314422	-0.115489	0.0163824	-0.000356745	0.0241223	-0.0326915	0.0575033	0.0677869	0.0678244	0.0870431	0.0476725	0.0942112	0.0252391	0.0465838	0.0234002	0.109411	0.0468838	0.0156276	0.0274403	0.000219598	0.000167509	0.059723	-0.048546	-0.0495901
TaxonAdjustedID.MGS.down.10000000.v6.2389	CAG02332	MGS	NA	-0.0947476	0.126511	0.0197309	0.0506854	-0.0713449	0.0130447	-0.0801888	-0.0597702	-0.04789	-0.0356929	0.0732132	0.0358619	0.0795498	0.0883993	-0.0044119	0.00514945	-0.0103663	0.0645661	0.0627337	0.00330809	-0.0992994	0.0189201	-0.0669073	-0.100818	0.00779841	0.00348798	0.00970734	-0.0144536	0.0430812	0.102363	0.00803914	-0.048386	-0.0246951	0.0275635	-0.0968059	0.0129639	-0.0565768	0.047914	-0.103411	-0.0686538	0.0195621	-0.040995	0.000165755	-0.0655539	-0.0388013	-0.0559065
TaxonAdjustedID.MGS.down.10000000.v6.2400	CAG02341	MGS	NA	0.17015	-0.0135557	0.0757582	0.0121299	-0.0872604	-0.0491462	0.0184884	0.0316464	0.101706	-0.00125758	0.0307152	-0.0455501	0.0152016	-0.021191	-0.0375093	0.00466665	0.0477541	0.0319986	0.0176757	0.0779569	-0.0670073	-0.0972451	0.0411636	-0.00620874	-0.0209101	0.00518764	0.0453712	0.062266	0.0102562	0.0094334	-0.0678564	0.0118875	-0.0720264	-0.128372	0.0511818	-0.0301233	0.0313121	0.0714055	0.0360518	0.0517559	-0.0219333	0.0157347	0.023324	0.086993	0.00803131	-0.0897736
TaxonAdjustedID.MGS.down.10000000.v6.2414	CAG02354	MGS	NA	-0.114022	-0.0179349	-0.00246225	-0.0923513	0.0969063	-0.0326602	-0.0681182	-0.0554918	-0.0560028	0.0177402	-0.0258296	-0.0211537	0.00288774	0.0265629	0.0393312	-0.0993653	0.0924078	-0.0465874	-0.126399	0.0231874	-0.123615	-0.0429993	0.00409617	-0.0552646	-0.164036	-0.0270308	-0.0558149	0.00431389	0.000849202	0.044241	0.064515	-0.0346988	0.048214	-0.0076763	-0.0239073	-0.0720786	-0.00201366	0.115807	-0.0520742	-0.0164624	0.073464	0.0455374	-0.0417903	-0.00718569	-0.0305417	-0.0231605
TaxonAdjustedID.MGS.down.10000000.v6.2415	CAG02355	MGS	NA	0.0604769	0.0318302	0.0867071	-0.0927221	0.00918305	0.0938645	0.030349	0.109463	-0.0240082	0.065899	0.00239702	0.0513016	0.0195646	-0.0477985	0.0818822	0.000978256	0.0553055	-0.0953005	0.0158469	0.0598171	0.14049	0.0553586	0.0101251	-0.048793	0.030441	0.0389998	-0.0452732	0.0251607	-0.0678479	-0.108562	0.0587837	0.0916786	-0.0339809	0.0146392	0.116695	-0.0289124	0.0369934	0.0116415	0.0341329	-0.10981	-0.00354616	-0.0172101	0.0189975	-0.0417344	-0.0947021	0.133454
TaxonAdjustedID.MGS.down.10000000.v6.2418	CAG02358	MGS	NA	0.189213	-0.0347284	0.068601	0.071214	-0.140631	0.113652	0.171719	0.079267	0.0434629	0.0169392	0.00590227	0.0910514	0.0253922	0.0471637	0.0314388	-0.00321953	-0.0122374	0.0735432	0.115971	-0.0182482	0.131375	-0.0225829	-0.012001	-0.0144634	-0.00221807	0.165044	-0.0525848	0.0270341	0.0751522	-0.0175902	-0.00150803	-0.0183702	-0.0324356	-0.0837472	0.0932664	0.0157672	0.114086	-0.0708138	-0.0237055	0.0236225	-0.0734394	0.114817	0.166944	0.020762	0.162458	0.161684
TaxonAdjustedID.MGS.down.10000000.v6.242	CAG00945	MGS	Bacteria;Bacteroidetes;Bacteroidia;Bacteroidales;Bacteroidaceae;Bacteroides;Bacteroides xylanisolvens	-0.108553	0.00907077	0.0284643	-0.0011455	-0.0269519	-0.0124895	-0.0348564	-0.0338198	-0.0506326	-0.0295468	0.0530436	0.00161124	-0.0721851	0.0322118	0.0297642	0.0510621	0.00465476	-0.0436252	-0.0411555	0.0741368	-0.0419395	-0.0424566	-0.0597277	-0.0994323	-0.107185	-0.0423129	0.04553	-0.0873764	0.0291398	0.0966404	-0.0649522	-0.013867	0.0601785	-0.0575989	0.00557235	0.0465875	-0.0176937	0.0812983	0.01733	-0.0316458	0.0080664	-0.141224	-0.0605809	0.0575823	0.0156667	0.00660395
TaxonAdjustedID.MGS.down.10000000.v6.2426	CAG02365	MGS	NA	0.0505117	0.0567669	0.111151	0.0399519	-0.150692	0.168873	0.0980902	0.123602	0.11704	-0.0550386	0.026419	0.158103	0.103433	0.0758927	-0.0178568	0.0139222	0.0480748	0.0722768	0.0388824	0.0159146	0.113305	0.0384895	0.0695082	-0.03242	0.142329	0.230294	0.00567505	0.108703	0.0782427	0.0196841	0.0173502	-0.00931505	-0.000115849	-0.0171719	0.114699	0.0588938	-0.00377693	-0.0694962	-0.0129857	0.0186157	-0.0480686	0.070664	0.0883941	-0.0321581	0.0326872	0.110667
TaxonAdjustedID.MGS.down.10000000.v6.2437	CAG02376	MGS	NA	0.102183	0.172405	0.00839034	0.229336	-0.242896	0.0603899	-0.0492826	-0.058615	-0.0208198	-0.0862812	0.0350198	-0.00939004	0.126913	0.0880584	0.0184784	0.106967	0.0441395	0.0913411	0.0627722	-0.140515	-0.0301418	0.00569327	-0.0183321	-0.0843217	-0.0274122	-0.0541734	0.0580803	-0.0430669	0.0205368	0.0921014	-0.158467	0.109559	0.0278146	-0.0109199	-0.0360933	0.15681	0.122598	0.040645	0.0943525	0.124691	-0.00673924	-0.0303816	0.00160515	-0.0414203	0.132107	-0.0553023
TaxonAdjustedID.MGS.down.10000000.v6.2445	CAG02384	MGS	NA	-0.166488	0.0199133	0.0117166	-0.1357	0.127241	-0.0104667	-0.0196255	-0.0371691	-0.02843	-0.012692	-0.000868388	0.0127146	0.031718	0.0235721	0.00482774	-0.0832136	0.0633225	-0.0696008	-0.0831187	0.0707985	-0.0826872	0.0445459	0.0169377	-0.0566396	-0.0754441	-0.0289814	-0.121929	-0.0130012	-0.053225	0.0679149	0.156376	-0.0751261	0.00959658	-0.0262444	0.0238009	-0.148378	0.0949704	0.040951	-0.0469209	-0.0662219	0.0521	0.0331931	0.0365607	0.000886972	-0.0643218	-0.0469022
TaxonAdjustedID.MGS.down.10000000.v6.2446	CAG02385	MGS	NA	0.0629112	-0.0511164	-0.0296215	-0.0603034	0.0909562	-0.0812146	-0.0692214	-0.0597006	-0.0798565	-0.122446	-0.071723	-0.073025	-0.0648996	-0.0896493	0.00258882	-0.0468967	-0.0118796	-0.0835736	-0.0233067	0.0320953	-0.059985	0.0818243	-0.0602203	-0.0693386	-0.072502	-0.0693668	-0.0140171	-0.0405023	-0.0923789	-0.0696909	-0.0571105	-0.00848549	-0.00401174	0.00841563	-0.0619652	-0.0533709	0.0631054	0.00366694	0.0124015	-0.0750336	-0.074692	0.0216751	-0.128335	-0.0426894	-0.0154195	0.0115046
TaxonAdjustedID.MGS.down.10000000.v6.2452	CAG50009	MGS	NA	-0.118441	0.0936335	0.0100076	-0.0648252	0.0564269	-0.10971	-0.0608958	0.0169226	0.0254814	-0.0564633	-0.031343	-0.00730866	-0.0232332	-0.0249014	-0.117074	-0.0144718	0.0232694	-0.0508246	-0.064812	0.0684587	0.056224	0.0242015	-0.0615158	-0.110253	0.0751714	-0.0582658	0.0534461	-0.0189581	0.0246651	0.0096149	-0.00620572	-0.0826299	-0.0809649	-0.00960362	0.0274508	-0.0141058	-0.0136467	-0.11246	-0.0984876	0.068462	-0.017339	-0.0680562	-0.0740738	0.0383066	0.00271228	-0.131634
TaxonAdjustedID.MGS.down.10000000.v6.246	CAG00231	MGS	Bacteria;Bacteroidetes;Bacteroidia;Bacteroidales;Odoribacteraceae;Odoribacter;Odoribacter splanchnicus	-0.0203793	-0.10608	0.111751	-0.0975316	-0.0106411	0.0516629	-0.0678354	-0.091349	-0.0940238	-0.00775782	-0.0710871	0.00192968	-0.0234107	0.00384376	0.107025	-0.0923796	0.000610557	0.0453893	0.0370818	0.0795838	-0.0612023	0.109872	-0.0322977	-0.0943322	-0.103954	0.0802661	-0.0811841	0.0226112	0.149801	-0.0588466	0.0567416	-0.0261189	0.0744161	0.0622855	0.00430955	0.00249816	0.0710284	0.0592329	0.040997	-0.141558	0.0390677	0.0382521	-0.0179555	0.0927632	0.0280689	-0.0304
TaxonAdjustedID.MGS.down.10000000.v6.2464	CAG02402	MGS	NA	0.108347	0.043106	0.0919899	0.1636	-0.258249	0.122919	0.0898506	0.0614054	0.0913156	-0.0645306	0.0126245	0.0656198	0.12721	0.0765191	0.0129891	0.0648351	-0.137429	0.103614	-0.0705961	-0.0987973	0.0743149	0.0834798	-0.0773703	-0.0434685	0.00894146	-0.00299568	0.0671193	-0.0660587	0.145963	0.0386217	-0.0227344	0.0480492	0.054506	-0.00505903	0.0218107	0.180738	0.102701	0.0250753	0.104254	-0.0278519	-0.0737571	0.0688541	0.140704	-0.00121478	0.159191	0.0736913
TaxonAdjustedID.MGS.down.10000000.v6.2472	CAG02410	MGS	NA	-0.0683629	-0.0167791	0.0527592	0.0512131	-0.104518	0.0973463	0.0500916	0.0371983	0.0189872	0.0201382	0.0865488	0.0374919	-0.00806593	0.105885	-0.0231036	0.0403511	-0.00616428	-0.0238139	0.0765473	-0.0871008	0.0330932	0.00853391	0.00948248	-0.0325639	-0.119686	0.0018128	0.0918078	0.003356	0.0528131	0.0149099	-0.00573137	0.00423967	0.0865153	0.0280637	0.0197225	0.0602305	0.109453	-0.0265396	-0.0129552	0.0347887	-0.0882528	0.0272909	0.096621	0.107746	0.0255969	0.0337075
TaxonAdjustedID.MGS.down.10000000.v6.2474	CAG02412	MGS	NA	0.0182885	-0.0942164	-0.0819192	0.139884	-0.0621589	0.00197307	-0.0462126	-0.103913	-0.0312541	-0.0409137	0.0816889	0.0136694	-0.0678227	-0.0939252	-0.0310617	0.15231	-0.040085	0.202228	0.0465266	0.0155394	-0.108607	-0.0214297	-0.0446537	-0.0615041	-0.042883	0.0784465	0.0273219	-0.0785052	-0.0122185	0.0287087	0.0255501	0.116139	0.145601	0.0858021	-0.169296	0.142604	-0.00339269	0.0282481	0.0471915	0.0585018	-0.0896747	-0.0593077	-0.00179006	-0.0316657	0.0511034	-0.00719705
TaxonAdjustedID.MGS.down.10000000.v6.2476	CAG02414	MGS	NA	0.0597176	-0.171689	-0.0327299	0.00209057	0.0301998	-0.0605494	-0.00408045	0.0174557	0.00655963	-0.0967377	-0.187574	0.0260351	-0.0642436	0.00157029	-0.0261482	-0.0116752	-0.0355028	0.0462824	-0.0748876	0.00486299	0.00407689	0.0885018	0.00808397	-0.020637	0.0141361	0.0745217	-0.0923333	-0.0182089	-0.0342927	-0.0726367	0.0194227	-0.00604445	0.0435889	-0.02238	-0.0937834	0.00905753	0.00557569	-0.0995447	-0.041513	-0.0924312	-0.0152139	-0.0443703	0.00928395	0.0104798	-0.0411142	0.0270067
TaxonAdjustedID.MGS.down.10000000.v6.2479	CAG02418	MGS	NA	0.0552457	-0.0739813	0.0928034	-0.137593	0.0490613	-0.0838524	-0.0583637	0.0385744	0.0734461	-0.0382777	-0.00934038	-0.12308	-0.0624572	0.014708	0.081313	-0.0421571	0.00215513	-0.0133069	0.00454685	0.0773585	0.0545917	0.0321682	0.0398543	-0.0642639	0.00860365	-0.0252686	0.0133124	-0.0334267	0.0686877	-0.0208602	-0.0657381	-0.0839271	0.0475876	0.0286784	0.0303671	-0.00688491	-0.0305277	-0.0510262	-0.00390314	-0.107282	-0.0833961	-0.031933	-0.037026	0.0060374	-0.0501146	-0.0788205
TaxonAdjustedID.MGS.down.10000000.v6.2483	CAG02422	MGS	NA	0.0516704	-0.00762497	0.0554427	-0.0963452	0.0437798	-0.0628034	0.0906832	0.135139	-0.066899	-0.0855823	-0.0571073	-0.0178064	-0.0369832	-0.0654179	0.0820669	-0.0408845	-0.0332516	-0.113038	-0.0261532	0.0363845	0.127324	0.0128914	0.0114882	0.0982755	0.0857131	-0.0906529	-0.0619382	0.0147836	-0.00655551	-0.0963362	0.0577762	-0.105751	-0.10317	-0.0441309	0.0125309	-0.160722	0.0191729	-0.0456799	-0.0132941	-0.12413	-0.049836	0.0450748	0.0459477	0.0438604	-0.0515367	-0.05808
TaxonAdjustedID.MGS.down.10000000.v6.2485	CAG02424	MGS	NA	0.0132459	0.0469892	0.0457929	0.0255052	-0.0713364	-0.0487465	0.000255787	0.0264285	0.0590875	-0.00179282	0.0999736	-0.0495885	0.0475683	0.0952155	0.0728747	-0.00530349	-0.0502648	0.0182362	-0.00405813	-0.00646832	-0.0766772	0.0874384	-0.0814203	-0.0803097	-0.0624764	0.0319474	-0.0639475	-0.0092283	-0.0110279	-0.0267706	0.0280126	0.0792421	0.0246516	-0.0847172	0.0842739	0.0122029	0.0392674	0.0167405	0.106595	0.0384177	-0.131117	-0.0687733	-0.0361189	-0.00357779	-0.0278482	-0.0618772
TaxonAdjustedID.MGS.down.10000000.v6.2487	CAG02426	MGS	NA	0.0368642	-0.0161466	-0.0880589	0.0448339	0.0411413	-0.124867	-0.0169704	0.0450764	0.0790297	-0.0423597	-0.0436892	-0.0116448	-0.104362	-0.0562542	-0.0818298	-0.0460123	-0.0848986	0.0940467	-0.0798416	-0.0720291	0.0242397	0.102439	-0.0596075	0.00681742	-0.0916127	0.0137745	-0.0300779	0.0547948	0.00448887	-0.0376711	0.0136222	0.0936725	0.00436932	-0.072707	-0.0846296	0.0302502	-0.0722615	-0.0385823	-0.101302	-0.0707547	-0.0972564	0.018883	0.00226993	0.0534906	-0.0198841	-0.0366494
TaxonAdjustedID.MGS.down.10000000.v6.2491	CAG02430	MGS	NA	-0.0541913	0.108341	0.0676071	-0.120361	0.0563288	0.0897269	-0.0718299	-0.0188685	0.0317992	0.0212964	0.0400508	-0.0410192	-0.0241668	0.184449	0.105818	-0.0220531	0.128532	-0.0465291	0.068596	0.0508874	0.00548062	0.000173255	0.0521991	-0.0959551	0.0348338	-0.0927798	0.055728	-0.0803047	0.0632715	0.128398	0.0899896	0.042599	-0.0780367	0.112846	0.0999628	0.0134084	0.086824	0.133143	-0.131581	-0.0392228	0.136223	-0.00582487	-0.0224933	0.113199	-0.0725696	-0.00398053
TaxonAdjustedID.MGS.down.10000000.v6.2497	CAG02436	MGS	NA	0.0642318	0.0983667	-0.0213699	0.0610281	-0.0413162	0.0887595	0.0621847	0.0948056	0.00848452	0.0526552	0.179833	0.0487295	0.0194212	0.0822026	0.0761725	-0.0391241	0.0592935	0.0756367	0.0197303	-0.0587538	0.0882928	-0.0687485	0.0648361	0.0305149	0.0902395	0.082369	0.0689999	0.0994782	0.111235	0.0247747	0.0295047	0.0218352	-0.116043	-0.00779777	-0.00890451	0.0381098	0.0391102	0.0714205	0.0648561	-0.0137803	-0.00576387	0.166637	0.0292275	-0.07168	0.036155	-0.0781248
TaxonAdjustedID.MGS.down.10000000.v6.2500	CAG02439	MGS	NA	-0.0346253	-0.0789377	0.053977	-0.20274	0.154068	-0.0882942	-0.0718833	-0.110953	-0.0226785	0.000336533	-0.126121	-0.0842887	-0.0505677	0.00788998	-0.0132438	-0.115404	0.101142	-0.0951735	-0.0880131	0.120559	-0.0591494	0.114582	-0.0457845	-0.00156255	0.0715002	-0.0528117	0.0133918	0.0728834	-0.0413609	-0.0236637	0.108212	-0.0908157	0.0409275	0.0543293	0.0654874	-0.0721309	-0.00673455	-0.0465241	-0.00588492	-0.146601	0.0623112	0.0265853	-0.00423772	0.0376224	-0.114422	0.0473349
TaxonAdjustedID.MGS.down.10000000.v6.2502	CAG02441	MGS	NA	0.175843	0.0776278	-0.0773567	0.137318	-0.0640424	0.0434112	-0.010554	-0.0604044	0.00958057	-0.0247887	0.11377	-0.000313633	0.133572	-0.0267431	0.00288699	-0.0545133	-0.0394824	0.0607852	-0.0401879	-0.0400963	0.0129225	-0.00608815	-0.00948281	-0.0790595	0.0114036	0.0277453	-0.017514	-0.00843038	-0.0381761	-0.128738	-0.202335	0.0881365	0.0953444	0.0622946	-0.018346	0.069157	-0.0227019	0.0484626	0.0949995	0.0699099	-0.0558606	0.020318	-0.0387307	-0.0754096	0.183	-0.0227906
TaxonAdjustedID.MGS.down.10000000.v6.2503	CAG02442	MGS	NA	-0.0320065	0.00273798	0.283173	-0.141533	-0.135	0.0340513	-0.133441	-0.0850154	-0.0616428	0.0135155	-0.123161	-0.012112	-0.125696	0.0668186	0.0811691	-0.140285	0.136848	-0.136457	-0.0262532	-0.0506927	-0.0422844	0.00435925	-0.00368803	-0.171005	0.0765566	-0.0461253	-0.0772267	0.019392	0.116293	0.039224	0.0434731	-0.0763554	0.0906394	0.0632678	0.147282	-0.0174765	0.0451591	0.0857287	0.0637622	-0.13359	0.0606028	0.0909265	-0.00680339	0.0146438	-0.091577	0.00333544
TaxonAdjustedID.MGS.down.10000000.v6.2506	CAG02446	MGS	NA	0.136502	-0.089775	0.00386727	0.2606	-0.27041	0.00325904	0.0224234	-0.0425364	-0.0265653	-0.146266	-0.00835247	-0.0263974	0.0749678	0.0122651	-0.00870563	0.0256732	-0.138201	0.215714	0.140385	-0.148639	-0.118392	0.0922012	0.0270841	0.0611418	-0.112193	0.0503843	-0.0005587	-0.139386	0.106254	0.0211524	-0.0732555	0.0781733	0.0912772	-0.0492648	-0.0301418	0.14227	-0.0793808	0.14717	0.0803749	-0.0286335	-0.201979	-0.0267677	0.0225961	-0.00809699	0.161413	-0.0920862
TaxonAdjustedID.MGS.down.10000000.v6.2507	CAG02447	MGS	NA	-0.09867	-0.0836882	-0.0124161	-0.0628822	0.0765947	-0.0265346	-0.0104177	-0.0212392	-0.0787061	0.0364531	-0.110215	-0.0209454	-0.0992663	-0.0681644	0.051821	-0.0807195	0.0526566	-0.050113	0.146545	0.124103	-0.0339525	0.109408	-0.0170597	-0.0583271	-0.0279526	-0.0983898	-0.0130041	-0.0940943	-0.0317072	-0.0230573	0.0815137	-0.00451508	-0.0101205	0.0129325	-0.0604028	0.000749603	-0.0218957	0.00100036	0.0244991	-0.0689786	-0.00131711	-0.116072	-0.000447276	0.0354675	-0.0115894	-0.101463
TaxonAdjustedID.MGS.down.10000000.v6.2510	CAG02450	MGS	NA	-0.0661377	0.0388423	0.0707055	0.026883	-0.0973603	0.101175	0.0198044	0.00231991	-0.0306754	-0.0419932	-0.0601138	0.110039	0.114453	0.122036	0.000172027	0.0885837	0.0604732	-0.0623582	0.0479018	-0.0429333	0.032829	-0.0346831	-0.141554	-0.0871582	-0.0515327	-0.119352	0.0191826	-0.00286091	-0.0100857	0.0800211	0.0984252	0.0527232	0.0741587	0.0594837	0.0434233	0.0727498	0.0163693	0.0287288	0.02768	0.0546589	0.0298552	-0.0521246	0.00718572	0.0663943	0.0850264	0.059767
TaxonAdjustedID.MGS.down.10000000.v6.2511	CAG02451	MGS	NA	-0.0704779	-0.0268316	-0.057058	0.0857376	-0.0313324	0.0608503	0.0399089	0.0295568	0.0464862	-0.00268322	0.0186057	0.0143722	0.110481	-0.0249173	0.0495631	0.125828	-0.0160315	0.101954	0.0766138	-0.0322002	0.013494	0.00864529	0.0086194	0.0427151	-0.0445342	0.0359282	0.0777327	0.0830527	-0.00404248	0.13438	-0.0251691	-0.0112634	0.150079	0.0507797	0.00368436	0.028959	-0.0749879	0.0517007	0.106331	0.0512497	-0.00820458	0.0291393	0.121513	-0.00473444	0.0137799	0.0812378
TaxonAdjustedID.MGS.down.10000000.v6.2526	CAG02466	MGS	NA	-0.00487997	-0.0421396	0.0761166	0.000197096	-0.0754077	-0.0689047	-0.0628307	-0.0488496	-0.00986392	-0.0622055	-0.0459116	-0.102408	-0.0255336	-0.018786	-0.06744	-0.0677848	-0.0269028	0.0720523	0.0663266	0.00221581	-0.0453497	-0.0213002	0.0161718	-0.0310033	-0.0149008	0.0320625	0.0765366	-0.0775602	0.0838458	0.0512104	0.0546473	-0.0579991	0.0804577	-0.0659032	-0.0450518	-0.0031633	-0.0397336	-0.0135143	0.00909091	-0.0315402	-0.116538	-0.0230134	-0.0681183	0.0520927	-0.0103441	-0.0670294
TaxonAdjustedID.MGS.down.10000000.v6.253	CAG00238	MGS	Bacteria;Firmicutes;Clostridia;Clostridiales;Lachnospiraceae;Lachnoclostridium;Clostridium saccharolyticum 2	0.0178815	-0.0711214	-0.061168	0.0205731	0.0393903	-0.085586	-0.0736089	-0.0695354	-0.0469847	-0.0590367	0.0719608	-0.0217742	-0.116161	0.0139257	-0.0611331	0.0707743	-0.0265765	0.090824	-0.00155103	-0.0617339	-0.126232	0.0487607	-0.0934184	-0.0405352	-0.00717303	-0.112454	-0.0594184	0.0422227	-0.0351321	0.0361334	0.0483501	0.0327438	0.0815252	0.0658104	-0.0207353	-0.0284137	0.00374511	0.0388734	0.0618705	-0.0387007	-0.0146621	-0.105311	-0.0766384	-0.0608483	-0.0754534	-0.0413324
TaxonAdjustedID.MGS.down.10000000.v6.254	CAG00304	MGS	Bacteria;Firmicutes;Clostridia;Clostridiales;unclassified Clostridiales;unclassified Clostridiales;unclassified Clostridiales	0.194022	-0.124062	0.0319235	0.0507838	-0.0834923	0.0694141	-0.057539	-0.0627837	-0.04462	-0.0427465	-0.025782	0.00635259	0.0884088	-0.0489814	0.0304349	0.0361631	0.00572471	0.0590439	0.0473048	-0.0739774	-0.0490048	0.00538667	0.0770183	-0.0136414	-0.0266471	-0.0499176	-0.0916343	-0.0550226	0.0213107	-0.0799608	0.0435483	0.0720287	-0.00799569	0.0228598	-0.0748528	0.0744792	-0.0185981	0.00362154	-0.0396484	-0.0419294	0.00714598	0.0210461	0.0034418	-0.0303337	-0.0273075	0.0422082
TaxonAdjustedID.MGS.down.10000000.v6.255	CAG00239	MGS	Bacteria;Firmicutes;Clostridia;Clostridiales;unclassified Clostridiales;Flavonifractor;Flavonifractor plautii	-0.184499	-0.136129	-0.0542375	-0.125685	0.182162	-0.172054	-0.225792	-0.158862	-0.11293	0.029737	-0.0661519	-0.149917	-0.162244	-0.069011	-0.0662529	-0.0361794	-0.0288205	-0.0788139	0.0173318	0.0975387	-0.195787	0.0192068	0.0579342	-0.161233	-0.0911271	-0.155775	0.03253	-0.0367881	-0.0733134	0.0306412	0.0171858	0.014804	0.00684068	0.0215097	-0.174583	-0.0913961	-0.0389823	0.119542	-0.033312	-0.0202815	-0.0146182	-0.0443278	-0.151525	0.0423113	-0.16481	-0.101387
TaxonAdjustedID.MGS.down.10000000.v6.2559	CAG02500	MGS	NA	-0.101146	-0.0937799	-0.0676513	-0.124909	0.194622	-0.0502497	0.046922	0.081208	-0.105254	-0.0330515	-0.0315194	0.00778801	-0.111545	-0.0626432	0.111328	-0.0526082	0.0757859	-0.106237	-0.134135	0.052644	0.067425	-0.0211177	-0.0515147	0.0194367	-0.116892	0.0200422	-0.0631347	0.133581	-0.0914274	-0.133343	-0.116236	-0.124374	-0.0620855	-0.000829635	0.0144608	-0.175448	-0.0118606	-0.124867	-0.0202475	-0.111454	0.107172	0.0129906	0.030652	0.0164107	-0.174415	-0.0905959
TaxonAdjustedID.MGS.down.10000000.v6.2561	CAG02502	MGS	NA	0.0891533	0.163462	0.13585	0.0257357	-0.160552	0.167312	0.0303559	0.0904729	0.0806568	-0.017941	0.0117666	0.0622829	0.0817991	0.13738	0.149522	-0.0395934	-0.0246956	0.0420009	0.0277303	0.0230512	0.163621	0.0665796	-0.026527	-0.0292224	0.0446926	0.138717	0.0701346	-0.0501728	0.0825835	0.0386694	-0.0741975	-0.0297131	0.0351218	0.0503449	0.112657	0.06934	0.0991741	-0.0437911	0.003406	0.0242761	0.0115889	0.0545582	0.0478932	0.0342807	-0.00656928	0.0916716
TaxonAdjustedID.MGS.down.10000000.v6.2564	CAG02506	MGS	NA	0.0421551	-0.0352919	0.0943398	-0.100543	0.00964253	-0.0490638	-0.0359862	-0.00981154	0.110176	-0.0535159	-0.0441321	0.00310196	-0.0702594	0.0874308	-0.0240498	-0.0610675	-0.113385	-0.0217266	-0.0865466	0.0384534	0.0229006	0.0668065	-0.0195227	-0.103241	-0.0229793	0.0399515	0.061639	0.107168	0.0568893	-0.106849	-0.0763437	-0.134521	0.00421801	0.0324982	0.0724962	-0.00365588	0.05651	-0.0791327	0.00600824	-0.0625325	-0.026865	0.144308	-0.0351741	0.0335876	0.0377075	0.0177956
TaxonAdjustedID.MGS.down.10000000.v6.2570	CAG02512	MGS	NA	-0.102054	0.0158565	0.204364	-0.0144176	-0.18717	-0.0829434	-0.0911844	-0.0490847	-0.0601814	-0.0030092	-0.0399518	-0.1015	0.0161728	0.100279	-0.0475455	-0.110581	-0.0397982	-0.0402879	-0.00575635	0.0469931	-0.119675	0.0121995	-0.0521913	-0.159666	-0.144743	-0.07644	-0.036193	-0.112176	0.0936225	0.024877	0.0696723	-0.106574	0.0730594	0.0287345	0.0173596	-0.0455785	0.0466177	-0.00140332	0.0236692	0.0452196	-0.0811454	-0.0111863	-0.0174182	-0.0439466	0.00595323	-0.0455218
TaxonAdjustedID.MGS.down.10000000.v6.2579	CAG02521	MGS	NA	0.104922	-0.0127682	0.175703	0.0329939	-0.207353	0.077803	0.10643	0.102873	0.106908	-0.0245294	-0.030891	0.0966035	0.0367822	0.0949239	0.0731611	-0.0372463	0.00649811	0.0880413	0.0928312	-0.056312	0.0982591	0.0618121	-0.0434289	-0.0699449	0.000221341	0.0805993	0.054698	0.0507143	0.0839088	-0.0257359	0.0865117	-0.0330121	-0.0135542	-0.039741	0.110196	-0.000402723	0.138413	0.00257826	-0.0307921	-0.0287497	-0.0652132	0.0106645	0.164308	0.074712	-0.0177759	0.101332
TaxonAdjustedID.MGS.down.10000000.v6.258	CAG00242	MGS	Bacteria;Firmicutes;Clostridia;Clostridiales;Lachnospiraceae;Roseburia;Roseburia sp. CAG:197	0.101227	0.110837	-0.175751	0.222301	-0.0537612	0.114572	-0.0033963	-0.0310365	-0.00782225	-0.0740484	0.0744175	0.0642864	0.268175	-0.043328	-0.0375666	0.0840345	-0.0596018	0.101505	0.0526506	-0.0987322	-0.0422924	-0.123954	0.162838	-0.00102943	-0.000725604	-0.00818139	-0.0487851	-0.152375	-0.0793064	0.0473535	-0.0800391	0.114805	-0.0164071	-0.00725511	-0.0366716	0.128361	-0.0162952	0.0686436	-0.0130835	0.159453	-0.0609136	-0.120649	0.0306661	-0.0914465	0.0842872	0.0373235
TaxonAdjustedID.MGS.down.10000000.v6.2580	CAG02523	MGS	NA	0.176567	-0.0367808	-0.0320186	0.217819	-0.191189	0.0218369	-0.040624	-0.0705204	0.0798576	-0.0417689	0.0253029	0.0225237	0.0480056	0.00289476	-0.0381788	0.0488282	-0.00373582	0.218042	0.0895702	-0.14311	-0.0949923	-0.0467893	0.00114194	0.0140491	-5.05e-05	0.0257622	-0.0356634	0.0272763	0.0132341	-0.0242538	-0.139959	0.0991938	0.195575	0.00724108	-0.0874925	0.146507	0.0264503	-0.0335684	0.00546247	0.082884	-0.0656551	-0.0373098	-0.00452344	-0.0603307	0.112294	0.0279814
TaxonAdjustedID.MGS.down.10000000.v6.2582	CAG02525	MGS	NA	-0.103129	-0.0435181	-0.0602237	-0.0237822	0.0838319	-0.104086	-0.173935	-0.1197	-0.0774458	-0.0509547	0.00299839	-0.068365	-0.124382	-0.117349	-0.0396774	0.0234383	-0.0356248	-0.0656859	-0.0699146	0.0334042	-0.155879	0.0422241	0.0377523	-0.129718	-0.0880668	-0.153191	-0.0127362	-0.0400311	-0.064178	0.0288405	0.00562828	0.0676842	-0.0201027	0.00688088	-0.150297	0.000981318	-0.00482219	0.159236	-0.00592591	-0.00139693	-0.024235	-0.07914	-0.113605	0.038855	-0.148046	-0.062239
TaxonAdjustedID.MGS.down.10000000.v6.2588	CAG02531	MGS	NA	0.0540749	-0.0242351	0.142613	-0.0371797	-0.102872	0.012908	0.00700292	0.0862384	0.0190606	-0.071946	-0.0136872	-0.00232043	0.0143183	0.0110219	0.0346779	0.0446515	0.0175911	-0.0448157	-0.00656062	0.0153124	0.0670452	0.0758556	0.00789438	-0.0781851	0.0227003	0.0627588	-0.0565859	0.0445272	0.0967029	-0.052639	0.0105399	-0.0172314	0.0497809	-0.0448897	0.0874512	0.0542737	0.0376663	-0.0487822	0.0847999	-0.155727	-0.0645799	-0.0763738	0.0461683	0.039824	-0.0640046	0.0343608
TaxonAdjustedID.MGS.down.10000000.v6.2592	CAG02535	MGS	NA	0.0731715	-0.0928001	-0.0657568	-0.0331415	0.0988732	0.00663363	0.000763869	-0.0323725	-0.0758848	-0.0414386	-0.129674	0.0893884	-0.047285	-0.0850806	0.041605	0.00138638	-0.0545854	-0.0342064	0.00533833	-0.0280944	-0.00112827	0.062551	0.0815887	-0.0176606	0.00808154	0.0475165	-0.055899	-0.0298661	-0.0777076	-0.0579575	0.032773	0.0156307	0.0233377	0.0716521	-0.174767	-0.0236418	-0.001031	-0.0565056	-0.134849	0.0140614	0.0784032	-0.0577711	-0.0338604	0.0554486	0.0154872	-0.0484386
TaxonAdjustedID.MGS.down.10000000.v6.2593	CAG02536	MGS	NA	0.0437689	0.114546	0.0530592	0.0480469	-0.101575	0.0200437	-0.00663193	0.00832105	0.0102906	-0.0663995	0.000700501	0.0788611	0.0198643	0.029523	0.073867	0.0587316	0.00595846	0.0709827	0.0541902	-0.00947223	0.0545436	0.0528033	0.0835703	-0.115099	-0.0500646	0.0355231	-0.0204872	-0.0755807	0.0158389	-0.0286418	0.0451057	0.0797591	-0.0343398	-0.0124954	-0.0217308	0.063728	0.000874041	-0.000639186	-0.0625134	-0.130557	-0.0621894	-0.131317	-0.0333387	-0.000676567	0.0554716	-0.171934
TaxonAdjustedID.MGS.down.10000000.v6.2598	CAG02541	MGS	NA	0.112403	0.201605	-0.059929	0.21954	-0.165373	0.111065	-0.0753189	-0.107092	-0.0713643	-0.0609339	0.0528586	0.0492371	0.184216	0.0563782	0.000752681	0.165821	0.0610442	0.06306	0.071139	-0.142548	-0.0917187	0.0342873	-0.00166726	-0.0953756	-0.021573	-0.0157501	0.0301406	-0.0755397	-0.0190544	0.132444	-0.153827	0.122977	0.0217386	0.0568398	-0.0881314	0.181382	0.0566038	0.0593498	0.103365	0.146399	-0.0477901	-0.052694	-0.0445457	-0.0347691	0.118143	-0.0178335
TaxonAdjustedID.MGS.down.10000000.v6.2599	CAG02542	MGS	NA	0.0502581	-0.0187624	0.153198	-0.222402	0.0761468	-0.0579832	-0.049476	0.0557696	-0.0607742	-0.0709616	-0.0645482	-0.0453945	-0.0869156	0.076014	-0.0249525	-0.0674929	-0.0327047	-0.150664	-0.0825474	0.0969668	0.101256	0.132306	0.0957748	-0.136132	-0.0955825	0.154305	-0.0779342	-0.0120492	0.147875	-0.121772	0.133084	-0.110772	-0.0382387	0.00916188	0.093478	-0.0743734	0.0851483	-0.0937105	-0.043081	-0.224714	-0.103169	0.0705437	-0.000926062	0.201064	0.00933049	0.0434402
TaxonAdjustedID.MGS.down.10000000.v6.2602	CAG02545	MGS	NA	-0.0717018	0.050214	-0.0376998	0.0334497	0.00303041	-0.129144	0.0257074	0.0336664	-0.0330025	-0.0971504	-0.0201321	-0.114818	0.0888456	0.000885919	0.0407062	0.0196295	-0.0391122	0.0243581	-0.145806	-0.0488026	0.103031	0.0241758	0.0276348	0.019384	-0.0245923	0.0350453	0.0132429	-0.00623964	-0.132983	-0.132291	-0.107098	-0.161067	-0.0126813	-0.0596764	0.0080654	-0.00486943	-0.0214578	-0.0948194	-0.0241163	0.0411011	-0.104501	-0.0874866	0.0772932	0.0637051	0.0289004	-0.00892757
TaxonAdjustedID.MGS.down.10000000.v6.2604	CAG02547	MGS	NA	-0.0548112	-0.00638707	0.186413	-0.221575	0.0424846	-0.0404997	0.0131443	0.0880813	-0.0271305	0.00455217	-0.0315076	-0.0469031	-0.0162146	0.111648	-0.0102319	-0.201743	-0.0125176	-0.0819448	-0.0655989	0.0409825	0.111075	0.15007	0.0106874	-0.0548096	-0.00401036	0.0503805	-0.079771	0.00724393	0.070678	-0.108507	0.0312561	-0.0527221	-0.00736509	-0.00459917	0.113365	-0.0974409	-0.0204831	-0.0359701	-0.0470221	-0.183214	-0.083598	0.130656	0.0389591	0.109235	-0.150427	-0.0561371
TaxonAdjustedID.MGS.down.10000000.v6.2605	CAG02853	MGS	NA	0.244249	-0.0435697	-0.141896	0.280403	-0.146649	0.0284435	0.0165175	-0.0232307	0.00711923	-0.029552	0.0097999	0.059501	0.152112	-0.109357	0.0211998	0.17498	-0.0550848	0.171798	0.0913908	-0.222369	-0.0290525	-0.032329	-0.0382909	-0.0586732	0.0415283	0.103395	-0.104626	0.053592	-0.12718	-0.107237	-0.0238898	0.144679	0.121752	0.00641862	-0.0595555	0.129584	-0.0733083	-0.0781518	0.145846	0.0361737	-0.127782	-0.120056	0.119789	-0.0326573	0.0124497	0.0572981
TaxonAdjustedID.MGS.down.10000000.v6.2611	CAG02553	MGS	NA	0.0264493	-0.0736356	0.0256325	-0.0181875	-0.00672037	-0.0710626	-0.0336239	-0.0943726	-0.000319858	0.071112	-0.0900745	-0.0418761	-0.0791048	-0.0326328	-0.0550961	-0.0854786	-0.0294578	-0.0108985	0.0949038	-0.0226916	-0.0404876	0.0877686	-0.0176864	0.00793451	-0.00463479	-0.0150022	-0.101161	0.0046768	0.0925448	-0.0811545	0.0315031	0.0169365	0.0665272	0.0227065	-0.101995	-0.106359	-0.0490271	0.059631	-0.0262487	0.0238493	0.00132541	0.0218825	-0.0897679	-0.0346931	-0.0435141	0.0546411
TaxonAdjustedID.MGS.down.10000000.v6.2616	CAG02558	MGS	NA	0.056008	0.0838366	0.120111	0.124171	-0.245698	0.0415711	-0.00665388	-0.0454078	0.0302707	-0.00155621	-0.047717	-0.0358756	0.0276205	0.0410557	-0.0383112	0.0748794	0.0475597	0.05983	0.0785316	-0.0859551	-0.0295186	0.101862	0.0248158	-0.105723	-0.0915946	0.0692877	-0.0481892	-0.0733889	0.0730201	-0.00333479	0.0177142	0.059518	0.0560146	-0.0155287	0.0149374	0.09953	-0.0189147	0.0651316	0.0265885	0.0207072	-0.0736421	-0.128206	0.0493656	0.0638452	0.0782559	-0.0524089
TaxonAdjustedID.MGS.down.10000000.v6.262	CAG00247	MGS	Bacteria;Firmicutes;Clostridia;Clostridiales;unclassified Clostridiales;unclassified Clostridiales;unclassified Clostridiales	0.166511	0.115546	0.0303117	0.129697	-0.162626	0.0825816	0.0773079	0.0354775	0.0467651	-0.0376204	0.00756826	0.00258056	0.191545	-0.0188299	0.0539816	0.0350164	0.0271996	0.10065	0.0362826	-0.0211231	0.120433	-0.0034241	0.0457317	0.0210285	0.0200125	0.0325647	0.0271697	0.0317553	0.10428	0.0112176	-0.0733579	-0.015534	0.00931053	-0.0488359	0.0221252	0.0647093	-0.0978065	-0.00701517	0.0183531	0.141621	0.024865	-0.0265783	0.0958646	-0.0509723	0.0606645	0.0372336
TaxonAdjustedID.MGS.down.10000000.v6.263	CAG00248	MGS	Bacteria;Firmicutes;Clostridia;Clostridiales;Lachnospiraceae;Roseburia;Roseburia sp. CAG:45 & sp. 2789STDY5608886	0.0323737	0.120443	0.0803879	-0.0692172	-0.00861837	0.104797	-0.0115681	0.0563761	0.0442756	-0.0571217	0.104607	0.0473314	-0.0425409	-0.0131938	0.0163686	0.0505044	0.0640959	-0.073962	-0.0468042	0.0852403	0.0207972	0.0257203	0.00420586	-0.0650601	0.138292	0.0512897	0.136835	-0.0359016	-0.0243256	0.0780196	-0.0587799	0.0523355	0.0411555	0.0663669	0.0984979	0.0358061	0.0631934	-0.00780421	0.124148	-0.00923766	0.0854987	-0.0152295	0.0543558	-0.0167223	0.00184385	-0.0544735
TaxonAdjustedID.MGS.down.10000000.v6.2630	CAG02572	MGS	NA	0.171133	-0.0166798	0.102388	0.0745637	-0.17744	-0.000417674	0.117374	0.105149	0.0343416	0.00268404	-0.0377598	0.0308205	0.0404677	0.0333498	-0.0472328	-0.126806	-0.0308058	0.0157111	-0.021401	-0.170323	0.0642417	0.0714533	-0.0940529	0.0403456	-0.104668	0.0361671	-0.0966194	-0.00327602	-0.0257947	-0.0692178	0.0549089	0.0172085	-0.0926038	-0.112477	0.0753235	-0.0304119	0.00172372	-0.0119287	-0.0623536	-0.120478	-0.129892	0.0352578	0.0913343	-0.0951037	0.0260753	-0.00347168
TaxonAdjustedID.MGS.down.10000000.v6.2633	CAG02575	MGS	NA	0.0912427	0.00120007	0.0873813	-0.0754383	-0.00916415	-0.000908664	0.0656092	0.140717	-0.00669216	0.0533015	-0.0185611	0.0945863	0.0240152	0.0040002	-0.00853526	-0.0689041	-0.0403918	-0.0741477	-0.0887835	-0.00229794	0.11338	0.0566332	0.00334871	-0.116679	0.0269807	-0.0172433	0.0248345	-0.0562043	0.04624	-0.117701	0.0134158	-0.0510308	-0.0719323	0.0323649	0.0475881	-0.023332	0.0302388	-0.173639	0.0666898	-0.0564758	-0.0904703	0.181031	0.0368543	-0.0479804	0.0589829	0.0478281
TaxonAdjustedID.MGS.down.10000000.v6.264	CAG00249	MGS	Bacteria;Firmicutes;Clostridia;Clostridiales;Ruminococcaceae;Ruminiclostridium;Clostridium leptum	0.0396051	-0.11987	0.0466365	-0.0652749	0.0206963	-0.0296072	-0.126078	-0.073499	-0.0136321	0.0590684	-0.0831089	-0.079292	-0.000793288	0.0111362	0.030823	0.0322285	-0.0146429	-0.136956	0.0953374	-0.0697158	-0.00611797	0.163001	-0.0313222	-0.143978	-0.122228	0.0327591	-0.0667583	0.0283385	0.0855133	0.0243266	-0.0257273	0.0382768	0.101695	0.111243	-0.0258158	0.0106952	-0.0375446	0.0195493	0.0144604	-0.12383	-0.0583054	0.0439779	-0.00586841	0.074776	-0.0173536	0.0607318
TaxonAdjustedID.MGS.down.10000000.v6.2646	CAG02588	MGS	NA	-0.12577	-0.0566824	0.0157119	-0.196133	0.185116	-0.139198	-0.0973703	-0.0334063	-0.156232	-0.0987852	-0.000533463	-0.103436	-0.129787	0.00579432	-0.0192111	-0.166489	-0.0565044	-0.137454	-0.121576	0.126946	-0.0134713	0.0119959	-0.117092	-0.0783959	-0.108905	-0.0673362	-0.0456084	0.0167476	-0.0770654	-0.113141	-0.0685781	-0.101125	-0.121355	0.007377	0.0294338	-0.1799	0.0125841	0.00151414	-0.0999289	-0.158092	0.00640434	-0.0150482	-0.110548	-0.0449481	-0.0433932	-0.114506
TaxonAdjustedID.MGS.down.10000000.v6.265	CAG00250	MGS	Bacteria;Firmicutes;Clostridia;Clostridiales;Ruminococcaceae;Ruminococcus;Ruminococcus sp. CAG:353 & sp. 2789STDY5834938	0.0828594	0.136715	0.124529	0.0356899	-0.159549	0.150707	0.0251827	0.082009	0.0772061	-0.0281163	0.00161951	0.0612932	0.0633988	0.128781	0.153655	-0.0452643	-0.016227	0.0752691	0.0287617	0.0201027	0.151549	0.064117	-0.0340808	-0.0280139	0.0618004	0.124547	0.0576269	-0.0432406	0.0916567	0.0288723	-0.0843658	-0.0154036	0.0275042	0.0208617	0.100504	0.0762415	0.088453	-0.0483865	-0.0235026	0.0253714	0.00990038	0.0692138	0.0396706	0.0193787	-0.00154871	0.0588009
TaxonAdjustedID.MGS.down.10000000.v6.2656	CAG02598	MGS	NA	-0.0995899	-0.00976643	-0.0739532	-0.0220931	0.0956692	-0.044348	-0.0612326	-0.0543188	-0.0735571	0.110875	0.0906683	-0.00150105	-0.079624	-0.0842694	-0.00359805	-0.0257021	-0.10503	-0.0332832	-0.0224534	-0.00384013	-0.128951	-0.102927	0.0502527	-0.0272394	-0.0104311	-0.101975	0.0288286	-0.0578837	-0.00384399	0.0219058	-0.0675022	-0.0261173	0.0292554	0.052246	-0.0673144	0.0861854	0.00937183	-0.0523138	-0.0162598	0.0268841	-0.0724285	0.0226683	-0.0502431	0.00685348	0.0251278	-0.0265445
TaxonAdjustedID.MGS.down.10000000.v6.2657	CAG02599	MGS	NA	0.162502	0.0211135	0.1022	0.0701573	-0.172747	0.0941086	0.0731675	0.115079	0.0515904	-0.078452	0.1108	0.00209431	0.144013	0.088416	-0.00155455	0.0136823	0.00388748	0.0179469	-0.0622601	-0.0377427	0.0889814	-0.0516271	0.0584808	-0.0019216	0.0479852	0.022961	0.0338799	0.0287832	0.0670295	-0.0229318	-0.0106767	-0.0174399	0.0479405	-0.0394682	0.130824	0.0391387	0.0253801	-0.0225982	0.0668818	0.0165066	-0.0927404	0.00683732	0.132283	-0.0754681	0.0767069	0.0475723
TaxonAdjustedID.MGS.down.10000000.v6.266	CAG00251	MGS	Bacteria;Bacteroidetes;Bacteroidia;Bacteroidales;Rikenellaceae;Alistipes;Alistipes inops == Tidjanibacter massiliensis	0.150175	-0.0846206	-0.0195874	-0.0215771	0.0414259	-0.0256042	-0.0731743	-0.0493521	-0.0146977	-0.100962	0.0196054	-0.0614367	-0.141909	-0.0847438	-0.00497739	0.062993	0.0352649	0.0407122	0.0200319	0.0332357	-0.023883	-0.054995	-0.0484076	-0.0273394	-0.0807548	-0.00842338	0.0129981	0.0261825	-0.026037	-0.0399066	-0.0249825	-0.0708277	0.196132	0.0458802	0.078159	-0.00316391	-0.123616	-0.0439253	0.0611523	-0.11238	-0.00640619	-0.0382519	-0.0180456	0.00646455	0.0273281	-0.0735597
TaxonAdjustedID.MGS.down.10000000.v6.2662	CAG02604	MGS	NA	0.186382	0.00482153	-0.194484	0.268417	-0.0824275	0.0978538	0.0177537	-0.00092165	0.0382622	-0.0388115	0.023762	0.0386475	0.0997747	-0.038376	0.118748	0.130499	-0.0130936	0.123208	0.0896608	-0.177004	0.0356457	0.0324876	0.0499447	0.0105424	-0.0439227	0.166849	-0.0934906	-0.112771	0.00832493	0.00796782	-0.104474	0.109619	0.125976	0.11393	-0.148496	0.168547	-0.112834	0.0162369	0.0334231	0.0336564	-0.0309567	-0.0272235	0.0307036	0.0479622	0.139864	0.0664166
TaxonAdjustedID.MGS.down.10000000.v6.2666	CAG02608	MGS	NA	0.105606	-0.0713373	-0.0970051	0.146566	-0.0540892	0.0058681	0.0856347	0.0163545	0.00295707	-0.0513425	0.0217963	0.0101445	0.142123	-0.0125579	-0.0116417	0.0578116	-0.0464698	0.117599	0.0915154	-0.0745165	0.0865617	-0.0435202	0.0284056	0.0386317	-0.0358351	0.108579	-0.0148951	0.0558462	-0.0537087	-0.0315277	-0.0851704	0.0035448	-0.064996	-0.0509831	-0.0669498	0.0836729	0.00755387	-0.0718728	-0.0616845	0.0389918	-0.0318133	0.0552087	0.0415246	0.025911	0.159427	0.103038
TaxonAdjustedID.MGS.down.10000000.v6.2671	CAG02613	MGS	NA	0.0680268	-0.018259	0.14724	-0.0880505	-0.0554047	-0.05014	-0.0955234	-0.0262942	-0.014887	-0.0647793	-0.0949497	-0.0316275	-0.0894503	0.012602	0.0293978	-0.023517	-0.0394129	-0.0141532	-0.0874913	-0.0186822	-0.022913	-0.050049	0.0182882	0.00211244	-0.0432664	0.0436831	-0.0685717	-0.0273818	-0.0204014	-0.0288224	-0.0080404	-0.12628	0.223864	-0.000807144	0.136562	-0.0248237	-0.0968113	-0.0185799	-0.030861	-0.0966033	-0.0361651	-0.139336	-0.00935014	0.0231987	-0.0311211	-0.0269643
TaxonAdjustedID.MGS.down.10000000.v6.2678	CAG02620	MGS	NA	0.0559961	-0.115783	-0.0970256	0.141896	-0.0492922	-0.0254443	-0.104791	-0.100677	0.0222851	0.103467	0.0350924	-0.0421919	0.0804322	-0.0500999	-0.0949923	0.030892	0.00996126	0.199877	0.0650736	0.0105661	-0.173609	0.0163669	0.0728029	-0.0532098	-0.0190884	-0.0341797	-0.0617905	-0.0345883	-0.026698	0.0467955	-0.0462483	0.0668154	0.0275711	-0.0168965	-0.0569237	0.0659465	-0.0316491	0.135021	0.0478159	0.0783174	-0.0337603	-0.0204758	-0.0498328	-0.0565572	0.0248291	-0.0298248
TaxonAdjustedID.MGS.down.10000000.v6.268	CAG00253	MGS	Bacteria;Firmicutes;Bacilli;Lactobacillales;Streptococcaceae;Lactococcus;Lactococcus lactis subsp. lactis	0.0407822	-0.0867233	0.226069	-0.226683	0.00852684	0.0187344	0.0179449	0.106919	0.0361317	-0.0725862	-0.0661887	0.0371269	-0.0771041	0.0528689	0.136739	-0.0145355	0.124123	-0.047839	-0.021111	-0.00400031	0.0707154	0.116449	0.0717153	-0.0336162	0.180124	0.146654	-0.0887962	0.136919	0.235623	-0.130489	0.0460831	-0.117237	0.0407821	0.0249664	0.200636	-0.116264	-0.00728525	-0.0835682	0.0868092	-0.110456	0.0186738	0.0783196	0.0182132	0.0762222	-0.0194642	0.0524231
TaxonAdjustedID.MGS.down.10000000.v6.2686	CAG02628	MGS	NA	-0.00331697	-0.00898049	0.0589038	-0.0792001	0.022821	-0.120908	-0.00104236	-0.00314046	-0.102014	-0.0639187	-0.00235395	-0.0920584	-0.0136152	-0.0159763	0.0536216	-0.0770077	-0.0983942	-0.069603	-0.0882315	0.0380737	-0.0133276	0.0139606	0.0370402	0.0327745	0.00927541	-0.00972712	-0.113598	-0.107463	0.010939	-0.172624	-0.032443	-0.0649127	-0.000411432	-0.0194297	0.0209316	-0.0680138	-0.0161024	0.0271283	-0.0153524	-0.0847983	-0.107431	-0.0121407	-0.0325612	0.070912	-0.00608444	-0.1029
TaxonAdjustedID.MGS.down.10000000.v6.269	CAG00254	MGS	Bacteria;Firmicutes;Clostridia;Clostridiales;Lachnospiraceae;Blautia;Ruminococcus gnavus	-0.0200497	-0.0684797	-0.0385749	-0.0238115	0.062472	-0.108542	-0.190657	-0.186845	-0.109833	0.0845464	0.0715054	-0.0804565	-0.199912	-0.079657	-0.00470366	0.0335461	0.0176868	-0.0132116	0.0795501	0.0357806	-0.187278	-0.0151169	0.0167903	-0.104889	-0.00022421	-0.107979	-0.0467458	-0.00286426	-0.00103045	0.0342857	0.0246817	0.0471786	-0.0177934	0.0702897	-0.124936	-0.00951783	0.0180071	0.0663358	0.0370936	-0.00109582	0.0207409	-0.0374557	-0.141605	-0.0508165	-0.0272341	-0.0319186
TaxonAdjustedID.MGS.down.10000000.v6.27	CAG00164	MGS	Bacteria;Firmicutes;Clostridia;Clostridiales;Lachnospiraceae;Blautia;Blautia wexlerae	-0.0529935	-0.0567702	-0.0252942	-0.155838	0.18441	-0.1015	-0.157865	-0.0888353	-0.0733545	-0.0195348	-0.0455757	-0.0365536	-0.132711	-0.059374	-0.0492538	-0.0237686	-0.0547534	-0.0869834	-0.00595781	0.0905717	-0.0721439	0.0187312	0.0567799	-0.156458	-0.137993	-0.0531851	-0.0698046	-0.0140956	-0.0546361	-0.0394431	0.0471803	0.020641	-0.0469948	0.0769176	-0.0764016	-0.0573938	0.0181464	-0.0372416	-0.0458428	-0.153939	-0.0492975	0.000258921	-0.108671	0.0252852	-0.0591993	-0.0650026
TaxonAdjustedID.MGS.down.10000000.v6.2707	CAG02649	MGS	NA	-0.152049	-0.0291493	0.0238577	-0.147723	0.127545	0.0274047	-0.0391583	-0.0448332	-0.0286495	0.017819	-0.0138129	0.0375262	0.0355724	-0.0343019	0.0181195	-0.0625282	0.0801876	-0.0924527	-0.0633831	0.0252751	-0.0892431	0.0373276	-0.028997	-0.0461314	-0.0690627	-0.00612621	-0.176729	-0.0157871	-0.00461745	0.0337996	0.171532	-0.0722115	0.057488	0.0355646	0.0277629	-0.113042	0.117065	0.0580414	-0.0147523	-0.0707748	0.126854	0.0635002	0.0372131	0.0142097	-0.120562	0.00399177
TaxonAdjustedID.MGS.down.10000000.v6.2712	CAG02654	MGS	NA	-0.0587445	0.194455	0.085156	-0.0234992	-0.060098	-0.0394813	0.00223659	0.016941	0.048892	-0.0590331	0.0356597	0.0209192	0.0230837	0.0601293	-0.0600675	-0.0246618	0.0115002	-0.0286906	0.0295788	0.0863256	0.0684852	-0.00134767	-0.00383443	-0.0693482	0.0725331	-0.0209637	0.0940513	-0.0473363	0.0180362	-0.0432223	-0.0302726	-0.0308151	-0.0126587	-0.0201923	0.0665039	0.0663156	0.0251504	-0.100097	0.0933356	0.0318199	-0.0123315	-0.0523621	-0.0365953	-0.0169703	0.0907961	-0.138804
TaxonAdjustedID.MGS.down.10000000.v6.2714	CAG02656	MGS	NA	-0.0526859	0.00133088	0.150728	-0.0303138	-0.117914	0.0682832	0.10855	0.112601	0.103105	-0.0773639	-0.0601621	0.0997702	-0.00467868	0.0487412	0.0627824	-0.0960294	-0.0417525	-0.0564796	-0.0927767	-0.0088456	0.0338779	0.0591353	0.0517937	0.0731865	0.0327681	0.0399281	-0.0319897	-0.0295824	0.0913376	-0.0396772	0.032283	-0.105898	0.107162	0.0511027	0.147328	0.0368459	0.0199212	-0.0971908	0.0517004	-0.0919679	-0.0269229	-0.0443421	0.15572	0.0336986	0.00357876	-0.00847015
TaxonAdjustedID.MGS.down.10000000.v6.2718	CAG02660	MGS	NA	0.0482835	-0.065431	-0.0150865	0.135228	-0.123429	0.0929096	0.0799401	0.0375892	0.0431197	-0.147157	-0.0304706	0.0049157	0.0601016	0.0550607	-0.00655448	0.11036	0.0508559	0.0979793	0.0507126	0.0894108	0.0861346	0.0363994	0.0564693	0.0432948	-0.128801	0.0651544	0.108156	0.0360756	0.0686104	-0.00428847	-0.13105	0.00506591	0.120712	0.012374	-0.0252323	0.081668	-0.0254735	-0.0749267	0.0725647	0.0786108	-0.057648	-0.0729171	0.00401331	0.0791949	0.135889	0.0785171
TaxonAdjustedID.MGS.down.10000000.v6.2722	CAG02664	MGS	NA	0.0447958	0.0104881	0.0812418	-0.00410471	-0.0760708	0.114114	0.1116	0.111852	0.0958041	0.0165741	0.0307798	0.099752	0.0778775	-0.0252487	0.080947	-0.0156999	-0.0446148	-0.035421	0.155186	-0.077074	0.132529	0.0793007	0.0602778	-0.0283721	-0.0157855	0.0510018	0.0521039	0.0348137	0.104466	-0.0267082	0.100025	-0.0111002	0.0887468	0.0416259	0.0795681	-0.0232618	-0.0249437	-0.0515364	0.0501293	-0.0687565	-0.0497818	-0.0399511	0.0773953	0.165	0.076744	-0.0225472
TaxonAdjustedID.MGS.down.10000000.v6.2727	CAG02669	MGS	NA	-0.0348963	0.0972217	0.066052	0.0905709	-0.157914	0.0614116	0.114541	0.112739	0.0290094	-0.13357	-0.028403	0.102415	0.0505102	0.207642	0.0967853	-0.0557147	-0.0682235	0.0411256	0.0311408	0.000994568	0.139702	0.0551871	-0.0478264	0.0548581	0.0237839	0.0228721	0.108251	6.05e-05	0.00725124	-0.00137054	-0.0928325	-0.0831429	-0.047578	-0.0331569	0.000189116	0.0249934	-0.143636	-0.0110925	-0.0364847	0.0948592	-0.0482463	0.0846591	0.0797541	0.0817431	0.0958921	-0.034736
TaxonAdjustedID.MGS.down.10000000.v6.2728	CAG02670	MGS	NA	0.0454092	0.0736642	0.159042	-0.0171158	-0.13963	0.0973404	0.0508431	0.107172	0.124874	0.00916357	0.0345095	-0.0307424	0.153552	0.104566	0.0633441	-0.00128677	0.050761	0.0670009	0.0744269	-0.0145486	0.128158	0.000339187	0.0843685	-0.020879	-0.0136013	0.105681	0.136142	-0.026914	0.0682965	0.0061482	-0.00998981	-0.0756099	0.00813791	0.017701	0.109776	0.0404953	0.0143854	-0.00978213	0.0394378	0.0524726	-0.115762	-0.0765155	0.03276	-0.000268785	0.0467096	0.131958
TaxonAdjustedID.MGS.down.10000000.v6.274	CAG00259	MGS	Bacteria;Firmicutes;Clostridia;Clostridiales;unclassified Clostridiales;unclassified Clostridiales;unclassified Clostridiales	0.142532	-0.167459	0.051482	-0.00988442	-0.0407545	0.0557199	-0.0671243	-0.0859921	0.0428344	0.0482184	-0.0314122	0.0401642	-0.000232589	-0.0270081	0.0343564	-0.00871292	0.131783	0.0703827	0.111625	-0.0220904	-0.0112929	0.016848	0.0827259	-0.104668	0.0496709	0.0417823	-0.00887958	0.0150776	0.0483729	-0.0586836	0.0968273	0.0052312	0.0846635	0.063564	-0.017768	0.0554228	-0.0088598	0.095281	-0.0083912	-0.030883	0.0444891	-0.0207219	-0.000193684	0.10942	-0.0117095	0.0841486
TaxonAdjustedID.MGS.down.10000000.v6.2749	CAG02691	MGS	NA	0.0305439	0.100284	0.271417	-0.0848447	-0.181375	-0.05287	-0.0122438	0.0702915	0.0443968	-0.0810527	-0.0933271	0.0701476	-0.13675	0.0886527	0.0537554	-0.135749	0.0273023	-0.0561931	0.00872415	0.0520079	0.0505636	-0.0115881	0.000424902	-0.0766101	0.0345264	-0.0391589	0.003831	-0.0579289	0.0922858	-0.0915392	-0.0262866	-0.130634	0.00245384	0.0144643	0.0975065	-0.00137098	-0.0849635	-0.0572498	-0.0246224	-0.0741765	-0.0616531	-0.064623	-0.0147676	0.004298	0.0796951	-0.106453
TaxonAdjustedID.MGS.down.10000000.v6.2754	CAG02696	MGS	NA	0.171084	0.10827	0.040719	0.113311	-0.156146	0.151783	0.0872525	0.0650561	0.118207	0.00583852	0.0777293	0.0481579	0.156587	0.0291725	0.0397654	-0.0122788	-0.0601565	0.0200863	-0.0345025	-0.10545	0.114808	-0.0198674	0.0426269	0.111753	0.0240378	0.0724367	0.016206	0.0830905	-0.00895929	-0.0398026	0.0248314	0.0382554	0.0120288	0.0584714	0.0392419	0.126181	-0.0877423	-0.0133228	-0.0168634	0.0535578	-0.0861851	0.0113433	0.127442	-0.00289467	0.0611078	0.0789512
TaxonAdjustedID.MGS.down.10000000.v6.2757	CAG02699	MGS	NA	0.0403323	0.076934	-0.086653	0.218253	-0.137652	0.0538288	0.0504121	-0.0544268	4.13e-05	-0.120198	0.0716745	0.0026813	0.133383	0.0596977	-0.00778343	0.0553722	-0.0857015	0.116915	-0.011251	-0.1604	-0.0176272	-0.0101806	-0.0429231	-0.00484388	-0.0445408	0.00635204	0.0743017	-0.108255	-0.117983	0.0777777	-0.0842381	0.0616959	0.0578299	-0.0412735	-0.0305212	0.161974	-0.0246628	0.131117	0.0162478	0.0541844	0.0128394	-0.183691	0.0157961	-0.050653	0.158286	-0.0130766
TaxonAdjustedID.MGS.down.10000000.v6.2758	CAG03004	MGS	NA	0.219893	-0.0537087	0.0365727	0.1018	-0.140275	0.160896	0.279883	0.189477	0.154996	-0.0247558	0.0176942	0.138251	0.15294	0.0212221	0.022849	-0.0017096	-0.0519085	0.107919	-0.0196358	-0.050179	0.232397	-0.0610931	-0.0570776	0.20068	-0.0088573	0.0291896	0.0294397	0.0674888	0.0891583	-0.166128	0.0240087	0.0351321	0.0243284	-0.0375823	0.00380972	0.049684	0.0937224	-0.10435	-0.00313151	-0.0285445	-0.0774811	0.16809	0.17361	0.0653253	0.107065	0.0469573
TaxonAdjustedID.MGS.down.10000000.v6.2764	CAG02705	MGS	NA	-0.0496152	-0.140201	-0.00553401	-0.176194	0.18571	-0.109158	-0.0872134	-0.0616019	-0.0325755	-0.0549002	-0.0709877	-0.121902	0.0220878	-0.0638432	0.0385678	-0.172207	0.0455468	-0.0867616	-0.0474382	0.102252	-0.042848	0.0856753	-0.0613763	-0.0813921	-0.0752359	-0.0150795	-0.0744882	-0.043115	-0.0641886	-0.0542623	-0.0183348	0.0348124	0.0597637	0.0570558	-0.0223318	-0.0714931	-0.0629646	0.0757579	0.0558876	-0.0438476	0.0421393	-0.0646138	-0.0068192	0.112708	-0.14926	-0.0116902
TaxonAdjustedID.MGS.down.10000000.v6.2765	CAG02706	MGS	NA	-0.078493	-0.0471027	0.0347503	-0.0855366	0.0531676	0.068381	0.0358194	0.0118785	0.0457052	-0.0021915	-0.0865262	0.049301	0.0142122	-0.0448664	-0.0625432	-0.00880064	0.0504965	-0.012257	-0.00078563	-0.0112316	0.0886863	0.0939892	0.024345	0.0345473	0.0394931	0.10241	0.0296937	0.0567068	-0.113006	0.0937263	0.0425009	-0.0609968	-0.0094425	0.0420974	-0.0037301	-0.0438301	0.0605032	0.0149378	-0.00573751	-0.0993144	0.0623318	0.00586917	0.0917315	0.0963444	-0.100157	0.0477349
TaxonAdjustedID.MGS.down.10000000.v6.2772	CAG02713	MGS	NA	0.0896522	-0.0998609	0.165156	0.0640356	-0.228687	0.11769	0.0654912	0.0694549	0.101987	-0.0265315	-0.0721878	0.0261923	0.138184	0.0810926	0.0670396	-0.0184355	-0.00868412	0.0431278	-0.0342547	-0.00488247	0.13195	0.00200757	-0.0166111	0.0160457	-0.0414602	0.0371406	0.002505	0.0868877	0.173512	-0.0915103	0.00220652	-0.0976611	0.0598871	-0.042467	0.0468956	0.0508312	0.0538542	-0.0552415	0.0187117	0.0106812	0.0388729	0.131497	0.122737	-0.0108813	0.0466357	0.138079
TaxonAdjustedID.MGS.down.10000000.v6.2773	CAG02714	MGS	NA	-0.01697	-0.0611154	0.0320251	-0.0843471	0.0546433	-0.0102445	-0.0420475	-0.0456576	-0.019887	-0.00404862	-0.0228327	0.00381681	-0.115796	0.0188861	0.0700624	-0.0765463	-0.0971554	-0.0426606	0.0324309	0.111416	-0.00878864	0.00120011	0.059653	-0.0631105	0.00234851	0.0170139	0.0215629	-0.0305381	-0.0390126	0.0324913	0.0481785	-0.0511349	0.116608	-0.0456928	-0.0134249	0.0742081	0.00842492	-0.0746343	-0.0161425	-0.0605491	-0.0428293	-0.0330908	-0.0724936	0.0840385	0.0627873	-0.108475
TaxonAdjustedID.MGS.down.10000000.v6.2779	CAG02720	MGS	NA	0.18677	-0.0381587	-0.013192	0.114781	-0.104385	0.0987546	0.0298094	-0.0206053	0.0187215	0.0418782	0.0159778	-0.000872759	0.17917	-0.0405758	-0.0634206	0.0507322	0.0780584	0.0570001	0.00946623	0.0298983	0.100099	-0.0229169	-0.0590449	0.0434125	-0.109466	-0.00934105	0.0174678	0.0128189	0.0564906	-0.0608289	-0.0876085	0.0418214	-0.0067291	-0.0635217	-0.027564	0.0658287	-0.010096	-0.0543537	-0.00461953	0.0584984	-0.00291241	0.0978402	0.0435832	-0.0286169	0.0656165	0.0935035
TaxonAdjustedID.MGS.down.10000000.v6.278	CAG00265	MGS	Bacteria;Firmicutes;unclassified Firmicutes;unclassified Firmicutes;unclassified Firmicutes;unclassified Firmicutes;Firmicutes bacterium CAG:194	0.137308	0.113438	-0.0182324	0.0592838	-0.0426318	0.0941683	0.106218	0.0568614	0.0486291	-0.00246397	0.0277183	0.0129381	0.0902303	0.0546433	0.0522399	0.0221519	0.0454751	0.00652581	-0.00394393	-0.0798534	0.142269	0.0624647	0.0416321	0.0661452	0.0624382	0.0927744	-0.0544397	0.0158685	-0.0327984	-0.0631688	-0.0626949	0.0263022	-0.0528966	-0.0233979	0.025361	0.0748837	0.00207364	-0.0260717	0.0145119	0.00406932	-0.00036829	0.00550588	0.0474412	0.0111584	0.0770605	0.0138191
TaxonAdjustedID.MGS.down.10000000.v6.2783	CAG02725	MGS	NA	-0.0717209	-0.0569261	0.213903	-0.134225	-0.0740345	0.0364569	0.0793762	0.0967439	0.0682279	-0.0506706	-0.077259	0.025838	-0.0993435	-0.0118554	-0.0119521	-0.0956241	0.0154902	-0.0519565	-0.034456	0.0943441	0.0769456	0.0928798	-0.0265225	-0.0181984	-0.0103943	0.0566401	0.0205197	0.0807007	0.0514003	-0.0194737	0.10011	-0.134667	0.0841208	-0.0416356	0.164114	-0.0655543	0.107309	0.0517702	0.0549059	-0.164251	-0.0770685	-0.0167092	0.18939	0.0348081	-0.109905	0.0747184
TaxonAdjustedID.MGS.down.10000000.v6.2785	CAG02727	MGS	NA	-0.0454527	0.0154276	0.0347277	-0.0487535	0.0155617	0.0675027	0.0127855	0.0492719	0.0644194	0.0017486	0.119042	0.0182264	-0.0612446	0.0730905	-0.0756038	0.0531312	0.0887086	0.0403981	0.0232101	0.0928322	0.0464112	0.00582758	0.0586633	-0.0374584	-0.0179949	0.0686504	0.106525	-0.0569227	0.130451	0.108651	-0.0408908	-0.00953117	0.159767	0.067256	0.0535704	0.0915752	0.0288599	0.0912499	0.00889395	0.0368985	-0.0719663	-0.0105612	0.0123527	0.108493	0.108348	0.0623267
TaxonAdjustedID.MGS.down.10000000.v6.2789	CAG02731	MGS	NA	-0.126051	0.0904471	0.200144	-0.0444941	-0.152233	-0.028952	-0.0549757	0.033285	0.00148624	-0.078178	0.0984165	-0.010632	-0.0444259	0.156853	-0.0273869	-0.193199	-0.00598232	0.000166898	-0.0406534	-0.0651234	-0.00599172	-0.0072056	-0.0150848	-0.114562	-0.0654379	-0.0571847	0.226452	-0.0381768	0.0563343	0.0528357	0.0173119	-0.0793105	0.0343141	0.0119221	0.0811233	-0.00124158	0.0394709	0.111914	-0.0883719	0.00944273	-0.0800735	0.0155627	0.0168935	0.0458955	-0.0157303	-9.4e-05
TaxonAdjustedID.MGS.down.10000000.v6.280	CAG00268	MGS	Bacteria;Firmicutes;Clostridia;Clostridiales;unclassified Clostridiales;unclassified Clostridiales;Firmicutes bacterium CAG:24 / Clostridium sp. 2789STDY5834869 & 2789STDY5834922	-0.080449	0.0839863	0.0321657	-0.0187547	-0.0125952	0.0402617	-0.137867	-0.0440332	-0.0813629	-0.0486427	0.0258397	0.0153098	0.0187093	-0.0476972	-0.0159337	0.0359406	-0.0205386	0.0170493	0.00684983	-0.000365102	-0.0595569	0.0366686	0.00455602	-0.162316	-0.0820026	-0.0865324	-0.0415617	-0.0623441	-0.0434102	0.0992211	0.00569879	0.0568921	-0.00628612	0.143776	-0.022677	0.077609	-0.027371	-0.00141542	0.0334944	-0.0120523	0.0254944	-0.102984	-0.0228752	0.0577237	-0.0412903	-0.0926736
TaxonAdjustedID.MGS.down.10000000.v6.2800	CAG02742	MGS	NA	0.109015	-0.00724462	0.0520822	0.0976911	-0.151395	0.0232317	0.0846933	0.00924112	0.0858926	0.0178228	-0.000797892	0.0102971	0.149185	0.0318161	-0.000631331	0.0913726	-0.114958	0.0129001	-0.023244	-0.134107	0.0649243	-0.0787264	0.0589615	0.0991274	-0.0671003	-0.031321	-0.0738934	0.0735583	0.0446222	-0.0389101	-0.0543273	0.00828274	0.027397	-0.0125078	0.0747883	0.0242987	-0.0374612	-0.115409	0.0259581	0.0495072	0.0362435	0.0458191	0.0783824	-0.0822621	0.0371866	0.0489386
TaxonAdjustedID.MGS.down.10000000.v6.2805	CAG02747	MGS	NA	-0.0593911	0.0440102	0.169821	0.00291735	-0.170773	-0.0488479	-0.112593	-0.180974	-0.0766118	0.0591259	-0.0979867	-0.131539	0.0577674	0.129759	-0.153451	-0.139813	0.028812	0.00505476	0.0686468	0.018087	-0.127617	0.157837	0.0476422	-0.0623137	0.0160364	0.108752	-0.0824772	-0.0403817	0.0448773	-0.0275531	0.0303113	-0.0571925	0.0710102	-0.0450216	0.0683327	0.028921	-0.00851836	0.0692395	0.00901746	0.0628594	0.0167804	-0.065186	-0.0862463	0.0755492	0.00150518	0.0340735
TaxonAdjustedID.MGS.down.10000000.v6.2813	CAG02755	MGS	NA	0.213312	0.129162	-0.0074206	0.136116	-0.131912	0.180586	0.13788	0.110927	0.101258	-0.0207508	0.132565	0.127906	0.0965197	-0.025319	0.0519832	0.118106	-0.0109607	0.151733	0.104746	-0.0267073	0.0333088	0.0325605	0.074782	0.0692576	0.0412166	0.0596352	0.0710118	0.012631	0.0219305	-0.00170341	0.0708131	0.0181675	-0.00824045	0.0357868	0.0808356	0.00236382	0.070329	-0.0186549	0.101668	0.0333151	-0.0486783	0.00438228	0.0843131	0.0248654	0.0564034	0.062333
TaxonAdjustedID.MGS.down.10000000.v6.282	CAG00270	MGS	Bacteria;Firmicutes;Clostridia;Clostridiales;Oscillospiraceae;Oscillibacter;Oscillibacter sp. KLE 1728 & KLE 1745 / Oscillospiraceae VE202-24	-0.131399	-0.183535	-0.0308273	-0.143718	0.177479	-0.156995	-0.167898	-0.160063	-0.101988	0.0119117	-0.134178	-0.0907709	-0.127868	-0.083988	-0.113031	-0.105292	-0.0297236	-0.0470057	-0.015502	0.123945	-0.160015	0.1309	-0.0431995	-0.164462	-0.0695342	-0.0882586	-0.0573094	0.00186937	-0.0246416	-0.0476908	0.0485662	0.0227044	0.0118207	0.0147851	-0.156092	-0.0508541	-0.0350358	0.0548053	-0.0656034	-0.0514403	-0.0251562	-0.0413849	-0.149883	0.07858	-0.10237	-0.0551175
TaxonAdjustedID.MGS.down.10000000.v6.2827	CAG02768	MGS	NA	0.0373337	0.0615822	-0.0267521	0.0236985	0.00218899	-0.0172365	-0.0668043	-0.0265124	-0.0853957	0.0340486	-0.000318322	0.00369692	-0.00726224	-0.0245363	-0.0452398	-0.0587252	-0.0724398	0.132998	0.0850151	0.0107887	0.00503738	-0.072452	0.0170814	-0.0194552	0.070017	-0.0456824	-0.0220052	0.00776484	-0.0963625	0.00946443	0.0408305	-0.00243101	-0.091456	0.019446	-0.123461	0.0536893	-0.044038	-0.019371	-0.052387	-0.0387543	-0.0641378	0.0125092	-0.0349584	-0.0968914	0.0529912	-0.0408769
TaxonAdjustedID.MGS.down.10000000.v6.2828	CAG02769	MGS	NA	0.0205319	-0.0944818	0.0852041	-0.135519	0.0544488	0.0654778	-0.0165431	0.0284009	-0.00493241	-0.100649	0.0187265	-0.027407	0.0446578	-0.0082407	-0.0380493	0.0243719	0.0877135	-0.0624591	0.0759848	0.170332	0.113771	-0.00745334	-0.0275276	-0.0349727	-0.00324553	0.0275598	0.00908994	0.017588	0.110988	0.0184525	0.0183192	-0.0967028	0.130887	0.078784	-0.0195892	0.00206793	0.0139631	-0.0259435	0.0444286	-0.120154	0.0328974	0.0815841	-0.0289379	0.0681544	-0.0444933	0.307488
TaxonAdjustedID.MGS.down.10000000.v6.283	CAG00271	MGS	Bacteria;Firmicutes;Clostridia;Clostridiales;Ruminococcaceae;Ruminococcus;Ruminococcus sp. UNK.MGS-30	0.0331123	0.0575998	-0.0162913	0.0703999	-0.0559212	-0.0319094	0.0153189	-0.0331364	-0.00758122	-0.0570102	-0.0230239	-0.00537786	0.0127296	0.0231393	0.000482972	-0.0555512	-0.0618603	-0.0521098	-0.0725921	-0.146664	-0.0896606	0.0312087	-0.0595615	0.0397638	0.0211542	-0.013664	-0.102908	-0.0204711	-0.0502883	-0.0398738	0.045729	0.0415983	-0.0990401	-0.0901869	0.0794967	-0.0515783	-0.0295111	-0.0530059	-0.0467703	0.0103428	0.0193026	-0.00021612	0.0492921	-0.136651	0.0729226	-0.161481
TaxonAdjustedID.MGS.down.10000000.v6.284	CAG00272	MGS	Bacteria;Firmicutes;Clostridia;Clostridiales;Ruminococcaceae;Faecalibacterium;Faecalibacterium sp. CAG:74	0.185016	0.0246783	0.0564113	0.105118	-0.16327	0.20143	0.148166	0.103044	0.137084	-0.0139745	0.043605	0.103771	0.117772	0.0749564	0.0238994	0.0322129	-0.0377847	0.0521252	0.0205055	-0.045198	0.176084	0.0809653	-0.0186976	0.0238132	-0.0425142	0.122782	0.0179801	0.0464388	0.0749884	0.000629357	-0.0438402	0.0778188	0.00692482	0.0244952	0.048061	0.0880593	0.101875	0.0242953	0.0458665	-0.100616	0.0065816	0.0165078	0.15617	0.0177384	0.123912	0.137509
TaxonAdjustedID.MGS.down.10000000.v6.285	CAG00273	MGS	Bacteria;Firmicutes;Clostridia;Clostridiales;Lachnospiraceae;Fusicatenibacter;Fusicatenibacter saccharivorans	0.0183749	-0.0586595	0.0959402	-0.0422757	-0.0515452	-0.0240964	-0.0907092	-0.0670716	-0.0678359	0.0463207	-0.0395774	-0.0643573	-0.0615821	0.0614163	-0.0214364	-0.0449123	0.00380079	-0.0613363	0.0507984	0.0229855	-0.0926608	0.14553	0.0738201	-0.133701	-0.167836	-0.00346975	-0.0581575	-0.103108	0.0759822	0.00701119	0.00455133	0.0257638	0.0475127	0.00730571	-0.0155612	-0.00474747	0.0125844	0.0847552	-0.0542486	-0.150704	-0.018707	-0.0166041	0.00368074	0.142721	-0.0660912	-0.058061
TaxonAdjustedID.MGS.down.10000000.v6.2858	CAG02800	MGS	NA	0.0642006	-0.100464	0.135138	-0.178979	0.04957	-0.0585293	-0.0745875	-0.0911783	0.0134138	0.0265224	-0.0587398	-0.0754539	-0.116755	-0.0683787	-0.0067881	-0.101717	0.054418	-0.046597	0.0205166	0.0881206	0.0193532	0.0924853	-0.0398958	-0.114646	-0.0210027	0.00361921	-0.0446495	0.0179748	0.154579	-0.141567	-0.0182506	-0.0388577	0.111647	0.0984655	0.0486226	-0.0206356	0.0232473	0.0344976	0.00408117	-0.098608	-0.0802634	0.101638	-0.00533493	0.0182582	-0.0702878	0.0482245
TaxonAdjustedID.MGS.down.10000000.v6.2859	CAG02801	MGS	NA	0.0820008	0.016055	-0.0431836	0.100901	-0.0605526	0.077393	-0.0115872	0.00784653	-0.074987	0.0592642	0.0995342	0.0875332	0.0868852	-0.0576615	0.0287935	0.101827	-0.0113682	0.0871114	-0.0352242	-0.0863903	-0.124094	-0.012346	-0.00912348	-0.0314024	-0.134775	0.0659622	-0.0236565	0.00665326	0.0266169	0.0280726	0.00431983	0.130406	0.0200721	0.0286001	-0.105394	0.0721617	0.113131	0.112135	0.0820343	0.0791278	-0.00501813	0.112205	0.0204252	-0.0748148	0.0434184	0.0426752
TaxonAdjustedID.MGS.down.10000000.v6.2861	CAG02803	MGS	NA	0.0247245	0.0505906	0.0741127	-0.0788449	0.00743069	-0.10441	-0.0939028	-0.0520865	-0.0356291	0.0243569	-0.044666	-0.0612575	-0.0594129	0.0148716	-0.0431474	-0.0902405	-0.0218893	-0.0414118	-0.0317774	0.0857345	-0.0446663	0.0473717	-0.0617557	-0.0450896	0.0117563	-0.0176854	0.0640632	-0.0578371	-0.109942	-0.010818	-7.84e-05	-0.0284794	0.00516429	-0.0658348	-0.0300198	0.0678798	-0.0629673	0.00355919	-0.0309882	0.098135	-0.0877088	-0.0518169	-0.108998	-0.0443549	-0.00508891	-0.00131602
TaxonAdjustedID.MGS.down.10000000.v6.287	CAG00275	MGS	Bacteria;Firmicutes;Clostridia;Clostridiales;Lachnospiraceae;Roseburia;Roseburia faecis	-0.0818687	-0.041592	-0.149699	0.10524	0.0402496	0.0509386	-0.0719118	-0.111764	-0.0701113	0.101692	0.0220295	0.0981692	0.0692634	-0.0362103	-0.00462255	0.0953445	-0.117916	0.0691641	0.0629244	-0.0560325	-0.102642	-0.0141268	-0.042143	-0.097192	-0.0934089	-0.0751563	-0.140818	-0.0171195	-0.0451909	0.0171487	-0.080312	0.177748	0.0942116	0.152623	-0.144212	0.169559	0.00146783	-0.0116464	-0.00729124	0.0298177	-0.0292839	-0.0615589	-0.0687482	-0.0435105	0.0254655	-0.0642276
TaxonAdjustedID.MGS.down.10000000.v6.2873	CAG02815	MGS	NA	0.0322014	-0.212968	0.113289	-0.0619702	-0.0485395	0.00966496	-0.0653866	-0.0426006	-0.0743485	0.0379148	-0.0546802	-0.0814686	0.0510756	-0.0788192	-0.0220842	-0.0663977	-0.00847367	-0.00280452	-0.132465	-0.097749	-0.0489842	0.0398394	0.0669926	0.00805777	-0.00413008	-0.0309016	-0.20056	0.0128887	0.0609797	-0.0147197	0.122923	-0.0255613	0.076063	0.0259484	-0.0192475	-0.0205412	0.0127993	0.0269883	-0.0207586	-0.0731124	-0.0225262	0.0756899	0.0460944	-0.0452357	-0.144529	0.0853431
TaxonAdjustedID.MGS.down.10000000.v6.2889	CAG02831	MGS	NA	0.141283	-0.108559	-0.213351	0.319248	-0.115785	0.0310695	0.027975	0.0344327	0.04112	-0.030938	0.0749406	0.0218833	0.0111806	-0.13917	0.0288777	0.0980216	-0.0714664	0.204882	0.12711	-0.118869	-0.046274	-0.0410882	0.0543043	0.0978863	-0.0110398	0.0601244	-0.0824384	-0.0594022	-0.0298455	-0.00490865	-0.0795365	0.177209	0.0262521	0.00253286	-0.14916	0.129976	-0.0884532	-0.0318413	0.0383355	0.079639	-0.0403657	-0.0224419	0.0217961	-0.0626166	0.0903341	0.0160296
TaxonAdjustedID.MGS.down.10000000.v6.2899	CAG02841	MGS	NA	-0.0766999	-0.0966809	-0.0244689	-0.12445	0.151486	-0.0875169	-0.0740269	0.0426488	0.100345	-0.0840493	-0.0464728	-0.0939778	-0.182209	-0.0254489	0.108965	-0.125444	0.0715395	-0.0333043	0.00691633	-0.0205571	0.120517	0.000283577	0.0419394	-0.12033	0.0519558	-0.0621194	-0.00236758	-0.0138524	0.00999863	-0.0279822	0.0102015	-0.0114941	0.0710548	0.0881511	0.0255471	-0.00191803	-0.0813682	0.00429475	-0.0267663	-0.0362102	-0.0814733	-0.0508617	0.103071	0.0514624	-0.00809452	-0.0713256
TaxonAdjustedID.MGS.down.10000000.v6.29	CAG00036	MGS	Bacteria;Firmicutes;Erysipelotrichia;Erysipelotrichales;Erysipelotrichaceae;Erysipelatoclostridium;Clostridium innocuum	-0.0543833	-0.167366	-0.0038517	-0.084723	0.0904755	-0.121556	-0.104917	-0.152405	-0.0814722	0.0819369	-0.214798	-0.100413	-0.0852465	-0.0320147	-0.089645	-0.0554052	-0.0281411	-0.0630406	-0.0676829	0.061905	-0.142722	0.10082	0.0546404	0.00359713	-0.00889459	-0.0891244	-0.0860645	-0.0040548	-0.00984829	-0.0533022	-0.0725569	-0.00251232	0.0342234	0.0200311	-0.113618	-0.0593585	0.0135522	0.045578	-0.0194271	0.0129034	0.0282134	0.0295067	-0.155908	0.0240774	-0.169967	-0.0685229
TaxonAdjustedID.MGS.down.10000000.v6.290	CAG00278	MGS	Bacteria;Firmicutes;Clostridia;Clostridiales;Lachnospiraceae;Roseburia;Roseburia sp. CAG:380	0.0832784	-0.0600166	0.209681	-0.143377	-0.0605003	-0.0977315	0.040095	0.0699178	0.105486	-0.00473464	-0.096831	-0.10668	-0.0544202	0.148273	-0.0535504	-0.187033	0.0623716	0.00262953	0.0531443	0.0847556	0.116257	0.134908	-0.00614627	-0.0587527	-0.0126301	0.102416	-0.0115153	-0.000632403	0.139704	-0.159173	0.0262909	-0.1564	-0.0291173	-0.108502	0.187539	-0.19024	-0.0815072	-0.0377496	-0.0411385	-0.0859285	-0.0581171	0.120506	0.0548263	-0.00349811	-0.0235447	-0.0134779
TaxonAdjustedID.MGS.down.10000000.v6.2907	CAG02850	MGS	NA	0.114076	0.0760135	-0.105837	0.0497142	0.0537143	0.0785808	0.186274	0.150835	-0.0157331	0.0444782	0.0605851	0.101077	0.10186	-0.0569649	0.0116185	0.0393808	-0.0321491	-0.0108783	-0.0107923	-0.0243451	0.0712028	-0.0255641	0.0313536	0.0597965	0.0499778	0.0503904	0.0352567	0.0687272	-0.00603739	-0.0473022	0.0353887	-0.0628453	-0.155237	-0.0226029	0.0159226	-0.116358	-0.0476714	-0.165557	0.0529678	0.0496624	0.021112	0.107659	0.1023	0.0177167	0.128643	0.0470626
TaxonAdjustedID.MGS.down.10000000.v6.2915	CAG02859	MGS	NA	0.0326749	-0.0490555	0.0594269	0.0781429	-0.138655	-0.086023	-0.00287306	-0.0721258	0.0572438	0.0116079	0.135957	-0.0553395	0.0225796	-0.0555278	-0.062637	-0.0297252	-0.0706581	0.0760488	0.0220839	-0.0777352	-0.113134	0.0307664	-0.1218	-0.114957	-0.0344752	-0.0053448	0.0347169	-0.0169501	0.0132562	-0.0449484	-0.084695	0.0411678	-0.0223812	-0.0956101	0.0337794	0.0283745	0.013308	0.0305068	0.167568	-0.0485955	-0.0597512	0.00920145	0.0492814	-0.0182941	0.134921	-0.099772
TaxonAdjustedID.MGS.down.10000000.v6.2920	CAG02864	MGS	NA	0.0727421	0.0338686	0.0105304	0.119219	-0.132363	0.0897607	0.0760449	0.115568	0.00133095	0.0122962	-0.0502306	0.137531	0.130273	0.0133728	-0.0159028	0.0280095	-0.0102904	0.0346589	-0.0274961	-0.0257976	0.0250228	0.0187453	-0.00135642	0.0133851	-0.0447582	-0.0192608	0.00566383	-0.0477358	0.0684719	0.00458501	-0.0682626	0.0680322	0.139536	0.0210838	0.0354962	0.0767474	-0.0597728	0.00713016	0.103804	0.0344334	-0.0460419	-0.0272266	0.0119355	0.14125	0.06421	0.0732678
TaxonAdjustedID.MGS.down.10000000.v6.2943	CAG02887	MGS	NA	0.0243199	-0.0603287	0.0997981	-0.0779918	-0.0188202	0.0361336	0.0796758	0.0533607	0.0550413	-0.0139182	-0.0881638	0.00476453	0.044121	0.129788	0.0379874	-0.110759	0.0679111	0.00309833	-0.0296476	0.04427	0.126115	0.0485272	0.0104354	0.077916	0.101783	0.0642671	-0.0626964	0.0456282	0.0456449	0.0152552	0.0680168	-0.0497386	0.0558433	0.0335174	0.110091	-0.0404106	0.113441	-0.0396681	-0.0265261	-0.0532132	-0.0230224	-0.00704452	0.111467	-0.0107595	-0.0589439	0.08768
TaxonAdjustedID.MGS.down.10000000.v6.2950	CAG02894	MGS	NA	0.152424	0.123835	0.12122	0.0991919	-0.221241	0.152102	0.11463	0.0400975	0.0869113	-0.081038	0.0869668	0.0771444	0.110425	0.0396703	0.00513643	-0.0114755	-0.0321038	0.012801	1.83e-05	-0.102979	0.0340715	0.00181307	0.06647	0.0351867	-0.0507818	0.0562898	0.104023	0.0526581	0.101433	-0.0454534	-0.0792468	0.0781013	0.0699488	0.0279165	0.0441866	0.135855	0.0512077	-0.0802673	0.0975001	0.00984375	0.0149046	0.108339	0.161852	0.0125284	0.171391	0.119775
TaxonAdjustedID.MGS.down.10000000.v6.2953	CAG02897	MGS	NA	0.132144	0.0319502	-0.198148	0.0713376	0.1228	0.0101464	-0.0335932	-0.106021	0.0121123	0.0873222	0.116792	-0.0129215	0.0603129	-0.107087	0.0372252	0.0292056	0.0882459	0.069068	0.00132854	-0.00281371	0.024579	0.047038	-0.0313707	-0.0403725	0.0249884	0.0311993	0.011158	0.0234868	-0.0208198	-0.0381574	-0.095904	0.110232	0.0507388	0.111733	-0.0781926	0.0656434	-0.0652952	0.00849154	0.062607	0.0104994	0.0733124	0.00313944	-0.0961768	0.0407913	0.135635	-0.00253792
TaxonAdjustedID.MGS.down.10000000.v6.2955	CAG02899	MGS	NA	-0.104474	-0.00726051	0.0647589	0.0776137	-0.143381	0.0516285	-0.0644287	-0.109968	-0.0129247	0.0365788	-0.0404642	-0.0913142	0.131182	0.131146	-0.0867505	-0.127973	0.00382309	0.0808568	0.0924283	-0.0552287	-0.137884	0.0837016	0.101057	-0.0108283	-0.0890014	0.0701461	0.0314411	-0.0223121	0.000715923	0.0998407	-0.0499503	0.0560956	0.0605296	-0.0136353	0.000999281	0.0687049	0.020867	0.0987296	0.016234	0.10683	-0.0506755	-0.0361168	0.0609993	0.086106	0.0351917	0.0619307
TaxonAdjustedID.MGS.down.10000000.v6.2956	CAG02900	MGS	NA	-0.0644021	-0.0251927	0.105865	-0.0246147	-0.0794187	-0.0166359	-0.0301291	-0.0331293	0.0155236	-0.0457142	-0.0378204	-0.0742189	0.0287562	0.0782201	-0.0522663	-0.0643629	0.0263436	0.053423	0.0471823	0.00199963	-0.0110558	-0.0066026	-0.0490629	-0.0406208	0.0164623	0.0192411	0.0734032	-0.0637007	0.0497904	0.0494049	0.101922	-0.0482032	0.0363732	-0.0610804	-0.00100104	-0.0518742	-0.000928507	0.0148816	0.00930227	-0.00322721	-0.0487754	-0.0403036	-0.0306188	0.0349846	-0.0532272	-0.0193114
TaxonAdjustedID.MGS.down.10000000.v6.2965	CAG02909	MGS	NA	-0.103068	0.0110006	0.0829181	0.105007	-0.189347	-0.0766532	-0.113115	-0.0240272	0.0107636	-0.0718598	0.0273045	-0.0126378	0.0237759	0.0770143	-0.0180785	0.0256927	-0.0997184	0.0445709	0.105984	-0.0236671	-0.230682	0.0100029	-0.0283809	-0.0449961	-0.0368869	-0.0426288	0.0033121	-0.0431432	0.0134995	0.0923258	-0.0163864	0.0330158	0.0024785	-0.116024	0.0760123	0.078498	-0.0129729	0.0136926	0.0925701	-0.00420285	-0.118395	-0.0120577	-0.0718066	-0.00250326	-0.0475836	-0.143685
TaxonAdjustedID.MGS.down.10000000.v6.2966	CAG02910	MGS	NA	0.10947	-0.0241841	0.0690533	-0.00739584	-0.0606614	0.00368278	-0.155845	-0.0786027	-0.0867461	-0.000341165	-0.018556	-0.0341344	-0.0614961	-0.086162	-0.0104088	0.015162	0.18259	0.018054	0.0113714	-0.121743	-0.104001	0.0444187	0.0329057	-0.160919	0.0297837	0.0145991	-0.0392743	-0.0642157	0.102245	-0.0239481	0.0926803	0.0385677	0.106178	0.056955	-0.0456829	0.0466662	-0.0310097	0.082421	-0.117123	-0.00191583	-0.00101511	0.0595025	0.0131104	0.014093	-0.035034	0.0571869
TaxonAdjustedID.MGS.down.10000000.v6.297	CAG00284	MGS	Bacteria;Firmicutes;Clostridia;Clostridiales;Lachnospiraceae;Blautia;Ruminococcus sp. Marseille-P328 / Blautia sp. 2789STDY5608844 & sp. 2789STDY5608844	-0.0383731	-0.185046	-0.0457963	-0.121006	0.169035	-0.0352743	-0.111076	-0.109928	-0.0215782	0.0414063	-0.0751212	-0.0817759	-0.0254469	-0.116275	0.0139154	-0.0292406	0.0434964	-0.0551936	-0.00118643	0.0126243	-0.0529725	1.77e-07	0.0737879	0.00951969	-0.0468009	-0.115811	-0.100733	0.0225223	-0.0421879	0.00178591	0.0436215	0.0310166	0.0980442	0.0321685	-0.0475462	-0.0947762	-0.000436334	0.0477847	0.0138378	-0.0241333	-0.0109712	0.0630654	-0.086818	0.0702119	-0.227537	-0.0166173
TaxonAdjustedID.MGS.down.10000000.v6.2980	CAG02924	MGS	NA	0.194308	0.0751542	-0.106527	0.238317	-0.13854	0.118452	-0.0946638	-0.136999	-0.0089459	-0.101038	0.0619365	0.0774366	0.0153995	-0.0755416	0.023884	0.134527	0.0143048	0.105258	0.0558536	-0.114743	-0.080375	0.103325	-0.0370819	-0.10885	-0.0808132	-0.023884	-0.0333286	-0.0153193	-0.0454433	-0.0154236	-0.0383602	0.18997	0.019817	0.0310462	-0.136031	0.161748	-0.0397229	-0.0526948	0.0984755	0.0468978	-0.0622908	-0.00836521	-0.0850378	-0.0384751	0.0847661	-0.0315907
TaxonAdjustedID.MGS.down.10000000.v6.2987	CAG02931	MGS	NA	0.102753	0.195222	0.00837925	0.251567	-0.265627	0.0432746	-0.0720021	-0.0709597	-0.0284721	-0.110215	0.0684604	-0.0234523	0.147694	0.0655809	-0.0053587	0.136186	0.0380561	0.0841394	0.0667731	-0.186018	-0.056517	-0.00404767	-0.0272862	-0.0708288	-0.0114272	-0.0804664	0.0226613	-0.0193006	0.0236174	0.117536	-0.166282	0.133377	0.00150906	-0.011142	-0.0442112	0.161235	0.0979296	0.0668104	0.110654	0.114046	-0.0299658	-0.0347947	0.000559727	-0.0178616	0.134384	-0.0751394
TaxonAdjustedID.MGS.down.10000000.v6.2992	CAG02936	MGS	NA	0.00108208	-0.0119978	-0.0187752	-0.017943	0.036906	0.0301572	-0.0579429	-0.0146275	0.00406603	-0.0419548	0.0698481	-0.00394858	0.0640181	-0.133847	-0.0334822	0.023549	0.059104	-0.0710652	-0.0485561	0.00886852	-0.068023	0.0978493	0.0783389	-0.106853	-0.0716046	-0.0832432	0.0651006	-0.0355228	0.00933134	0.0169954	-0.0320222	0.0409138	-0.0373126	-0.00275127	-0.0571527	0.0245996	-0.0309163	0.104148	0.0250575	-0.0947836	0.046785	0.00967389	0.000514734	0.127933	-0.129282	-0.0625892
TaxonAdjustedID.MGS.down.10000000.v6.2993	CAG02937	MGS	NA	-0.0880931	-0.0404129	0.0900242	-0.134708	0.0488565	0.0397162	0.112593	0.0545713	0.0333946	-0.0560881	0.0222316	-0.00615552	0.049434	0.0925362	0.0130481	-0.278506	-0.0259093	-0.00868157	-0.136896	0.0635621	0.127611	-0.0567419	0.0507453	0.0044308	0.0132972	0.0604444	0.00825876	-0.00555092	0.0301375	-0.05488	-0.00399148	-0.0808381	-0.0370327	0.0186356	0.0237317	-0.0287466	0.0317915	0.021121	0.0239151	0.0112491	-0.0252083	0.0746964	0.0770628	-0.0304292	0.00410568	0.0188526
TaxonAdjustedID.MGS.down.10000000.v6.2994	CAG02938	MGS	NA	0.112033	0.018092	-0.152877	0.112197	0.036273	0.0853025	0.0621117	0.00789539	0.00594546	0.0525385	0.104853	0.112961	0.150505	-0.0676765	0.0766898	0.0427653	0.0375763	0.0381307	-0.0626089	-0.0292473	0.0990453	-0.00485482	0.0783838	0.00331741	-0.000464254	0.0528545	0.107724	-0.0105181	-0.0278912	-0.0697206	-0.099581	0.0275261	0.0239694	0.0782778	-0.129872	0.109823	-0.111625	0.0537804	-0.0133184	0.00500782	0.0642503	0.0544914	-0.0140291	-0.0279206	0.158147	0.0154747
TaxonAdjustedID.MGS.down.10000000.v6.2997	CAG02941	MGS	NA	-0.0281768	0.0129477	-0.00273412	0.0862842	-0.0855656	0.076608	0.0349881	0.0853146	0.171316	-0.0534263	-0.00344856	0.0838901	0.196695	0.0039377	0.0600822	0.0349724	-0.0151791	0.126589	-0.0172071	0.0122738	0.0564771	0.0924524	-0.00539954	-0.0430459	-0.00121851	0.0865566	0.0513721	0.074972	0.103706	0.137518	0.0790756	-0.0329036	0.135024	-0.0253462	0.0814214	0.0442482	-0.0749618	-0.00353888	0.0651592	0.0317088	-0.0146379	-0.00767005	0.0864198	0.0833307	-0.0325117	0.0900323
TaxonAdjustedID.MGS.down.10000000.v6.2998	CAG02942	MGS	NA	0.125161	0.146248	-0.103351	0.0973586	0.00251829	0.084791	0.177063	0.13707	0.002664	-0.0590952	0.107134	0.0558781	0.119654	-0.061858	0.0725636	0.0277237	-0.077922	-0.00265191	-0.00356062	-0.0651696	0.0524299	0.0678328	0.0116186	0.128611	-0.0290018	-6.82e-05	-0.0296539	-0.121352	-0.135858	-0.0226502	-0.14827	0.133467	-0.0615145	-0.0776715	0.0439397	-0.00169093	-0.0408336	0.0705099	0.0512724	-0.0835051	-0.133015	-0.0152047	0.0805598	-0.00277766	0.0111951	0.000122817
TaxonAdjustedID.MGS.down.10000000.v6.3000	CAG02944	MGS	NA	0.0387108	0.00970432	0.057758	-0.00274514	-0.0542588	0.0450909	0.0307734	0.0217169	0.0662275	-0.140756	-0.0757979	-0.0202702	0.0100164	0.0908453	0.1104	-0.105658	0.00710416	0.0283924	-0.0191686	-0.102945	0.110157	0.0817049	-0.156934	-0.0657212	-0.00217837	0.000248401	-0.0802535	-0.0125164	0.0344286	-0.0442066	-0.0390861	-0.0758022	0.0279008	0.047699	0.114837	0.00425368	0.123568	0.0448553	-0.0205153	-0.106989	-0.0218321	0.0236346	0.101216	0.00388348	-0.0249189	0.0457436
TaxonAdjustedID.MGS.down.10000000.v6.3003	CAG02947	MGS	NA	0.128234	0.00281142	0.182844	0.114211	-0.297491	0.0814425	0.0813235	0.161944	0.102972	-0.205407	0.10118	0.011508	0.053429	0.0967117	0.0128462	-0.0647642	-0.00829347	0.0362902	0.099206	-0.153144	0.161088	0.0536409	0.0161577	-0.0378144	-0.0402561	0.0602789	0.104137	-0.120584	0.119007	-0.0555977	0.0596796	0.00633676	-0.0438783	0.0383706	0.0946888	0.0793348	0.0693806	0.0331562	0.0500738	-0.0282144	-0.127434	0.0376565	0.151792	-0.0902596	0.0450265	-0.0598383
TaxonAdjustedID.MGS.down.10000000.v6.3008	CAG02952	MGS	NA	0.116479	-0.111849	-0.0629972	0.00715828	0.0549208	0.0251962	-0.0455137	-0.0804192	0.0273258	-0.0436488	0.0886668	0.00665306	-0.0939036	-0.0751651	-0.0216152	0.0885687	0.0354818	0.0250686	0.0600595	0.0325603	-0.0610683	-0.0123476	-0.0487156	-0.0539834	-0.0593817	0.0618195	0.0644891	-0.0397104	-0.0556001	-0.0688867	-0.0482425	0.0508865	0.215934	0.119055	0.056704	0.0812968	-0.00310904	-0.044696	0.0365297	-0.0748067	-0.061539	-0.0768794	0.00673121	0.074769	0.0928766	-0.0617512
TaxonAdjustedID.MGS.down.10000000.v6.302	CAG00288	MGS	Bacteria;Firmicutes;unclassified Firmicutes;unclassified Firmicutes;unclassified Firmicutes;unclassified Firmicutes;Firmicutes bacterium CAG:95	0.156736	0.0698634	0.166316	0.110199	-0.277058	0.145921	0.140753	0.0816339	0.0918976	-0.0701175	-0.0164056	0.0975096	0.0761339	0.137134	0.017088	-0.00422709	0.0167823	0.0615352	-0.0231333	-0.0373557	0.119998	0.134852	-0.101353	0.00643533	-0.0174788	0.0878762	0.049361	0.015134	0.13102	-0.0602093	-0.0751503	0.000232952	-0.000725537	0.0112462	0.0920425	0.103634	0.154472	-0.0597324	0.107252	0.0157271	-0.0673681	0.0660151	0.171502	-0.00989232	0.178909	0.0747888
TaxonAdjustedID.MGS.down.10000000.v6.3025	CAG02969	MGS	NA	-0.0150007	-0.145969	0.0952749	-0.176137	0.0860491	-0.0482136	-0.0835757	-0.0543835	-0.0785512	-0.0505573	-0.126299	-0.000300645	-0.133265	0.0458289	-0.0392704	-0.148347	-0.00799132	-0.0834067	-0.0548474	0.0862693	-0.0674934	0.0596005	-0.0981933	-0.0812038	0.0613798	-0.0168723	-0.114789	0.0607017	0.103833	-0.0740108	0.0853624	-0.0417209	0.0109381	0.0692504	0.0262692	-0.107523	0.0365879	0.102397	0.0355045	-0.0213503	-0.0641902	0.0530623	-0.0978951	0.0904919	-0.210553	-0.0203165
TaxonAdjustedID.MGS.down.10000000.v6.3026	CAG02970	MGS	NA	0.199217	0.0518022	-0.141981	0.129479	0.00782856	0.133821	0.230255	0.175264	0.0846344	0.0508241	0.00800942	0.0718858	0.128739	-0.0374503	0.0806832	0.115893	0.0256542	0.0907022	0.124619	-0.068277	0.214356	-0.0707295	0.169283	0.149832	-0.0340089	0.123455	0.0711077	0.0273679	-0.0403615	-0.0637542	0.0695865	0.052259	-0.154672	-0.0714767	-0.0951699	-0.0846019	-0.0432827	-0.0817875	-0.0166255	0.117391	0.00559749	0.044546	0.139659	-0.0916183	0.168148	0.0566942
TaxonAdjustedID.MGS.down.10000000.v6.3028	CAG02972	MGS	NA	-0.0372337	-0.106369	-0.208862	0.020143	0.185757	0.0333231	-0.0212889	-0.0100526	0.0149938	0.132966	0.00921253	0.02002	-0.0845094	-0.149055	0.0690209	0.0750625	-0.0113882	-0.0271299	0.0304419	0.00819833	0.0299241	0.0105541	0.195812	0.0928159	-0.0428664	-0.0524986	-0.109543	0.0902313	-0.0240867	0.0230627	0.0510353	0.0467291	0.0375988	0.138573	-0.141061	0.0190126	-0.100811	0.0439451	-0.0345868	-0.0904644	-0.0463809	-0.051617	-0.0989015	0.079567	-0.032471	0.0133458
TaxonAdjustedID.MGS.down.10000000.v6.3031	CAG02975	MGS	NA	0.0283741	-0.0163311	0.107953	-0.0217712	-0.0843904	0.0281959	-0.0631768	-0.0469531	-0.0412132	-0.0540905	-0.147816	0.0199914	-0.100699	0.00536083	0.0345286	-0.0352622	-0.00303791	0.0564509	-0.00583972	-0.0857845	-0.0596305	0.105774	-0.039381	-0.0341295	0.00555145	0.0299363	-0.048895	-0.0503234	0.135517	-0.00535481	0.107819	-0.0528616	0.0330714	0.0774896	0.0774457	0.0169914	0.0985821	0.00836079	-0.0660354	-0.0529714	0.0439327	0.0797826	0.0664356	0.0301093	-0.073389	-0.0175066
TaxonAdjustedID.MGS.down.10000000.v6.3032	CAG02976	MGS	NA	0.0360717	0.0928264	0.119003	0.0496005	-0.168319	0.147897	0.116507	0.131145	0.0763783	-0.0283699	-0.0240963	0.122965	0.0893974	0.147158	0.0317887	0.113366	0.0376285	0.00251827	0.0528398	-0.0105607	0.144284	0.00730297	0.0195295	0.0654953	0.0372079	0.0900753	0.0509113	0.128559	0.0975838	-0.002534	0.000625529	-0.0615864	-0.0373651	-0.0476226	0.13625	0.0120222	0.185227	-0.0591087	0.0527594	0.0865118	-0.0518277	-0.00248768	0.105772	0.056785	0.0412573	0.0913928
TaxonAdjustedID.MGS.down.10000000.v6.3043	CAG02987	MGS	NA	-0.0797373	0.00258703	0.0355169	-0.0635981	0.0299675	0.0815753	0.0152396	-0.0284208	-0.0390851	0.0143837	0.0465843	0.0302245	-0.0809226	0.0319314	0.14422	0.121743	0.0753534	0.0107537	0.0902743	0.0420005	-0.00836897	-0.028127	0.0730111	0.0633125	0.0128505	0.0255857	0.0790581	-0.0251687	0.0826774	0.0314196	0.0576991	-0.0371237	0.126259	0.0788411	0.0417638	0.0589798	0.0206651	0.0382126	-0.0168325	-0.0356818	0.0757291	0.00407142	0.0353951	0.109227	0.0580724	0.0138977
TaxonAdjustedID.MGS.down.10000000.v6.305	CAG00291	MGS	Bacteria;Firmicutes;Clostridia;Clostridiales;Lachnospiraceae;Roseburia;Roseburia intestinalis	0.0437254	0.0213681	-0.0618612	0.075318	-0.0159277	-0.0151186	0.0195268	0.0568593	0.0114681	-0.0622254	0.0365152	0.0754596	0.00572771	-0.0503269	0.0186012	0.0365629	-0.139998	0.0119226	-0.0579714	-0.17812	-0.0240119	0.00441216	-0.000681457	-0.0765584	-0.018523	0.0819103	-0.0127349	-0.148409	-0.0115652	0.0139551	0.00267188	0.0342558	0.0594126	0.0805906	-0.0469456	0.038066	-0.0441309	0.0328198	0.0280701	-0.0205958	-0.133115	-0.0671035	-0.0377069	-0.0721592	0.0426022	-0.0868571
TaxonAdjustedID.MGS.down.10000000.v6.3051	CAG02996	MGS	NA	0.156231	0.0768749	-0.00739477	0.0617824	-0.0558958	0.0957771	0.0907591	0.069254	0.0855264	-0.0129318	0.0130884	0.0878604	0.191631	0.029225	0.0320061	0.128026	-0.0337489	0.0717643	0.0125034	0.0392282	0.040434	0.0217835	0.0549439	0.0115198	0.0465415	0.147399	0.00710158	-4.77e-05	-0.0782073	-0.0134265	0.0249089	0.0926136	-0.00129821	-0.113295	-0.0410907	-0.00415427	-0.101597	-0.0183176	0.112384	-0.030324	0.0501277	-0.0564678	0.0348669	0.036142	0.12492	0.0255815
TaxonAdjustedID.MGS.down.10000000.v6.3052	CAG02997	MGS	NA	0.0069284	0.0880088	-0.0234289	0.0440831	-0.0219475	0.0512377	-0.114263	-0.176479	0.0118921	-0.0357114	0.112409	-0.00859027	0.0399909	-0.0452232	-0.00223497	-0.00693418	0.0366645	0.126377	0.0375767	0.101053	-0.117617	0.0532523	0.0312825	-0.187866	-0.0840755	0.0248273	0.0525479	-0.0999997	-0.0205672	0.0459825	-0.0595659	0.0133889	0.0838372	0.0313966	-0.0247315	0.0824731	0.0941774	0.0374395	0.0122163	0.0548635	0.0248106	-0.00466023	-0.0524085	-0.00962726	0.0869687	-0.00720866
TaxonAdjustedID.MGS.down.10000000.v6.3055	CAG03000	MGS	NA	0.0549454	-0.0193362	0.236981	-0.0965817	-0.135345	-0.028631	0.0723017	0.153678	0.0541166	-0.158891	-0.0399799	-0.020048	-0.0363211	0.0702372	-0.00707432	-0.056325	-0.108214	-0.126493	-0.123148	0.0191117	0.116084	-0.0164284	-0.0151209	0.0260325	0.0213764	0.0199704	0.0115289	0.00190127	-0.0149545	-0.179867	0.0727286	-0.0771651	-0.0909965	-0.0157305	0.128715	-0.00925717	0.0366799	-0.0474023	0.100131	-0.0818785	-0.124064	0.00600536	0.106572	-0.0148754	-0.0577722	-0.00624263
TaxonAdjustedID.MGS.down.10000000.v6.3056	CAG03001	MGS	NA	0.136476	-0.00674244	0.0845703	0.250376	-0.339688	0.0449231	0.0501741	0.0151367	0.0997183	-0.097821	-0.0052556	-0.0394744	0.155942	-0.0262055	0.0117145	-0.0206646	-0.0893057	0.223751	-0.00178138	-0.120711	0.0149039	0.10837	0.0333996	-0.0288533	-0.0428622	0.0634553	0.0604397	-0.0607268	0.0912661	-0.0367716	-0.0709336	0.0637911	0.080409	-0.0729478	0.00444469	0.180087	0.012833	0.0406744	0.130924	0.110951	-0.116912	-0.0214905	0.147926	-0.0256297	0.121761	-0.0115318
TaxonAdjustedID.MGS.down.10000000.v6.3058	CAG03003	MGS	NA	-0.0719228	-0.0964634	0.249765	-0.242257	0.00104611	-0.0283704	0.0318871	0.0165371	0.0437242	0.0691055	-0.180215	-0.0477185	-0.0628843	0.0362149	-2.06e-05	-0.159787	0.142617	-0.0512554	-0.132899	0.0854818	0.0377258	0.192112	0.041682	0.0267544	-0.0830612	-0.0167481	0.0581503	0.0459448	0.0824287	0.047839	0.126679	-0.17118	0.0265766	-0.0263099	0.0460087	-0.123999	-0.0374762	-0.00421131	-0.0929091	-0.0280569	0.000257164	0.060898	0.00986111	0.0986817	-0.155951	0.0528074
TaxonAdjustedID.MGS.down.10000000.v6.3059	CAG03080	MGS	NA	-0.038808	-0.0248943	-0.0288601	-0.115995	0.147175	-0.0745389	0.0359289	0.0247235	-0.0126759	0.0401801	0.0689156	-0.0779848	-0.0583902	0.00792694	-0.0110443	-0.0972444	0.00580236	-0.126268	-0.00172639	0.0104429	0.0844806	-0.032231	-0.035	-0.0165591	0.0182347	0.00733064	-0.0281574	-0.0151724	-0.0412846	-0.0041278	-0.0739384	-0.0536924	-0.0415109	-0.0772418	0.00937453	-0.113051	-0.0430203	0.000706267	-0.142497	-0.0580964	0.0214397	0.0401132	-0.111927	-0.0534159	0.00093812	0.0958259
TaxonAdjustedID.MGS.down.10000000.v6.3062	CAG03007	MGS	NA	0.100359	-0.0190733	0.0163621	0.0949956	-0.113345	0.0685889	0.0829646	0.0535154	0.097114	0.0299371	0.0523923	0.016817	0.0717705	-0.05365	0.0258413	0.0184841	-0.0930049	0.0211588	-0.000830402	-0.0694389	0.0413048	0.00997963	0.108464	0.0430044	-0.0278445	-0.032218	0.0712168	0.035041	0.0964804	-0.0589423	-0.101682	-0.0123252	0.0896755	0.019547	0.026698	0.122326	0.0723875	-0.158989	0.0978705	0.021528	-0.0186059	0.0696524	0.148374	0.0755901	0.110951	0.068511
TaxonAdjustedID.MGS.down.10000000.v6.307	CAG00293	MGS	Bacteria;Firmicutes;unclassified Firmicutes;unclassified Firmicutes;unclassified Firmicutes;unclassified Firmicutes;Firmicutes bacterium CAG:145	0.0500074	-0.172187	0.0368886	-0.100956	0.0668285	-0.0343801	-0.0431748	-0.0192572	-0.0871794	-0.0297748	-0.176583	0.0406602	-0.152395	-0.0446622	1.78e-05	-0.0466119	-0.0535795	-0.0584786	0.0307139	0.0646287	-0.0155078	0.138097	-0.0386798	-0.033552	-0.0243171	0.0463417	-0.118929	0.0493325	0.00793741	-0.0505594	0.0450213	-0.0661133	-0.00260867	0.00810622	-0.0925004	-0.129763	0.0214638	-0.125373	-0.0370186	-0.0702251	-0.000267843	-0.0675349	-0.0628277	0.0607503	-0.0457419	-0.00713973
TaxonAdjustedID.MGS.down.10000000.v6.3074	CAG03019	MGS	NA	0.164008	0.0389994	0.0254765	0.117396	-0.145265	0.210091	0.22406	0.139133	0.10216	-0.0632014	0.0135964	0.148808	0.209819	0.129181	0.06535	0.0728524	0.014526	0.0399218	0.0778602	-0.00711585	0.16053	0.013775	0.0799693	0.115138	-0.0245138	0.087296	-0.0329659	0.0937602	-0.0250508	-0.0187471	-0.0287682	-0.0260816	0.0142029	0.0210303	0.0194024	0.0202431	0.143218	-0.114607	0.0723877	0.0355919	0.0169396	-0.0176197	0.15972	0.0469665	0.032306	0.222214
TaxonAdjustedID.MGS.down.10000000.v6.308	CAG00294	MGS	Bacteria;Firmicutes;Clostridia;Clostridiales;unclassified Clostridiales;unclassified Clostridiales;unclassified Clostridiales	0.142029	-0.132369	0.0131623	0.0711515	-0.0857913	0.0867104	-0.0841154	-0.131643	0.020924	0.084206	-0.0297528	0.0280937	0.1113	-0.0691992	-0.0507019	-0.0149439	-0.0589212	0.0924433	0.139007	0.0172857	-0.0686711	0.115119	0.0302825	-0.121814	-0.0267459	0.102835	-0.0696488	0.0634557	0.0429042	-0.0131993	0.0151949	0.0366335	0.1387	0.0964163	-0.0317178	0.0775384	-0.0511286	-0.035934	0.0893666	-0.00630451	-0.0448478	0.0746968	-0.032458	0.0294605	0.0309216	0.166419
TaxonAdjustedID.MGS.down.10000000.v6.3081	CAG03027	MGS	NA	-0.063421	0.0815989	-0.0260209	-0.0648885	0.0920892	-0.0203564	-0.117415	0.0135856	0.0178402	-0.00812325	0.0755226	-0.0222446	-0.0695243	0.00826942	-0.0023642	0.0570191	0.11963	0.0062535	0.0301229	-0.0981775	0.0275413	-0.035091	0.0849703	-0.0962329	0.0145273	0.0178836	0.00236951	-0.0358509	0.0333437	0.0607359	0.0200749	0.0298359	-0.0200615	0.0965377	-0.047755	0.00548142	-0.0217675	0.0219273	-0.0580571	0.0472258	-0.0306603	0.00852091	-0.104573	0.0789932	-0.105406	-0.104942
TaxonAdjustedID.MGS.down.10000000.v6.3092	CAG03038	MGS	NA	-0.0269442	-0.0609702	0.0557877	-0.102641	0.0498796	-0.199925	-0.127838	-0.129528	-0.106085	0.0464992	-0.131586	-0.172047	-0.147238	-0.0598129	-0.0894224	-0.115771	-0.0926302	-0.0455116	0.00446128	0.023305	-0.145926	0.135175	-0.029858	0.0103266	0.0140862	-0.0849718	-0.104874	0.0826277	0.0611746	-0.070175	0.0900346	-0.0510898	-0.061398	-0.0322711	-0.087825	-0.0851941	-0.00676389	0.00599865	-0.00729406	-0.0391376	-0.0401266	0.115179	-0.124116	0.0137531	-0.149979	-0.0840231
TaxonAdjustedID.MGS.down.10000000.v6.3094	CAG03040	MGS	NA	-0.0957021	0.0388172	0.0976782	0.00760003	-0.104284	0.0410569	0.109803	0.134634	-0.0589687	-0.0260786	-0.0466104	0.0789379	0.0741995	0.0278487	-0.00413039	-0.0382605	-0.11639	-0.00696767	0.0155112	-0.0223862	0.0891653	0.0561953	-0.062463	-0.0269641	-0.0689593	-0.0261485	-0.0865446	-0.0146018	0.0314405	-0.0327051	0.0279936	-0.0849725	-0.0179247	-0.0691115	0.113253	-0.0150274	0.0504581	-0.00725473	-0.0375726	-0.0387905	-0.112276	-0.0134804	0.0672198	0.132951	-0.00515728	0.0351472
TaxonAdjustedID.MGS.down.10000000.v6.3099	CAG03045	MGS	NA	0.0656031	0.0280645	0.128382	0.0942579	-0.22327	0.0812998	0.0269929	0.00314261	-0.0117022	-0.0665248	-0.010447	0.0122908	0.0777151	0.131423	-0.02012	0.0753195	-0.014989	0.0289922	0.0952616	0.00869154	-0.0517277	0.116117	0.0542356	0.00160916	-0.0778606	0.0632656	-0.0145257	-0.0210144	0.0133542	-0.010011	-0.0141231	0.0469632	0.0599788	-0.0839501	0.0747829	0.0574602	0.119169	-0.0815896	0.117394	0.140418	-0.0430734	0.0429932	0.0874748	0.014046	0.0409744	0.122703
TaxonAdjustedID.MGS.down.10000000.v6.3108	CAG03054	MGS	NA	-0.0393141	-0.0789812	0.0647282	-0.087715	0.0257768	0.0269125	-0.0162262	0.00462919	-0.0707443	-0.059275	-0.0295963	-0.0277785	-0.112165	-0.0364394	0.112672	-0.0247333	-0.0343402	-0.0866545	0.0686694	0.0458195	0.0431356	0.0574082	0.108195	-0.0960636	-0.0376314	0.0566464	-0.0696709	-0.0430785	0.100751	-0.0680047	0.0444346	-0.0995594	-0.0037134	0.0167424	-0.0185947	-0.0386218	0.0797022	-0.0685093	-0.0266945	-0.141302	-0.0537089	-0.0456437	0.00668783	0.106407	-0.0192927	-0.0247424
TaxonAdjustedID.MGS.down.10000000.v6.311	CAG00297	MGS	Bacteria;Firmicutes;Clostridia;Clostridiales;Ruminococcaceae;Faecalibacterium;unclassified Faecalibacterium	0.151543	0.0523122	-0.124195	0.429754	-0.31692	0.147168	0.148085	0.0733759	0.0857169	-0.149135	0.16548	0.124806	0.204307	-0.0172516	-0.0292718	0.151389	-0.209388	0.25578	0.112845	-0.162615	-0.00625465	-0.0620287	0.0360657	0.045741	-0.0444031	0.0680042	0.0072991	-0.146012	-0.0338996	0.0307776	-0.199106	0.192474	0.021357	-0.0792274	-0.0223459	0.207447	-0.0609144	-0.0171595	0.111284	0.144406	-0.131148	-0.0738038	0.145243	-0.0856093	0.250654	-0.0537216
TaxonAdjustedID.MGS.down.10000000.v6.3110	CAG03056	MGS	NA	-0.0300888	0.0361574	0.204985	-0.0559036	-0.145345	0.0225953	-0.0110306	0.099741	0.0357109	0.0085742	-0.0358245	-0.0520427	-0.0323505	0.134131	0.0520206	-0.0849986	0.0715473	0.0734419	0.0338106	-0.00466985	0.11657	0.0949893	-0.0709105	-0.111575	-0.00647409	-0.0138573	0.0638916	-0.0313904	0.0150863	0.0450616	0.0591495	0.0217631	0.107645	0.0544254	0.14419	0.0617892	0.0495649	0.0498126	0.0927597	-0.0218147	-0.0614613	0.0123033	0.0773884	0.0199141	0.0152935	-0.137822
TaxonAdjustedID.MGS.down.10000000.v6.312	CAG00298	MGS	Bacteria;Bacteroidetes;Bacteroidia;Bacteroidales;Bacteroidaceae;Bacteroides;Bacteroides intestinalis	0.205131	0.0048275	0.0220018	0.15212	-0.177354	0.0319209	0.100076	0.120266	0.0372237	0.0172702	0.0372472	0.109851	0.0147235	-0.0493789	-0.0413412	-0.05562	-0.0440234	0.0809933	0.00306375	-0.186308	0.0715279	0.0015641	-0.0973812	0.0116338	-0.0810668	0.0555032	-0.0445017	-0.0710077	-0.04409	-0.0564863	-0.013217	0.0838844	-0.113087	-0.0859052	0.0565948	0.0317319	-0.0164699	-0.00205499	-0.0831287	-0.0824202	-0.133245	0.0314578	0.0606396	-0.0707165	0.101252	-0.0657373
TaxonAdjustedID.MGS.down.10000000.v6.3121	CAG03067	MGS	NA	-0.0574003	-0.0205916	0.0483095	0.0376823	-0.0862797	0.0208082	0.112702	0.0776732	0.0441826	-0.040278	0.0908659	0.0576059	0.0487562	0.0573131	-0.0744594	0.018465	-0.061728	0.053994	0.142823	0.00704066	0.0556408	-0.0413432	-0.0705367	0.00209411	-0.115286	0.0183842	0.0340839	0.0133962	0.013654	0.0969286	0.000743946	-0.0434806	0.0207631	-0.0285428	0.00649033	0.053621	0.0399341	0.0744864	-0.0603936	0.0883052	-0.0860915	-0.017308	0.123675	-0.0128599	0.0401385	0.0727765
TaxonAdjustedID.MGS.down.10000000.v6.3123	CAG03069	MGS	NA	0.0929378	0.070569	0.08192	0.100277	-0.183522	0.0782459	0.0987122	0.0532755	0.08349	-0.0508595	0.0354259	-0.0090209	0.156101	0.0195232	-0.0436936	0.0434119	-0.0518584	8.63e-05	0.0149928	-0.0951573	0.0330839	0.0172132	0.0853208	0.0521711	-0.0651165	0.0236119	0.0997227	-0.00111798	0.0471923	-0.0274929	-0.0791223	0.0523907	0.0575438	-0.00132441	0.0120437	0.145508	0.0180732	-0.119161	0.126495	0.0131598	-0.0475318	0.115586	0.156865	0.0622417	0.163442	0.122681
TaxonAdjustedID.MGS.down.10000000.v6.3125	CAG03071	MGS	NA	0.0650987	-0.06147	0.0851225	-0.0103676	-0.0734983	0.050156	0.00228091	-0.0273671	0.0225862	0.00832262	0.00236687	0.0191845	-0.0544439	-0.0250884	-0.00179632	-0.07209	-0.029803	0.0344222	0.0743291	0.0217215	0.00806365	0.00314219	0.0585311	-0.00602301	-0.0495517	0.105924	0.0941442	0.0280964	0.0326167	-0.0256081	-0.0694794	0.0331383	0.0594862	0.0420936	0.0204211	0.0891278	-0.00913133	0.00411097	-0.0691298	-0.0645286	-0.0820144	-0.014086	0.0369062	0.0468087	0.103785	-0.0112901
TaxonAdjustedID.MGS.down.10000000.v6.3126	CAG03072	MGS	NA	-0.0900809	0.0417012	0.066193	-0.113435	0.0506401	0.0229559	-0.0963177	-0.0615306	0.0502523	0.0554052	0.0570029	-0.0355067	0.0357967	0.100209	0.00418563	-0.0406063	0.0142691	-0.0383959	0.029242	0.00437327	-0.00678962	0.099683	0.0449288	-0.0806517	-0.0334679	0.00752754	0.0651278	-0.022864	0.0648105	0.103624	0.0970448	0.0864058	0.0205679	0.12494	0.0239866	0.0631824	0.0426277	0.169819	0.0349633	0.0300988	0.0457072	0.0607425	-0.0423191	0.0673632	-0.0475636	-0.103356
TaxonAdjustedID.MGS.down.10000000.v6.3127	CAG03073	MGS	NA	0.0668101	0.0519708	0.100336	-0.10891	0.0122769	0.0292166	-0.191156	-0.0566795	-0.0473487	0.191779	-0.0227218	0.0412348	-0.0320173	-0.00703974	-0.0197307	-0.0178224	0.0597801	-0.077613	0.0335112	0.0203235	-0.0832185	-0.0950556	0.0829333	-0.166596	0.0346727	-0.00317391	-0.0316527	-0.0406632	0.0443	-0.0159137	0.0447166	-0.0103128	-0.056071	0.103331	0.0322216	-0.00897658	0.0440857	0.0298423	-0.0845316	0.00329823	0.0204561	0.0916231	-0.105881	0.0323036	0.062712	-0.0279284
TaxonAdjustedID.MGS.down.10000000.v6.3129	CAG03075	MGS	NA	-0.0884213	-0.165665	-0.153677	0.0192713	0.132124	0.0520898	-0.0356746	-0.108592	0.0185385	0.0875799	-0.0372643	-0.0354929	0.0414686	-0.047868	0.0365449	0.0709971	0.0995506	0.0522065	0.0993678	0.0157121	-0.138347	0.0628045	0.117538	-0.0461743	-0.0486523	-0.0458947	-0.092152	-0.0205105	0.00956722	0.0218461	-0.0184703	0.10371	0.173156	0.0428146	-0.08273	-0.0348019	-0.0155144	0.13928	0.0175057	0.0507725	0.0019581	-0.048503	-0.0329845	0.108305	-0.0137622	0.0128892
TaxonAdjustedID.MGS.down.10000000.v6.313	CAG00305	MGS	Bacteria;Firmicutes;Clostridia;Clostridiales;unclassified Clostridiales;Intestinimonas;Intestinimonas butyriciproducens	0.039222	-0.0976874	0.0160169	-0.0656033	0.0512855	-0.0731066	-0.0559127	-0.0590723	-0.120094	-0.0253656	-0.125264	-0.12281	0.00157749	-0.0987249	-0.0529634	-0.0471281	-0.0737989	-0.0811635	0.00892515	0.0664302	-0.0744351	0.109054	-0.0626417	0.0344502	-0.0375519	-0.0335279	-0.0481575	0.0389255	-0.0868547	-0.0955951	-0.0141801	-0.0084625	-0.00175738	-0.0167464	-0.100592	-0.0300078	-0.0294793	-0.035812	0.0192976	-0.0729548	-0.0348905	-0.00322745	-0.0563393	0.0444661	-0.119808	0.0274067
TaxonAdjustedID.MGS.down.10000000.v6.3131	CAG03077	MGS	NA	-0.0068751	0.0110271	0.150324	-0.0214333	-0.1266	-0.0479951	-0.0552818	-0.015464	-0.041503	-0.0718375	-0.0627791	-0.0492302	-0.0863343	0.112037	-0.00834763	-0.0285296	-0.0483386	0.0671681	-0.0733929	-0.165694	-0.0171984	0.0512536	-0.00224036	-0.112153	0.0235041	0.101486	-0.0105135	-0.0859165	0.0421415	-0.0554742	-0.0117296	-0.0419108	0.123135	0.0108887	0.0225577	0.0677511	-0.0370726	-0.0228341	-0.0158526	-0.120482	-0.0968578	-0.0762846	-0.0368586	-0.0397855	0.0406439	-0.0319365
TaxonAdjustedID.MGS.down.10000000.v6.3138	CAG03085	MGS	NA	-0.0337576	-0.137594	-0.028773	0.00907201	0.0191483	0.0569679	0.0186682	0.0181933	-0.0016257	0.0460994	-0.0802601	0.0929137	-0.00252858	-0.0367503	-0.0013705	0.00943675	0.0540937	-0.0200848	0.0478209	-0.018578	0.0153881	-0.00778709	0.135411	-0.0377181	-0.00232854	0.031127	-0.0896264	0.0839073	0.0545036	0.0569429	0.139904	-0.0430325	-0.0177439	-0.0161844	-0.0375817	-0.0996552	-0.0622489	-0.0167505	0.0180895	0.037565	0.084094	0.0456911	0.0969229	0.0466849	-0.105088	0.00983872
TaxonAdjustedID.MGS.down.10000000.v6.3146	CAG03093	MGS	NA	0.129187	0.103134	-0.0199657	0.222281	-0.207662	0.101913	0.0800131	0.0898602	0.0272037	-0.14687	0.0646864	0.0825407	0.135641	-0.0329057	0.0954029	0.105214	-0.0796945	0.0515182	0.0499813	-0.121718	0.0103204	-0.0369904	0.0566044	0.0161794	-0.00180195	0.0903787	0.00915163	-0.0949694	0.0237258	-0.00675858	-0.0122156	0.107412	-0.0283346	-0.116205	-0.0843464	0.0952968	0.0446878	0.0127305	-0.0363645	0.0583645	-0.0231316	-0.112276	0.121856	-0.0331934	0.178303	-0.029926
TaxonAdjustedID.MGS.down.10000000.v6.3148	CAG03095	MGS	NA	0.114378	0.124999	-0.12658	0.210749	-0.0905269	0.101978	0.00106324	0.00219482	-0.0221305	-0.115889	0.0351713	0.0737183	0.166021	0.0469336	-0.0541394	0.0819344	-0.077506	0.0391949	0.0453997	-0.043877	-0.0401729	-0.0938106	0.0945216	0.00307422	-0.00393917	0.0221045	-0.0493364	-0.159297	-0.0748584	0.0441436	-0.0746129	0.0188997	-0.0453597	0.0146779	-0.019474	0.112898	0.0234795	-0.00806456	-0.0301387	0.142585	-0.117505	-0.118857	0.0536836	-0.0995964	0.138322	0.0344895
TaxonAdjustedID.MGS.down.10000000.v6.3149	CAG03096	MGS	NA	0.0281864	0.071568	-0.0689791	0.187312	-0.123462	0.0575153	0.0693583	0.0646036	0.0827275	-0.0782882	0.0590402	0.062947	0.209773	-0.0277512	0.124888	0.0823201	-0.112791	0.0380089	0.0191872	-0.15003	0.105002	-0.113437	-0.0138183	0.0358333	-0.0621692	0.0304743	-0.0465548	0.0719469	-0.0260284	0.0445271	-0.0867767	0.0525286	-0.0599044	-0.0582399	-0.0502469	0.0479227	-0.0933752	-0.0300618	0.0168698	0.0652921	0.0373812	-0.0252634	0.0624036	-0.0141559	0.157001	-0.00157015
TaxonAdjustedID.MGS.down.10000000.v6.3151	CAG03098	MGS	NA	-0.0156219	-0.0649828	-0.115132	0.0853459	0.0264472	0.0371756	0.0876512	0.0478875	0.0388831	-0.0332044	-0.0196177	-0.00994876	0.0292538	-0.158891	0.0125908	0.000476739	-0.0639923	0.0372584	0.132351	-0.00902439	0.0277627	0.0553979	-0.0121659	0.112174	-0.0747664	0.0656506	-0.0798359	-0.000529331	-0.139098	-0.00391701	0.00643487	0.0194311	0.0553698	-0.0262886	0.00296504	-0.00598476	0.0109827	-0.00906884	0.0434571	-0.0337276	0.0111823	-0.115086	0.130789	-0.079048	-0.0126793	-0.0688793
TaxonAdjustedID.MGS.down.10000000.v6.3153	CAG03100	MGS	NA	-0.100213	0.011244	0.0672073	-0.158365	0.0956012	-0.0743405	-0.0767295	0.0205191	-0.0150308	-0.0793651	-0.0235836	-0.0159479	-0.105439	0.0104868	-0.0234173	-0.207578	-0.0385974	0.0080544	-0.084479	0.0959476	0.0488918	0.0927006	0.0170865	-0.0907017	-0.0697168	0.0302464	0.0266621	-0.0635789	-0.00917582	-0.098317	0.0211166	-0.0280874	0.0268067	0.0571368	0.000727757	0.00749749	0.005407	0.0971392	-0.0600383	-0.14864	-0.0190354	0.0265859	-0.0212322	0.0549512	-0.137857	-0.0999459
TaxonAdjustedID.MGS.down.10000000.v6.3159	CAG03106	MGS	NA	0.0439963	-0.0312632	0.0143438	0.0790752	-0.0950645	0.046556	0.0692403	-0.014646	0.0528674	0.0127202	0.0594367	0.0261429	0.0926234	-0.0957058	0.0510222	0.0639986	-0.0328668	0.0966116	0.0396956	-0.0681514	0.0297585	0.0519814	0.129449	0.0486099	-0.0472601	0.110386	-0.0204972	-0.0404773	-0.0463835	-0.114295	-0.00111965	0.0366488	0.0169108	0.00249712	-0.0153042	0.0685324	-0.0491334	-0.0176432	-0.0116966	0.0219625	-0.0471849	-0.217448	0.0836209	0.0814625	0.0400769	0.0132932
TaxonAdjustedID.MGS.down.10000000.v6.316	CAG00523	MGS	Bacteria;Firmicutes;Clostridia;Clostridiales;Eubacteriaceae;Eubacterium;Eubacterium sp. CAG:180	0.000695598	-0.0529018	0.0302877	0.016046	-0.04634	0.0887278	0.069475	0.0655627	0.000338632	-0.0616981	-0.035847	0.014943	0.0945388	-0.0146085	0.0237576	-0.0432088	-0.0900807	0.0596797	-0.0981086	-0.0545791	0.0556914	0.00822576	0.114706	0.0586074	-0.0625026	0.0327046	0.0154523	0.0883753	0.055529	-0.084455	0.0362299	0.0265236	-0.0861611	0.0042635	-0.0376631	0.102528	0.149449	-0.0508753	0.00726213	0.0312209	-0.028656	0.00531831	0.0608835	0.0781153	0.035304	-0.048489
TaxonAdjustedID.MGS.down.10000000.v6.3165	CAG03112	MGS	NA	0.083345	-0.0295152	0.138799	-0.163473	0.0300909	-0.08081	-0.0692799	-0.0143383	-0.00131344	-0.0452927	-0.114869	-0.05393	-0.134548	-0.00317086	-0.0123161	-0.150861	-0.0493819	-0.0419967	-0.0319219	0.0347377	6.15e-05	0.134495	0.00490018	-0.0483372	0.0805876	0.0458916	0.0100602	0.0187812	0.0356214	-0.172963	0.0425154	-0.0231016	0.0237082	0.048885	0.00991067	0.0100409	-0.0609572	-0.0407158	-0.0280415	-0.142416	-0.104539	-0.0366386	-0.055591	0.0895892	-0.0766636	-4.22e-05
TaxonAdjustedID.MGS.down.10000000.v6.3166	CAG03113	MGS	NA	0.120679	0.0599968	0.0378205	-0.0113734	-0.0257333	0.075164	0.0331121	0.0245152	0.0344509	0.102953	0.0569403	0.0731978	0.0246897	0.047158	-0.00515365	0.00879971	0.0686896	-0.0691993	0.129549	0.100363	0.116471	-0.0761128	-0.0030312	-0.0527749	0.170382	0.115992	-0.0193012	0.0112112	-0.00534557	-0.0340604	-0.0553949	-0.0271472	-0.0896616	-0.0476261	0.0407788	0.0198666	0.00106215	0.0321742	-0.0128572	-0.108323	0.0700795	0.0988362	-0.00761221	-0.0834034	0.0746538	0.041351
TaxonAdjustedID.MGS.down.10000000.v6.3168	CAG03115	MGS	NA	-0.0982828	0.0427471	-0.111853	0.0361868	0.0734962	0.106166	-0.011229	-0.0486704	-0.0174732	0.010081	0.0471817	0.102428	0.0883265	-0.0359034	0.157242	0.0246698	0.0656275	0.0284864	0.011229	0.02538	-0.0632217	0.0207483	-0.0182579	-0.00820678	0.0248544	0.0193845	0.00973368	0.0492551	-0.0567374	0.0910187	-0.0222404	0.0205502	0.0145871	0.0624734	-0.147475	-0.0459491	-0.0628859	-0.0384175	-0.0957189	0.158447	0.124211	-0.0796891	0.0177115	-0.0612183	-0.00764073	-0.0282067
TaxonAdjustedID.MGS.down.10000000.v6.317	CAG00302	MGS	Bacteria;Proteobacteria;Alphaproteobacteria;Rhodospirillales;Rhodospirillaceae;Azospirillum;Azospirillum sp. 51_20	-0.0273457	-0.0515191	-0.0346801	-0.011554	0.0460848	0.0456947	0.113524	0.102125	0.104715	0.0781696	-0.0427773	-0.00055194	-0.0048589	0.0441657	0.0190199	-0.0380927	0.0261592	0.101801	0.0304019	-0.0286946	0.0923085	0.00743188	0.0374343	0.0286809	-0.0114889	0.0696976	0.048411	-0.00822661	-0.0215473	0.0396597	0.0919353	-0.0717069	0.1438	-0.0116501	-0.0180851	-0.0455346	-0.0167545	0.0160094	0.0314019	0.0237343	-0.0837581	-0.024776	0.0893489	0.0337089	0.0108019	0.124852
TaxonAdjustedID.MGS.down.10000000.v6.3173	CAG03387	MGS	NA	0.168883	-0.076412	-0.0982081	0.11367	-0.0192484	0.0898456	0.0277784	-0.0465302	0.0859922	0.141129	-0.0510411	0.0963849	0.0793514	-0.0990111	-0.0312128	0.0756845	-0.000727966	0.137382	0.133113	-0.0242484	0.0321342	-0.027516	-0.0796762	-0.00751163	0.0137015	0.115603	-0.0137412	0.0828249	-0.00487192	0.00734303	-0.0519816	0.128721	0.0776486	-0.0179337	-0.001565	0.124388	-0.0112737	-0.0410691	0.0619062	0.0472771	-0.0330718	-0.000556817	0.0492208	0.0463501	0.12086	0.0889443
TaxonAdjustedID.MGS.down.10000000.v6.318	CAG00303	MGS	Bacteria;Firmicutes;Clostridia;Clostridiales;Clostridiaceae;Clostridium;unclassified Clostridium	0.04887	0.0584052	0.133373	-0.0718978	-0.0582271	-0.0127551	0.0752237	0.0896831	0.02561	-0.0222086	0.111482	0.0537837	0.091399	0.0497057	0.010365	0.0549939	-0.025648	-0.0787513	-0.0193526	-0.0187577	0.0507494	0.0269376	-0.00378957	0.0475492	0.0165514	0.0173895	-0.0415261	-0.0588898	0.00698782	0.0150937	0.0453983	-0.067361	-0.0190544	0.0803703	0.0158865	0.00337888	-0.112902	-0.080566	-0.0458007	-0.0427078	-0.0695325	-0.00938542	0.0272848	0.0219299	-0.0198108	-0.00867232
TaxonAdjustedID.MGS.down.10000000.v6.3184	CAG03130	MGS	NA	-0.129667	-0.0411429	0.15905	-0.181152	0.0281683	0.028159	-0.150028	0.00151592	-0.0987943	0.186932	-0.115463	0.0129625	-0.0876319	0.0173417	0.0881189	-0.0313785	0.0299729	-0.134126	0.126839	0.0746546	0.0356276	0.00718291	-0.0254898	-0.181367	-0.0591898	-0.0384678	-0.0963222	0.0274031	0.10327	-0.0241124	0.104337	-0.096348	0.00779333	0.124198	0.0110374	-0.106011	-0.021069	-0.0168102	-0.0775507	-0.153812	0.0260323	0.0434734	-0.024418	0.0319684	-0.0726699	0.0171297
TaxonAdjustedID.MGS.down.10000000.v6.3187	CAG03133	MGS	NA	0.123897	0.0604934	-0.0897272	-0.00660704	0.0954126	0.171435	0.0904561	0.143963	-0.00394135	0.032993	0.00919918	0.172258	0.107524	-0.087734	0.0521553	0.00928651	0.0713692	-0.0643818	-0.0458615	-0.0459164	0.0908788	-0.00625807	0.0610726	0.0355698	0.0545251	0.0981857	0.0692484	-0.0637019	-0.0617554	-0.0119079	-0.07181	0.10058	-0.0769771	0.0962857	0.00805632	0.0205704	0.0154513	0.0283678	-0.00017343	-0.050874	-0.0236484	-0.0306361	0.0621637	-0.0645841	0.0190406	0.0158956
TaxonAdjustedID.MGS.down.10000000.v6.319	CAG00306	MGS	Bacteria;Firmicutes;Clostridia;Clostridiales;unclassified Clostridiales;unclassified Clostridiales;Clostridium sp. CAG:221	0.13047	0.0790102	0.00945289	0.0322159	-0.042296	0.127334	0.0949887	0.13044	0.0309564	0.0443616	-0.00388656	0.139084	0.0858446	0.0619549	0.0663157	0.00234246	0.0331109	-0.0281288	0.0475918	-0.0897452	0.0994289	-0.0539917	0.070517	0.0173683	0.146938	-0.0107582	0.00446958	-0.0974051	0.0376775	0.0431844	-0.0505978	0.0679863	-0.0243324	0.125229	0.0623424	0.0611582	0.0416859	0.0770371	0.0520013	0.0507057	-0.0493806	0.0464645	0.0802415	0.0136102	0.0451707	0.00980702
TaxonAdjustedID.MGS.down.10000000.v6.3197	CAG03143	MGS	NA	0.0454756	-0.015869	0.158065	0.0972772	-0.255687	0.0938661	0.138828	0.100192	0.10064	-0.0532249	-0.0776927	0.0521911	0.0888514	0.139622	0.047061	0.0772359	-0.0108829	0.113274	0.06413	-0.0169599	0.0478401	0.180268	0.0334905	0.0548413	-0.0682427	0.0726195	-0.0427855	0.00614662	0.049851	-0.0977882	0.0228465	0.00897587	0.0292361	-0.108564	0.127998	0.055818	0.151754	-0.0313173	0.0203853	0.123869	-0.0874098	0.0380682	0.194418	0.0815965	0.00777547	0.0802639
TaxonAdjustedID.MGS.down.10000000.v6.32	CAG00039	MGS	Bacteria;Firmicutes;Clostridia;Clostridiales;unclassified Clostridiales;unclassified Clostridiales;unclassified Clostridiales	0.194161	0.129511	0.110264	0.134382	-0.246414	0.0748843	0.0153374	0.0347935	-0.0576619	-0.0803813	0.00467117	0.117142	0.126324	0.0941018	0.04675	-0.0100201	-0.149422	0.0495095	0.00923086	-0.0521372	0.0477106	0.00130397	0.0342029	-0.136501	0.0276281	0.18726	0.0117939	-0.0575094	0.11175	-0.115201	-0.0460284	0.0090299	-0.0243515	-0.027628	0.00355072	0.0979471	0.00657258	-0.0857358	-0.0519177	0.00112438	-0.0533591	0.0203388	0.0460703	0.0412537	0.188576	0.0206611
TaxonAdjustedID.MGS.down.10000000.v6.3203	CAG03149	MGS	NA	0.131323	-0.037272	0.10456	0.00220373	-0.105563	0.0743982	-0.0289673	-0.0322947	0.0672967	-0.00886759	0.0529135	0.0288433	-0.0432364	0.0326488	0.0670027	-0.0992313	-0.0201129	0.0200278	0.112126	-0.0246493	-0.00842	0.0809714	-0.0289827	-0.0251192	0.00841873	0.133586	0.0261208	0.0270684	0.127372	-0.0114134	0.0172221	0.0311798	0.0912204	0.0559632	0.0103695	0.0565091	0.087215	0.10148	0.0370978	-0.0246077	0.00762901	0.0357208	0.0457881	0.0360963	-0.0190898	0.0112204
TaxonAdjustedID.MGS.down.10000000.v6.3210	CAG03156	MGS	NA	-0.0166976	-0.0339719	0.124313	-0.0721768	-0.0489903	-0.000561485	0.0631478	0.100184	0.0971484	0.0206937	0.0904674	-0.0773683	-0.141243	-0.00141367	0.0458103	-0.0750942	0.0465843	0.0319473	0.0193042	0.0288363	0.0641768	0.0355757	0.0454182	0.0809439	-0.106594	-0.0172658	0.172488	0.0771933	-0.00396761	0.00236668	-0.0751517	-0.056848	-0.0545548	-0.0495576	0.0272293	-0.026959	0.0304333	0.0681692	0.0170545	-0.0463312	-0.071534	-0.00577408	0.0235909	-0.057578	0.0155572	0.0450358
TaxonAdjustedID.MGS.down.10000000.v6.3214	CAG03160	MGS	NA	-0.0184457	-0.0408119	0.0223832	-0.0778939	0.0575684	0.00315781	-0.0172124	0.0675888	0.105973	-0.0375204	0.0138858	-0.0879712	-0.0548026	0.0894153	-0.00466861	-0.000820731	0.00484285	-0.0294208	0.0411529	0.0566495	0.0473738	0.0307416	0.0645352	0.0108835	0.0665725	-0.0354456	0.0360594	0.0542256	0.0190022	-0.00337494	-0.0245668	-0.0108189	-0.0248594	0.00147634	0.066719	-0.0105628	0.0566106	0.00139413	-0.0557609	-0.104648	0.0403732	0.0161109	0.075756	-0.0251654	-0.0270475	-0.079732
TaxonAdjustedID.MGS.down.10000000.v6.3218	CAG03164	MGS	NA	0.129448	-0.00236829	0.132602	0.0288445	-0.160523	-0.147961	-0.0822274	-0.0950331	-0.0499722	-0.0570819	-0.0269003	-0.118764	-0.00250028	-0.105768	0.0226636	-0.016533	-0.125205	0.0753316	0.0929421	0.0277903	-0.0894116	-0.0363229	-0.0380432	-0.060225	0.099362	0.0467762	-0.0101424	-0.0611522	-0.0316839	-0.0766928	-0.0358151	-0.119589	-0.0291878	-0.106674	-0.00833663	0.0798966	-0.0939971	-0.0478179	-0.00929085	0.0636022	-0.137186	0.0114734	-0.0841567	-0.00155881	0.0414005	-0.0604152
TaxonAdjustedID.MGS.down.10000000.v6.322	CAG00309	MGS	Bacteria;Bacteroidetes;Bacteroidia;Bacteroidales;Rikenellaceae;Alistipes;Alistipes onderdonkii	-0.115145	-0.115135	-0.0470049	-0.0129508	0.0596909	-0.0410112	-0.0601571	-0.077344	-0.039249	0.0616674	0.00114546	-0.0504464	0.0400153	-0.0379721	-0.00635733	-0.0982623	-0.0204801	0.0345399	-0.0225803	-0.00174595	-0.0960099	0.0354307	-0.0381327	0.0293224	-0.0681068	-0.0226947	-0.183809	0.10761	0.10408	0.0546859	-0.0408179	-0.0888945	0.143541	-0.0119952	0.0241368	-0.0695788	-0.0309987	-0.00665695	0.0901084	-0.0540326	0.0116853	0.148855	-0.0362131	0.0317318	-0.126861	-0.0242535
TaxonAdjustedID.MGS.down.10000000.v6.3227	CAG03174	MGS	NA	0.12916	-0.117654	-0.093053	0.186777	-0.0991288	0.135536	0.0696868	-0.0589146	-0.0484456	0.0200973	-0.0123731	0.054932	0.0951525	-0.099346	0.0345322	-0.00943084	-0.0384253	0.205142	0.0883028	-0.030249	0.000152179	0.0241663	0.038624	0.00154151	-0.178197	0.0696414	-0.0394372	0.0184735	0.00448244	-0.00327192	-0.0907458	0.0852172	0.0813446	-0.0607759	-0.0848011	0.0602587	-0.080639	0.0645207	0.000453687	0.129876	-0.0625081	-0.0431148	-0.00721895	-0.00595116	0.202236	-0.00425035
TaxonAdjustedID.MGS.down.10000000.v6.3231	CAG03178	MGS	NA	0.113438	0.10169	-0.103704	-0.00494119	0.107518	0.181764	0.105217	0.143632	0.0196854	0.0388233	0.0497839	0.186964	0.137715	-0.0868912	0.0425203	0.0146942	0.100673	-0.0602835	0.0161844	-0.0512824	0.0702756	0.0219584	0.0766437	0.0646776	0.0793892	0.117866	0.0728729	-0.0821007	-0.0731223	-0.00189459	-0.0863152	0.10106	0.00101659	0.0884919	0.00404394	0.0146094	-0.0368886	0.0364383	0.0176423	-0.075887	-0.0228264	-0.055273	0.0253064	-0.00103256	0.0491901	0.0311709
TaxonAdjustedID.MGS.down.10000000.v6.3236	CAG03183	MGS	NA	-0.114887	-0.0328124	-0.0347621	-0.10508	0.141841	-0.0159657	-0.0548593	-0.0945028	0.0280025	0.0361318	-0.0988767	0.0094264	-0.0871275	-0.0315708	0.0181449	-0.0194937	0.0184603	-0.010597	0.0701546	0.0882422	0.000891162	0.0285653	-0.0179132	-0.0169068	0.0588528	-0.0479261	0.0829957	-0.0343072	-0.148582	0.0799382	0.0321589	-0.0514115	0.0139513	0.172322	0.0232855	0.00705501	0.0101142	-0.0163286	-0.0934677	-0.0323787	0.107376	0.00674923	0.00105942	-0.0320987	0.0243817	-0.0220216
TaxonAdjustedID.MGS.down.10000000.v6.3238	CAG03185	MGS	NA	-0.0085376	0.0110098	0.0202237	0.00922387	-0.0294176	-0.0224405	0.0467798	-0.0336301	0.00135017	-0.00399754	-0.0209404	-0.00419042	0.0399208	0.0635565	0.0869667	0.0607119	-0.0924555	0.000452673	0.0109442	-0.135321	-0.000520751	0.0945536	-0.00125884	0.0384192	-0.0144648	0.0476137	-0.0524602	-0.0186686	0.0461118	-0.0544224	-0.00437427	-0.113181	-0.0232276	-0.0105111	0.0246543	-0.0487306	-0.0550861	-0.0365737	0.0125066	-0.0420939	-0.0611956	-0.0936857	-0.0506981	-0.024235	0.0156587	0.0487263
TaxonAdjustedID.MGS.down.10000000.v6.3241	CAG03188	MGS	NA	0.0188053	0.103874	-0.11652	0.0258776	0.0886538	0.126873	0.0994785	0.105203	0.0399955	-0.0269569	0.120499	0.0832906	0.164906	-0.0937742	0.0270902	0.0942763	0.04176	-0.0437539	-0.0116964	-0.051218	0.0630837	-0.00433859	0.12469	0.12391	0.0613331	0.032195	0.0507205	-0.0553734	0.0230594	0.00139336	-0.104555	0.0930584	0.0547659	0.0450001	-0.0103411	0.00646936	-0.0383045	0.0652781	-0.0144507	-0.0623119	-0.0434343	-0.0546657	-0.034128	0.075432	0.0589866	0.0744872
TaxonAdjustedID.MGS.down.10000000.v6.3245	CAG03192	MGS	NA	-0.0174286	-0.00290719	0.108767	-0.0172809	-0.0897874	-0.0589262	-0.0023989	0.0451011	0.0531499	0.0330753	0.0377083	-0.0350936	0.0925156	0.075925	-0.0870764	-0.0681421	-0.0483125	0.0771177	0.056966	-0.0663145	-0.0120786	0.0325492	0.0312724	-0.032184	-0.00805924	-0.00222407	0.14984	0.0922975	0.124444	-0.0476193	-0.0523614	-0.0699866	-0.0927713	-0.0258735	0.125298	-0.0447145	0.0339881	0.0434707	-0.042607	0.0855887	-0.0490417	0.191402	0.0223672	-0.0173558	0.02445	-0.051317
TaxonAdjustedID.MGS.down.10000000.v6.3247	CAG03194	MGS	NA	-0.0302075	-0.0505805	0.186071	-0.153301	-0.0270212	-0.062794	0.0241985	0.133749	0.0287988	-0.099401	-0.0987168	-0.0838122	0.0340221	0.118665	0.00738169	-0.158138	-0.0331079	-0.111508	-0.0375639	0.181444	0.0975361	0.0194701	-0.0764872	-0.010904	-0.0308749	0.00269374	-0.0252534	-0.0280898	-0.000408327	-0.0414748	0.0392954	-0.174248	0.00459848	-0.0834897	0.15665	-0.122816	0.026346	-0.106725	-0.0154629	-0.117095	-0.0333719	0.0560854	0.0949978	-0.0565722	-0.108743	0.128837
TaxonAdjustedID.MGS.down.10000000.v6.3250	CAG03197	MGS	NA	-0.121439	-0.145172	-0.0282524	-0.139448	0.170566	-0.139041	-0.143801	-0.136544	-0.10437	0.013112	-0.102493	-0.0761922	-0.0983272	-0.0841309	-0.0910158	-0.0631232	-0.0166346	-0.027486	0.0112925	0.143646	-0.129552	0.143776	-0.0245356	-0.12866	-0.0331444	-0.0540414	-0.0337971	-0.00827358	-0.0224123	-0.0598739	0.0574074	-0.0145523	-0.00570683	0.021859	-0.0810309	-0.0601234	-0.0611633	0.0366846	-0.0765267	-0.0834381	-0.0162664	-0.0717175	-0.109818	0.0283567	-0.115216	-0.0442603
TaxonAdjustedID.MGS.down.10000000.v6.3252	CAG03199	MGS	NA	0.0970763	-0.152033	-0.0839579	0.0661663	0.0152667	-0.0199409	0.0683058	0.116498	0.0299647	0.0170161	0.0154823	-0.0315503	0.0280102	-0.254135	-0.0216826	0.0652326	-0.146748	0.057926	-0.0251827	0.0801955	0.0158462	-0.157678	0.0529616	0.09266	0.0106312	0.0507532	0.0226016	0.104176	0.0402009	-0.0238204	0.0216207	0.118629	-0.0336479	-0.0903151	0.0161299	0.0241967	-0.103498	-0.0333833	0.0614981	-0.102012	-0.170584	0.0403414	0.0403773	-0.0251559	0.122207	-0.00468661
TaxonAdjustedID.MGS.down.10000000.v6.3258	CAG03205	MGS	NA	-0.0115811	-0.0531187	-0.0663561	-0.102887	0.170813	0.077194	-0.00740028	-0.0668135	-0.0118281	0.151577	0.0523603	0.0527613	0.128373	0.0430608	0.11541	0.00285963	0.113006	0.0139105	-0.021255	0.0684036	0.0150056	0.0821759	0.0799088	-0.032709	0.137275	0.0730073	-0.0532748	0.105017	0.0226588	0.0833109	-0.0516246	0.012964	0.0109982	0.0930103	-0.108923	-0.0297922	-0.0310481	0.0472739	0.0294285	0.0269124	0.0261934	0.0590071	-0.101261	0.0450257	-0.0243168	0.0555693
TaxonAdjustedID.MGS.down.10000000.v6.3263	CAG03211	MGS	NA	-0.0956873	0.0992015	-0.0404595	0.05152	-0.0127285	0.0371858	-0.0321006	0.0631606	-0.0175881	0.0438656	0.11639	0.0503734	0.0615164	0.0352523	-0.0461858	0.0921957	0.0453585	-0.047383	0.00673161	-0.0706877	-0.0252826	0.102645	-0.0104497	-0.126917	-0.00515993	-0.0322554	0.054349	0.0155989	-0.0134578	0.0940641	-0.0523316	0.097927	0.0671198	-0.0457489	0.0317544	0.0113432	0.0561567	0.0236965	0.00797646	0.0628878	0.0668361	-0.086317	-0.0140259	0.0221219	-0.0392237	-0.0703722
TaxonAdjustedID.MGS.down.10000000.v6.3265	CAG03213	MGS	NA	-0.0669525	0.064985	0.0298776	-0.103457	0.0763141	-0.0376327	-0.0782452	-0.0588993	-0.047198	0.0890976	0.0932839	0.0536278	-0.0444588	0.07581	0.13103	0.00391443	0.0428149	-0.0558421	0.0814931	-0.013428	0.000872336	0.0238502	-0.0958545	-0.116544	-0.00135661	-0.00576987	-0.0723217	-0.0146377	-0.00937433	0.0416044	-0.034501	0.0216536	0.0362316	0.0507191	-0.0466085	-0.0463982	0.00144033	0.0197783	0.0744212	-0.0798404	0.0388483	-0.00994048	-0.0974582	0.0817861	-0.0357891	-0.0933426
TaxonAdjustedID.MGS.down.10000000.v6.3267	CAG03215	MGS	NA	0.00705911	0.087795	-0.0304401	0.0221433	0.00742382	0.0163077	0.02237	0.0575523	0.0530249	-0.0256163	0.0856102	0.00615621	0.0728879	0.00805892	0.0227926	0.144572	0.00977315	-0.0466088	-0.037494	0.0613398	0.0364367	0.0379216	0.0875867	-0.0709432	-0.0245536	0.030393	0.0834011	-0.0405949	-0.0352874	-0.00312117	-0.0868606	-0.049854	-0.0794051	0.017937	0.0640179	-0.0247375	0.107695	0.0465667	-0.0845142	0.0662681	-0.0953786	-0.0980316	0.067345	-0.0312022	0.0744725	0.0136024
TaxonAdjustedID.MGS.down.10000000.v6.3268	CAG03216	MGS	NA	0.0400206	-0.00151351	0.0427449	-0.0384178	-0.00293288	-0.00119909	0.0976696	0.142835	0.00454975	-0.08184	-0.0361832	-0.0442577	0.0442079	0.0988544	0.0638546	-0.118234	-0.0647326	-0.00265351	-0.0268852	0.0924706	0.140509	0.142524	0.0549542	-0.0148896	-0.0575947	0.0610951	-0.0128258	-0.0318831	-0.0192676	-0.112379	-0.0429542	-0.158969	-0.083212	-0.072783	0.0252145	-0.0441108	0.00745679	-0.0967982	-0.0839993	-0.106328	-0.125168	-0.0831035	0.0992644	0.145365	0.0749279	-0.0301469
TaxonAdjustedID.MGS.down.10000000.v6.3271	CAG03219	MGS	NA	-0.0543836	-0.0697115	0.039046	-0.0613866	0.0242183	-0.0689424	-0.0437044	-0.0195078	-0.0379966	-0.0479867	-0.119026	-0.0737504	-0.0971737	-0.00642872	0.000375941	-0.105532	-0.0389478	-0.0038361	0.0984098	0.0155088	-0.0593118	0.176903	0.0341904	-0.0707485	0.0388012	-0.00724891	-0.042954	0.0546591	0.02361	-0.0330492	0.0561461	-0.127872	0.0227712	0.0602479	0.0343643	-0.103629	0.0139411	0.0613763	-0.0204659	0.0132313	-0.044862	-0.00988475	0.0211615	0.0559937	-0.0468904	0.0432926
TaxonAdjustedID.MGS.down.10000000.v6.3272	CAG03220	MGS	NA	-0.102979	-0.103406	0.0355857	-0.10708	0.074381	-0.0445636	0.0331459	0.0757412	0.0481098	0.00879539	0.0099887	-0.046447	0.0438682	-0.0412269	-0.0955012	-0.0103381	-0.0707035	-0.0226691	-0.0534114	0.102319	0.11208	-0.0380706	-0.0104041	0.0202173	0.033158	-0.0981666	-0.0714399	0.0619826	-0.0272305	0.0480604	-0.0197468	-0.0183044	0.0314097	-0.000233526	0.0918551	-0.0869967	-0.0504534	0.00843977	-0.0206981	-0.0391302	0.0950144	0.0787078	0.0324248	0.0625898	-0.0708939	0.0466947
TaxonAdjustedID.MGS.down.10000000.v6.3273	CAG03221	MGS	NA	0.0833197	0.222044	0.019355	0.207754	-0.231652	0.0274847	-0.0607342	-0.0368347	0.0107096	-0.0875847	0.037747	-0.0120465	0.147031	0.0798775	-0.00616229	0.127849	0.045194	0.0673927	0.0488525	-0.145782	-0.0437065	0.00942652	-0.00678454	-0.0772479	-0.0102959	-0.0989605	0.0239622	-0.0381938	0.00706417	0.101753	-0.13199	0.1013	-0.0437816	-0.0377258	0.0278998	0.0902423	0.0850643	0.0668126	0.0869891	0.0947343	0.0201895	-0.00906637	0.0209559	-0.0572178	0.051305	-0.101729
TaxonAdjustedID.MGS.down.10000000.v6.3275	CAG03223	MGS	NA	0.0445982	0.00235305	0.0929827	-0.0050186	-0.0867364	0.022482	-0.0329766	-0.00419503	-0.00873616	-0.0386676	-0.0331594	-0.0290186	-0.0705122	-0.0684242	0.0230273	-0.041126	0.0519966	0.0793556	-0.0482565	-0.104731	-0.00789571	0.0531334	-0.0849593	-0.0132139	-0.0281541	0.120874	0.000682027	0.0199736	-0.0753517	-0.0193425	0.0567028	0.038834	0.138501	0.0816467	-0.0467859	0.0825388	0.0176333	-0.0242431	-0.122213	-0.0595866	-0.0398355	-0.038575	0.0781233	0.0740618	-0.0597073	0.010959
TaxonAdjustedID.MGS.down.10000000.v6.3278	CAG03226	MGS	NA	0.144751	0.0645182	0.0212746	0.0160894	-0.0374791	0.0192363	0.0677318	0.081308	0.127664	0.0280562	0.00585467	0.0500091	-0.00792748	-0.00287914	-0.000424537	0.0339661	-0.00246552	0.131027	-0.011254	-0.0637644	0.139963	0.0358561	-0.00277204	0.0179834	0.00249447	0.169551	0.0387636	0.01393	0.0800987	-0.125686	-0.0984303	-0.0216544	0.054314	0.0930249	0.0881898	0.0887672	-0.0167376	-0.0725452	0.0950141	-0.0593342	-0.0826885	0.118735	0.0260636	0.0416721	0.115389	-0.0885738
TaxonAdjustedID.MGS.down.10000000.v6.3283	CAG03231	MGS	NA	0.0216986	-0.0976182	-0.0701921	0.0371536	0.031345	0.0119835	-0.0292862	-0.0879958	0.00060437	-0.0213481	0.037919	0.012944	-0.0363886	-0.185933	-0.0500548	0.038638	0.00920196	0.115014	0.108179	0.0773449	-0.0642175	0.0330391	0.0701859	0.0569366	-0.035169	0.0838101	0.0246998	-0.00341669	0.0462322	0.0176061	-0.110202	-0.00269155	0.123585	-0.0273194	-0.0881305	0.0341152	-0.00460389	0.0489392	-0.0817686	0.0754156	-0.0161357	0.0285386	-0.0479599	0.0658957	0.0363912	-0.0215085
TaxonAdjustedID.MGS.down.10000000.v6.3284	CAG03232	MGS	NA	0.152594	-0.00414484	-0.105699	0.121224	-0.0195747	-0.0482481	-0.159852	-0.130726	-0.0424696	-0.0133923	0.117166	0.000586931	-0.0494244	-0.122611	-0.0884798	0.104938	-0.054769	0.100641	0.0402634	-0.0358149	-0.168285	0.00364392	0.00841583	-0.131173	-0.0395415	-0.0448701	0.00602387	-0.0984178	-0.0375226	0.0814259	-0.0431689	0.125505	0.0269696	0.0449352	-0.12181	0.127348	-0.108016	-0.00380893	0.0738433	-0.0427151	-0.0522757	-0.134728	-0.111648	-0.0669038	0.110485	-0.13192
TaxonAdjustedID.MGS.down.10000000.v6.3289	CAG03237	MGS	NA	-0.123884	0.0019425	-0.025737	-0.104463	0.132293	-0.0916907	-0.176507	-0.14043	-0.122039	0.0770375	0.0174424	-0.099054	-0.110345	-0.040186	0.0100775	-0.0490999	-0.0223104	-0.0317266	0.048678	0.0916306	-0.161974	0.029038	0.0369329	-0.174945	-0.00412654	-0.0395269	-0.0570997	-0.0717268	-0.0119217	-0.0401475	0.0237073	-0.0246949	0.0491415	0.0300779	-0.0647772	-0.0453228	-0.0203772	0.0554247	0.0312655	0.015845	-0.0699484	-0.0349682	-0.117256	0.0796912	-0.106608	-0.125914
TaxonAdjustedID.MGS.down.10000000.v6.3291	CAG03239	MGS	NA	-0.0397389	-0.0290906	0.211828	-0.16872	-0.0366969	0.00565648	0.065298	0.0616217	0.0677394	0.0642506	-0.0888622	-0.0298911	0.0307522	0.0840384	-0.0275813	-0.106073	0.0747833	-0.0673705	-0.0507576	0.0871637	0.0613348	0.0619302	0.0109115	-0.00344256	-0.0409659	0.0565004	0.069774	-0.00791863	0.0839208	-0.124994	0.0874811	-0.158741	0.158106	0.00364017	0.203521	-0.0662819	0.0366685	-0.127652	-0.0580565	-0.0264197	0.0669972	0.016943	0.0913453	-0.0152708	-0.000262659	-0.00201433
TaxonAdjustedID.MGS.down.10000000.v6.3296	CAG03244	MGS	NA	-0.02875	0.100467	0.0654155	-0.0622248	-0.000978228	0.0479416	0.00434587	0.0541169	0.00196353	-0.00387178	-0.0268866	0.0814161	0.0406651	0.0449462	0.0500383	-0.0497218	0.0740654	-0.0258776	-0.0503084	0.0611384	-0.0562475	0.0833395	0.0270906	-0.043334	0.0327339	0.0260517	-0.010482	-0.0440593	0.00986944	-0.00165815	-0.022463	-0.0549561	0.0163217	0.0209309	0.123616	-0.0467739	-0.0438839	0.0201701	0.110539	0.0212099	0.0417196	0.016991	0.0611918	-0.0507046	-5.72e-05	-0.0449662
TaxonAdjustedID.MGS.down.10000000.v6.330	CAG00317	MGS	Bacteria;Firmicutes;Clostridia;Clostridiales;unclassified Clostridiales;unclassified Clostridiales;Clostridium sp. CAG:230	-0.0248358	-0.0558312	0.190177	-0.132098	-0.0527685	-0.0764652	0.00668457	0.128595	0.00235826	-0.0741786	-0.114042	-0.073931	-0.009773	0.0980931	-0.0356673	-0.134622	-0.037833	-0.0745601	-0.0749039	0.17313	0.06036	-0.0158139	-0.0484903	0.0147014	0.0383564	0.0150946	-0.063349	-0.0147915	0.0106508	-0.00568814	0.0375039	-0.173763	-0.00654257	-0.0949681	0.156103	-0.109223	0.0353007	-0.134461	-0.013508	-0.101141	-0.0558263	0.0512242	0.063071	-0.0405157	-0.123638	0.114026
TaxonAdjustedID.MGS.down.10000000.v6.3326	CAG03274	MGS	NA	0.0225708	0.0363415	-0.103238	0.0645815	0.0359375	0.0729452	0.0641482	0.0149357	-0.0306795	-0.0683375	0.042042	0.0583382	0.0242663	-0.0371789	0.039449	0.0972354	-0.0424817	0.0477017	0.00640944	-0.0280718	-0.0091032	0.0127907	-0.123828	-0.00238644	-0.0376493	0.0626714	0.0417725	-0.0996118	-0.0766788	0.00386308	-0.0639132	0.0681805	0.0608013	0.0432451	-0.030317	0.0477467	0.024621	0.0539475	0.0965694	-0.0342443	-0.0309649	-0.0668533	0.021864	0.0199332	0.0431805	0.0986129
TaxonAdjustedID.MGS.down.10000000.v6.3329	CAG03277	MGS	NA	0.118951	0.088482	0.00901444	0.0229294	-0.0323629	0.0421405	-0.0589719	-0.0610979	-0.0014812	0.0342653	0.015543	-0.0264866	-0.00641789	0.0439388	0.0483942	0.0670803	-0.0198531	-0.00959104	0.0263472	0.0487971	0.0542563	-0.028535	0.0680468	0.0177516	0.0138549	0.0478596	0.0362164	0.0612249	0.0515418	-0.0729544	-0.0338102	-0.0566513	-0.0114558	0.0705615	-0.0256508	0.0215677	0.0497912	-0.0182479	-0.031337	-0.00325857	-7.44e-05	0.0496694	0.0314182	-0.0447964	0.0641675	0.0920923
TaxonAdjustedID.MGS.down.10000000.v6.333	CAG00320	MGS	Bacteria;Firmicutes;Negativicutes;Acidaminococcales;Acidaminococcaceae;Phascolarctobacterium;Phascolarctobacterium sp. CAG:207	-0.0714864	-0.00697148	0.0747311	-0.0775837	0.0055294	-0.0304836	-0.0724959	-0.0620794	0.0468342	0.0353703	-0.0882587	-0.0411351	0.0334048	0.0115183	-0.055985	-0.0137999	0.0601145	0.0240616	-0.0129593	0.100803	0.00265605	0.101296	-0.0817234	-0.0740214	-0.0510421	-0.0441854	0.104518	0.012357	0.0570153	0.000761697	0.066544	-0.0670753	0.065962	-0.00383722	0.0106328	0.071459	-0.0854551	-0.0350323	-0.0511904	-0.0759878	0.053895	0.0561595	-0.0323753	0.128845	0.0964474	0.0364582
TaxonAdjustedID.MGS.down.10000000.v6.3331	CAG03279	MGS	NA	-0.164066	-0.0697955	0.029264	-0.0666586	0.0392764	-0.068986	-0.0932388	-0.0603218	0.0155213	0.0724871	0.0348786	-0.019855	0.00251013	0.0791045	0.0199114	-0.135966	0.0345668	0.044459	0.0307776	0.0915931	-0.0502144	0.0150006	-0.0431405	-0.0735305	0.0692209	-0.0245248	-0.0377183	-0.0236208	0.15227	0.0139063	-0.0181817	-0.124416	0.0270633	-0.0378124	0.0824741	-0.00896811	0.0571226	-0.0595073	-0.041043	0.0672768	-0.0104758	0.0337339	-0.0491651	-0.015004	-0.00474473	-0.0306658
TaxonAdjustedID.MGS.down.10000000.v6.3333	CAG03281	MGS	NA	0.179342	0.0686636	-0.0863581	0.134492	-0.052257	0.0516977	0.0372598	-0.0623052	-0.0434481	0.0117714	0.0125906	0.0142819	0.0410579	-0.128461	0.0734933	0.0600059	-0.0780678	0.0875893	0.143689	-0.0894526	0.0503344	0.0359605	0.0914954	0.0247237	-0.0184646	0.0990579	0.068867	-0.0630176	-0.121781	-0.0760741	-0.160922	-0.0372328	-0.00305858	0.0673502	-0.0510409	0.0888248	-0.0392071	0.000637703	-0.00975756	0.0829196	-0.0314008	-0.085773	-0.0250905	0.06012	0.111299	-0.0434787
TaxonAdjustedID.MGS.down.10000000.v6.334	CAG00321	MGS	Bacteria;Firmicutes;Clostridia;Clostridiales;unclassified Clostridiales;unclassified Clostridiales;Clostridium sp. CAG:138	0.109967	-0.0785659	0.0846616	0.0393688	-0.123922	0.0686924	0.00410841	-0.0493133	0.0445265	-0.0275337	-0.0755757	0.0151965	0.0538282	0.079402	0.00548176	-0.0241859	-0.0783139	0.0805414	-0.0227932	0.00877544	0.0419462	0.00524681	0.0402339	-0.0258074	-0.030405	0.0663424	-0.0144464	0.0209768	-0.00281014	-0.100649	0.0147903	-0.0278487	0.0396144	-0.0478237	-0.0034937	0.0621006	0.068842	-0.087568	-0.0802751	0.00135677	-0.0198779	0.0566678	0.0325169	0.00176866	0.00286326	0.0480447
TaxonAdjustedID.MGS.down.10000000.v6.3358	CAG03306	MGS	NA	-0.0199206	-0.109716	0.0989925	-0.212354	0.119425	0.0572365	0.0415701	0.0739398	0.01782	0.210354	-0.0578206	-0.0575065	-0.110384	0.0367414	0.112143	-0.00618123	0.144932	-0.175949	0.0132106	0.185805	0.136039	0.0841097	0.0376223	0.00607842	-0.0600411	0.00975895	0.0355934	0.13489	0.0864902	0.047386	0.0695175	-0.0646783	0.0667	0.0455475	0.120454	-0.17166	0.0365473	0.0307693	-0.042909	-0.0943201	0.0688823	0.0372916	0.0463686	0.0330307	-0.0745986	0.104022
TaxonAdjustedID.MGS.down.10000000.v6.3363	CAG03311	MGS	NA	0.0598028	0.0597304	0.155056	-0.0928289	-0.0582389	-0.0691219	0.0268232	-0.0232728	0.0496162	-0.0305214	-0.0588299	-0.111094	0.00164346	0.117429	-0.0332713	-0.143362	0.0182496	-0.0584114	0.0440657	0.0765701	0.0641216	0.126183	-0.0535654	0.0149824	0.10816	0.134688	0.0229045	-0.0424454	0.121729	-0.142686	-0.0617889	-0.10738	-0.0477849	-0.0807752	0.164171	-0.0904729	-0.0338711	-0.0448969	-0.0912648	-0.0314194	-0.0176664	0.113905	0.0428186	-0.0570836	0.0113961	-0.0246161
TaxonAdjustedID.MGS.down.10000000.v6.3366	CAG03314	MGS	NA	0.0276962	0.141941	0.041215	0.0105748	-0.0515397	0.0272171	0.00877004	-0.0213427	0.0260199	-0.0386792	0.0474858	0.0405013	0.05238	0.0200667	-0.0168354	-0.00783888	0.000342144	0.0328504	-0.0781599	0.0110617	0.0323582	-0.00542673	-0.0274789	-0.00240777	0.084177	0.10173	-0.000651479	-0.0269293	-0.0549834	0.00947468	0.0163472	0.0826019	-0.0669076	-0.0313344	0.0292075	0.0460972	0.0575402	0.0892173	0.0519808	-0.0200902	0.0273989	-0.0784629	0.022539	0.00974845	-0.0490003	-0.104853
TaxonAdjustedID.MGS.down.10000000.v6.337	CAG00324	MGS	Bacteria;Firmicutes;unclassified Firmicutes;unclassified Firmicutes;unclassified Firmicutes;unclassified Firmicutes;Firmicutes bacterium CAG:94	0.128668	0.0152161	-0.166636	0.243571	-0.084526	0.112469	-0.126706	-0.196089	-0.00839918	0.161319	0.123527	0.0713914	0.0318077	-0.101949	-0.0307093	0.296171	-0.0113119	0.16638	0.121364	-0.0872778	-0.211234	-0.020988	0.115874	-0.135981	-0.0905126	0.0150871	-0.0305739	-0.106082	-0.0418175	0.144637	-0.0296416	0.188139	0.0724391	0.129196	-0.144263	0.193366	-0.0303946	0.106225	0.0809749	0.134766	-0.0411708	-0.0964103	-0.0465358	-0.0546097	0.145481	0.000781133
TaxonAdjustedID.MGS.down.10000000.v6.3372	CAG03320	MGS	NA	0.00224672	-0.028272	0.128881	-0.0639764	-0.0618928	-0.0449755	-0.0696524	-0.0408789	-0.0580331	0.0184878	-0.11085	0.0298717	-0.0689008	0.0294299	0.0244031	-0.00486237	-0.0530109	-0.0390937	-0.00322731	0.0408999	-0.125829	0.0256184	-0.0495232	-0.151828	-0.0562755	0.0745958	-0.0659419	-0.0695698	0.0916946	-0.00978282	0.0170011	-0.061066	0.132555	-0.0698796	0.107582	-0.0261156	0.0523097	-0.0649687	0.0180096	-0.162818	-0.0290329	0.0625406	-0.00498274	0.0624998	-0.00431036	0.00191679
TaxonAdjustedID.MGS.down.10000000.v6.3373	CAG03321	MGS	NA	0.0764213	-0.0744228	0.00658406	0.0567337	-0.0645426	0.112218	0.17016	0.108643	0.126481	0.0781809	-0.00575577	-0.00204316	0.173061	0.00315845	0.0030806	0.00851598	-0.00858267	0.0271666	0.0367843	0.0711486	0.168994	-0.00309181	0.0928857	0.0844938	-0.00580844	0.131168	0.0320699	-0.0299794	0.0567493	0.0218052	0.0594932	-0.00995528	0.0269269	-0.0613818	0.130748	-0.00298307	0.0389754	-0.0248215	0.0530326	0.0729577	0.0276556	0.145851	0.146296	-0.0733862	0.0768341	0.140625
TaxonAdjustedID.MGS.down.10000000.v6.3376	CAG03324	MGS	NA	0.113096	0.00467647	0.113662	-0.0365495	-0.074913	-0.0267053	-0.0446521	-0.0438704	-0.0611684	0.0439428	-0.0860737	0.029462	0.0795218	-0.0118713	-0.0316218	0.0297708	-0.0503176	0.0271654	-0.091992	-0.0235824	0.0730232	0.0238441	-0.0541335	-0.0582808	0.0292096	0.111419	-0.0733308	0.140164	0.105023	-0.0958847	0.0246372	-0.0585475	-0.0428401	-0.0439899	-0.0201225	0.0275275	0.0109532	-0.1296	-0.0214421	0.0432021	-0.0144161	0.0786451	-0.0882965	0.000867076	-0.0263161	0.128486
TaxonAdjustedID.MGS.down.10000000.v6.3378	CAG03326	MGS	NA	0.0968483	0.0210585	-0.0989152	0.123502	-0.0286078	0.147634	0.117766	0.0343482	0.0365569	-0.0260597	-0.0191185	0.06831	0.164749	0.0619636	0.0486951	0.00862228	0.0039494	0.0383446	0.0295181	0.0319064	0.0948658	-0.0593744	-0.0365999	0.125599	-0.0570817	-0.00797498	-0.015162	0.124352	-0.163512	-0.0424023	-0.137661	-0.0185938	-0.0335865	0.0250026	-0.0776969	-0.0137336	0.0196106	-0.100608	0.0187834	0.0368845	0.100616	0.0322814	0.0490506	-0.0199472	-0.0301789	0.17959
TaxonAdjustedID.MGS.down.10000000.v6.3379	CAG03327	MGS	NA	0.125823	0.0222232	0.0772577	0.073166	-0.151181	0.12426	0.150048	0.0984372	0.130432	-0.0249025	-0.0156822	0.100818	0.105332	0.046765	0.0787258	-0.0455752	0.0314347	-0.00320951	-0.0467406	0.00300524	0.118547	0.0781957	-0.00844583	-0.0428286	-0.0103829	0.0779833	-0.012708	-0.0412055	0.155812	-0.0232708	0.0827138	0.0477054	0.026014	0.023092	0.0719898	-0.00117681	0.117609	0.0391138	0.136394	-0.050268	0.0503405	0.0768625	0.185299	0.0381029	0.0985852	0.0700816
TaxonAdjustedID.MGS.down.10000000.v6.3383	CAG03331	MGS	NA	-0.0901157	-0.0329974	-0.086315	-0.000710367	0.086009	0.0250423	-0.0554196	-0.0503537	-0.0526217	0.0519134	0.00516853	0.0756922	-0.109139	-0.0435415	0.0145254	0.0659868	0.0519176	0.0318885	-0.0234546	-0.0780725	-0.0127631	0.134661	0.00562474	-0.0223296	-0.0762837	-0.0299101	-0.0147441	-0.0759044	-0.00232478	0.0631992	0.0264618	-0.0240416	0.0594183	0.0904535	-0.0814518	0.00264388	0.0476721	0.0735422	-0.0165191	0.0161653	0.0133948	-0.0515182	-0.0731265	0.0392005	-0.0665229	-0.136575
TaxonAdjustedID.MGS.down.10000000.v6.339	CAG00326	MGS	Bacteria;Firmicutes;unclassified Firmicutes;unclassified Firmicutes;unclassified Firmicutes;unclassified Firmicutes;unclassified Firmicutes	0.198831	0.0178376	-0.0536743	0.206129	-0.157834	0.212106	0.184551	0.120451	0.0248686	-0.0398329	0.0941835	0.186003	0.120979	-0.0190864	0.153811	0.119521	-0.119519	0.0381206	0.0532445	-0.0848254	0.0989897	-0.090357	2.95e-05	0.0453897	-0.0568314	0.0352858	-0.00681347	0.0109771	-0.0161818	0.0176557	-0.071688	0.0866269	-0.0488249	0.0280051	0.0307492	0.0642178	0.0643312	-0.0629107	0.134897	0.0270036	-0.0790207	0.0942217	0.181039	-0.0313065	0.176594	0.0854561
TaxonAdjustedID.MGS.down.10000000.v6.3391	CAG03339	MGS	NA	0.0736249	0.0409861	-0.0155658	0.112501	-0.0997063	0.0617223	0.108228	0.107172	0.0810816	-0.15267	-0.0503351	0.0662077	0.117848	0.0217144	0.0635246	-0.0150838	-0.0999433	0.0361516	-0.0184024	-0.0126422	0.163393	0.0214176	-0.0120325	0.0467874	-0.0222317	0.0836017	-0.0546575	-0.0381614	0.0119695	-0.0289935	-0.0301689	-0.0396939	-0.0417921	-0.0303462	0.115013	0.115034	0.0432129	0.0879058	0.0222513	0.0736292	-0.0118199	0.00731209	0.155235	-0.019906	0.0735508	-0.0582509
TaxonAdjustedID.MGS.down.10000000.v6.3393	CAG03341	MGS	NA	-0.0498076	-0.0565891	-0.0563001	0.177798	-0.126257	0.00195111	-0.0133156	0.0118929	0.0485014	0.0518596	0.0978662	-0.0403533	0.0699389	-0.0837848	0.0124818	0.0767488	0.0428577	0.156984	0.10894	-0.0220722	-0.0717077	-0.0777668	-0.000924549	-0.0211004	-0.066023	-0.0782162	0.120435	0.0866417	0.0229994	0.102727	-0.0266326	-0.00645541	0.0246808	-0.0811451	-0.0422666	0.0573156	-0.0933104	0.070134	0.0238769	0.0979303	0.0150986	-0.0787653	0.0677759	-0.100395	0.0618789	0.0348597
TaxonAdjustedID.MGS.down.10000000.v6.3394	CAG03342	MGS	NA	0.124101	0.0640491	0.0328759	0.00629338	-0.0389206	0.0616095	0.109331	0.121358	-0.00211368	-0.0483461	0.0158008	0.108514	-0.0786496	0.00807347	0.0701817	0.0650877	-0.0311492	-0.0319485	0.0214157	-0.0265454	0.0692917	0.116723	0.10654	-0.0312342	0.0537776	0.136989	-0.0198333	-0.0832419	-0.00761332	-0.012294	0.0295299	0.0657822	-0.0939643	0.00907428	0.0314775	0.0659005	-0.0296319	-0.0477084	0.0912481	-0.0971144	-0.0375346	-0.0423757	0.114034	0.0149909	0.0382391	-0.136288
TaxonAdjustedID.MGS.down.10000000.v6.3396	CAG03344	MGS	NA	0.0741203	-0.0587629	0.046677	0.095469	-0.143781	0.0582048	0.188469	0.211359	0.181116	-0.0103276	-0.0881972	0.0137604	0.0118199	-0.0799465	0.0181533	0.0974555	-0.0482222	0.0515212	0.0706182	-0.0697201	0.198071	-0.0291867	-0.00234119	0.16086	0.0792918	-0.000640763	0.100387	-0.0410629	0.133411	-0.0348308	0.0330884	-0.102135	0.0203709	-0.0949729	0.129036	-0.00943958	-0.0185591	-0.113374	-0.000359604	-0.0345348	-0.0628229	0.020764	0.224267	0.0933316	0.095038	0.0495463
TaxonAdjustedID.MGS.down.10000000.v6.3398	CAG03346	MGS	NA	-0.00431397	-0.0281644	-0.0428919	0.0507346	-0.00952166	0.0237258	0.0197194	-0.0548563	0.0907285	-0.0237016	-0.00340539	0.0214047	0.0758302	0.0723126	-0.0363042	0.0133477	0.00917888	0.0569384	0.0430307	-0.0906781	0.0594883	0.0572251	-0.0177124	-0.019604	-0.0694283	-0.123983	-0.10956	-0.0253992	-0.0579569	0.0242427	0.0310091	0.0364204	0.0498297	-0.0545713	0.03592	0.0505023	-0.0136899	-0.033994	-0.0160106	-0.0166926	0.0146417	0.0197868	-0.0869207	0.0351997	0.0697051	-0.0708095
TaxonAdjustedID.MGS.down.10000000.v6.3402	CAG03350	MGS	NA	0.0653306	0.0311059	0.240796	-0.0593473	-0.177205	0.007977	-0.0789421	-0.00726886	-0.0113809	0.00407952	-0.0216097	0.0117696	-0.041946	0.171986	0.00617264	-0.151591	0.0424302	-0.101942	-0.00670954	-0.0454983	5.32e-05	0.039179	-0.0169975	-0.196465	-0.0960829	-0.0202233	-0.0561446	0.0180651	0.131044	-0.0892106	0.0310314	-0.0156117	0.148724	-0.0298532	0.0815444	-0.0122616	0.0187695	-0.113127	0.0649989	-0.0786807	-0.0806399	-0.0184869	-0.00983114	-0.00517619	0.0328058	-0.0463802
TaxonAdjustedID.MGS.down.10000000.v6.3403	CAG03351	MGS	NA	0.117881	-0.167097	0.011262	0.109732	-0.123381	0.113098	0.0753901	0.0920928	0.133844	-0.0163514	0.004605	0.0457928	0.102063	0.0227825	0.0184242	0.0222846	0.0376383	0.105657	0.135913	-0.099772	0.087184	-0.0280291	0.0872074	-0.0353919	0.0238337	0.0525404	-0.0590713	0.0898221	0.0891798	0.0401998	0.074075	0.0629805	0.136148	0.0295515	-0.00938801	0.0947081	-0.0152305	0.0979017	0.0943052	0.00465721	-0.0427261	-0.0482749	0.0994697	0.0522143	0.0292687	-0.00633715
TaxonAdjustedID.MGS.down.10000000.v6.341	CAG00327	MGS	Bacteria;Firmicutes;Clostridia;Clostridiales;unclassified Clostridiales;unclassified Clostridiales;unclassified Clostridiales	0.114466	-0.192534	0.0242604	0.0450007	-0.0700049	0.0669697	-0.0427636	-0.0946634	0.0504104	0.0925037	-0.0395752	0.0324127	0.0144228	-0.021165	-0.0244095	0.0241828	-0.0301865	0.116856	0.204123	-0.0391709	-0.0497473	0.0842703	-0.0169102	-0.102718	0.0374694	0.116984	-0.0373098	0.0501208	0.0973224	-0.0736126	0.0218719	-0.00285383	0.118539	0.0700492	0.0141402	0.0488193	0.0440612	-0.00458517	0.0453731	0.00391565	-0.0592933	0.109667	0.0282833	0.09745	0.0236504	0.104078
TaxonAdjustedID.MGS.down.10000000.v6.3414	CAG03362	MGS	NA	0.1447	0.0544716	0.0378255	0.233537	-0.276276	0.121809	0.0643878	0.059082	0.0537491	-0.0302807	0.0696443	0.144527	0.108206	-0.0191791	-0.0397411	0.137959	-0.134313	0.172327	0.0521783	-0.0512008	0.0031432	0.0389813	0.0142096	-0.1114	-0.0967138	-0.00662661	0.0398791	-0.0949173	0.0748954	0.0112165	0.0306314	0.0771626	-0.0381683	-0.0235306	0.0318629	0.174472	0.0462799	0.0210128	0.0837807	0.120965	-0.0669428	-0.0301638	0.111479	0.0550221	0.196825	0.00282913
TaxonAdjustedID.MGS.down.10000000.v6.3417	CAG03365	MGS	NA	0.0386122	0.137969	0.111691	0.0219789	-0.132839	0.0137779	-0.0562323	-0.0201454	0.00919733	-0.055793	0.0130279	-0.00651958	0.110201	0.122713	0.0124013	-0.0490947	0.0639231	-0.0235632	0.00772691	-0.0262606	-0.0440465	0.0872019	0.124032	-0.0900224	-0.0550736	0.0638819	-0.0610011	-0.0824266	0.0740535	0.0916025	-0.0549157	0.0147904	0.0449987	0.0918228	0.00260658	0.00151932	-0.0553885	0.0609746	0.119252	0.03898	0.0665327	-0.104688	0.0104887	-0.0784154	0.0501309	-0.0599282
TaxonAdjustedID.MGS.down.10000000.v6.342	CAG00328	MGS	Bacteria;Bacteroidetes;Bacteroidia;Bacteroidales;Rikenellaceae;Alistipes;Alistipes indistinctus	-0.00997776	-0.0315028	0.102446	0.030671	-0.132596	0.0304306	-0.0719808	-0.0941023	0.0623351	-0.0239847	-0.0740977	0.0400142	0.0720607	0.0283283	-0.033835	-0.0303164	-0.00337191	0.0537293	0.0514905	0.0391652	-0.0361217	0.0664086	-0.0549893	-0.0348326	0.00198483	0.172187	-0.00274978	0.124904	0.0199418	0.00794377	0.0184304	-0.0789386	0.127167	-0.0527297	0.0430638	0.0731261	0.00291693	-0.0262057	0.0468426	-0.0874545	0.0543829	0.00609173	0.0221436	0.0580909	-0.0509776	0.103841
TaxonAdjustedID.MGS.down.10000000.v6.3424	CAG03372	MGS	NA	0.0557867	0.0359218	0.0511747	0.0562822	-0.108138	0.0644588	0.049063	0.093868	0.095492	-0.0342529	-0.0024472	0.0242057	0.112324	-0.00551798	0.038956	0.0995204	-0.0263329	0.026814	0.0552708	-0.0232057	0.0643401	0.0671632	0.00862552	0.0595575	-0.0324488	0.060145	-0.013317	0.055781	0.0308785	-0.00746841	0.000340866	0.0282812	0.0186914	-0.0175366	0.0408649	0.040599	-6.32e-05	-0.015413	0.0861912	-0.0502401	-0.0622692	-0.0783968	0.0399611	0.0685255	-0.0450192	0.0265395
TaxonAdjustedID.MGS.down.10000000.v6.3427	CAG03375	MGS	NA	0.0903089	-0.0889803	0.349427	-0.0630807	-0.280716	-0.0561953	-0.0227656	0.0789595	0.127759	-0.102969	-0.0447483	-0.0251606	-0.0743684	0.0845219	-0.0108006	-0.135538	-0.0843903	0.108755	-0.0339399	-0.0112317	0.0296125	0.0945984	-0.113727	-0.101086	0.0096692	0.101892	0.0842996	-0.0534764	0.0853433	-0.138743	0.0146333	-0.0974575	0.0927962	-0.0570714	0.181421	0.0178511	0.051778	-0.00325138	0.0550155	-0.177828	-0.164477	0.00137618	0.162028	0.00404115	-0.000852136	-0.0258431
TaxonAdjustedID.MGS.down.10000000.v6.3429	CAG03377	MGS	NA	0.0769926	0.0134618	-0.0263342	0.0665215	-0.042031	0.113857	-0.0231912	0.0211908	-0.0289233	-0.0962061	-0.0281809	0.0991661	0.0210456	0.0188859	0.0565296	0.00919135	-0.00462223	-0.00304544	-0.0126525	-0.0710602	-0.0255449	-0.0062711	0.0635054	-0.0697132	-0.14255	0.0252433	-0.00553943	-0.0196878	-0.0216154	0.0394834	0.0476488	0.0214759	0.0649975	0.0450415	-0.00800464	0.0675886	0.042864	0.00941713	0.038753	-0.092412	-0.0105546	0.00287821	0.111239	0.0185315	0.0401564	0.028882
TaxonAdjustedID.MGS.down.10000000.v6.343	CAG00329	MGS	Bacteria;Firmicutes;Clostridia;Clostridiales;Lachnospiraceae;Roseburia;Roseburia hominis	0.0374417	-0.0331127	0.0197144	0.0335962	-0.0538468	0.0432659	0.0551776	0.0351567	0.0779288	-0.100806	-0.0933022	-0.0322752	0.0864725	0.0319132	0.06237	-0.0775448	0.00912624	0.0672124	0.0106768	-0.0959358	0.076124	0.0824044	-0.132724	-0.0160271	-0.0787631	-0.00733579	-0.0758562	-0.0418165	-0.0121701	-0.0482288	-0.0983582	-0.0558306	0.00438831	-0.0564767	0.0994811	-0.0279559	0.0657268	0.052455	-0.0110108	-0.120517	-0.0152904	0.0522851	0.089442	0.0308613	-0.0109032	-0.00947593
TaxonAdjustedID.MGS.down.10000000.v6.3431	CAG03379	MGS	NA	0.0561635	0.136426	-0.0169241	0.0405121	-0.0247214	0.0374315	0.0856775	0.00432692	0.071462	-0.00848241	0.0854556	0.058014	0.0164362	0.0695127	0.0540815	-0.0266184	0.0202778	-0.0678188	-0.0131215	-0.0613645	0.0784006	-0.0403371	-0.0903136	0.106148	0.0507195	0.0170041	-0.0339245	-0.0327109	-0.00214339	0.0787453	-0.0227066	0.0258336	-0.00233114	-0.0589535	0.102667	0.00220579	0.0333447	-0.0202473	0.00216712	0.0214525	0.115465	0.0448953	0.0318689	-0.163288	0.104236	-0.045834
TaxonAdjustedID.MGS.down.10000000.v6.3437	CAG03386	MGS	NA	-0.00254607	0.0629364	0.195277	-0.060444	-0.131108	-0.0794499	-0.0326415	0.0426424	0.0558194	0.0594986	0.00735145	-0.0737701	-0.0314699	0.0720003	-0.0268612	-0.0264213	0.00805969	0.0168943	-5.77e-05	-0.0905875	-0.042536	0.0579537	-0.0372958	-0.0184324	-0.112414	-0.00786273	-0.013391	-0.0643045	0.0537635	-0.00458244	0.0994287	0.0141648	-0.0960316	-0.0897269	0.038392	-0.00879186	0.0455667	0.0193057	0.000822647	-0.0399716	-0.126759	0.012653	0.000861395	-0.0421921	-0.0235904	-0.0403019
TaxonAdjustedID.MGS.down.10000000.v6.3438	CAG03388	MGS	NA	0.0951126	-0.225858	0.103517	-0.103	0.00308855	-0.0296473	-0.00600493	0.0346012	0.0421264	0.0262594	-0.0792932	0.00231542	-0.116389	-0.00423873	-0.089857	-0.14257	0.0274873	-0.0270159	-0.00847173	0.0392983	-0.024373	0.0915424	0.0304289	-0.0702946	-0.0128105	0.0356226	0.038084	-0.00975984	0.0902161	-0.131416	-0.0276768	-0.0978465	0.103912	0.0028276	0.0493041	-0.0244132	-0.113445	-0.133415	-0.0324649	-0.0807743	-0.0429849	0.10287	-0.0039045	0.0857405	0.0407292	0.0432659
TaxonAdjustedID.MGS.down.10000000.v6.3444	CAG03394	MGS	NA	0.107871	-0.0243002	-0.0482945	0.13844	-0.0939047	0.0101977	0.0798579	-0.0676063	0.0196244	-0.102247	-0.0104822	-0.00694351	-0.00968983	-0.0948382	-0.0723105	0.0648005	-0.13832	0.242796	0.0439246	-0.0945786	-0.0690035	0.0609365	-0.0635287	0.137963	-0.0926619	0.086677	0.0239569	-0.0151976	-0.0332636	-0.0358051	-0.0274277	-0.025248	0.0937516	-0.0428399	0.014422	0.115739	0.0400576	-0.0784419	0.024268	-0.0668026	-0.0733621	0.002689	0.0200648	-0.0145408	0.199109	-0.0246909
TaxonAdjustedID.MGS.down.10000000.v6.3453	CAG03403	MGS	NA	0.208468	-0.0286781	0.0948782	0.114978	-0.211363	0.0759928	0.136226	0.150186	0.0961332	-0.0712005	-0.0706123	0.0135818	0.0987009	0.0125575	0.0294275	0.0202765	-0.117377	0.0509694	0.0107165	-0.139319	0.158616	-0.00368829	0.0162534	-0.110264	-0.0433781	-0.000778122	-0.0286269	0.0581199	0.0768827	-0.0458683	0.0168494	0.00886189	-0.0614795	-0.0294407	0.0431476	0.0498584	0.050356	-0.0370598	-0.00407685	-0.0839718	-0.0807902	0.0582504	0.176198	0.0244654	0.132504	0.140858
TaxonAdjustedID.MGS.down.10000000.v6.3459	CAG03409	MGS	NA	0.00841057	0.0214321	0.0169727	0.0979477	-0.116968	-0.0280135	0.0104527	-0.0439785	-0.0368811	-0.173195	-0.0168009	-0.0150637	0.0261043	0.0216638	-0.093443	0.0335667	-0.0234908	0.0255331	0.0146161	-0.0864903	-0.0637949	0.0689371	-0.0534569	-0.02927	-0.141965	-0.0260375	0.012228	-0.0755039	-0.0481901	0.0433521	-0.160241	0.000346124	0.00457057	-0.0236139	-0.0210768	0.0199951	-0.0760837	0.0218839	0.00195965	0.0391985	0.0532552	-0.117923	-0.0314043	-0.0251829	0.0701715	0.0625351
TaxonAdjustedID.MGS.down.10000000.v6.348	CAG00335	MGS	Bacteria;Firmicutes;Clostridia;Clostridiales;Lachnospiraceae;Anaerostipes;Anaerostipes hadrus 1	-0.08057	-0.134983	0.0875416	-0.15641	0.0735104	-0.101961	0.0141637	0.0155946	0.0243275	-0.0874937	-0.0908542	-0.129288	-0.133408	-0.0150873	-0.0317367	-0.0681354	-0.0645324	-0.0742543	-0.0118597	0.118037	0.0823812	0.141102	0.0265798	-0.0219755	-0.104056	-0.0310125	-0.0834408	0.0411758	0.0138959	-0.0568118	-0.00428243	-0.126859	-0.0144926	-0.0905668	0.0684671	-0.146775	-0.0685104	0.00807749	-0.0585646	-0.133992	-0.0613567	0.0334238	-0.00559339	0.0597727	-0.0340567	-0.00887473
TaxonAdjustedID.MGS.down.10000000.v6.351	CAG00019_1	MGS	Bacteria;Firmicutes;Clostridia;Clostridiales;Peptostreptococcaceae;Intestinibacter;Intestinibacter bartlettii	0.027609	-0.00473898	0.0118167	0.0125254	-0.0244885	0.0379209	-0.0563324	0.0114342	-0.024503	0.0992259	-0.109052	0.0290501	0.00717236	0.0635677	-0.0656589	-0.030956	0.0329839	-0.0854229	0.129579	0.00740098	-0.0157445	-0.0446004	0.03789	-0.075869	-0.0409316	-0.0635453	-0.0633352	-0.0240622	-0.0399945	0.124565	0.058809	0.116306	0.00535243	0.143673	-0.0618497	0.0425064	-0.0253586	0.0729694	-0.0452796	0.063876	0.00784915	0.0502966	0.00321633	-0.0990272	-0.0456045	-0.0844997
TaxonAdjustedID.MGS.down.10000000.v6.355	CAG00341	MGS	Bacteria;Firmicutes;Clostridia;Clostridiales;Eubacteriaceae;Eubacterium;Eubacterium sp. CAG:115	0.0861802	-0.14293	0.0882271	-0.0376013	-0.0487062	0.0464744	0.149892	0.0758635	0.0571655	0.034697	-0.0374798	-0.0215635	-0.0794422	-0.0500643	0.0606601	-0.124667	-0.0196975	0.0444727	0.186332	-0.0149158	0.110733	0.172288	-0.0268944	0.0208455	-0.11513	0.176778	-0.0823327	0.0818835	0.0860815	-0.173665	-0.00842893	-0.0609128	0.0719999	-0.0307231	0.111618	-0.0378795	0.0579043	-0.0335746	0.00386746	-0.0677304	-0.0712321	0.0518958	0.11565	0.0882215	0.155299	-0.0435345
TaxonAdjustedID.MGS.down.10000000.v6.36	CAG00062	MGS	Bacteria;Bacteroidetes;Bacteroidia;Bacteroidales;Bacteroidaceae;Bacteroides;Bacteroides salyersiae	-0.139148	0.0157268	0.0806597	0.111988	-0.194256	-0.101042	-0.0827961	-0.0188832	0.0168328	-0.109399	0.00792857	-0.0168489	-0.00797669	-0.020312	-0.00035941	0.00170866	-0.128019	0.0842862	0.0490508	-0.00233092	-0.219465	-0.00528011	-0.0163788	-0.0407396	-0.0981962	0.0308331	0.00868911	-0.0724584	-0.0337921	0.080053	0.0120611	-0.0251853	0.0270444	-0.189083	-0.0059925	0.051088	-0.0601429	0.0327244	0.00395309	-0.0181221	-0.097199	-0.041989	-0.00980504	0.0123093	-0.0593507	-0.221031
TaxonAdjustedID.MGS.down.10000000.v6.369	CAG00357	MGS	Bacteria;Bacteroidetes;Bacteroidia;Bacteroidales;Bacteroidaceae;Bacteroides;Bacteroides ovatus	-0.132298	0.0282462	-0.078558	-0.0616541	0.140689	0.0767618	-0.0147782	-0.0553413	-0.0630328	0.0416348	-0.0124187	0.0505512	0.0659637	-0.0449328	-0.0256479	-0.0301097	0.0477601	-0.0971596	-0.0206398	0.00239603	-0.0982237	0.0790523	-0.00131505	0.0115935	-0.094295	-0.0547585	-0.0887201	-0.127785	-0.088872	0.0818435	0.171212	0.0553601	-0.0309794	0.0132545	-0.027274	-0.105822	0.0141739	0.123557	-0.0168793	-0.031127	0.111135	-0.0494444	-0.00826526	-0.00289973	-0.058074	-0.0505389
TaxonAdjustedID.MGS.down.10000000.v6.37	CAG00042	MGS	Bacteria;Firmicutes;Clostridia;Clostridiales;Ruminococcaceae;Gemmiger;unclassified Gemmiger	0.118556	0.102453	-0.101187	0.054301	0.0444274	0.0789314	0.183758	0.148144	-0.0204029	0.0657906	0.0741963	0.0938426	0.106726	-0.0224065	0.0206131	0.0138017	-0.0266842	-0.00341721	-0.0171843	-0.0345531	0.0693986	-0.018255	0.0233269	0.0541088	0.0425007	0.0385297	0.0633189	0.0624859	0.00912125	-0.038307	0.0305275	-0.0718852	-0.154936	-0.0117184	0.0163062	-0.10948	-0.0518926	-0.145313	0.0475047	0.04699	0.0166094	0.124527	0.1018	0.0147312	0.142444	0.0366687
TaxonAdjustedID.MGS.down.10000000.v6.372	CAG00360	MGS	Bacteria;Bacteroidetes;Bacteroidia;Bacteroidales;Rikenellaceae;Alistipes;Alistipes finegoldii	0.144982	-0.0464709	0.00745535	0.0950491	-0.104599	-0.0862688	-0.157221	-0.125104	-0.113443	-0.174284	-0.00241722	-0.0189859	-0.0346484	-0.0627421	-0.0453786	0.00859223	-0.00590721	0.134865	0.0683526	-0.0440481	-0.179455	0.0018276	-0.0629543	-0.0589145	-0.0407017	0.00349684	-0.0565083	-0.0775964	0.0150553	-0.149393	-0.0672576	0.00853699	0.00828484	-0.055545	-0.0757185	-0.0172918	-0.0349634	-0.0464754	-0.0151832	-0.0255872	-0.0138393	-0.0374785	-0.111123	-0.045358	0.0390559	-0.0601154
[truncated: 2,034 more rows]
[truncated: 335 more columns]

## Sheet: ST3
Supplementary Table 3: Microbiome affects the phenome in healthy individuals.
[truncated: 28 more rows]

## Sheet: ST4
Supplementary Table 4: Gut microbial functions associate with circulating proANP levels in healthy individuals.
[truncated: 1,140 more rows]
[truncated: 35 more columns]

[truncated: 16 more sheets: ST5, ST6, ST7, ST8, ST9, ST10, ST11, ST12, ST13, ST14, ST15, ST16, ST17, ST18, ST19, ST20]
